# Supplementary material
Source: publisher figshare collection journal article supplement (https://gsapubs.figshare.com/articles/dataset/_/12530114)
Supplement: Supplementary file 1 [file 1]

| DR Table 1. U-Pb geochronologic analyses. |       |       |      |         |      |                |       |        |       |       |        |       |        |                    |         |        |          |       |
|-------------------------------------------|-------|-------|------|---------|------|----------------|-------|--------|-------|-------|--------|-------|--------|--------------------|---------|--------|----------|-------|
|                                           |       |       |      |         |      | Isotope ratios |       |        |       |       |        |       |        | Apparent ages (Ma) |         |        |          |       |
| Analysis                                  | U     | 206Pb | U/Th | 206Pb*  | ±    | 207Pb*         | ±     | 206Pb* | ±     | error | 206Pb* | ±     | 207Pb* | ±                  | 206Pb*  | ±      | Best age | ±     |
|                                           | (ppm) | 204Pb |      | 207Pb*  | (%)  | 235U*          | (%)   | 238U   | (%)   | corr. | 238U*  | (Ma)  | 235U   | (Ma)               | 207Pb*  | (Ma)   | (Ma)     | (Ma)  |
|                                           |       |       |      |         |      |                |       |        |       |       |        |       |        |                    |         |        |          |       |
| SPP-01-10                                 |       |       |      |         |      |                |       |        |       |       |        |       |        |                    |         |        |          |       |
| SPP0110-1                                 | 3507  | 171   | 4.9  | 5.4665  | 8.3  | 1.0256         | 23.2  | 0.0407 | 21.6  | 0.93  | 256.9  | 54.4  | 716.7  | 119.6              | 2679.6  | 137.9  | 2679.6   | 137.9 |
| SPP0110-2                                 | 4999  | 96    | 1.4  | 6.2504  | 22.3 | 0.2487         | 112.4 | 0.0113 | 110.2 | 0.98  | 72.3   | 79.2  | 225.5  | 231.2              | 2455.5  | 382.6  | 2455.5   | 382.6 |
| SPP0110-3                                 | 721   | 47887 | 0.0  | 3.8470  | 1.6  | 19.6313        | 2.6   | 0.5477 | 2.0   | 0.78  | 2815.7 | 46.3  | 3073.4 | 25.2               | 3246.4  | 25.8   | 3246.4   | 25.8  |
| SPP0110-4                                 | 316   | 23300 | 0.0  | 3.7633  | 2.5  | 18.9498        | 5.5   | 0.5172 | 4.9   | 0.89  | 2687.4 | 107.7 | 3039.3 | 52.9               | 3281.0  | 38.7   | 3281.0   | 38.7  |
| SPP0110-5                                 | 1788  | 319   | 1.5  | 5.7948  | 2.9  | 5.7263         | 6.2   | 0.2407 | 5.5   | 0.88  | 1390.2 | 68.8  | 1935.4 | 54.0               | 2582.7  | 49.2   | 2582.7   | 49.2  |
| SPP0110-6                                 | 3265  | 247   | 2.4  | 4.9122  | 13.9 | 0.2931         | 157.7 | 0.0104 | 157.1 | 1.00  | 67.0   | 104.6 | 261.0  | 379.7              | 2855.1  | 227.8  | 2855.1   | 227.8 |
| SPP0110-7                                 | 314   | 32521 | 1.4  | 4.8532  | 0.1  | 15.8591        | 2.2   | 0.5582 | 2.2   | 1.00  | 2859.3 | 50.2  | 2868.3 | 20.8               | 2874.7  | 1.8    | 2874.7   | 1.8   |
| SPP0110-8                                 | 660   | 1289  | 1.1  | 4.5954  | 0.4  | 12.1008        | 12.2  | 0.4033 | 12.2  | 1.00  | 2184.3 | 226.1 | 2612.2 | 114.9              | 2963.1  | 6.4    | 2963.1   | 6.4   |
| SPP0110-9                                 | 2049  | 288   | 2.2  | 5.3485  | 3.2  | 1.6800         | 23.7  | 0.0652 | 23.5  | 0.99  | 407.0  | 92.8  | 1001.0 | 152.2              | 2715.7  | 53.1   | 2715.7   | 53.1  |
| SPP0110-10                                | 3441  | 116   | 10.6 | 6.2059  | 7.7  | 0.4732         | 38.3  | 0.0213 | 37.5  | 0.98  | 135.8  | 50.4  | 393.4  | 125.4              | 2467.6  | 129.7  | 2467.6   | 129.7 |
| SPP0110-11                                | 575   | 47741 | 0.0  | 3.9523  | 1.4  | 18.0907        | 1.9   | 0.5186 | 1.4   | 0.71  | 2693.1 | 30.3  | 2994.6 | 18.6               | 3203.7  | 21.5   | 3203.7   | 21.5  |
| SPP0110-12                                | 724   | 3651  | 2.1  | 5.3932  | 0.9  | 12.0594        | 8.5   | 0.4717 | 8.5   | 0.99  | 2491.0 | 174.7 | 2609.0 | 79.9               | 2701.9  | 14.6   | 2701.9   | 14.6  |
| SPP0110-13                                | 3261  | 384   | 1.4  | 6.5104  | 3.1  | 2.4190         | 6.2   | 0.1142 | 5.3   | 0.86  | 697.2  | 35.1  | 1248.3 | 44.2               | 2386.4  | 52.8   | 2386.4   | 52.8  |
| SPP0110-14                                | 1643  | 316   | 2.8  | 5.4156  | 2.2  | 5.4913         | 19.3  | 0.2157 | 19.2  | 0.99  | 1259.1 | 219.8 | 1899.2 | 167.6              | 2695.1  | 35.9   | 2695.1   | 35.9  |
| SPP0110-15                                | 736   | 1443  | 0.9  | 4.9211  | 1.2  | 11.4207        | 20.1  | 0.4076 | 20.1  | 1.00  | 2204.0 | 375.4 | 2558.1 | 190.1              | 2852.1  | 19.5   | 2852.1   | 19.5  |
| SPP0110-16                                | 3255  | 415   | 1.7  | 5.4198  | 3.2  | 1.9177         | 32.4  | 0.0754 | 32.2  | 1.00  | 468.5  | 145.6 | 1087.3 | 219.4              | 2693.8  | 52.7   | 2693.8   | 52.7  |
| SPP0110-17                                | 1727  | 1018  | 1.8  | 5.9332  | 0.9  | 7.3915         | 7.6   | 0.3181 | 7.6   | 0.99  | 1780.3 | 117.9 | 2159.9 | 68.4               | 2543.2  | 15.1   | 2543.2   | 15.1  |
| SPP0110-18                                | 154   | 20801 | 2.0  | 4.5788  | 0.3  | 17.3208        | 3.0   | 0.5752 | 3.0   | 1.00  | 2929.1 | 70.1  | 2952.8 | 28.7               | 2968.9  | 4.2    | 2968.9   | 4.2   |
| SPP0110-19                                | 2158  | 460   | 5.7  | 6.1946  | 4.1  | 2.4236         | 23.9  | 0.1089 | 23.5  | 0.99  | 666.3  | 149.1 | 1249.6 | 173.5              | 2470.7  | 69.2   | 2470.7   | 69.2  |
| SPP0110-20                                | 576   | 2581  | 1.2  | 4.8900  | 1.6  | 15.5077        | 13.6  | 0.5500 | 13.5  | 0.99  | 2825.1 | 308.5 | 2847.0 | 130.2              | 2862.4  | 26.8   | 2862.4   | 26.8  |
| SPP0110-21                                | 1063  | 932   | 1.9  | 5.2773  | 2.0  | 10.2377        | 13.4  | 0.3918 | 13.2  | 0.99  | 2131.4 | 240.4 | 2456.5 | 124.5              | 2737.7  | 33.1   | 2737.7   | 33.1  |
| SPP0110-22                                | 3072  | 159   | 1.5  | 5.4250  | 10.8 | 0.5723         | 34.3  | 0.0225 | 32.5  | 0.95  | 143.5  | 46.2  | 459.5  | 127.3              | 2692.2  | 178.4  | 2692.2   | 178.4 |
| SPP0110-23                                | 1072  | 329   | 5.6  | 5.3769  | 4.0  | 9.9549         | 10.7  | 0.3882 | 9.9   | 0.93  | 2114.5 | 178.4 | 2430.6 | 98.8               | 2706.9  | 66.3   | 2706.9   | 66.3  |
| SPP0110-24                                | 2735  | 73    | 1.7  | 6.9808  | 7.2  | 0.2979         | 19.1  | 0.0151 | 17.7  | 0.93  | 96.5   | 17.0  | 264.7  | 44.6               | 2266.8  | 124.6  | 2266.8   | 124.6 |
| SPP0110-25                                | 458   | 1920  | 1.2  | 4.6174  | 1.9  | 11.5738        | 26.3  | 0.3876 | 26.2  | 1.00  | 2111.6 | 472.4 | 2570.6 | 250.4              | 2955.4  | 30.9   | 2955.4   | 30.9  |
| SPP0110-26                                | 2021  | 260   | 2.8  | 5.6795  | 2.3  | 2.6914         | 20.5  | 0.1109 | 20.4  | 0.99  | 677.8  | 131.3 | 1326.1 | 153.2              | 2616.2  | 38.9   | 2616.2   | 38.9  |
| SPP0110-27                                | 728   | 6708  | 3.1  | 37.2723 | 48.4 | 0.0144         | 48.9  | 0.0039 | 6.6   | 0.13  | 25.1   | 1.6   | 14.5   | 7.1                | -1516.3 | 1696.4 | 25.1     | 1.6   |
| SPP0110-28                                | 2463  | 161   | 1.6  | 5.7635  | 4.7  | 0.7701         | 48.2  | 0.0322 | 47.9  | 1.00  | 204.2  | 96.4  | 579.8  | 216.0              | 2591.7  | 77.8   | 2591.7   | 77.8  |
| SPP0110-29                                | 140   | 7768  | 2.9  | 23.0275 | 18.7 | 0.1100         | 19.0  | 0.0184 | 3.9   | 0.20  | 117.3  | 4.5   | 105.9  | 19.2               | -143.1  | 465.5  | 117.3    | 4.5   |
| SPP0110-30                                | 1591  | 558   | 4.6  | 5.8084  | 1.3  | 4.6548         | 11.8  | 0.1961 | 11.7  | 0.99  | 1154.3 | 123.9 | 1759.2 | 98.8               | 2578.8  | 21.2   | 2578.8   | 21.2  |
| SPP0110-31                                | 1563  | 429   | 13.5 | 5.5091  | 1.4  | 4.0000         | 6.4   | 0.1598 | 6.3   | 0.98  | 955.8  | 55.5  | 1634.2 | 52.1               | 2666.8  | 23.3   | 2666.8   | 23.3  |
| SPP0110-32                                | 822   | 341   | 2.4  | 5.5362  | 2.4  | 1.1148         | 120.0 | 0.0448 | 120.0 | 1.00  | 282.3  | 331.7 | 760.5  | 757.4              | 2658.6  | 40.1   | 2658.6   | 40.1  |
| SPP0110-33                                | 2567  | 265   | 1.9  | 5.8409  | 6.9  | 4.5999         | 11.9  | 0.1949 | 9.7   | 0.82  | 1147.7 | 102.1 | 1749.3 | 99.5               | 2569.4  | 114.8  | 2569.4   | 114.8 |
| SPP0110-34                                | 1963  | 348   | 10.6 | 5.6403  | 3.5  | 1.7536         | 26.7  | 0.0717 | 26.5  | 0.99  | 446.6  | 114.3 | 1028.5 | 174.5              | 2627.7  | 58.9   | 2627.7   | 58.9  |
| SPP0110-36                                | 640   | 960   | 5.0  | 5.6475  | 3.7  | 4.7893         | 18.6  | 0.1962 | 18.2  | 0.98  | 1154.7 | 192.9 | 1783.0 | 157.7              | 2625.6  | 62.2   | 2625.6   | 62.2  |
| SPP0110-37                                | 1484  | 232   | 3.6  | 5.4987  | 1.7  | 1.7088         | 9.0   | 0.0681 | 8.9   | 0.98  | 425.0  | 36.5  | 1011.8 | 58.0               | 2669.9  | 27.7   | 2669.9   | 27.7  |
| SPP0110-38                                | 2584  | 116   | 1.9  | 6.1283  | 9.1  | 0.7005         | 18.2  | 0.0311 | 15.8  | 0.87  | 197.7  | 30.8  | 539.1  | 76.4               | 2488.8  | 153.8  | 2488.8   | 153.8 |
| SPP0110-39                                | 1301  | 525   | 7.9  | 5.7449  | 0.9  | 5.6970         | 10.1  | 0.2374 | 10.1  | 1.00  | 1373.0 | 124.4 | 1930.9 | 87.4               | 2597.1  | 15.5   | 2597.1   | 15.5  |
| SPP0110-40                                | 1576  | 376   | 8.7  | 5.8514  | 2.6  | 2.3290         | 5.2   | 0.0988 | 4.5   | 0.86  | 607.6  | 26.0  | 1221.2 | 36.9               | 2566.4  | 43.7   | 2566.4   | 43.7  |
| SPP0110-41                                | 2215  | 288   | 1.8  | 5.3281  | 3.7  | 1.0645         | 64.7  | 0.0411 | 64.6  | 1.00  | 259.9  | 164.6 | 736.1  | 352.4              | 2722.0  | 61.1   | 2722.0   | 61.1  |
| SPP0110-42                                | 2211  | 883   | 3.1  | 6.3427  | 2.2  | 5.0405         | 11.3  | 0.2319 | 11.1  | 0.98  | 1344.3 | 134.7 | 1826.1 | 96.1               | 2430.7  | 36.    |          |       |

|           |  |     |       |     |        |     |         |      |        |      |      |        |       |        |       |        |      |        |      |       |
|-----------|--|-----|-------|-----|--------|-----|---------|------|--------|------|------|--------|-------|--------|-------|--------|------|--------|------|-------|
| FH0108-7  |  | 44  | 24828 | 0.9 | 4.8648 | 1.1 | 15.5617 | 1.2  | 0.5491 | 0.4  | 0.30 | 2821.2 | 8.2   | 2850.3 | 11.3  | 2870.9 | 18.4 | 2870.9 | 18.4 | 98.3  |
| FH0108-4  |  | 233 | 85164 | 2.9 | 4.8586 | 0.8 | 15.7288 | 0.9  | 0.5542 | 0.3  | 0.36 | 2842.8 | 7.4   | 2860.5 | 8.6   | 2872.9 | 13.7 | 2872.9 | 13.7 | 99.0  |
| FH0108-51 |  | 94  | 32828 | 1.5 | 4.8579 | 0.9 | 13.2811 | 1.0  | 0.4679 | 0.4  | 0.37 | 2474.5 | 7.6   | 2699.8 | 9.4   | 2873.1 | 15.0 | 2873.1 | 15.0 | 86.1  |
| FH0108-80 |  | 141 | 33287 | 0.7 | 4.8527 | 1.5 | 15.0922 | 1.6  | 0.5312 | 0.4  | 0.26 | 2746.4 | 9.2   | 2821.1 | 15.0  | 2874.9 | 24.7 | 2874.9 | 24.7 | 95.5  |
| FH0108-87 |  | 182 | 22892 | 1.2 | 4.8525 | 1.1 | 8.8401  | 7.8  | 0.3111 | 7.7  | 0.99 | 1746.2 | 118.4 | 2321.6 | 71.5  | 2874.9 | 18.5 | 2874.9 | 18.5 | 60.7  |
| FH0108-82 |  | 102 | 38744 | 1.1 | 4.8515 | 1.8 | 14.7838 | 1.9  | 0.5202 | 0.8  | 0.40 | 2700.0 | 17.2  | 2801.4 | 18.5  | 2875.3 | 28.9 | 2875.3 | 28.9 | 93.9  |
| FH0108-43 |  | 217 | 28110 | 1.2 | 4.8487 | 1.3 | 9.6006  | 4.5  | 0.3376 | 4.4  | 0.96 | 1875.2 | 70.8  | 2397.2 | 41.7  | 2876.2 | 21.0 | 2876.2 | 21.0 | 65.2  |
| FH0108-10 |  | 133 | 46490 | 1.9 | 4.8471 | 1.2 | 15.3481 | 1.3  | 0.5396 | 0.5  | 0.35 | 2781.6 | 10.4  | 2837.1 | 12.5  | 2876.7 | 20.0 | 2876.7 | 20.0 | 96.7  |
| FH0108-2  |  | 197 | 59714 | 4.9 | 4.8469 | 1.2 | 14.3900 | 1.4  | 0.5058 | 0.6  | 0.42 | 2638.9 | 12.6  | 2775.8 | 13.0  | 2876.8 | 20.2 | 2876.8 | 20.2 | 91.7  |
| FH0108-95 |  | 26  | 10487 | 0.3 | 4.8398 | 1.6 | 15.9725 | 1.7  | 0.5607 | 0.6  | 0.36 | 2869.4 | 14.1  | 2875.2 | 16.3  | 2879.2 | 25.8 | 2879.2 | 25.8 | 99.7  |
| FH0108-83 |  | 242 | 30281 | 1.2 | 4.8386 | 2.2 | 9.8447  | 4.0  | 0.3455 | 3.4  | 0.84 | 1913.0 | 55.8  | 2420.3 | 36.9  | 2879.6 | 34.9 | 2879.6 | 34.9 | 66.4  |
| FH0108-81 |  | 92  | 25028 | 0.9 | 4.8352 | 1.3 | 15.7226 | 1.8  | 0.5514 | 1.1  | 0.65 | 2830.9 | 26.1  | 2860.1 | 16.7  | 2880.7 | 21.6 | 2880.7 | 21.6 | 98.3  |
| FH0108-35 |  | 285 | 30003 | 1.0 | 4.8343 | 1.2 | 13.6804 | 6.5  | 0.4797 | 6.4  | 0.98 | 2525.7 | 133.6 | 2727.8 | 61.6  | 2881.1 | 19.5 | 2881.1 | 19.5 | 87.7  |
| FH0108-15 |  | 259 | 28611 | 1.4 | 4.8320 | 2.0 | 9.4262  | 7.1  | 0.3303 | 6.9  | 0.96 | 1840.0 | 109.7 | 2380.4 | 65.6  | 2881.8 | 32.7 | 2881.8 | 32.7 | 63.8  |
| FH0108-75 |  | 243 | 48420 | 1.8 | 4.8273 | 1.0 | 13.1088 | 5.1  | 0.4590 | 5.0  | 0.98 | 2434.9 | 101.8 | 2687.5 | 48.4  | 2883.4 | 16.9 | 2883.4 | 16.9 | 84.4  |
| FH0108-53 |  | 107 | 21743 | 1.1 | 4.8271 | 0.9 | 11.2710 | 1.3  | 0.3946 | 1.0  | 0.75 | 2144.1 | 18.1  | 2545.8 | 12.4  | 2883.5 | 14.3 | 2883.5 | 14.3 | 74.4  |
| FH0108-25 |  | 156 | 19226 | 1.0 | 4.8266 | 1.1 | 9.3628  | 5.6  | 0.3278 | 5.5  | 0.98 | 1827.5 | 87.4  | 2374.2 | 51.4  | 2883.6 | 17.5 | 2883.6 | 17.5 | 63.4  |
| FH0108-56 |  | 71  | 26252 | 0.5 | 4.8265 | 1.2 | 15.8435 | 1.2  | 0.5546 | 0.2  | 0.18 | 2844.3 | 5.1   | 2867.4 | 11.9  | 2883.7 | 20.0 | 2883.7 | 20.0 | 98.6  |
| FH0108-14 |  | 137 | 29127 | 1.1 | 4.8258 | 1.4 | 10.3600 | 27.6 | 0.3626 | 27.6 | 1.00 | 1994.5 | 474.1 | 2467.5 | 261.4 | 2883.9 | 22.7 | 2883.9 | 22.7 | 69.2  |
| FH0108-45 |  | 390 | 12104 | 1.6 | 4.8256 | 0.8 | 6.7382  | 1.7  | 0.2358 | 1.5  | 0.88 | 1365.0 | 18.7  | 2077.6 | 15.3  | 2884.0 | 13.5 | 2884.0 | 13.5 | 47.3  |
| FH0108-20 |  | 194 | 65412 | 2.7 | 4.8208 | 1.4 | 15.3798 | 1.5  | 0.5377 | 0.7  | 0.47 | 2774.0 | 16.0  | 2839.1 | 14.5  | 2885.6 | 21.9 | 2885.6 | 21.9 | 96.1  |
| FH0108-1  |  | 35  | 13736 | 0.4 | 4.8185 | 0.7 | 16.1092 | 0.9  | 0.5630 | 0.5  | 0.61 | 2878.9 | 12.5  | 2883.3 | 8.5   | 2886.4 | 11.4 | 2886.4 | 11.4 | 99.7  |
| FH0108-48 |  | 736 | 6953  | 1.5 | 4.8170 | 1.1 | 4.3948  | 2.5  | 0.1535 | 2.2  | 0.89 | 920.8  | 18.9  | 1711.4 | 20.5  | 2886.9 | 18.4 | 2886.9 | 18.4 | 31.9  |
| FH0108-34 |  | 254 | 50448 | 2.5 | 4.8165 | 0.7 | 13.3989 | 2.1  | 0.4681 | 2.0  | 0.95 | 2475.0 | 41.3  | 2708.2 | 20.0  | 2887.0 | 10.9 | 2887.0 | 10.9 | 85.7  |
| FH0108-46 |  | 173 | 35319 | 1.9 | 4.8144 | 0.9 | 13.3014 | 11.2 | 0.4644 | 11.2 | 1.00 | 2459.2 | 228.7 | 2701.3 | 106.3 | 2887.8 | 13.8 | 2887.8 | 13.8 | 85.2  |
| FH0108-13 |  | 105 | 26096 | 1.4 | 4.8126 | 1.3 | 14.6529 | 1.5  | 0.5114 | 0.7  | 0.50 | 2662.8 | 15.9  | 2793.0 | 14.0  | 2888.4 | 20.8 | 2888.4 | 20.8 | 92.2  |
| FH0108-90 |  | 84  | 27908 | 1.1 | 4.8119 | 1.2 | 14.8499 | 2.2  | 0.5183 | 1.8  | 0.83 | 2691.8 | 40.0  | 2805.7 | 20.9  | 2888.6 | 19.8 | 2888.6 | 19.8 | 93.2  |
| FH0108-18 |  | 124 | 40875 | 1.0 | 4.8091 | 0.9 | 15.0689 | 1.7  | 0.5256 | 1.5  | 0.86 | 2722.8 | 32.4  | 2819.6 | 16.2  | 2889.5 | 14.1 | 2889.5 | 14.1 | 94.2  |
| FH0108-9  |  | 122 | 40275 | 1.1 | 4.8080 | 1.4 | 14.6276 | 1.6  | 0.5101 | 0.7  | 0.44 | 2656.9 | 15.2  | 2791.3 | 15.2  | 2889.9 | 23.4 | 2889.9 | 23.4 | 91.9  |
| FH0108-76 |  | 144 | 26754 | 1.3 | 4.8080 | 0.9 | 12.5639 | 1.8  | 0.4381 | 1.6  | 0.86 | 2342.2 | 31.0  | 2647.5 | 17.2  | 2889.9 | 14.9 | 2889.9 | 14.9 | 81.0  |
| FH0108-3  |  | 167 | 46857 | 1.2 | 4.8050 | 0.4 | 14.9198 | 0.9  | 0.5199 | 0.8  | 0.89 | 2698.9 | 17.6  | 2810.1 | 8.6   | 2890.9 | 6.7  | 2890.9 | 6.7  | 93.4  |
| FH0108-63 |  | 98  | 26769 | 0.9 | 4.8049 | 1.2 | 11.8878 | 7.6  | 0.4143 | 7.5  | 0.99 | 2234.4 | 141.8 | 2595.6 | 71.4  | 2891.0 | 19.7 | 2891.0 | 19.7 | 77.3  |
| FH0108-50 |  | 62  | 23460 | 0.9 | 4.8027 | 0.9 | 16.4195 | 0.9  | 0.5719 | 0.2  | 0.27 | 2915.7 | 5.6   | 2901.6 | 8.6   | 2891.7 | 14.1 | 2891.7 | 14.1 | 100.8 |
| FH0108-57 |  | 186 | 59792 | 4.3 | 4.8008 | 0.9 | 15.4088 | 0.9  | 0.5365 | 0.3  | 0.33 | 2768.8 | 6.8   | 2840.9 | 8.7   | 2892.4 | 14.0 | 2892.4 | 14.0 | 95.7  |
| FH0108-32 |  | 141 | 43299 | 1.8 | 4.7972 | 1.2 | 15.9070 | 1.6  | 0.5534 | 1.0  | 0.63 | 2839.5 | 22.7  | 2871.2 | 15.0  | 2893.6 | 19.8 | 2893.6 | 19.8 | 98.1  |
| FH0108-98 |  | 117 | 23273 | 0.9 | 4.7969 | 0.7 | 11.7155 | 3.4  | 0.4076 | 3.3  | 0.98 | 2203.9 | 62.3  | 2581.9 | 32.0  | 2893.7 | 12.0 | 2893.7 | 12.0 | 76.2  |
| FH0108-17 |  | 211 | 74667 | 1.9 | 4.7962 | 1.3 | 16.1106 | 1.3  | 0.5604 | 0.4  | 0.27 | 2868.3 | 8.3   | 2883.4 | 12.5  | 2893.9 | 20.4 | 2893.9 | 20.4 | 99.1  |
| FH0108-54 |  | 226 | 68819 | 3.4 | 4.7952 | 1.4 | 14.3981 | 2.9  | 0.5007 | 2.5  | 0.87 | 2617.0 | 54.0  | 2776.3 | 27.2  | 2894.2 | 22.6 | 2894.2 | 22.6 | 90.4  |
| FH0108-88 |  | 93  | 30564 | 1.7 | 4.7949 | 2.3 | 14.8416 | 2.9  | 0.5161 | 1.8  | 0.61 | 2682.7 | 39.1  | 2805.1 | 27.7  | 2894.3 | 37.5 | 2894.3 | 37.5 | 92.7  |
| FH0108-58 |  | 78  | 28994 | 0.9 | 4.7939 | 1.2 | 15.6080 | 1.2  | 0.5427 | 0.3  | 0.22 | 2794.6 | 6.1   | 2853.1 | 11.6  | 2894.7 | 19.3 | 2894.7 | 19.3 | 96.5  |
| FH0108-47 |  | 85  | 31262 | 0.7 | 4.7921 | 0.9 | 16.0065 | 1.0  | 0.5563 | 0.4  | 0.36 | 2851.4 | 8.1   | 2877.2 | 9.3   | 2895.3 | 14.8 | 2895.3 | 14.8 | 98.5  |
| FH0108-33 |  | 218 | 37997 | 1.5 | 4.7882 | 0.8 | 13.5292 | 2.4  | 0.4698 | 2.3  | 0.94 | 2482.8 | 47.6  | 2717.3 | 23.1  | 2896.6 | 13.0 | 2896.6 | 13.0 | 85.7  |
| FH0108-52 |  | 160 | 49923 | 1.8 | 4.7877 | 1.2 | 15.9527 | 1.3  | 0.5539 | 0.4  | 0.27 | 2841.5 | 8.0   | 2874.0 | 12.3  | 2896.8 | 20.1 | 2896.8 | 20.1 | 98.1  |
| FH0108-79 |  | 183 | 59256 | 3.6 | 4.7859 | 0.9 | 16.0753 | 0.9  | 0.5580 | 0.2  | 0.19 | 2858.3 | 3.9   | 2881.3 | 8.8   | 2897.4 | 14.6 | 2897.4 | 14.6 | 98.7  |
| FH0108-24 |  | 522 | 16940 | 1.6 | 4.7852 | 1.1 | 7.1102  | 2.6  | 0.2468 | 2.4  | 0.92 | 1421.8 | 30.7  | 2125.3 | 23.4  | 2897.6 | 17.0 | 2897.6 | 17.0 | 49.1  |
| FH0108-22 |  | 105 | 27338 | 1.0 | 4.7843 | 1.0 | 16.0931 | 1.4  | 0.5584 | 1.0  | 0.71 | 2860.1 | 23.3  | 2882.3 | 13.5  | 2897.9 | 16.1 | 2897.9 | 16.1 | 98.7  |
| FH0108-19 |  | 195 | 61263 | 2.1 | 4.7820 | 1.0 | 14.4523 | 1.1  | 0.5012 | 0.5  | 0.42 | 2619.1 | 10.3  | 2779.9 | 10.8  | 2898.7 | 16.7 | 2898.7 | 16.7 | 90.4  |
| FH0108-16 |  | 419 | 11903 | 0.8 | 4.7815 | 2.0 | 6.9998  | 4.7  | 0.2427 | 4.3  | 0.91 | 1401.0 | 53.9  | 2111.4 | 42.0  | 2898.9 | 32.3 | 2898.9 | 32.3 | 48.3  |
| FH0108-77 |  | 70  | 19526 | 0.7 | 4.7782 | 1.2 | 16.3222 | 1.2  | 0.5656 | 0.2  | 0.15 | 2889.9 | 4.2   | 2895.9 | 11.5  | 2900.0 | 19.3 | 2900.0 | 19.3 | 99.7  |
| FH0108-96 |  | 126 | 36995 | 1.0 | 4.7763 | 2.5 | 15.3053 | 2.6  | 0.5302 | 0.7  | 0.28 | 2742.3 | 15.9  | 2834.4 | 24.6  | 2900.6 | 40.2 | 2900.6 | 40.2 | 94.5  |
| FH0108-72 |  | 72  | 18498 | 0.9 | 4.7749 | 1.2 | 15.9651 | 1.7  | 0.5529 | 1.3  | 0.75 | 2837.2 | 29.8  | 2874.7 | 16.7  | 2901.1 | 18.8 | 2901.1 | 18.8 | 97.8  |
| FH0108-27 |  | 139 | 45894 | 0.9 | 4.7728 | 1.2 | 16.4771 | 1.5  | 0.5704 | 0.9  | 0.59 | 2909.3 | 20.8  | 2904.9 | 14.5  | 2901.8 | 19.9 | 2901.8 | 19.9 | 100.3 |
| FH0108-68 |  | 121 | 42804 | 1.2 | 4.7721 | 0.6 | 15.6786 | 0.9  | 0.5426 | 0.6  | 0.69 | 2794.5 | 13.6  | 2857.4 | 8.3   | 2902.1 | 10.2 | 2902.1 | 10.2 | 96.3  |
| FH0108-66 |  | 78  | 31245 | 0.8 | 4.7708 | 1.0 | 16.6112 | 1.0  | 0.5748 | 0.2  | 0.16 | 2927.3 | 4.0   | 2912.7 | 9.9   | 2902.5 | 16.5 | 2902.5 | 16.5 | 100.9 |
| FH0108-74 |  | 211 | 46463 | 1.0 | 4.7705 | 1.4 | 14.9515 | 2.5  | 0.5173 | 2.1  | 0.83 | 2687.7 | 45.9  | 2812.2 | 24.0  | 2902.6 | 22.9 | 2902.6 | 22.9 | 92.6  |
| FH0108-23 |  | 88  | 30048 | 1.2 | 4.7694 | 0.9 | 16.3595 | 1.3  | 0.5659 | 0.9  | 0.73 | 2890.9 | 21.4  | 2898.0 | 12.0  | 2903.0 | 13.8 | 2903.0 | 13.8 | 99.6  |
| FH0108-97 |  | 95  | 27614 | 0.9 | 4.7677 | 1.3 | 15.1292 | 1.5  | 0.5231 | 0.7  | 0.46 | 2712.5 | 15.3  | 2823.4 | 14.4  | 2903.6 | 21.7 | 2903.6 | 21.7 | 93.4  |
| FH0108-86 |  | 106 | 28950 | 2.0 | 4.7675 | 1.5 | 14.8684 | 2.6  | 0.5141 | 2.0  | 0.80 | 2674.1 | 44.7  | 2806.9 | 24.3  | 2903.6 | 25.0 | 2903.6 | 25.0 | 92.1  |
| FH0108-89 |  | 357 | 12558 | 1.3 | 4.7670 | 1.9 | 7.0537  | 3.2  | 0.2439 | 2.6  | 0.81 | 1406.8 | 32.4  | 2118.2 | 28.3  | 2903.8 | 30.5 | 2903.8 | 30.5 | 48.4  |
| FH0108-78 |  | 208 | 82601 | 2.5 | 4.7645 | 0.8 | 16.1898 | 0.9  | 0.5594 | 0.4  | 0.43 | 2864.4 | 9.3   | 2888.1 | 8.8   | 2904.6 | 13.5 | 2904.6 | 13.5 | 98.6  |
| FH0108-26 |  | 205 | 48098 | 2.2 | 4.7635 | 1.0 | 15.6939 | 1.1  | 0.5422 | 0.3  | 0.24 | 2792.6 | 5.9   | 2858.3 | 10.2  | 2905.0 | 16.9 | 2905.0 | 16.9 | 96.1  |
| FH0108-84 |  | 13  |       |     |        |     |         |      |        |      |      |        |       |        |       |        |      |        |      |       |



|                |     |        |     |         |      |         |      |        |     |      |        |       |        |      |        |       |        |       |             |
|----------------|-----|--------|-----|---------|------|---------|------|--------|-----|------|--------|-------|--------|------|--------|-------|--------|-------|-------------|
| FH01-10 - 60   | 178 | 103317 | 2.9 | 9.1327  | 0.4  | 4.8129  | 0.9  | 0.3188 | 0.8 | 0.89 | 1783.8 | 12.6  | 1787.2 | 7.7  | 1791.0 | 7.7   | 1791.0 | 7.7   | 99.6        |
| FH01-10 - 105  | 215 | 157207 | 3.1 | 9.1219  | 0.5  | 4.7675  | 2.1  | 0.3154 | 2.1 | 0.98 | 1767.3 | 31.7  | 1779.2 | 17.6 | 1793.2 | 8.2   | 1793.2 | 8.2   | 98.6        |
| FH01-10 - 97   | 220 | 129300 | 1.9 | 9.1112  | 0.4  | 4.7222  | 1.3  | 0.3120 | 1.2 | 0.94 | 1750.8 | 18.5  | 1771.2 | 10.8 | 1795.3 | 8.1   | 1795.3 | 8.1   | 97.5        |
| FH01-10 - 81   | 236 | 319205 | 1.0 | 9.1079  | 0.7  | 4.9621  | 2.2  | 0.3278 | 2.1 | 0.94 | 1827.6 | 33.7  | 1812.9 | 18.9 | 1796.0 | 13.5  | 1796.0 | 13.5  | 101.8       |
| FH01-10 - 99   | 311 | 216692 | 2.5 | 9.1020  | 0.3  | 4.8915  | 4.8  | 0.3229 | 4.7 | 1.00 | 1803.9 | 74.6  | 1800.8 | 40.1 | 1797.2 | 6.0   | 1797.2 | 6.0   | 100.4       |
| FH01-10 - 40   | 42  | 20224  | 6.7 | 9.0730  | 1.8  | 4.8175  | 2.6  | 0.3170 | 2.0 | 0.74 | 1775.1 | 30.3  | 1788.0 | 22.1 | 1803.0 | 31.8  | 1803.0 | 31.8  | 98.5        |
| FH01-10 - 96   | 126 | 92470  | 1.4 | 9.0719  | 1.3  | 4.7965  | 1.5  | 0.3156 | 0.8 | 0.52 | 1768.2 | 12.6  | 1784.3 | 13.0 | 1803.2 | 24.0  | 1803.2 | 24.0  | 98.1        |
| FH01-10 - 55   | 47  | 46419  | 2.6 | 8.9408  | 2.1  | 5.0516  | 4.3  | 0.3276 | 3.8 | 0.87 | 1826.6 | 59.9  | 1828.0 | 36.6 | 1829.6 | 38.2  | 1829.6 | 38.2  | 99.8        |
| FH01-10 - 92   | 147 | 92979  | 4.9 | 8.8982  | 1.1  | 5.0780  | 2.9  | 0.3277 | 2.7 | 0.93 | 1827.3 | 43.5  | 1832.4 | 25.0 | 1838.3 | 19.5  | 1838.3 | 19.5  | 99.4        |
| FH01-10 - 38   | 212 | 158809 | 2.1 | 8.8196  | 0.7  | 5.2090  | 3.7  | 0.3332 | 3.7 | 0.98 | 1853.9 | 59.0  | 1854.1 | 31.7 | 1854.3 | 12.4  | 1854.3 | 12.4  | 100.0       |
| FH01-10 - 7    | 310 | 43115  | 1.5 | 8.8144  | 0.4  | 3.9100  | 3.8  | 0.2500 | 3.7 | 0.99 | 1438.3 | 48.2  | 1615.8 | 30.4 | 1855.4 | 7.2   | 1855.4 | 7.2   | 77.5        |
| FH01-10 - 75   | 355 | 181336 | 2.3 | 8.8075  | 0.2  | 5.2860  | 4.2  | 0.3377 | 4.2 | 1.00 | 1875.4 | 68.2  | 1866.6 | 35.9 | 1856.8 | 4.2   | 1856.8 | 4.2   | 101.0       |
| FH01-10 - 33   | 180 | 91256  | 1.8 | 8.7919  | 0.4  | 5.0830  | 8.3  | 0.3241 | 8.3 | 1.00 | 1809.8 | 131.2 | 1833.3 | 70.7 | 1860.0 | 6.8   | 1860.0 | 6.8   | 97.3        |
| FH01-10 - 27   | 284 | 421000 | 1.6 | 8.7444  | 0.3  | 5.0379  | 2.0  | 0.3195 | 2.0 | 0.99 | 1787.3 | 31.6  | 1825.7 | 17.4 | 1869.8 | 5.5   | 1869.8 | 5.5   | 95.6        |
| FH01-10 - 66   | 303 | 423178 | 4.2 | 6.7433  | 1.6  | 8.1824  | 3.2  | 0.4002 | 2.7 | 0.87 | 2169.9 | 50.5  | 2251.4 | 28.7 | 2326.3 | 27.2  | 2326.3 | 27.2  | 93.3        |
| FH01-10 - 46   | 75  | 97744  | 0.9 | 5.4648  | 0.6  | 13.0747 | 3.1  | 0.5182 | 3.0 | 0.98 | 2691.6 | 67.0  | 2685.1 | 29.3 | 2680.1 | 10.3  | 2680.1 | 10.3  | 100.4       |
| FH01-10 - 79   | 310 | 203715 | 1.1 | 5.4569  | 0.4  | 12.5870 | 6.3  | 0.4982 | 6.3 | 1.00 | 2605.9 | 134.4 | 2649.3 | 59.2 | 2682.5 | 6.5   | 2682.5 | 6.5   | 97.1        |
| FH01-10 - 95   | 166 | 132667 | 1.4 | 5.4246  | 0.4  | 10.4373 | 8.5  | 0.4106 | 8.5 | 1.00 | 2217.8 | 159.5 | 2474.4 | 79.0 | 2692.4 | 6.0   | 2692.4 | 6.0   | 82.4        |
| FH01-10 - 5    | 25  | 39370  | 2.1 | 5.3494  | 0.9  | 13.1975 | 2.9  | 0.5120 | 2.8 | 0.95 | 2665.3 | 60.9  | 2693.9 | 27.8 | 2715.4 | 15.7  | 2715.4 | 15.7  | 98.2        |
| FH01-10 - 30   | 77  | 47300  | 1.1 | 5.0634  | 0.7  | 15.5723 | 2.0  | 0.5719 | 1.9 | 0.94 | 2915.5 | 44.0  | 2850.9 | 19.0 | 2805.6 | 10.8  | 2805.6 | 10.8  | 103.9       |
| FH01-10 - 14   | 121 | 137261 | 1.0 | 4.9288  | 0.7  | 14.9986 | 2.8  | 0.5362 | 2.7 | 0.96 | 2767.3 | 61.6  | 2815.1 | 27.0 | 2849.6 | 12.1  | 2849.6 | 12.1  | 97.1        |
| FH01-10 - 20   | 61  | 50491  | 0.8 | 4.9247  | 0.9  | 16.1998 | 3.1  | 0.5786 | 2.9 | 0.95 | 2943.1 | 69.1  | 2888.7 | 29.4 | 2850.9 | 15.3  | 2850.9 | 15.3  | 103.2       |
| FH01-10 - 49   | 233 | 293840 | 1.2 | 4.9148  | 0.3  | 15.7759 | 3.0  | 0.5623 | 3.0 | 1.00 | 2876.3 | 69.3  | 2863.3 | 28.6 | 2854.2 | 4.5   | 2854.2 | 4.5   | 100.8       |
| FH01-10 - 6    | 121 | 245646 | 2.6 | 4.9006  | 0.4  | 15.5089 | 3.6  | 0.5512 | 3.6 | 0.99 | 2830.3 | 82.0  | 2847.0 | 34.4 | 2858.9 | 6.6   | 2858.9 | 6.6   | 99.0        |
| FH01-10 - 21   | 127 | 102470 | 2.2 | 4.8703  | 0.5  | 15.7333 | 2.0  | 0.5557 | 1.9 | 0.97 | 2849.0 | 44.6  | 2860.7 | 19.1 | 2869.0 | 7.8   | 2869.0 | 7.8   | 99.3        |
| FH01-10 - 2    | 90  | 90042  | 0.7 | 4.8206  | 0.4  | 16.2221 | 4.4  | 0.5672 | 4.4 | 1.00 | 2896.1 | 102.7 | 2890.0 | 42.3 | 2885.7 | 6.5   | 2885.7 | 6.5   | 100.4       |
| FH01-10 - 77   | 135 | 84359  | 0.9 | 4.8205  | 0.3  | 16.3008 | 1.1  | 0.5699 | 1.0 | 0.97 | 2907.4 | 24.5  | 2894.6 | 10.3 | 2885.7 | 4.2   | 2885.7 | 4.2   | 100.8       |
| FH01-10 - 10   | 99  | 82576  | 0.6 | 4.8079  | 0.5  | 15.6260 | 3.1  | 0.5449 | 3.0 | 0.99 | 2803.8 | 69.1  | 2854.2 | 29.4 | 2890.0 | 8.2   | 2890.0 | 8.2   | 97.0        |
| FH01-10 - 42   | 27  | 25530  | 2.0 | 4.7125  | 1.1  | 16.3442 | 2.7  | 0.5586 | 2.4 | 0.91 | 2860.9 | 56.4  | 2897.1 | 25.7 | 2922.4 | 18.0  | 2922.4 | 18.0  | 97.9        |
| FH01-10 - 53   | 102 | 210581 | 2.0 | 4.6694  | 0.3  | 17.8248 | 5.2  | 0.6036 | 5.1 | 1.00 | 3044.5 | 124.9 | 2980.3 | 49.6 | 2937.3 | 5.5   | 2937.3 | 5.5   | 103.7       |
| FH01-10 - 23   | 109 | 105651 | 1.6 | 4.6287  | 0.5  | 15.2804 | 5.8  | 0.5130 | 5.8 | 1.00 | 2669.3 | 126.7 | 2832.9 | 55.5 | 2951.4 | 7.7   | 2951.4 | 7.7   | 90.4        |
| FH01-10 - 36   | 142 | 201449 | 2.4 | 4.6252  | 0.2  | 17.1104 | 2.9  | 0.5740 | 2.9 | 1.00 | 2924.1 | 68.3  | 2941.0 | 28.0 | 2952.7 | 3.9   | 2952.7 | 3.9   | 99.0        |
| FH01-10 - 26   | 153 | 139537 | 1.7 | 4.6248  | 0.3  | 17.4623 | 2.1  | 0.5857 | 2.0 | 0.98 | 2972.0 | 48.4  | 2960.6 | 19.9 | 2952.8 | 6.5   | 2952.8 | 6.5   | 100.7       |
| FH01-10 - 83   | 178 | 266500 | 1.6 | 4.6104  | 0.4  | 17.2059 | 1.3  | 0.5753 | 1.2 | 0.98 | 2929.6 | 29.4  | 2946.4 | 12.2 | 2957.8 | 4.2   | 2957.8 | 4.2   | 99.0        |
| FH01-10 - 100  | 132 | 245225 | 5.0 | 4.5516  | 0.2  | 17.6336 | 1.3  | 0.5821 | 1.3 | 0.98 | 2957.3 | 30.1  | 2970.0 | 12.4 | 2978.5 | 3.9   | 2978.5 | 3.9   | 99.3        |
| BCRA0110 - 12  | 263 | 46337  | 0.8 | 18.5160 | 3.5  | 0.4330  | 4.9  | 0.0581 | 3.4 | 0.70 | 364.3  | 12.1  | 365.3  | 14.9 | 371.3  | 77.8  | 364.3  | 12.1  | NA 1.5, 0.9 |
| BCRA0110 - 31  | 85  | 7779   | 1.3 | 18.2001 | 15.6 | 0.4609  | 16.7 | 0.0608 | 6.2 | 0.37 | 380.7  | 22.9  | 384.8  | 53.7 | 410.0  | 349.7 | 380.7  | 22.9  | NA          |
| BCRA0110 - 16  | 62  | 5919   | 1.3 | 17.9827 | 15.1 | 0.4992  | 15.5 | 0.0651 | 3.5 | 0.22 | 406.6  | 13.6  | 411.2  | 52.5 | 436.8  | 338.7 | 406.6  | 13.6  | NA          |
| BCRA0110 - 78  | 143 | 24294  | 0.9 | 19.4321 | 9.5  | 0.4646  | 10.9 | 0.0655 | 5.5 | 0.50 | 408.9  | 21.7  | 387.5  | 35.2 | 261.5  | 217.7 | 408.9  | 21.7  | NA          |
| BCRA0110 - 7   | 200 | 32072  | 0.8 | 19.0085 | 5.3  | 0.4869  | 5.7  | 0.0671 | 2.0 | 0.35 | 418.8  | 8.0   | 402.8  | 18.9 | 311.9  | 121.2 | 418.8  | 8.0   | NA          |
| BCRA0110 - 72  | 141 | 15423  | 0.8 | 18.6599 | 3.6  | 0.5160  | 4.5  | 0.0698 | 2.7 | 0.59 | 435.1  | 11.2  | 422.5  | 15.6 | 353.9  | 82.3  | 435.1  | 11.2  | NA          |
| BCRA0110 - 60  | 151 | 29974  | 1.2 | 18.7024 | 5.6  | 0.5281  | 6.5  | 0.0716 | 3.4 | 0.52 | 446.0  | 14.5  | 430.5  | 22.8 | 348.8  | 125.7 | 446.0  | 14.5  | NA          |
| BCRA0110 - 96  | 318 | 46559  | 1.0 | 17.7011 | 2.7  | 0.5588  | 3.8  | 0.0717 | 2.7 | 0.70 | 446.6  | 11.7  | 450.7  | 14.0 | 471.8  | 60.6  | 446.6  | 11.7  | NA          |
| BCRA0110 - 29  | 133 | 27803  | 0.9 | 18.4307 | 7.8  | 0.5384  | 8.7  | 0.0720 | 3.8 | 0.44 | 448.0  | 16.3  | 437.4  | 30.8 | 381.7  | 175.6 | 448.0  | 16.3  | NA          |
| BCRA0110 - 45  | 130 | 24294  | 1.2 | 19.9167 | 8.9  | 0.5096  | 9.3  | 0.0736 | 2.8 | 0.30 | 457.9  | 12.3  | 418.2  | 31.9 | 204.7  | 206.3 | 457.9  | 12.3  | NA          |
| BCRA0110 - 50  | 57  | 10087  | 0.8 | 17.8891 | 17.8 | 0.5754  | 18.9 | 0.0747 | 6.3 | 0.34 | 464.1  | 28.4  | 461.5  | 70.1 | 448.4  | 397.6 | 464.1  | 28.4  | NA          |
| BCRA0110 - 9   | 60  | 7651   | 0.7 | 17.9972 | 9.6  | 0.5973  | 10.8 | 0.0780 | 5.0 | 0.46 | 484.0  | 23.2  | 475.5  | 41.1 | 435.0  | 214.3 | 484.0  | 23.2  | NA          |
| BCRA0110 - 85  | 225 | 42683  | 1.9 | 17.1398 | 3.3  | 0.6568  | 4.2  | 0.0816 | 2.7 | 0.63 | 505.9  | 13.0  | 512.6  | 17.0 | 542.7  | 71.8  | 505.9  | 13.0  | 93.2        |
| BCRA0110 - 100 | 103 | 27730  | 0.7 | 16.7102 | 8.7  | 0.7500  | 9.2  | 0.0909 | 3.1 | 0.34 | 560.8  | 16.7  | 568.2  | 40.3 | 597.9  | 189.0 | 560.8  | 16.7  | 93.8        |
| BCRA0110 - 66  | 86  | 19653  | 1.5 | 15.4773 | 4.3  | 1.2008  | 6.8  | 0.1348 | 5.2 | 0.77 | 815.1  | 40.2  | 800.9  | 37.7 | 761.7  | 91.5  | 815.1  | 40.2  | 107.0       |
| BCRA0110 - 27  | 346 | 136676 | 2.5 | 14.2364 | 0.4  | 1.5083  | 3.8  | 0.1557 | 3.7 | 0.99 | 933.0  | 32.5  | 933.7  | 23.0 | 935.5  | 9.1   | 935.5  | 9.1   | 99.7        |
| BCRA0110 - 80  | 85  | 21397  | 2.3 | 14.1196 | 3.6  | 1.6543  | 5.8  | 0.1694 | 4.5 | 0.78 | 1008.9 | 41.7  | 991.2  | 36.5 | 952.3  | 74.3  | 952.3  | 74.3  | 105.9       |
| BCRA0110 - 21  | 46  | 24550  | 1.9 | 14.0402 | 8.3  | 1.7031  | 8.5  | 0.1734 | 1.5 | 0.18 | 1030.9 | 14.7  | 1009.7 | 54.2 | 963.9  | 170.2 | 963.9  | 170.2 | 107.0       |
| BCRA0110 - 47  | 62  | 17623  | 2.5 | 13.9465 | 7.6  | 1.6435  | 8.5  | 0.1662 | 3.8 | 0.45 | 991.4  | 35.2  | 987.1  | 53.8 | 977.5  | 155.2 | 977.5  | 155.2 | 101.4       |
| BCRA0110 - 42  | 64  | 27492  | 0.8 | 13.7433 | 3.7  | 1.8275  | 4.7  | 0.1822 | 2.9 | 0.62 | 1078.7 | 29.0  | 1055.4 | 31.1 | 1007.3 | 75.5  | 1007.3 | 75.5  | 107.1       |
| BCRA0110 - 39  | 116 | 41342  | 2.1 | 13.7084 | 2.2  | 1.7837  | 7.5  | 0.1773 | 7.2 | 0.96 | 1052.4 | 69.9  | 1039.5 | 48.9 | 1012.5 | 43.9  | 1012.5 | 43.9  | 103.9       |
| BCRA0110 - 69  | 203 | 53536  | 2.0 | 13.6860 | 1.7  | 1.7700  | 5.5  | 0.1757 | 5.3 | 0.95 | 1043.4 | 50.6  | 1034.5 | 35.9 | 1015.8 | 35.1  | 1015.8 | 35.1  | 102.7       |
| BCRA0110 - 15  | 248 | 79488  | 2.0 | 13.6177 | 1.5  | 1.7329  | 3.3  | 0.1711 | 2.9 | 0.89 | 1018.4 | 27.6  | 1020.8 | 21.1 | 1025.9 | 29.8  | 1025.9 | 29.8  | 99.3        |
| BCRA0110 - 13  | 90  | 39164  | 0.9 | 13.5943 | 3.2  | 1.7998  | 4.1  | 0.1775 | 2.6 | 0.62 | 1053.1 | 24.8  | 1045.4 | 26.9 | 1029.4 | 65.2  | 1029.4 | 65.2  | 102.3       |
| BCRA0110 - 67  | 65  | 20180  | 1.5 | 13.5786 | 3.0  | 1.7499  | 5.0  | 0.1723 | 4.0 | 0.80 | 1024.9 | 37.9  | 1027.1 | 32.3 | 1031.7 | 60.4  | 1031.7 | 60.4  | 99.3        |
| BCRA0110 - 4   | 283 | 100642 | 2.1 | 13.5654 | 0.7  | 1.8195  | 3.7  | 0.1790 | 3.6 | 0.98 | 1061.6 | 35.5  | 1052.5 | 24.2 | 1033.7 | 14.2  | 1033.7 | 14.2  | 102.7       |
| BCRA0110 - 17  | 219 | 118606 | 6.3 | 13.5415 | 1.5  | 1.7585  | 4.3  | 0.1727 | 4.0 | 0.94 | 1027.0 | 38.3  | 1030.3 | 27.9 | 1037.3 | 30.2  | 1037.3 | 30.2  | 99.0        |
| BCRA0110 - 48  |     |        |     |         |      |         |      |        |     |      |        |       |        |      |        |       |        |       |             |

[illegible]

[illegible]



[illegible]

|              |     |        |      |         |      |         |      |        |     |      |        |       |        |      |        |       |        |       |             |
|--------------|-----|--------|------|---------|------|---------|------|--------|-----|------|--------|-------|--------|------|--------|-------|--------|-------|-------------|
| HB0110 - 86  | 140 | 121783 | 1.5  | 9.8305  | 0.8  | 4.0348  | 2.7  | 0.2877 | 2.6 | 0.95 | 1629.9 | 36.8  | 1641.2 | 21.8 | 1655.8 | 15.0  | 1655.8 | 15.0  | 98.4        |
| HB0110 - 38  | 172 | 93972  | 1.2  | 9.8111  | 1.0  | 4.1425  | 3.1  | 0.2948 | 2.9 | 0.95 | 1665.3 | 43.2  | 1662.7 | 25.5 | 1659.5 | 18.6  | 1659.5 | 18.6  | 100.4       |
| HB0110 - 28  | 154 | 73724  | 1.0  | 9.7991  | 1.0  | 4.1012  | 3.1  | 0.2915 | 2.9 | 0.94 | 1648.9 | 42.4  | 1654.5 | 25.2 | 1661.7 | 18.7  | 1661.7 | 18.7  | 99.2        |
| HB0110 - 30  | 95  | 76520  | 1.7  | 9.7865  | 1.2  | 4.1187  | 3.1  | 0.2923 | 2.9 | 0.93 | 1653.2 | 42.6  | 1658.0 | 25.7 | 1664.1 | 21.8  | 1664.1 | 21.8  | 99.3        |
| HB0110 - 78  | 111 | 67087  | 0.8  | 9.7754  | 0.9  | 3.9954  | 2.0  | 0.2833 | 1.7 | 0.88 | 1607.8 | 24.6  | 1633.3 | 15.9 | 1666.2 | 17.0  | 1666.2 | 17.0  | 96.5        |
| HB0110 - 16  | 101 | 143300 | 1.8  | 9.4518  | 1.1  | 4.7030  | 3.9  | 0.3224 | 3.7 | 0.96 | 1801.4 | 58.6  | 1767.8 | 32.6 | 1728.2 | 20.4  | 1728.2 | 20.4  | 104.2       |
| HB0110 - 39  | 994 | 156058 | 2.8  | 9.3596  | 0.5  | 3.5195  | 3.7  | 0.2389 | 3.6 | 0.99 | 1381.1 | 45.2  | 1531.6 | 29.0 | 1746.2 | 9.3   | 1746.2 | 9.3   | 79.1        |
| HB0110 - 88  | 407 | 508735 | 2.7  | 9.3452  | 0.3  | 4.7039  | 3.0  | 0.3188 | 3.0 | 0.99 | 1784.0 | 46.7  | 1767.9 | 25.3 | 1749.0 | 6.2   | 1749.0 | 6.2   | 102.0       |
| HB0110 - 13  | 696 | 852657 | 3.5  | 9.1832  | 0.3  | 4.7301  | 2.6  | 0.3150 | 2.6 | 0.99 | 1765.4 | 39.4  | 1772.6 | 21.5 | 1781.0 | 5.3   | 1781.0 | 5.3   | 99.1        |
| HB0110 - 2   | 224 | 129135 | 2.3  | 9.1806  | 0.6  | 4.6864  | 3.0  | 0.3120 | 3.0 | 0.98 | 1750.7 | 45.7  | 1764.8 | 25.4 | 1781.5 | 10.1  | 1781.5 | 10.1  | 98.3        |
| HB0110 - 6   | 115 | 79646  | 2.2  | 9.1087  | 1.2  | 4.7896  | 2.2  | 0.3164 | 1.8 | 0.83 | 1772.2 | 28.0  | 1783.1 | 18.3 | 1795.8 | 22.2  | 1795.8 | 22.2  | 98.7        |
| HB0110 - 105 | 287 | 170726 | 2.5  | 9.0723  | 0.6  | 4.8799  | 2.2  | 0.3211 | 2.2 | 0.97 | 1795.1 | 33.7  | 1798.8 | 18.8 | 1803.1 | 10.4  | 1803.1 | 10.4  | 99.6        |
| HB0110 - 7   | 531 | 332594 | 1.6  | 9.0450  | 0.3  | 4.8388  | 1.7  | 0.3174 | 1.7 | 0.98 | 1777.2 | 26.3  | 1791.7 | 14.5 | 1808.6 | 5.6   | 1808.6 | 5.6   | 98.3        |
| HB0110 - 24  | 503 | 454519 | 1.5  | 9.0423  | 0.3  | 5.1476  | 2.6  | 0.3376 | 2.5 | 0.99 | 1875.0 | 41.4  | 1844.0 | 21.8 | 1809.1 | 5.8   | 1809.1 | 5.8   | 103.6       |
| HB0110 - 54  | 242 | 127202 | 1.3  | 8.9758  | 0.6  | 4.9706  | 1.8  | 0.3236 | 1.7 | 0.94 | 1807.2 | 26.2  | 1814.3 | 14.9 | 1822.5 | 10.8  | 1822.5 | 10.8  | 99.2        |
| HB0110 - 15  | 69  | 42683  | 1.1  | 8.8445  | 1.6  | 5.0283  | 3.2  | 0.3225 | 2.8 | 0.87 | 1802.2 | 43.7  | 1824.1 | 27.0 | 1849.2 | 28.2  | 1849.2 | 28.2  | 97.5        |
| HB0110 - 99  | 314 | 442510 | 2.1  | 8.8363  | 0.3  | 4.9265  | 1.5  | 0.3157 | 1.5 | 0.97 | 1768.8 | 22.6  | 1806.8 | 12.7 | 1850.9 | 6.3   | 1850.9 | 6.3   | 95.6        |
| HB0110 - 93  | 353 | 202414 | 1.2  | 8.5136  | 0.4  | 5.7755  | 1.7  | 0.3566 | 1.7 | 0.97 | 1966.1 | 28.6  | 1942.7 | 15.0 | 1917.9 | 7.1   | 1917.9 | 7.1   | 102.5       |
| HB0110 - 101 | 182 | 217353 | 1.9  | 8.3677  | 0.6  | 5.2251  | 7.8  | 0.3171 | 7.7 | 1.00 | 1775.6 | 119.9 | 1856.7 | 66.2 | 1948.9 | 11.5  | 1948.9 | 11.5  | 91.1        |
| HB0110 - 50  | 124 | 91814  | 1.0  | 8.2094  | 0.9  | 5.8526  | 3.5  | 0.3485 | 3.4 | 0.97 | 1927.3 | 57.2  | 1954.2 | 30.8 | 1982.9 | 16.0  | 1982.9 | 16.0  | 97.2        |
| HB0110 - 8   | 144 | 108218 | 1.5  | 5.8804  | 0.4  | 10.6363 | 2.5  | 0.4536 | 2.5 | 0.99 | 2411.3 | 50.2  | 2491.9 | 23.4 | 2558.2 | 6.7   | 2558.2 | 6.7   | 94.3        |
| HB0110 - 56  | 753 | 683687 | 2.9  | 5.5715  | 0.3  | 11.2400 | 2.3  | 0.4542 | 2.3 | 0.99 | 2413.8 | 46.1  | 2543.2 | 21.6 | 2648.1 | 5.2   | 2648.1 | 5.2   | 91.2        |
| HB0110 - 42  | 214 | 129466 | 1.9  | 5.4821  | 0.4  | 12.3752 | 2.2  | 0.4920 | 2.1 | 0.99 | 2579.5 | 45.1  | 2633.3 | 20.2 | 2674.9 | 6.1   | 2674.9 | 6.1   | 96.4        |
| HB0110 - 66  | 160 | 183669 | 1.1  | 5.4109  | 0.4  | 12.8770 | 3.4  | 0.5053 | 3.4 | 0.99 | 2636.7 | 73.4  | 2670.7 | 32.2 | 2696.5 | 6.2   | 2696.5 | 6.2   | 97.8        |
| HB0110 - 3   | 106 | 90905  | 1.2  | 5.3427  | 0.4  | 13.2161 | 2.2  | 0.5121 | 2.2 | 0.98 | 2665.6 | 47.7  | 2695.2 | 21.1 | 2717.5 | 7.3   | 2717.5 | 7.3   | 98.1        |
| HB0110 - 12  | 183 | 240412 | 4.5  | 5.3384  | 0.4  | 12.8438 | 2.4  | 0.4973 | 2.3 | 0.98 | 2602.1 | 50.1  | 2668.3 | 22.4 | 2718.8 | 7.2   | 2718.8 | 7.2   | 95.7        |
| HB0110 - 40  | 50  | 47199  | 1.2  | 5.3106  | 0.7  | 13.3973 | 2.6  | 0.5160 | 2.5 | 0.96 | 2682.2 | 54.7  | 2708.1 | 24.6 | 2727.4 | 12.2  | 2727.4 | 12.2  | 98.3        |
| HB0110 - 91  | 92  | 89471  | 1.0  | 5.3106  | 0.5  | 14.0001 | 2.0  | 0.5392 | 1.9 | 0.97 | 2780.2 | 44.0  | 2749.7 | 19.0 | 2727.4 | 7.6   | 2727.4 | 7.6   | 101.9       |
| HB0110 - 77  | 200 | 202038 | 1.8  | 5.1881  | 0.3  | 14.4209 | 2.8  | 0.5426 | 2.8 | 1.00 | 2794.4 | 63.1  | 2777.8 | 26.6 | 2765.7 | 4.6   | 2765.7 | 4.6   | 101.0       |
| HB0110 - 21  | 36  | 18417  | 0.8  | 5.1194  | 3.9  | 14.4758 | 6.7  | 0.5375 | 5.4 | 0.81 | 2772.9 | 121.4 | 2781.4 | 63.3 | 2787.6 | 64.0  | 2787.6 | 64.0  | 99.5        |
| HB0110 - 70  | 380 | 241692 | 0.7  | 5.0798  | 0.2  | 13.6040 | 2.5  | 0.5012 | 2.5 | 1.00 | 2618.9 | 54.4  | 2722.5 | 24.0 | 2800.3 | 4.0   | 2800.3 | 4.0   | 93.5        |
| HB0110 - 23  | 492 | 382728 | 9.7  | 5.0270  | 1.1  | 14.7257 | 5.4  | 0.5369 | 5.3 | 0.98 | 2770.4 | 120.2 | 2797.7 | 51.8 | 2817.4 | 17.7  | 2817.4 | 17.7  | 98.3        |
| HB0110 - 9   | 11  | 11484  | 4.6  | 4.9314  | 3.0  | 15.9401 | 4.5  | 0.5701 | 3.4 | 0.74 | 2908.3 | 78.6  | 2873.2 | 43.3 | 2848.7 | 49.5  | 2848.7 | 49.5  | 102.1       |
|              |     |        |      |         |      |         |      |        |     |      |        |       |        |      |        |       |        |       |             |
| HB0210 - 23  | 130 | 37492  | 0.6  | 18.8732 | 12.2 | 0.4358  | 12.5 | 0.0596 | 2.7 | 0.22 | 373.5  | 9.9   | 367.3  | 38.6 | 328.1  | 277.9 | 373.5  | 9.9   | NA 1.4, 0.9 |
| HB0210 - 5   | 557 | 43955  | 5.5  | 18.2041 | 2.4  | 0.4803  | 4.1  | 0.0634 | 3.3 | 0.81 | 396.4  | 12.7  | 398.3  | 13.4 | 409.5  | 52.9  | 396.4  | 12.7  | NA          |
| HB0210 - 95  | 422 | 68742  | 1.6  | 18.0065 | 3.2  | 0.5009  | 4.0  | 0.0654 | 2.5 | 0.61 | 408.4  | 9.7   | 412.3  | 13.7 | 433.8  | 71.2  | 408.4  | 9.7   | NA          |
| HB0210 - 38  | 147 | 21692  | 1.3  | 18.0945 | 6.0  | 0.5203  | 9.7  | 0.0683 | 7.5 | 0.78 | 425.8  | 31.0  | 425.4  | 33.6 | 423.0  | 134.9 | 425.8  | 31.0  | NA          |
| HB0210 - 63  | 122 | 9532   | 0.7  | 17.4666 | 7.9  | 0.5410  | 9.1  | 0.0685 | 4.6 | 0.50 | 427.3  | 18.9  | 439.1  | 32.4 | 501.3  | 173.2 | 427.3  | 18.9  | NA          |
| HB0210 - 2   | 273 | 174392 | 1.5  | 17.6014 | 3.1  | 0.5774  | 5.1  | 0.0737 | 4.0 | 0.79 | 458.5  | 17.8  | 462.8  | 18.9 | 484.3  | 69.0  | 458.5  | 17.8  | NA          |
| HB0210 - 69  | 257 | 40934  | 1.3  | 16.6660 | 2.6  | 0.7722  | 2.9  | 0.0933 | 1.3 | 0.43 | 575.3  | 6.9   | 581.0  | 12.9 | 603.6  | 57.3  | 575.3  | 6.9   | 95.3        |
| HB0210 - 1   | 117 | 40852  | 10.8 | 15.5064 | 8.8  | 0.9401  | 9.3  | 0.1057 | 3.1 | 0.33 | 647.9  | 19.0  | 672.9  | 45.8 | 757.7  | 185.6 | 647.9  | 19.0  | 85.5        |
| HB0210 - 94  | 607 | 28576  | 5.4  | 14.5113 | 1.5  | 1.1705  | 2.5  | 0.1232 | 2.0 | 0.79 | 748.9  | 14.2  | 786.9  | 13.8 | 896.1  | 31.7  | 748.9  | 14.2  | 83.6        |
| HB0210 - 65  | 581 | 13376  | 0.9  | 14.1595 | 1.0  | 1.3781  | 4.8  | 0.1415 | 4.7 | 0.98 | 853.3  | 37.6  | 879.6  | 28.3 | 946.5  | 20.9  | 853.3  | 37.6  | 90.1        |
| HB0210 - 52  | 95  | 31699  | 1.0  | 14.5765 | 3.4  | 1.4256  | 4.0  | 0.1507 | 2.2 | 0.54 | 905.0  | 18.3  | 899.7  | 24.1 | 886.8  | 70.6  | 905.0  | 18.3  | 102.0       |
| HB0210 - 34  | 65  | 12211  | 2.6  | 14.4087 | 6.0  | 1.4999  | 6.9  | 0.1567 | 3.4 | 0.50 | 938.7  | 30.1  | 930.4  | 41.9 | 910.7  | 122.7 | 910.7  | 122.7 | 103.1       |
| HB0210 - 49  | 100 | 22102  | 2.4  | 14.3466 | 4.6  | 1.4741  | 5.2  | 0.1534 | 2.5 | 0.47 | 919.9  | 21.1  | 919.8  | 31.4 | 919.6  | 94.0  | 919.6  | 94.0  | 100.0       |
| HB0210 - 83  | 102 | 16420  | 1.1  | 14.0492 | 4.4  | 1.5350  | 5.0  | 0.1564 | 2.3 | 0.46 | 936.8  | 19.7  | 944.5  | 30.5 | 962.6  | 90.3  | 962.6  | 90.3  | 97.3        |
| HB0210 - 22  | 161 | 35443  | 1.6  | 13.9574 | 2.3  | 1.5748  | 3.0  | 0.1594 | 2.0 | 0.66 | 953.5  | 17.6  | 960.3  | 18.7 | 975.9  | 46.0  | 975.9  | 46.0  | 97.7        |
| HB0210 - 47  | 49  | 12128  | 2.5  | 13.9393 | 6.3  | 1.6144  | 6.9  | 0.1632 | 2.7 | 0.39 | 974.6  | 24.5  | 975.8  | 43.1 | 978.6  | 129.0 | 978.6  | 129.0 | 99.6        |
| HB0210 - 91  | 49  | 21312  | 1.0  | 13.9005 | 7.1  | 1.6679  | 7.3  | 0.1681 | 1.9 | 0.26 | 1001.9 | 17.8  | 996.4  | 46.5 | 984.2  | 144.2 | 984.2  | 144.2 | 101.8       |
| HB0210 - 40  | 159 | 43537  | 4.2  | 13.7169 | 2.5  | 1.6311  | 3.0  | 0.1623 | 1.8 | 0.58 | 969.4  | 15.8  | 982.3  | 19.2 | 1011.2 | 50.5  | 1011.2 | 50.5  | 95.9        |
| HB0210 - 46  | 196 | 54220  | 2.9  | 13.6438 | 3.4  | 1.7312  | 3.8  | 0.1713 | 1.6 | 0.42 | 1019.3 | 14.9  | 1020.2 | 24.3 | 1022.1 | 69.5  | 1022.1 | 69.5  | 99.7        |
| HB0210 - 43  | 596 | 219856 | 5.8  | 13.5474 | 0.5  | 1.7900  | 1.9  | 0.1759 | 1.8 | 0.96 | 1044.4 | 17.1  | 1041.8 | 12.1 | 1036.4 | 11.1  | 1036.4 | 11.1  | 100.8       |
| HB0210 - 79  | 752 | 461113 | 2.4  | 13.5400 | 0.5  | 1.7465  | 1.7  | 0.1715 | 1.6 | 0.96 | 1020.4 | 15.3  | 1025.9 | 10.9 | 1037.5 | 9.5   | 1037.5 | 9.5   | 98.4        |
| HB0210 - 35  | 427 | 147083 | 3.2  | 13.5289 | 0.5  | 1.7816  | 1.1  | 0.1748 | 1.0 | 0.89 | 1038.5 | 9.3   | 1038.7 | 7.1  | 1039.2 | 10.0  | 1039.2 | 10.0  | 99.9        |
| HB0210 - 96  | 198 | 45100  | 1.8  | 13.4939 | 1.6  | 1.7749  | 3.2  | 0.1737 | 2.8 | 0.86 | 1032.5 | 26.6  | 1036.3 | 21.0 | 1044.4 | 33.1  | 1044.4 | 33.1  | 98.9        |
| HB0210 - 104 | 607 | 115239 | 4.4  | 13.4772 | 0.4  | 1.8155  | 2.7  | 0.1775 | 2.7 | 0.99 | 1053.1 | 26.0  | 1051.1 | 17.7 | 1046.9 | 7.7   | 1046.9 | 7.7   | 100.6       |
| HB0210 - 97  | 312 | 39307  | 2.6  | 13.4237 | 1.2  | 1.8559  | 3.4  | 0.1807 | 3.2 | 0.94 | 1070.7 | 31.7  | 1065.5 | 22.6 | 1054.9 | 23.9  | 1054.9 | 23.9  | 101.5       |
| HB0210 - 102 | 601 | 160646 | 1.5  | 13.3912 | 0.7  | 1.8342  | 3.6  | 0.1781 | 3.6 | 0.98 | 1056.8 | 34.7  | 1057.8 | 23.8 | 1059.8 | 13.7  | 1059.8 | 13.7  | 99.7        |
| HB0210 - 66  | 130 | 27448  | 1.2  | 13.3236 | 3.5  | 1.8139  | 4.9  | 0.1753 | 3.4 | 0.70 | 1041.1 | 32.7  | 1050.5 | 31.8 | 1070.0 | 69.6  | 1070.0 | 69.6  | 97.3        |
| HB0210 - 80  | 75  | 14717  | 1.5  | 13.2952 | 6.4  | 1.9564  | 6.9  | 0.1886 | 2.7 | 0.39 | 1114.0 | 27.4  | 1100.6 | 46.6 | 1074.3 | 128.3 | 1074.3 | 128.3 | 103.7       |
| HB0210 - 73  | 247 | 89401  | 3.0  | 13.2867 | 1.7  | 1.8585  | 3.1  | 0.1791 | 2.6 | 0.85 | 1062.0 | 25.8  | 1066.5 | 20.5 | 1075.6 | 33.1  | 1      |       |             |



|              |     |          |       |         |      |         |      |        |     |      |        |      |        |      |        |       |        |       |             |
|--------------|-----|----------|-------|---------|------|---------|------|--------|-----|------|--------|------|--------|------|--------|-------|--------|-------|-------------|
| HB0210 - 70  | 242 | 206297   | 1.1   | 5.4428  | 0.5  | 12.5844 | 2.7  | 0.4968 | 2.7 | 0.99 | 2599.9 | 57.7 | 2649.1 | 25.7 | 2686.8 | 7.4   | 2686.8 | 7.4   | 96.8        |
| HB0210 - 64  | 87  | 54700    | 0.9   | 5.2965  | 0.8  | 13.5967 | 2.9  | 0.5223 | 2.8 | 0.97 | 2708.9 | 62.3 | 2722.0 | 27.6 | 2731.8 | 12.5  | 2731.8 | 12.5  | 99.2        |
| HB0210 - 76  | 229 | 164976   | 1.1   | 5.2884  | 0.2  | 13.7224 | 1.7  | 0.5263 | 1.7 | 0.99 | 2725.9 | 37.8 | 2730.7 | 16.2 | 2734.3 | 3.7   | 2734.3 | 3.7   | 99.7        |
| HB0210 - 99  | 174 | 114673   | 2.5   | 5.1943  | 0.3  | 13.8271 | 1.6  | 0.5209 | 1.5 | 0.98 | 2703.0 | 34.2 | 2737.9 | 15.0 | 2763.8 | 5.0   | 2763.8 | 5.0   | 97.8        |
| HB0210 - 105 | 71  | 77963    | 1.2   | 4.7687  | 0.7  | 15.9213 | 2.1  | 0.5507 | 2.0 | 0.95 | 2827.9 | 44.8 | 2872.1 | 19.7 | 2903.2 | 10.6  | 2903.2 | 10.6  | 97.4        |
| HB0210 - 41  | 213 | 379565   | 1.7   | 4.5621  | 0.2  | 17.6265 | 1.3  | 0.5832 | 1.3 | 0.98 | 2961.9 | 30.5 | 2969.6 | 12.5 | 2974.8 | 3.8   | 2974.8 | 3.8   | 99.6        |
| HB0210 - 44  | 58  | 46751    | 1.0   | 4.0530  | 0.7  | 21.4449 | 1.6  | 0.6304 | 1.4 | 0.89 | 3151.1 | 34.5 | 3158.9 | 15.1 | 3163.9 | 11.2  | 3163.9 | 11.2  | 99.6        |
|              |     |          |       |         |      |         |      |        |     |      |        |      |        |      |        |       |        |       |             |
| BR0110-84    | 80  | 11607    | 1.4   | 18.0977 | 10.1 | 0.4780  | 11.0 | 0.0627 | 4.4 | 0.40 | 392.3  | 16.9 | 396.7  | 36.3 | 422.6  | 226.0 | 392.3  | 16.9  | NA 1.5, 0.9 |
| BR0110-89    | 306 | 14770    | 1.6   | 17.0127 | 7.6  | 0.5138  | 12.1 | 0.0634 | 9.4 | 0.78 | 396.3  | 36.2 | 421.0  | 41.7 | 558.9  | 165.6 | 396.3  | 36.2  | NA          |
| BR0110-75    | 258 | 13349    | 2.1   | 18.5179 | 6.0  | 0.4820  | 6.1  | 0.0647 | 1.1 | 0.18 | 404.3  | 4.4  | 399.4  | 20.1 | 371.1  | 135.0 | 404.3  | 4.4   | NA          |
| BR0110-21    | 184 | 20299    | 0.9   | 18.1618 | 6.6  | 0.4958  | 7.0  | 0.0653 | 2.5 | 0.35 | 407.8  | 9.8  | 408.8  | 23.7 | 414.7  | 147.2 | 407.8  | 9.8   | NA          |
| BR0110-13    | 137 | 7493     | 1.1   | 17.2084 | 7.9  | 0.5322  | 8.3  | 0.0664 | 2.5 | 0.30 | 414.6  | 9.9  | 433.3  | 29.3 | 534.0  | 174.1 | 414.6  | 9.9   | NA          |
| BR0110-66    | 124 | 13900    | 1.6   | 18.0872 | 4.9  | 0.5083  | 7.4  | 0.0667 | 5.6 | 0.75 | 416.1  | 22.4 | 417.3  | 25.3 | 423.9  | 108.6 | 416.1  | 22.4  | NA          |
| BR0110-65    | 372 | 48236    | 3.4   | 18.0923 | 3.4  | 0.5364  | 4.0  | 0.0704 | 2.0 | 0.50 | 438.5  | 8.4  | 436.1  | 14.0 | 423.2  | 76.5  | 438.5  | 8.4   | NA          |
| BR0110-5     | 492 | 49798    | 1.5   | 17.7687 | 2.0  | 0.5545  | 3.0  | 0.0715 | 2.3 | 0.76 | 444.9  | 10.0 | 447.9  | 11.0 | 463.4  | 43.9  | 444.9  | 10.0  | NA          |
| BR0110-55    | 208 | 25546    | 1.7   | 17.7603 | 3.0  | 0.5679  | 3.6  | 0.0731 | 2.0 | 0.54 | 455.1  | 8.7  | 456.6  | 13.4 | 464.4  | 67.5  | 455.1  | 8.7   | NA          |
| BR0110-92    | 515 | 44891    | 3.2   | 17.4714 | 2.5  | 0.6085  | 3.6  | 0.0771 | 2.6 | 0.72 | 478.8  | 11.9 | 482.6  | 13.8 | 500.7  | 54.6  | 478.8  | 11.9  | NA          |
| BR0110-16    | 163 | 33943    | 2.5   | 15.6819 | 2.8  | 1.0177  | 3.5  | 0.1158 | 2.2 | 0.62 | 706.1  | 14.8 | 712.8  | 18.1 | 734.0  | 58.5  | 706.1  | 14.8  | 96.2        |
| BR0110-58    | 132 | 22174    | 2.1   | 13.9416 | 3.6  | 1.7747  | 5.3  | 0.1794 | 3.9 | 0.74 | 1064.0 | 38.5 | 1036.2 | 34.6 | 978.2  | 73.2  | 978.2  | 73.2  | 108.8       |
| BR0110-34    | 69  | 30927    | 2.2   | 13.8869 | 4.9  | 1.5745  | 5.7  | 0.1586 | 2.9 | 0.51 | 948.9  | 25.8 | 960.2  | 35.6 | 986.2  | 100.3 | 986.2  | 100.3 | 96.2        |
| BR0110-23    | 485 | 211607   | 107.8 | 13.8055 | 0.9  | 1.5659  | 4.3  | 0.1568 | 4.2 | 0.98 | 938.9  | 36.9 | 956.8  | 26.8 | 998.2  | 18.7  | 998.2  | 18.7  | 94.1        |
| BR0110-71    | 82  | 21337    | 0.9   | 13.5554 | 4.2  | 1.7310  | 4.7  | 0.1702 | 2.2 | 0.47 | 1013.1 | 20.6 | 1020.1 | 30.4 | 1035.2 | 84.4  | 1035.2 | 84.4  | 97.9        |
| BR0110-96    | 931 | 242965   | 3.2   | 13.5494 | 0.2  | 1.8034  | 2.0  | 0.1772 | 2.0 | 1.00 | 1051.7 | 19.3 | 1046.7 | 13.1 | 1036.1 | 4.0   | 1036.1 | 4.0   | 101.5       |
| BR0110-39    | 304 | 45737    | 2.9   | 13.4986 | 0.8  | 1.5702  | 2.6  | 0.1537 | 2.4 | 0.95 | 921.8  | 20.8 | 958.5  | 15.9 | 1043.7 | 16.8  | 1043.7 | 16.8  | 88.3        |
| BR0110-4     | 259 | 80058    | 3.4   | 13.2978 | 1.2  | 1.8247  | 1.4  | 0.1760 | 0.8 | 0.53 | 1045.0 | 7.3  | 1054.4 | 9.3  | 1073.9 | 24.2  | 1073.9 | 24.2  | 97.3        |
| BR0110-76    | 213 | 45889    | 2.3   | 13.2887 | 1.8  | 1.9460  | 2.9  | 0.1876 | 2.3 | 0.79 | 1108.1 | 23.4 | 1097.1 | 19.5 | 1075.3 | 35.9  | 1075.3 | 35.9  | 103.1       |
| BR0110-95    | 248 | 88870    | 1.8   | 13.2586 | 1.0  | 1.8338  | 2.8  | 0.1763 | 2.6 | 0.93 | 1046.9 | 25.4 | 1057.6 | 18.6 | 1079.8 | 20.9  | 1079.8 | 20.9  | 97.0        |
| BR0110-1     | 162 | 49562    | 0.9   | 13.2298 | 2.1  | 1.7637  | 2.4  | 0.1692 | 1.1 | 0.44 | 1007.9 | 9.8  | 1032.2 | 15.5 | 1084.2 | 43.0  | 1084.2 | 43.0  | 93.0        |
| BR0110-76    | 220 | 96304    | 2.1   | 13.1448 | 1.3  | 1.8438  | 2.6  | 0.1758 | 2.2 | 0.85 | 1043.9 | 21.0 | 1061.2 | 16.8 | 1097.1 | 26.7  | 1097.1 | 26.7  | 95.2        |
| BR0110-37    | 192 | 59485    | 3.5   | 13.0571 | 1.1  | 1.8024  | 1.4  | 0.1707 | 0.9 | 0.62 | 1015.9 | 8.5  | 1046.3 | 9.5  | 1110.4 | 22.6  | 1110.4 | 22.6  | 91.5        |
| BR0110-98    | 142 | 28189    | 2.3   | 12.8925 | 2.1  | 2.1227  | 2.5  | 0.1985 | 1.4 | 0.57 | 1167.2 | 15.2 | 1156.2 | 17.3 | 1135.7 | 40.9  | 1135.7 | 40.9  | 102.8       |
| BR0110-60    | 218 | 36709    | 2.5   | 12.8854 | 1.1  | 2.1308  | 2.5  | 0.1991 | 2.3 | 0.91 | 1170.7 | 24.7 | 1158.8 | 17.6 | 1136.9 | 21.1  | 1136.9 | 21.1  | 103.0       |
| BR0110-24    | 110 | 27114    | 2.6   | 12.8093 | 2.3  | 2.0382  | 4.4  | 0.1894 | 3.7 | 0.85 | 1117.9 | 38.0 | 1128.4 | 29.7 | 1148.6 | 45.8  | 1148.6 | 45.8  | 97.3        |
| BR0110-29    | 103 | 9539     | 2.0   | 12.7511 | 1.8  | 2.0914  | 2.3  | 0.1934 | 1.5 | 0.64 | 1139.8 | 15.3 | 1146.0 | 15.7 | 1157.6 | 34.8  | 1157.6 | 34.8  | 98.5        |
| BR0110-99    | 73  | 15800    | 1.6   | 12.7395 | 6.8  | 2.0612  | 7.1  | 0.1904 | 1.9 | 0.27 | 1123.8 | 20.1 | 1136.0 | 48.6 | 1159.4 | 135.6 | 1159.4 | 135.6 | 96.9        |
| BR0110-11    | 227 | 58452    | 4.1   | 12.5141 | 1.6  | 2.2535  | 4.1  | 0.2045 | 3.7 | 0.92 | 1199.6 | 40.7 | 1197.9 | 28.5 | 1194.8 | 31.5  | 1194.8 | 31.5  | 100.4       |
| BR0110-68    | 411 | 109543   | 2.3   | 12.2818 | 0.6  | 2.2569  | 1.6  | 0.2010 | 1.5 | 0.92 | 1180.9 | 16.3 | 1198.9 | 11.5 | 1231.7 | 12.5  | 1231.7 | 12.5  | 95.9        |
| BR0110-33    | 61  | 17752    | 1.6   | 12.0959 | 2.7  | 2.4192  | 3.4  | 0.2122 | 2.1 | 0.60 | 1240.7 | 23.2 | 1248.3 | 24.6 | 1261.5 | 53.3  | 1261.5 | 53.3  | 98.4        |
| BR0110-104   | 404 | 134800   | 3.0   | 11.9834 | 0.6  | 2.5010  | 3.4  | 0.2174 | 3.4 | 0.98 | 1268.0 | 38.9 | 1272.3 | 24.9 | 1279.7 | 12.5  | 1279.7 | 12.5  | 99.1        |
| BR0110-27    | 496 | 196558   | 3.7   | 11.7841 | 0.3  | 2.5013  | 2.0  | 0.2138 | 2.0 | 0.99 | 1248.9 | 22.9 | 1272.4 | 14.8 | 1312.3 | 5.4   | 1312.3 | 5.4   | 95.2        |
| BR0110-78    | 294 | 82670    | 2.5   | 11.2819 | 0.7  | 2.8569  | 3.0  | 0.2338 | 2.9 | 0.97 | 1354.2 | 35.4 | 1370.6 | 22.5 | 1396.3 | 14.4  | 1396.3 | 14.4  | 97.0        |
| BR0110-62    | 370 | 181903   | 1.5   | 11.2781 | 0.6  | 2.8938  | 1.7  | 0.2367 | 1.5 | 0.93 | 1369.5 | 19.0 | 1380.3 | 12.5 | 1397.0 | 11.8  | 1397.0 | 11.8  | 98.0        |
| BR0110-48    | 152 | 80436    | 2.6   | 11.2721 | 1.2  | 2.9511  | 2.8  | 0.2413 | 2.5 | 0.90 | 1393.2 | 31.7 | 1395.1 | 21.3 | 1398.0 | 23.2  | 1398.0 | 23.2  | 99.7        |
| BR0110-52    | 174 | 45628    | 1.9   | 11.0413 | 0.9  | 3.0200  | 1.5  | 0.2418 | 1.2 | 0.82 | 1396.3 | 15.5 | 1412.7 | 11.5 | 1437.5 | 16.3  | 1437.5 | 16.3  | 97.1        |
| BR0110-44    | 186 | 80677    | 1.7   | 10.9727 | 0.7  | 3.2704  | 1.7  | 0.2603 | 1.5 | 0.90 | 1491.2 | 20.4 | 1474.0 | 13.3 | 1449.4 | 14.2  | 1449.4 | 14.2  | 102.9       |
| BR0110-74    | 341 | 61088    | 1.9   | 10.7405 | 0.4  | 3.2127  | 2.0  | 0.2503 | 1.9 | 0.98 | 1439.8 | 24.9 | 1460.2 | 15.2 | 1490.0 | 7.5   | 1490.0 | 7.5   | 96.6        |
| BR0110-46    | 492 | 363631   | 2.5   | 10.6538 | 0.4  | 3.4306  | 1.9  | 0.2651 | 1.9 | 0.97 | 1515.8 | 25.3 | 1511.4 | 15.2 | 1505.3 | 8.5   | 1505.3 | 8.5   | 100.7       |
| BR0110-102   | 88  | 62945    | 2.1   | 10.6269 | 2.0  | 3.1576  | 5.1  | 0.2434 | 4.7 | 0.92 | 1404.2 | 59.3 | 1446.9 | 39.4 | 1510.1 | 37.7  | 1510.1 | 37.7  | 93.0        |
| BR0110-54    | 280 | 101282   | 1.9   | 10.5212 | 0.3  | 3.3721  | 2.1  | 0.2573 | 2.1 | 0.99 | 1476.1 | 27.8 | 1497.9 | 16.7 | 1529.0 | 5.4   | 1529.0 | 5.4   | 96.5        |
| BR0110-57    | 110 | 71927    | 2.4   | 10.2549 | 1.0  | 3.7114  | 2.2  | 0.2760 | 1.9 | 0.88 | 1571.4 | 26.8 | 1573.8 | 17.5 | 1577.1 | 19.4  | 1577.1 | 19.4  | 99.6        |
| BR0110-31    | 140 | 73541    | 2.6   | 9.9628  | 1.0  | 3.9674  | 2.9  | 0.2867 | 2.7 | 0.94 | 1624.9 | 39.2 | 1627.6 | 23.5 | 1631.0 | 18.2  | 1631.0 | 18.2  | 99.6        |
| BR0110-22    | 131 | 32028    | 1.0   | 9.9353  | 1.0  | 3.8837  | 2.8  | 0.2798 | 2.6 | 0.94 | 1590.6 | 37.1 | 1610.3 | 22.7 | 1636.1 | 18.2  | 1636.1 | 18.2  | 97.2        |
| BR0110-32    | 259 | 110404   | 10.1  | 9.9194  | 0.9  | 3.9467  | 2.4  | 0.2839 | 2.2 | 0.92 | 1611.2 | 31.0 | 1623.3 | 19.1 | 1639.1 | 17.1  | 1639.1 | 17.1  | 98.3        |
| BR0110-45    | 86  | 46257    | 1.2   | 9.8784  | 1.5  | 3.8697  | 1.8  | 0.2772 | 1.0 | 0.58 | 1577.5 | 14.7 | 1607.4 | 14.6 | 1646.8 | 27.3  | 1646.8 | 27.3  | 95.8        |
| BR0110-81    | 162 | 94106    | 2.3   | 9.8546  | 0.7  | 3.9471  | 1.8  | 0.2821 | 1.7 | 0.92 | 1602.0 | 24.0 | 1623.4 | 14.8 | 1651.3 | 13.1  | 1651.3 | 13.1  | 97.0        |
| BR0110-87    | 132 | 50326    | 1.5   | 9.8293  | 0.8  | 4.0576  | 2.0  | 0.2893 | 1.9 | 0.93 | 1637.8 | 27.5 | 1645.8 | 16.7 | 1656.0 | 14.2  | 1656.0 | 14.2  | 98.9        |
| BR0110-53    | 203 | 127825   | 1.1   | 9.8210  | 0.9  | 3.9708  | 2.7  | 0.2828 | 2.6 | 0.95 | 1605.6 | 36.8 | 1628.2 | 22.2 | 1657.6 | 16.2  | 1657.6 | 16.2  | 96.9        |
| BR0110-73    | 267 | 117123   | 1.1   | 9.8123  | 0.5  | 4.0187  | 1.3  | 0.2860 | 1.2 | 0.93 | 1621.5 | 17.8 | 1638.0 | 10.9 | 1659.2 | 9.4   | 1659.2 | 9.4   | 97.7        |
| BR0110-80    | 245 | 74705    | 1.4   | 9.7681  | 0.4  | 4.0501  | 2.4  | 0.2869 | 2.4 | 0.99 | 1626.2 | 34.6 | 1644.3 | 19.9 | 1667.6 | 7.8   | 1667.6 | 7.8   | 97.5        |
| BR0110-94    | 72  | 17960    | 1.2   | 9.7492  | 2.5  | 3.4142  | 4.4  | 0.2414 | 3.6 | 0.82 | 1394.0 | 45.5 | 1507.7 | 34.7 | 1671.2 | 46.7  | 1671.2 | 46.7  | 83.4        |
| BR0110-67    | 210 | 80178    | 1.6   | 9.7403  | 0.5  | 4.3515  | 1.1  | 0.3074 | 1.0 | 0.89 | 1727.9 | 15.5 | 1703.2 | 9.5  | 1672.9 | 9.6   | 1672.9 | 9.6   | 103.3       |
| BR0110-61    | 349 | 361313   | 2.0   | 9.7108  | 0.3  | 4.1753  | 2.5  | 0.2941 | 2.5 | 0.99 | 1661.8 | 36.4 | 1669.2 | 20.5 | 1678.5 | 5.4   | 1678.5 | 5.4   | 99.0        |
| BR0110-97    | 358 | 125658</ |       |         |      |         |      |        |     |      |        |      |        |      |        |       |        |       |             |



|              |      |        |      |         |     |         |     |        |     |      |        |       |        |      |        |       |        |       |       |
|--------------|------|--------|------|---------|-----|---------|-----|--------|-----|------|--------|-------|--------|------|--------|-------|--------|-------|-------|
| MH0210 - 69  | 96   | 10642  | 1.6  | 18.8577 | 9.1 | 0.5160  | 9.5 | 0.0706 | 2.7 | 0.28 | 439.6  | 11.3  | 422.5  | 32.9 | 330.0  | 207.9 | 439.6  | 11.3  | NA    |
| MH0210 - 44  | 237  | 39399  | 1.6  | 17.9309 | 1.8 | 0.5438  | 2.4 | 0.0707 | 1.6 | 0.66 | 440.5  | 6.8   | 440.9  | 8.6  | 443.2  | 40.4  | 440.5  | 6.8   | NA    |
| MH0210 - 71  | 84   | 15142  | 2.5  | 18.3628 | 5.7 | 0.5476  | 8.1 | 0.0729 | 5.7 | 0.70 | 453.8  | 25.0  | 443.4  | 29.1 | 390.0  | 129.1 | 453.8  | 25.0  | NA    |
| MH0210 - 87  | 169  | 75280  | 1.5  | 17.4003 | 3.5 | 0.6699  | 4.6 | 0.0845 | 3.0 | 0.64 | 523.2  | 15.0  | 520.7  | 18.9 | 509.6  | 78.1  | 523.2  | 15.0  | 102.7 |
| MH0210 - 1   | 132  | 21015  | 1.2  | 16.8073 | 2.5 | 0.7006  | 4.3 | 0.0854 | 3.5 | 0.82 | 528.3  | 17.8  | 539.1  | 17.9 | 585.4  | 53.3  | 528.3  | 17.8  | 90.2  |
| MH0210 - 4   | 183  | 54734  | 1.6  | 16.9832 | 2.4 | 0.7452  | 3.7 | 0.0918 | 2.8 | 0.76 | 566.1  | 15.2  | 565.4  | 16.0 | 562.7  | 52.1  | 566.1  | 15.2  | 100.6 |
| MH0210 - 45  | 76   | 16936  | 0.9  | 16.1518 | 5.2 | 0.9779  | 5.4 | 0.1146 | 1.5 | 0.28 | 699.2  | 9.8   | 692.5  | 27.0 | 671.1  | 110.7 | 699.2  | 9.8   | 104.2 |
| MH0210 - 77  | 82   | 36037  | 0.9  | 14.2066 | 2.9 | 1.5029  | 4.1 | 0.1548 | 2.9 | 0.70 | 928.1  | 24.9  | 931.5  | 25.1 | 939.7  | 60.2  | 939.7  | 60.2  | 98.8  |
| MH0210 - 24  | 236  | 192596 | 2.8  | 13.9366 | 1.6 | 1.6665  | 2.6 | 0.1684 | 2.1 | 0.79 | 1003.5 | 19.5  | 995.9  | 16.8 | 978.9  | 32.8  | 978.9  | 32.8  | 102.5 |
| MH0210 - 72  | 271  | 126884 | 52.8 | 13.5769 | 1.1 | 1.7799  | 2.0 | 0.1753 | 1.7 | 0.84 | 1041.0 | 16.3  | 1038.1 | 13.1 | 1032.0 | 22.1  | 1032.0 | 22.1  | 100.9 |
| MH0210 - 94  | 74   | 9712   | 1.7  | 13.4958 | 5.3 | 1.6650  | 5.8 | 0.1630 | 2.3 | 0.39 | 973.3  | 20.5  | 995.3  | 36.6 | 1044.1 | 107.1 | 1044.1 | 107.1 | 93.2  |
| MH0210 - 66  | 211  | 108649 | 4.6  | 13.4301 | 1.5 | 1.8045  | 2.3 | 0.1758 | 1.7 | 0.75 | 1043.8 | 16.8  | 1047.1 | 15.1 | 1054.0 | 30.8  | 1054.0 | 30.8  | 99.0  |
| MH0210 - 53  | 74   | 37659  | 3.5  | 13.3816 | 2.0 | 1.8154  | 3.7 | 0.1762 | 3.1 | 0.84 | 1046.1 | 29.7  | 1051.0 | 24.0 | 1061.3 | 40.3  | 1061.3 | 40.3  | 98.6  |
| MH0210 - 20  | 355  | 255284 | 1.9  | 13.3132 | 0.9 | 1.8192  | 3.4 | 0.1757 | 3.3 | 0.97 | 1043.2 | 31.7  | 1052.4 | 22.3 | 1071.6 | 17.2  | 1071.6 | 17.2  | 97.4  |
| MH0210 - 36  | 485  | 308613 | 3.4  | 13.2863 | 0.6 | 1.9065  | 2.3 | 0.1837 | 2.2 | 0.96 | 1087.2 | 21.8  | 1083.4 | 15.1 | 1075.6 | 13.0  | 1075.6 | 13.0  | 101.1 |
| MH0210 - 6   | 36   | 24968  | 1.7  | 13.2597 | 3.3 | 1.8559  | 5.1 | 0.1785 | 3.9 | 0.76 | 1058.6 | 37.9  | 1065.5 | 33.7 | 1079.6 | 66.5  | 1079.6 | 66.5  | 98.1  |
| MH0210 - 29  | 280  | 22691  | 5.0  | 13.1737 | 0.6 | 1.8898  | 5.8 | 0.1806 | 5.8 | 0.99 | 1070.0 | 56.8  | 1077.5 | 38.5 | 1092.7 | 12.2  | 1092.7 | 12.2  | 97.9  |
| MH0210 - 88  | 122  | 66419  | 1.0  | 13.1417 | 1.9 | 1.9220  | 4.5 | 0.1832 | 4.1 | 0.91 | 1084.4 | 40.5  | 1088.7 | 29.9 | 1097.5 | 37.4  | 1097.5 | 37.4  | 98.8  |
| MH0210 - 59  | 144  | 54755  | 2.8  | 12.9248 | 1.5 | 2.1016  | 2.3 | 0.1970 | 1.7 | 0.75 | 1159.2 | 18.4  | 1149.3 | 15.9 | 1130.7 | 30.2  | 1130.7 | 30.2  | 102.5 |
| MH0210 - 95  | 131  | 54179  | 2.8  | 12.7026 | 1.9 | 2.1403  | 3.3 | 0.1972 | 2.7 | 0.82 | 1160.1 | 29.2  | 1161.9 | 23.1 | 1165.2 | 37.4  | 1165.2 | 37.4  | 99.6  |
| MH0210 - 10  | 126  | 16270  | 2.2  | 12.5691 | 1.4 | 2.2883  | 5.2 | 0.2086 | 5.0 | 0.96 | 1221.4 | 55.5  | 1208.7 | 36.7 | 1186.1 | 28.6  | 1186.1 | 28.6  | 103.0 |
| MH0210 - 63  | 144  | 101953 | 0.7  | 12.3586 | 1.5 | 2.3875  | 2.4 | 0.2140 | 1.8 | 0.78 | 1250.1 | 20.9  | 1238.8 | 16.8 | 1219.4 | 28.8  | 1219.4 | 28.8  | 102.5 |
| MH0210 - 2   | 144  | 67334  | 2.7  | 12.2848 | 1.2 | 2.2158  | 3.1 | 0.1974 | 2.9 | 0.92 | 1161.5 | 30.6  | 1186.1 | 21.9 | 1231.2 | 24.3  | 1231.2 | 24.3  | 94.3  |
| MH0210 - 65  | 87   | 154181 | 2.2  | 12.2485 | 2.6 | 2.3493  | 3.0 | 0.2087 | 1.5 | 0.49 | 1221.9 | 16.2  | 1227.3 | 21.0 | 1237.0 | 50.3  | 1237.0 | 50.3  | 98.8  |
| MH0210 - 7   | 249  | 133088 | 3.8  | 12.1979 | 0.7 | 2.4499  | 2.0 | 0.2167 | 1.9 | 0.93 | 1264.6 | 21.9  | 1257.4 | 14.8 | 1245.0 | 14.5  | 1245.0 | 14.5  | 101.6 |
| MH0210 - 47  | 699  | 19216  | 2.5  | 11.6965 | 0.8 | 2.3628  | 2.3 | 0.2004 | 2.1 | 0.94 | 1177.7 | 22.8  | 1231.4 | 16.1 | 1326.8 | 15.2  | 1326.8 | 15.2  | 88.8  |
| MH0210 - 38  | 244  | 152743 | 2.4  | 11.4931 | 1.4 | 2.4932  | 4.9 | 0.2078 | 4.7 | 0.96 | 1217.2 | 51.7  | 1270.1 | 35.3 | 1360.7 | 26.7  | 1360.7 | 26.7  | 89.5  |
| MH0210 - 105 | 98   | 59110  | 1.2  | 11.4190 | 1.4 | 2.8809  | 2.0 | 0.2386 | 1.5 | 0.73 | 1379.4 | 18.2  | 1376.9 | 15.1 | 1373.1 | 26.1  | 1373.1 | 26.1  | 100.5 |
| MH0210 - 40  | 131  | 95231  | 2.4  | 11.3197 | 1.7 | 2.9920  | 2.7 | 0.2456 | 2.2 | 0.79 | 1416.0 | 27.3  | 1405.6 | 20.7 | 1389.9 | 31.9  | 1389.9 | 31.9  | 101.9 |
| MH0210 - 9   | 782  | 32022  | 3.7  | 11.1198 | 0.5 | 3.0276  | 4.6 | 0.2442 | 4.5 | 0.99 | 1408.3 | 57.2  | 1414.6 | 34.8 | 1424.0 | 10.2  | 1424.0 | 10.2  | 98.9  |
| MH0210 - 34  | 211  | 152789 | 2.4  | 11.0995 | 0.9 | 3.0843  | 2.4 | 0.2483 | 2.3 | 0.93 | 1429.6 | 29.2  | 1428.8 | 18.7 | 1427.5 | 16.8  | 1427.5 | 16.8  | 100.2 |
| MH0210 - 28  | 214  | 161727 | 2.4  | 11.0879 | 0.5 | 3.0713  | 3.3 | 0.2470 | 3.2 | 0.99 | 1422.9 | 41.3  | 1425.6 | 25.1 | 1429.5 | 9.7   | 1429.5 | 9.7   | 99.5  |
| MH0210 - 68  | 92   | 91034  | 1.1  | 11.0285 | 1.2 | 3.0840  | 2.1 | 0.2467 | 1.8 | 0.82 | 1421.3 | 22.3  | 1428.7 | 16.4 | 1439.8 | 23.2  | 1439.8 | 23.2  | 98.7  |
| MH0210 - 76  | 204  | 320957 | 2.2  | 11.0192 | 0.7 | 3.1202  | 2.4 | 0.2494 | 2.3 | 0.96 | 1435.2 | 30.0  | 1437.7 | 18.7 | 1441.4 | 13.1  | 1441.4 | 13.1  | 99.6  |
| MH0210 - 19  | 1023 | 13342  | 2.8  | 10.9926 | 0.5 | 2.6002  | 2.6 | 0.2073 | 2.6 | 0.98 | 1214.4 | 28.4  | 1300.7 | 19.2 | 1446.0 | 10.2  | 1446.0 | 10.2  | 84.0  |
| MH0210 - 39  | 130  | 40648  | 2.0  | 10.9924 | 1.6 | 3.0908  | 2.6 | 0.2464 | 2.1 | 0.79 | 1420.0 | 26.6  | 1430.4 | 20.2 | 1446.0 | 30.7  | 1446.0 | 30.7  | 98.2  |
| MH0210 - 21  | 156  | 102968 | 2.1  | 10.9733 | 1.3 | 3.1858  | 2.1 | 0.2535 | 1.6 | 0.78 | 1456.7 | 21.0  | 1453.7 | 15.9 | 1449.3 | 24.3  | 1449.3 | 24.3  | 100.5 |
| MH0210 - 84  | 244  | 131389 | 2.3  | 10.9581 | 0.6 | 3.2613  | 1.6 | 0.2592 | 1.5 | 0.93 | 1485.7 | 19.5  | 1471.9 | 12.3 | 1451.9 | 11.2  | 1451.9 | 11.2  | 102.3 |
| MH0210 - 51  | 158  | 73231  | 2.2  | 10.9381 | 3.9 | 3.2110  | 8.8 | 0.2547 | 7.9 | 0.90 | 1462.8 | 103.4 | 1459.8 | 68.3 | 1455.4 | 74.3  | 1455.4 | 74.3  | 100.5 |
| MH0210 - 96  | 98   | 20919  | 1.5  | 10.8476 | 1.4 | 3.1784  | 3.5 | 0.2501 | 3.2 | 0.92 | 1438.8 | 41.5  | 1451.9 | 27.1 | 1471.2 | 26.8  | 1471.2 | 26.8  | 97.8  |
| MH0210 - 79  | 156  | 127933 | 1.8  | 10.8039 | 0.7 | 3.3382  | 3.0 | 0.2616 | 2.9 | 0.97 | 1497.9 | 38.8  | 1490.0 | 23.3 | 1478.9 | 13.1  | 1478.9 | 13.1  | 101.3 |
| MH0210 - 85  | 52   | 54806  | 1.1  | 10.7845 | 1.9 | 3.2149  | 4.4 | 0.2515 | 4.0 | 0.91 | 1446.0 | 52.0  | 1460.8 | 34.3 | 1482.3 | 35.4  | 1482.3 | 35.4  | 97.6  |
| MH0210 - 73  | 181  | 89820  | 1.1  | 10.7793 | 0.7 | 3.4664  | 2.9 | 0.2710 | 2.8 | 0.97 | 1545.9 | 38.2  | 1519.6 | 22.6 | 1483.2 | 13.0  | 1483.2 | 13.0  | 104.2 |
| MH0210 - 30  | 582  | 502877 | 10.5 | 10.5920 | 0.4 | 3.3590  | 4.5 | 0.2580 | 4.5 | 1.00 | 1479.8 | 58.9  | 1494.9 | 35.0 | 1516.3 | 8.4   | 1516.3 | 8.4   | 97.6  |
| MH0210 - 13  | 255  | 7816   | 1.3  | 9.9622  | 0.6 | 3.0204  | 4.6 | 0.2182 | 4.5 | 0.99 | 1272.5 | 52.3  | 1412.8 | 34.9 | 1631.1 | 11.3  | 1631.1 | 11.3  | 78.0  |
| MH0210 - 57  | 193  | 196112 | 1.8  | 9.8911  | 0.6 | 4.1656  | 4.7 | 0.2988 | 4.6 | 0.99 | 1685.5 | 68.7  | 1667.3 | 38.2 | 1644.4 | 10.8  | 1644.4 | 10.8  | 102.5 |
| MH0210 - 81  | 132  | 97180  | 1.5  | 9.8110  | 0.8 | 4.0173  | 1.4 | 0.2859 | 1.1 | 0.79 | 1620.8 | 15.3  | 1637.7 | 11.0 | 1659.5 | 15.4  | 1659.5 | 15.4  | 97.7  |
| MH0210 - 23  | 42   | 28114  | 2.1  | 9.7926  | 3.6 | 4.1202  | 4.6 | 0.2926 | 2.8 | 0.60 | 1654.7 | 40.4  | 1658.3 | 37.4 | 1663.0 | 67.5  | 1663.0 | 67.5  | 99.5  |
| MH0210 - 90  | 175  | 28022  | 2.1  | 9.7732  | 0.9 | 4.1903  | 3.1 | 0.2970 | 2.9 | 0.96 | 1676.5 | 43.3  | 1672.1 | 25.0 | 1666.6 | 15.8  | 1666.6 | 15.8  | 100.6 |
| MH0210 - 104 | 130  | 115488 | 1.4  | 9.6463  | 0.9 | 4.3172  | 1.6 | 0.3020 | 1.3 | 0.82 | 1701.4 | 20.2  | 1696.6 | 13.6 | 1690.8 | 17.4  | 1690.8 | 17.4  | 100.6 |
| MH0210 - 101 | 176  | 177231 | 4.7  | 9.5383  | 0.5 | 4.2329  | 1.6 | 0.2928 | 1.5 | 0.96 | 1655.6 | 22.2  | 1680.4 | 13.1 | 1711.5 | 8.6   | 1711.5 | 8.6   | 96.7  |
| MH0210 - 75  | 233  | 123802 | 3.7  | 9.4587  | 0.7 | 4.5999  | 3.5 | 0.3156 | 3.4 | 0.98 | 1768.0 | 52.6  | 1749.3 | 29.0 | 1726.9 | 13.5  | 1726.9 | 13.5  | 102.4 |
| MH0210 - 58  | 363  | 477777 | 3.9  | 9.3881  | 0.4 | 4.5800  | 2.5 | 0.3118 | 2.5 | 0.99 | 1749.8 | 37.8  | 1745.6 | 20.8 | 1740.6 | 6.8   | 1740.6 | 6.8   | 100.5 |
| MH0210 - 102 | 758  | 650395 | 2.7  | 9.3459  | 0.2 | 4.7875  | 2.1 | 0.3245 | 2.1 | 1.00 | 1811.7 | 33.8  | 1782.7 | 18.0 | 1748.9 | 2.8   | 1748.9 | 2.8   | 103.6 |
| MH0210 - 1   | 201  | 101787 | 1.6  | 9.2482  | 1.0 | 4.6835  | 3.5 | 0.3141 | 3.4 | 0.96 | 1761.0 | 51.6  | 1764.3 | 29.3 | 1768.1 | 18.1  | 1768.1 | 18.1  | 99.6  |
| MH0210 - 100 | 70   | 46724  | 0.9  | 9.0291  | 1.2 | 4.8612  | 1.9 | 0.3183 | 1.5 | 0.77 | 1781.6 | 23.3  | 1795.6 | 16.3 | 1811.8 | 22.5  | 1811.8 | 22.5  | 98.3  |
| MH0210 - 93  | 136  | 50286  | 2.0  | 8.8760  | 0.7 | 4.9476  | 2.5 | 0.3185 | 2.4 | 0.97 | 1782.4 | 37.6  | 1810.4 | 21.1 | 1842.8 | 11.8  | 1842.8 | 11.8  | 96.7  |
| MH0210 - 50  | 130  | 111368 | 1.5  | 8.8150  | 0.6 | 5.1831  | 1.7 | 0.3314 | 1.6 | 0.93 | 1845.0 | 25.0  | 1849.8 | 14.3 | 1855.3 | 11.3  | 1855.3 | 11.3  | 99.4  |
| MH0210 - 33  | 233  | 131191 | 3.1  | 8.5314  | 0.6 | 5.6310  | 2.4 | 0.3484 | 2.4 | 0.97 | 1927.1 | 39.6  | 1920.9 | 21.1 | 1914.2 | 10.0  | 1914.2 | 10.0  | 100.7 |
| MH0210 - 46  | 13   | 15967  | 1.1  | 5.9909  | 2.9 | 10.3431 | 7.8 | 0.4494 | 7.2 | 0.93 | 2392.6 | 144.4 | 2466.0 | 72.2 | 2527.0 | 48.7  | 2527.0 | 48.7  | 94.7  |
| MH0210 - 103 | 22   | 30426  | 1.3  | 5.5021  | 0.9 | 13.1889 | 5.0 | 0.5263 | 4.9 | 0.98 | 2725.9 | 108.7 | 2693.3 | 47.0 | 2668.9 | 14.9  | 2668.9 | 14.9  | 102.1 |
| MH0210 - 43  | 32   | 33589  | 0.4  | 5.3079  | 0.7 | 13.3259 | 1.7 | 0.5130 | 1.5 | 0.90 | 2669.4 | 32.8  | 2703.0 | 15.8 | 2728.2 | 12.2  | 2728.2 | 12.2  | 9     |

|              |     |        |      |         |      |         |      |        |     |      |        |      |        |      |        |       |        |      |             |
|--------------|-----|--------|------|---------|------|---------|------|--------|-----|------|--------|------|--------|------|--------|-------|--------|------|-------------|
| NL0108-98    | 86  | 14979  | 1.2  | 11.6652 | 1.8  | 2.7012  | 2.0  | 0.2285 | 0.8 | 0.42 | 1326.8 | 9.8  | 1328.8 | 14.5 | 1332.0 | 34.3  | 1332.0 | 34.3 | 99.6        |
| NL0108-33    | 214 | 19254  | 3.4  | 11.5611 | 1.4  | 2.5842  | 1.5  | 0.2167 | 0.7 | 0.43 | 1264.3 | 7.7  | 1296.2 | 11.3 | 1349.3 | 26.9  | 1349.3 | 26.9 | 93.7        |
| NL0108-64    | 143 | 21696  | 1.9  | 11.4509 | 2.0  | 2.5317  | 2.1  | 0.2103 | 0.5 | 0.22 | 1230.2 | 5.2  | 1281.2 | 14.9 | 1367.8 | 38.5  | 1367.8 | 38.5 | 89.9        |
| NL0108-34    | 185 | 44010  | 5.0  | 11.3397 | 1.2  | 2.8077  | 1.3  | 0.2309 | 0.6 | 0.46 | 1339.3 | 7.3  | 1357.6 | 9.7  | 1386.5 | 22.1  | 1386.5 | 22.1 | 96.6        |
| NL0108-19    | 538 | 12771  | 1.8  | 11.2055 | 3.2  | 2.3742  | 3.3  | 0.1930 | 0.5 | 0.14 | 1137.4 | 4.9  | 1234.9 | 23.3 | 1409.3 | 61.8  | 1409.3 | 61.8 | 80.7        |
| NL0108-7     | 124 | 33417  | 3.5  | 11.1572 | 1.3  | 2.9642  | 1.8  | 0.2399 | 1.2 | 0.69 | 1386.0 | 15.5 | 1398.5 | 13.7 | 1417.6 | 25.1  | 1417.6 | 25.1 | 97.8        |
| NL0108-13    | 189 | 36255  | 2.0  | 11.0959 | 1.4  | 3.1601  | 1.5  | 0.2543 | 0.6 | 0.37 | 1460.7 | 7.3  | 1447.5 | 11.6 | 1428.1 | 26.5  | 1428.1 | 26.5 | 102.3       |
| NL0108-31    | 248 | 55647  | 2.4  | 11.0482 | 0.7  | 3.1566  | 1.3  | 0.2529 | 1.1 | 0.84 | 1453.6 | 14.7 | 1446.6 | 10.4 | 1436.3 | 13.9  | 1436.3 | 13.9 | 101.2       |
| NL0108-100   | 75  | 15405  | 1.3  | 11.0215 | 1.7  | 3.2191  | 1.8  | 0.2573 | 0.4 | 0.20 | 1476.1 | 4.6  | 1461.8 | 13.7 | 1441.0 | 33.0  | 1441.0 | 33.0 | 102.4       |
| NL0108-58    | 242 | 41922  | 1.8  | 10.8759 | 1.6  | 3.1747  | 1.9  | 0.2504 | 0.9 | 0.49 | 1440.6 | 11.9 | 1451.0 | 14.5 | 1466.3 | 31.0  | 1466.3 | 31.0 | 98.3        |
| NL0108-5     | 698 | 17784  | 2.1  | 10.7758 | 2.4  | 2.9628  | 4.6  | 0.2316 | 3.9 | 0.85 | 1342.6 | 47.8 | 1398.1 | 35.0 | 1483.8 | 45.3  | 1483.8 | 45.3 | 90.5        |
| NL0108-77    | 337 | 40098  | 1.7  | 10.2009 | 1.7  | 3.4090  | 2.8  | 0.2522 | 2.3 | 0.80 | 1449.9 | 29.6 | 1506.5 | 22.3 | 1587.0 | 31.8  | 1587.0 | 31.8 | 91.4        |
| NL0108-55    | 290 | 25989  | 2.3  | 10.1093 | 1.5  | 3.2449  | 2.3  | 0.2379 | 1.8 | 0.77 | 1375.9 | 22.2 | 1468.0 | 18.2 | 1603.8 | 28.1  | 1603.8 | 28.1 | 85.8        |
| NL0108-23    | 461 | 96378  | 1.6  | 10.0994 | 1.6  | 3.0145  | 1.9  | 0.2208 | 1.0 | 0.52 | 1286.1 | 11.2 | 1411.3 | 14.2 | 1605.6 | 29.7  | 1605.6 | 29.7 | 80.1        |
| NL0108-21    | 43  | 10296  | 0.8  | 9.9631  | 1.2  | 3.9093  | 1.2  | 0.2825 | 0.4 | 0.29 | 1603.9 | 5.0  | 1615.6 | 9.8  | 1630.9 | 21.5  | 1630.9 | 21.5 | 98.3        |
| NL0108-70    | 127 | 30069  | 1.4  | 9.8605  | 0.9  | 4.0386  | 1.0  | 0.2888 | 0.5 | 0.45 | 1635.6 | 6.5  | 1642.0 | 8.1  | 1650.2 | 16.3  | 1650.2 | 16.3 | 99.1        |
| NL0108-83    | 156 | 20409  | 2.9  | 9.8079  | 1.0  | 4.0745  | 1.6  | 0.2898 | 1.2 | 0.78 | 1640.7 | 17.5 | 1649.2 | 12.6 | 1660.1 | 18.0  | 1660.1 | 18.0 | 98.8        |
| NL0108-62    | 244 | 54153  | 3.9  | 9.4619  | 0.9  | 4.4118  | 1.3  | 0.3028 | 1.0 | 0.74 | 1705.0 | 14.7 | 1714.6 | 11.0 | 1726.3 | 16.5  | 1726.3 | 16.5 | 98.8        |
| NL0108-9     | 178 | 35265  | 1.4  | 9.4456  | 0.9  | 3.9795  | 1.3  | 0.2726 | 0.9 | 0.69 | 1554.1 | 12.0 | 1630.0 | 10.2 | 1729.5 | 16.5  | 1729.5 | 16.5 | 89.9        |
| NL0108-45    | 261 | 50052  | 2.0  | 9.3861  | 1.7  | 4.4449  | 3.9  | 0.3026 | 3.5 | 0.90 | 1704.1 | 52.7 | 1720.8 | 32.6 | 1741.0 | 31.9  | 1741.0 | 31.9 | 97.9        |
| NL0108-69    | 123 | 37236  | 2.4  | 9.0987  | 1.7  | 4.6714  | 1.7  | 0.3083 | 0.2 | 0.12 | 1732.2 | 3.0  | 1762.1 | 14.5 | 1797.8 | 31.3  | 1797.8 | 31.3 | 96.3        |
| NL0108-48    | 109 | 25467  | 1.3  | 9.0475  | 1.3  | 4.8989  | 1.6  | 0.3215 | 1.0 | 0.62 | 1796.9 | 15.7 | 1802.1 | 13.7 | 1808.1 | 23.3  | 1808.1 | 23.3 | 99.4        |
| NL0108-92    | 221 | 44067  | 2.0  | 9.0244  | 1.3  | 4.7304  | 1.3  | 0.3096 | 0.3 | 0.22 | 1738.8 | 4.4  | 1772.6 | 11.2 | 1812.7 | 23.8  | 1812.7 | 23.8 | 95.9        |
| NL0108-88    | 266 | 87987  | 3.7  | 9.0167  | 1.1  | 4.8796  | 1.1  | 0.3191 | 0.2 | 0.15 | 1785.4 | 2.7  | 1798.7 | 9.5  | 1814.3 | 20.3  | 1814.3 | 20.3 | 98.4        |
| NL0108-60    | 193 | 29466  | 1.2  | 8.8754  | 1.4  | 4.0044  | 3.8  | 0.2578 | 3.6 | 0.93 | 1478.4 | 47.0 | 1635.1 | 31.1 | 1842.9 | 25.4  | 1842.9 | 25.4 | 80.2        |
| NL0108-29    | 149 | 45126  | 1.8  | 8.0859  | 2.2  | 5.9605  | 2.4  | 0.3496 | 0.8 | 0.33 | 1932.5 | 13.2 | 1970.1 | 20.7 | 2009.9 | 39.8  | 2009.9 | 39.8 | 96.1        |
| NL0108-87    | 262 | 48786  | 24.8 | 8.0198  | 2.6  | 5.0163  | 2.8  | 0.2918 | 1.2 | 0.43 | 1650.4 | 17.8 | 1822.1 | 24.1 | 2024.4 | 45.5  | 2024.4 | 45.5 | 81.5        |
| NL0108-84    | 103 | 26799  | 1.1  | 7.8289  | 2.0  | 6.7375  | 2.0  | 0.3826 | 0.5 | 0.23 | 2088.2 | 8.4  | 2077.6 | 17.8 | 2067.0 | 34.6  | 2067.0 | 34.6 | 101.0       |
| NL0108-20    | 68  | 23151  | 1.9  | 7.3367  | 0.8  | 7.6686  | 0.8  | 0.4081 | 0.2 | 0.20 | 2206.0 | 3.2  | 2192.9 | 7.6  | 2180.7 | 14.5  | 2180.7 | 14.5 | 101.2       |
| NL0108-97    | 79  | 25158  | 1.8  | 5.9961  | 1.1  | 10.5130 | 1.7  | 0.4572 | 1.3 | 0.78 | 2427.1 | 27.1 | 2481.1 | 15.9 | 2525.5 | 18.0  | 2525.5 | 18.0 | 96.1        |
| NL0108-42    | 131 | 47652  | 1.0  | 5.4204  | 2.1  | 12.1970 | 2.1  | 0.4795 | 0.2 | 0.10 | 2525.0 | 4.4  | 2619.7 | 19.4 | 2693.6 | 34.0  | 2693.6 | 34.0 | 93.7        |
| NL0108-89    | 177 | 68751  | 1.0  | 5.3353  | 1.2  | 13.5256 | 1.2  | 0.5234 | 0.3 | 0.25 | 2713.5 | 6.6  | 2717.1 | 11.2 | 2719.7 | 19.0  | 2719.7 | 19.0 | 99.8        |
| NL0108-22    | 39  | 19695  | 4.1  | 5.3224  | 1.3  | 13.6879 | 1.4  | 0.5284 | 0.6 | 0.45 | 2734.6 | 14.0 | 2728.4 | 13.2 | 2723.7 | 20.6  | 2723.7 | 20.6 | 100.4       |
| NL0108-46    | 73  | 27156  | 0.4  | 5.1692  | 1.2  | 14.0992 | 1.4  | 0.5286 | 0.7 | 0.51 | 2735.5 | 15.6 | 2756.4 | 12.9 | 2771.7 | 19.2  | 2771.7 | 19.2 | 98.7        |
| NL0108-37    | 110 | 49872  | 1.7  | 5.0765  | 1.6  | 14.6823 | 1.6  | 0.5406 | 0.3 | 0.18 | 2785.8 | 6.6  | 2794.9 | 15.4 | 2801.4 | 26.0  | 2801.4 | 26.0 | 99.4        |
| CCR0110 - 84 | 426 | 47565  | 1.3  | 20.0526 | 9.7  | 0.1671  | 10.0 | 0.0243 | 2.2 | 0.22 | 154.8  | 3.3  | 156.9  | 14.5 | 188.9  | 227.1 | 154.8  | 3.3  | NA 1.4, 1.0 |
| CCR0110 - 19 | 604 | 32105  | 1.9  | 19.4858 | 4.7  | 0.1800  | 5.0  | 0.0254 | 1.6 | 0.32 | 161.9  | 2.5  | 168.0  | 7.7  | 255.2  | 108.8 | 161.9  | 2.5  | NA          |
| CCR0110 - 21 | 192 | 23867  | 1.6  | 21.2118 | 10.3 | 0.1733  | 10.5 | 0.0267 | 1.8 | 0.17 | 169.6  | 3.0  | 162.3  | 15.7 | 56.5   | 246.2 | 169.6  | 3.0  | NA          |
| CCR0110 - 23 | 477 | 18407  | 1.7  | 19.4505 | 4.2  | 0.2074  | 4.8  | 0.0293 | 2.1 | 0.45 | 185.9  | 3.9  | 191.4  | 8.3  | 259.4  | 97.6  | 185.9  | 3.9  | NA          |
| CCR0110 - 10 | 329 | 16172  | 2.7  | 21.2284 | 7.4  | 0.1915  | 8.4  | 0.0295 | 4.0 | 0.47 | 187.3  | 7.3  | 177.9  | 13.7 | 54.6   | 177.5 | 187.3  | 7.3  | NA          |
| CCR0110 - 26 | 470 | 64121  | 17.0 | 16.4497 | 4.9  | 0.2648  | 7.0  | 0.0316 | 5.0 | 0.72 | 200.5  | 9.9  | 238.5  | 14.8 | 631.9  | 104.7 | 200.5  | 9.9  | NA          |
| CCR0110 - 97 | 879 | 10638  | 3.7  | 19.1578 | 2.9  | 0.2502  | 8.2  | 0.0348 | 7.7 | 0.93 | 220.3  | 16.6 | 226.8  | 16.7 | 294.1  | 66.8  | 220.3  | 16.6 | NA          |
| CCR0110 - 71 | 215 | 16311  | 1.2  | 20.7462 | 7.8  | 0.2543  | 8.5  | 0.0383 | 3.5 | 0.42 | 242.1  | 8.4  | 230.1  | 17.6 | 109.2  | 183.4 | 242.1  | 8.4  | NA          |
| CCR0110 - 24 | 243 | 21289  | 1.2  | 19.6436 | 5.4  | 0.2822  | 5.8  | 0.0402 | 2.1 | 0.35 | 254.1  | 5.1  | 252.4  | 12.9 | 236.7  | 124.7 | 254.1  | 5.1  | NA          |
| CCR0110 - 39 | 237 | 61547  | 1.0  | 17.7759 | 3.4  | 0.5270  | 4.1  | 0.0679 | 2.3 | 0.55 | 423.8  | 9.4  | 429.8  | 14.5 | 462.5  | 76.5  | 423.8  | 9.4  | NA          |
| CCR0110 - 16 | 166 | 26751  | 1.6  | 18.2478 | 7.4  | 0.5158  | 8.5  | 0.0683 | 4.2 | 0.49 | 425.7  | 17.2 | 422.3  | 29.2 | 404.1  | 165.0 | 425.7  | 17.2 | NA          |
| CCR0110 - 5  | 243 | 40100  | 2.4  | 18.0302 | 4.3  | 0.5231  | 4.7  | 0.0684 | 1.9 | 0.41 | 426.5  | 8.0  | 427.2  | 16.3 | 430.9  | 95.0  | 426.5  | 8.0  | NA          |
| CCR0110 - 51 | 105 | 7632   | 1.2  | 18.7974 | 11.0 | 0.5029  | 11.3 | 0.0686 | 2.7 | 0.24 | 427.5  | 11.2 | 413.7  | 38.4 | 337.3  | 248.8 | 427.5  | 11.2 | NA          |
| CCR0110 - 62 | 288 | 35126  | 1.5  | 17.9103 | 3.0  | 0.5659  | 3.4  | 0.0735 | 1.7 | 0.50 | 457.3  | 7.6  | 455.4  | 12.7 | 445.7  | 66.3  | 457.3  | 7.6  | NA          |
| CCR0110 - 81 | 84  | 20149  | 2.5  | 20.0115 | 14.3 | 0.5065  | 14.6 | 0.0735 | 2.9 | 0.20 | 457.3  | 12.8 | 416.1  | 49.8 | 193.7  | 333.6 | 457.3  | 12.8 | NA          |
| CCR0110 - 64 | 615 | 62943  | 2.8  | 17.7189 | 1.5  | 0.5818  | 2.3  | 0.0748 | 1.7 | 0.75 | 464.8  | 7.7  | 465.6  | 8.5  | 469.6  | 33.3  | 464.8  | 7.7  | NA          |
| CCR0110 - 95 | 259 | 35245  | 2.1  | 19.0565 | 3.6  | 0.5444  | 5.0  | 0.0752 | 3.6 | 0.71 | 467.6  | 16.2 | 441.3  | 18.1 | 306.2  | 81.0  | 467.6  | 16.2 | NA          |
| CCR0110 - 50 | 68  | 19328  | 2.0  | 17.2301 | 16.1 | 0.6153  | 16.5 | 0.0769 | 3.7 | 0.23 | 477.6  | 17.1 | 486.9  | 64.0 | 531.2  | 354.7 | 477.6  | 17.1 | 89.9        |
| CCR0110 - 52 | 102 | 10197  | 1.6  | 17.4631 | 7.5  | 0.6646  | 7.9  | 0.0842 | 2.6 | 0.32 | 521.0  | 12.9 | 517.4  | 32.2 | 501.7  | 165.7 | 521.0  | 12.9 | 103.8       |
| CCR0110 - 96 | 289 | 39852  | 0.9  | 17.1500 | 2.6  | 0.6990  | 3.0  | 0.0869 | 1.5 | 0.50 | 537.4  | 7.7  | 538.2  | 12.6 | 541.4  | 57.5  | 537.4  | 7.7  | 99.3        |
| CCR0110 - 37 | 84  | 10036  | 1.3  | 16.1814 | 6.5  | 0.7470  | 7.2  | 0.0877 | 3.1 | 0.43 | 541.8  | 16.2 | 566.5  | 31.4 | 667.2  | 139.8 | 541.8  | 16.2 | 81.2        |
| CCR0110 - 13 | 164 | 20231  | 2.9  | 17.1291 | 3.2  | 0.7208  | 4.0  | 0.0896 | 2.4 | 0.59 | 552.9  | 12.6 | 551.2  | 17.0 | 544.1  | 70.3  | 552.9  | 12.6 | 101.6       |
| CCR0110 - 85 | 467 | 208267 | 52.2 | 16.8776 | 1.6  | 0.7454  | 4.4  | 0.0912 | 4.1 | 0.93 | 562.9  | 22.2 | 565.6  | 19.1 | 576.3  | 34.0  | 562.9  | 22.2 | 97.7        |
| CCR0110 - 44 | 674 | 110761 | 28.1 | 17.1252 | 2.1  | 0.7367  | 2.8  | 0.0915 | 1.8 | 0.64 | 564.4  | 9.6  | 560.5  | 12.0 | 544.5  | 46.8  | 564.4  | 9.6  | 103.6       |
| CCR0110 - 91 | 291 | 81135  | 2.4  | 16.7044 | 1.7  | 0.7926  | 2.9  | 0.0960 | 2.4 | 0.82 | 591.1  | 13.7 | 592.7  | 13.2 | 598.7  | 35.9  | 591.1  | 13.7 | 98.7        |
| CCR0110 - 58 | 196 | 31956  | 0.8  | 16.6705 | 3.4  | 0.7993  | 3.8  | 0.0966 | 1.5 | 0.41 | 594.7  | 8.7  | 596.4  | 17.0 | 603.1  | 74.3  | 594.7  | 8.7  | 98.6        |
| CCR0110 - 89 | 507 | 140646 | 4.1  | 16.5247 | 1.6  | 0.8195  | 2.5  | 0.0982 | 1.9 | 0.77 | 603.9  | 11.2 | 607.7  | 11.6 | 622.0  | 35.0  | 603.9  | 11.2 | 97.1        |
| CCR0110 - 35 | 277 | 51234  | 1.2  | 16.7823 | 2.9  | 0.8094  | 3.3  | 0.0985 | 1.6 | 0.49 | 605.7  | 9.2  | 602.1  | 14.9 | 588.6  | 62.0  | 605.7  | 9.2  | 102.9</     |



|              |     |        |      |         |      |         |      |        |     |      |        |       |        |      |        |       |        |       |             |
|--------------|-----|--------|------|---------|------|---------|------|--------|-----|------|--------|-------|--------|------|--------|-------|--------|-------|-------------|
| CCR0110 - 67 | 125 | 66995  | 1.6  | 5.1895  | 0.5  | 14.4625 | 1.6  | 0.5443 | 1.5 | 0.94 | 2801.6 | 33.9  | 2780.5 | 15.0 | 2765.3 | 8.6   | 2765.3 | 8.6   | 101.3       |
| CCR0110 - 60 | 87  | 64638  | 1.9  | 4.5293  | 0.7  | 18.3283 | 4.2  | 0.6021 | 4.2 | 0.98 | 3038.2 | 101.1 | 3007.1 | 40.8 | 2986.4 | 11.9  | 2986.4 | 11.9  | 101.7       |
| CCR0110 - 18 | 92  | 184250 | 1.5  | 4.2783  | 0.6  | 19.9334 | 3.1  | 0.6185 | 3.0 | 0.98 | 3104.0 | 74.7  | 3088.1 | 30.0 | 3077.8 | 10.4  | 3077.8 | 10.4  | 100.9       |
| CCR0110 - 30 | 39  | 44330  | 2.6  | 3.6196  | 0.8  | 26.4294 | 2.5  | 0.6938 | 2.4 | 0.94 | 3397.1 | 62.3  | 3362.6 | 24.5 | 3342.0 | 13.2  | 3342.0 | 13.2  | 101.6       |
|              |     |        |      |         |      |         |      |        |     |      |        |       |        |      |        |       |        |       |             |
| MH0310-80    | 358 | 24733  | 2.2  | 23.8602 | 17.4 | 0.0878  | 18.5 | 0.0152 | 6.5 | 0.35 | 97.2   | 6.3   | 85.5   | 15.2 | -231.9 | 440.5 | 97.2   | 6.3   | NA 1.3, 0.8 |
| MH0310-69    | 257 | 19038  | 2.8  | 21.0869 | 12.3 | 0.1956  | 12.9 | 0.0299 | 3.8 | 0.30 | 190.0  | 7.2   | 181.4  | 21.5 | 70.6   | 294.5 | 190.0  | 7.2   | NA          |
| MH0310-100   | 387 | 37394  | 1.7  | 18.9385 | 3.0  | 0.2908  | 8.2  | 0.0399 | 7.6 | 0.93 | 252.5  | 18.8  | 259.2  | 18.6 | 320.3  | 67.4  | 252.5  | 18.8  | NA          |
| MH0310-23    | 367 | 80766  | 5.8  | 19.0722 | 4.0  | 0.3457  | 4.7  | 0.0478 | 2.5 | 0.53 | 301.2  | 7.5   | 301.5  | 12.4 | 304.3  | 91.5  | 301.2  | 7.5   | NA          |
| MH0310-47    | 436 | 58546  | 5.2  | 18.5816 | 2.2  | 0.3659  | 3.0  | 0.0493 | 2.1 | 0.69 | 310.3  | 6.3   | 316.6  | 8.2  | 363.4  | 49.2  | 310.3  | 6.3   | NA          |
| MH0310-68    | 481 | 80852  | 0.8  | 18.8235 | 3.2  | 0.3655  | 4.0  | 0.0499 | 2.3 | 0.58 | 313.9  | 7.1   | 316.3  | 10.8 | 334.1  | 72.9  | 313.9  | 7.1   | NA          |
| MH0310-67    | 135 | 34378  | 0.8  | 17.8841 | 5.6  | 0.4433  | 6.3  | 0.0575 | 2.9 | 0.46 | 360.4  | 10.3  | 372.6  | 19.8 | 449.0  | 125.3 | 360.4  | 10.3  | NA          |
| MH0310-33    | 230 | 41127  | 2.5  | 18.4938 | 3.3  | 0.4352  | 5.2  | 0.0584 | 4.0 | 0.77 | 365.7  | 14.4  | 366.9  | 16.1 | 374.0  | 74.9  | 365.7  | 14.4  | NA          |
| MH0310-1     | 180 | 23045  | 1.1  | 17.7202 | 5.5  | 0.4588  | 5.8  | 0.0590 | 1.8 | 0.31 | 369.3  | 6.5   | 383.4  | 18.5 | 469.4  | 121.6 | 369.3  | 6.5   | NA          |
| MH0310-82    | 131 | 25202  | 1.6  | 19.2563 | 3.3  | 0.4442  | 4.5  | 0.0620 | 3.0 | 0.68 | 388.0  | 11.5  | 373.2  | 14.0 | 282.4  | 75.7  | 388.0  | 11.5  | NA          |
| MH0310-94    | 80  | 16209  | 1.1  | 18.3311 | 9.5  | 0.4726  | 9.8  | 0.0628 | 2.3 | 0.23 | 392.8  | 8.6   | 393.0  | 31.9 | 393.9  | 214.3 | 392.8  | 8.6   | NA          |
| MH0310-9     | 276 | 39900  | 2.7  | 18.4508 | 4.5  | 0.4759  | 5.3  | 0.0637 | 2.8 | 0.52 | 398.0  | 10.7  | 395.2  | 17.3 | 379.3  | 101.5 | 398.0  | 10.7  | NA          |
| MH0310-21    | 70  | 8979   | 1.0  | 19.6455 | 12.5 | 0.4585  | 12.8 | 0.0653 | 3.0 | 0.23 | 407.9  | 11.7  | 383.2  | 40.9 | 236.4  | 288.3 | 407.9  | 11.7  | NA          |
| MH0310-7     | 95  | 30849  | 0.8  | 19.2381 | 22.2 | 0.4741  | 22.5 | 0.0662 | 3.8 | 0.17 | 412.9  | 15.4  | 394.0  | 73.8 | 284.6  | 513.6 | 412.9  | 15.4  | NA          |
| MH0310-6     | 446 | 70528  | 5.2  | 18.2980 | 1.2  | 0.5052  | 1.6  | 0.0671 | 1.0 | 0.63 | 418.4  | 4.1   | 415.2  | 5.5  | 397.9  | 28.0  | 418.4  | 4.1   | NA          |
| MH0310-81    | 236 | 32964  | 2.2  | 17.4721 | 7.1  | 0.5320  | 7.6  | 0.0674 | 2.7 | 0.36 | 420.6  | 11.1  | 433.2  | 26.9 | 500.6  | 156.9 | 420.6  | 11.1  | NA          |
| MH0310-20    | 147 | 4037   | 3.4  | 17.5066 | 7.1  | 0.5497  | 7.8  | 0.0698 | 3.2 | 0.41 | 434.9  | 13.4  | 444.8  | 28.0 | 496.2  | 156.4 | 434.9  | 13.4  | NA          |
| MH0310-88    | 282 | 18473  | 1.7  | 17.6899 | 4.4  | 0.5606  | 8.2  | 0.0719 | 6.9 | 0.85 | 447.7  | 30.0  | 451.9  | 29.9 | 473.2  | 97.0  | 447.7  | 30.0  | NA          |
| MH0310-34    | 163 | 27549  | 2.0  | 17.5916 | 5.6  | 0.5660  | 5.9  | 0.0722 | 2.1 | 0.35 | 449.5  | 9.1   | 455.4  | 21.8 | 485.5  | 122.9 | 449.5  | 9.1   | NA          |
| MH0310-48    | 90  | 19924  | 1.5  | 17.3073 | 9.4  | 0.5777  | 9.9  | 0.0725 | 3.1 | 0.31 | 451.3  | 13.5  | 463.0  | 36.9 | 521.4  | 207.5 | 451.3  | 13.5  | NA          |
| MH0310-86    | 153 | 28415  | 0.6  | 18.3290 | 3.2  | 0.5748  | 4.4  | 0.0764 | 3.1 | 0.70 | 474.6  | 14.3  | 461.1  | 16.5 | 394.1  | 70.8  | 474.6  | 14.3  | NA          |
| MH0310-44    | 355 | 39651  | 0.6  | 17.6680 | 2.0  | 0.6250  | 2.2  | 0.0801 | 1.0 | 0.44 | 496.7  | 4.7   | 493.0  | 8.8  | 476.0  | 44.7  | 496.7  | 4.7   | NA          |
| MH0310-59    | 148 | 27206  | 2.3  | 17.2868 | 4.7  | 0.6615  | 5.0  | 0.0829 | 1.6 | 0.33 | 513.6  | 8.1   | 515.5  | 20.2 | 524.0  | 103.4 | 513.6  | 8.1   | 98.0        |
| MH0310-8     | 456 | 5019   | 0.9  | 16.5428 | 3.6  | 0.7289  | 8.4  | 0.0875 | 7.6 | 0.90 | 540.5  | 39.1  | 555.9  | 35.9 | 619.7  | 78.0  | 540.5  | 39.1  | 87.2        |
| MH0310-91    | 576 | 132469 | 6.5  | 16.9878 | 1.3  | 0.7569  | 3.7  | 0.0933 | 3.5 | 0.94 | 574.8  | 19.0  | 572.2  | 16.1 | 562.1  | 27.8  | 574.8  | 19.0  | 102.3       |
| MH0310-99    | 344 | 89969  | 2.1  | 15.8916 | 2.5  | 0.8203  | 2.9  | 0.0945 | 1.5 | 0.51 | 582.4  | 8.2   | 608.2  | 13.1 | 705.7  | 52.4  | 582.4  | 8.2   | 82.5        |
| MH0310-13    | 220 | 59382  | 1.8  | 16.6921 | 3.0  | 0.7825  | 5.5  | 0.0947 | 4.6 | 0.84 | 583.5  | 25.8  | 586.9  | 24.6 | 600.3  | 65.3  | 583.5  | 25.8  | 97.2        |
| MH0310-62    | 342 | 59684  | 2.2  | 16.7522 | 1.9  | 0.7856  | 4.3  | 0.0955 | 3.8 | 0.90 | 587.7  | 21.6  | 588.7  | 19.1 | 592.5  | 40.8  | 587.7  | 21.6  | 99.2        |
| MH0310-61    | 215 | 80821  | 1.2  | 16.7283 | 3.2  | 0.7950  | 4.2  | 0.0965 | 2.8 | 0.66 | 593.6  | 15.7  | 594.0  | 19.0 | 595.6  | 69.0  | 593.6  | 15.7  | 99.7        |
| MH0310-49    | 63  | 16067  | 1.1  | 16.5306 | 9.4  | 0.8058  | 9.6  | 0.0966 | 1.8 | 0.19 | 594.5  | 10.5  | 600.1  | 43.4 | 621.3  | 203.2 | 594.5  | 10.5  | 95.7        |
| MH0310-60    | 155 | 31251  | 21.6 | 16.6577 | 4.6  | 0.8092  | 5.2  | 0.0978 | 2.4 | 0.46 | 601.3  | 13.8  | 602.0  | 23.5 | 604.7  | 99.2  | 601.3  | 13.8  | 99.4        |
| MH0310-84    | 137 | 43274  | 2.8  | 16.8130 | 3.6  | 0.8052  | 4.7  | 0.0982 | 3.0 | 0.64 | 603.7  | 17.4  | 599.7  | 21.4 | 584.6  | 78.8  | 603.7  | 17.4  | 103.3       |
| MH0310-43    | 282 | 65968  | 1.6  | 16.4748 | 1.9  | 0.8318  | 3.5  | 0.0994 | 2.9 | 0.83 | 610.8  | 16.9  | 614.6  | 16.1 | 628.6  | 41.3  | 610.8  | 16.9  | 97.2        |
| MH0310-55    | 349 | 87365  | 2.3  | 16.7435 | 1.3  | 0.8310  | 1.8  | 0.1009 | 1.3 | 0.69 | 619.8  | 7.5   | 614.2  | 8.5  | 593.6  | 28.8  | 619.8  | 7.5   | 104.4       |
| MH0310-42    | 266 | 36084  | 4.0  | 16.3263 | 2.8  | 0.8594  | 4.7  | 0.1018 | 3.7 | 0.80 | 624.8  | 22.3  | 629.8  | 22.0 | 648.1  | 60.6  | 624.8  | 22.3  | 96.4        |
| MH0310-90    | 155 | 36660  | 6.3  | 15.0051 | 3.2  | 0.9586  | 10.0 | 0.1043 | 9.5 | 0.95 | 639.7  | 57.9  | 682.6  | 49.8 | 826.7  | 65.9  | 639.7  | 57.9  | 77.4        |
| MH0310-89    | 381 | 71865  | 1.9  | 16.0771 | 1.9  | 0.9115  | 3.7  | 0.1063 | 3.2 | 0.86 | 651.1  | 19.8  | 657.8  | 17.9 | 681.0  | 39.6  | 651.1  | 19.8  | 95.6        |
| MH0310-39    | 141 | 46949  | 1.1  | 15.9355 | 2.2  | 0.9227  | 3.0  | 0.1066 | 2.0 | 0.66 | 653.2  | 12.3  | 663.8  | 14.6 | 699.8  | 47.5  | 653.2  | 12.3  | 93.3        |
| MH0310-66    | 194 | 57757  | 4.5  | 16.0988 | 4.2  | 0.9322  | 5.6  | 0.1088 | 3.7 | 0.66 | 666.0  | 23.6  | 668.8  | 27.7 | 678.1  | 90.5  | 666.0  | 23.6  | 98.2        |
| MH0310-32    | 84  | 2696   | 1.2  | 14.7915 | 8.4  | 1.0571  | 10.9 | 0.1134 | 6.9 | 0.63 | 692.5  | 45.1  | 732.4  | 56.7 | 856.5  | 174.7 | 692.5  | 45.1  | 80.9        |
| MH0310-72    | 165 | 81290  | 1.9  | 15.3009 | 3.4  | 1.1148  | 3.7  | 0.1237 | 1.5 | 0.41 | 751.9  | 10.8  | 760.5  | 19.9 | 785.8  | 71.1  | 751.9  | 10.8  | 95.7        |
| MH0310-97    | 194 | 57761  | 5.1  | 14.0867 | 1.3  | 1.3162  | 3.4  | 0.1345 | 3.1 | 0.92 | 813.3  | 23.7  | 852.9  | 19.5 | 957.1  | 27.3  | 813.3  | 23.7  | 85.0        |
| MH0310-35    | 30  | 12123  | 1.3  | 13.6966 | 7.7  | 1.6721  | 7.9  | 0.1661 | 1.9 | 0.24 | 990.6  | 17.5  | 998.0  | 50.2 | 1014.2 | 155.3 | 1014.2 | 155.3 | 97.7        |
| MH0310-36    | 101 | 46539  | 5.2  | 13.6569 | 0.9  | 1.7325  | 1.6  | 0.1716 | 1.3 | 0.83 | 1020.9 | 12.2  | 1020.7 | 10.0 | 1020.1 | 17.5  | 1020.1 | 17.5  | 100.1       |
| MH0310-95    | 132 | 40432  | 2.1  | 13.6425 | 2.7  | 1.7112  | 2.8  | 0.1693 | 0.7 | 0.23 | 1008.3 | 6.1   | 1012.7 | 17.8 | 1022.2 | 54.8  | 1022.2 | 54.8  | 98.6        |
| MH0310-98    | 180 | 65820  | 2.7  | 13.5638 | 1.4  | 1.7218  | 2.9  | 0.1694 | 2.6 | 0.88 | 1008.7 | 23.9  | 1016.7 | 18.6 | 1034.0 | 27.5  | 1034.0 | 27.5  | 97.6        |
| MH0310-70    | 151 | 43307  | 2.8  | 13.5363 | 1.9  | 1.7620  | 3.8  | 0.1730 | 3.3 | 0.86 | 1028.5 | 31.5  | 1031.6 | 24.8 | 1038.0 | 39.1  | 1038.0 | 39.1  | 99.1        |
| MH0310-45    | 354 | 170914 | 3.5  | 13.4955 | 0.9  | 1.8458  | 2.0  | 0.1807 | 1.8 | 0.89 | 1070.6 | 17.5  | 1061.9 | 13.2 | 1044.1 | 18.8  | 1044.1 | 18.8  | 102.5       |
| MH0310-28    | 201 | 136616 | 3.0  | 13.2466 | 1.1  | 1.9170  | 2.1  | 0.1842 | 1.8 | 0.86 | 1089.7 | 18.2  | 1087.0 | 14.1 | 1081.6 | 21.5  | 1081.6 | 21.5  | 100.8       |
| MH0310-29    | 115 | 53564  | 2.7  | 13.1871 | 2.1  | 1.8264  | 5.8  | 0.1747 | 5.4 | 0.93 | 1037.9 | 52.2  | 1055.0 | 38.3 | 1090.6 | 41.7  | 1090.6 | 41.7  | 95.2        |
| MH0310-24    | 139 | 45940  | 4.2  | 13.1651 | 2.4  | 1.8893  | 2.9  | 0.1804 | 1.6 | 0.55 | 1069.1 | 15.8  | 1077.3 | 19.3 | 1094.0 | 48.6  | 1094.0 | 48.6  | 97.7        |
| MH0310-73    | 92  | 18693  | 1.2  | 13.1615 | 2.1  | 1.7785  | 5.4  | 0.1698 | 4.9 | 0.92 | 1010.8 | 46.1  | 1037.6 | 34.9 | 1094.5 | 42.8  | 1094.5 | 42.8  | 92.4        |
| MH0310-46    | 129 | 51630  | 1.2  | 13.1317 | 2.7  | 1.9972  | 3.3  | 0.1902 | 1.9 | 0.59 | 1122.5 | 19.9  | 1114.6 | 22.4 | 1099.0 | 53.6  | 1099.0 | 53.6  | 102.1       |
| MH0310-54    | 105 | 32035  | 1.2  | 13.1237 | 2.2  | 2.0362  | 4.5  | 0.1938 | 3.9 | 0.87 | 1142.0 | 41.1  | 1127.7 | 30.6 | 1100.3 | 43.7  | 1100.3 | 43.7  | 103.8       |
| MH0310-50    | 145 | 39134  | 2.0  | 13.1087 | 2.8  | 1.9149  | 3.4  | 0.1821 | 1.9 | 0.57 | 1078.2 | 18.9  | 1086.3 | 22.4 | 1102.6 | 55.4  | 1102.6 | 55.4  | 97.8        |
| MH0310-85    | 94  | 36137  | 2.6  | 12.9290 | 2.9  | 2.0190  | 4.7  | 0.1893 | 3.7 | 0.79 | 1117.7 | 38.3  | 1121.9 | 32.2 | 1130.1 | 58.3  | 1130.1 | 58.3  | 98.9        |
| MH0310-18    | 53  | 57956  | 2.2  | 12.8731 | 4.4  | 2.0577  | 5.7  | 0.1921 | 3.7 | 0.65 | 1132.8 | 38.9  | 1134.8 | 39.3 | 1138.8 | 86.8  | 1138.8 | 86.8  | 99.5        |
| MH0310-65    | 32  | 6261   | 1.9  | 12.8283 | 4.6  | 2.1113  | 5.3  | 0.1964 | 2.7 | 0.50 | 1156.2 | 28.4  | 1152.5 | 36.7 | 1145.7 | 91.4  | 1145.7 | 91.4  | 100.9       |
| MH0310-27    | 178 | 149193 | 2.5  | 12.7099 | 1.7  | 2.0987  | 3.5  | 0.1935 | 3.0 | 0.88 | 1140.1 | 31.7  | 1148.4 | 23.8 | 1164.0 | 33.1  | 11     |       |             |

|               |      |        |      |         |      |         |      |        |     |      |        |       |        |      |        |       |        |      |             |
|---------------|------|--------|------|---------|------|---------|------|--------|-----|------|--------|-------|--------|------|--------|-------|--------|------|-------------|
| CCR0210 - 76  | 280  | 195467 | 1.1  | 16.2658 | 1.5  | 0.8946  | 2.2  | 0.1055 | 1.6 | 0.72 | 646.8  | 9.6   | 648.9  | 10.5 | 656.0  | 32.7  | 646.8  | 9.6  | 98.6        |
| CCR0210 - 44  | 36   | 6947   | 1.5  | 16.4275 | 3.8  | 0.8860  | 5.8  | 0.1056 | 4.5 | 0.77 | 646.9  | 27.5  | 644.2  | 27.9 | 634.8  | 80.8  | 646.9  | 27.5 | 101.9       |
| CCR0210 - 7   | 150  | 17377  | 1.5  | 16.2932 | 3.8  | 0.9041  | 4.1  | 0.1068 | 1.6 | 0.40 | 654.3  | 10.2  | 653.9  | 19.8 | 652.4  | 80.8  | 654.3  | 10.2 | 100.3       |
| CCR0210 - 70  | 202  | 39149  | 2.6  | 16.3269 | 3.3  | 0.9077  | 3.9  | 0.1075 | 2.0 | 0.52 | 658.1  | 12.6  | 655.8  | 18.8 | 648.0  | 71.8  | 658.1  | 12.6 | 101.6       |
| CCR0210 - 6   | 127  | 36397  | 1.6  | 16.0022 | 3.0  | 0.9665  | 3.3  | 0.1122 | 1.4 | 0.41 | 685.4  | 8.8   | 686.7  | 16.5 | 691.0  | 64.3  | 685.4  | 8.8  | 99.2        |
| CCR0210 - 45  | 303  | 57234  | 6.0  | 14.1514 | 2.6  | 1.2136  | 4.4  | 0.1246 | 3.5 | 0.80 | 756.8  | 24.9  | 806.9  | 24.3 | 947.7  | 53.9  | 756.8  | 24.9 | 79.9        |
| CCR0210 - 30  | 102  | 30182  | 5.7  | 14.8824 | 3.6  | 1.2490  | 4.9  | 0.1348 | 3.3 | 0.68 | 815.2  | 25.5  | 822.9  | 27.8 | 843.8  | 75.5  | 815.2  | 25.5 | 96.6        |
| CCR0210 - 82  | 95   | 60875  | 3.2  | 13.9416 | 2.7  | 1.4186  | 6.6  | 0.1434 | 6.0 | 0.91 | 864.1  | 48.2  | 896.8  | 39.1 | 978.2  | 56.0  | 978.2  | 56.0 | 88.3        |
| CCR0210 - 26  | 382  | 193825 | 2.5  | 13.9197 | 0.6  | 1.6624  | 1.4  | 0.1678 | 1.3 | 0.90 | 1000.1 | 11.8  | 994.3  | 8.9  | 981.5  | 12.5  | 981.5  | 12.5 | 101.9       |
| CCR0210 - 95  | 236  | 118147 | 3.6  | 13.7689 | 1.1  | 1.6501  | 1.4  | 0.1648 | 0.8 | 0.59 | 983.3  | 7.4   | 989.6  | 8.8  | 1003.6 | 22.8  | 1003.6 | 22.8 | 98.0        |
| CCR0210 - 23  | 199  | 219894 | 2.0  | 13.6855 | 1.2  | 1.6769  | 1.6  | 0.1664 | 1.0 | 0.64 | 992.5  | 9.2   | 999.8  | 10.0 | 1015.9 | 24.5  | 1015.9 | 24.5 | 97.7        |
| CCR0210 - 4   | 119  | 56829  | 1.4  | 13.6624 | 1.8  | 1.7905  | 2.2  | 0.1774 | 1.3 | 0.60 | 1052.8 | 13.0  | 1042.0 | 14.5 | 1019.3 | 36.0  | 1019.3 | 36.0 | 103.3       |
| CCR0210 - 91  | 630  | 197471 | 12.1 | 13.5533 | 0.4  | 1.6698  | 1.1  | 0.1641 | 1.1 | 0.94 | 979.7  | 9.6   | 997.1  | 7.2  | 1035.5 | 7.9   | 1035.5 | 7.9  | 94.6        |
| CCR0210 - 34  | 142  | 57382  | 1.2  | 13.4298 | 2.2  | 1.7629  | 2.8  | 0.1717 | 1.6 | 0.59 | 1021.5 | 15.3  | 1031.9 | 18.0 | 1054.0 | 45.2  | 1054.0 | 45.2 | 96.9        |
| CCR0210 - 89  | 319  | 195398 | 2.2  | 13.3886 | 0.8  | 1.9393  | 3.9  | 0.1883 | 3.8 | 0.98 | 1112.2 | 39.2  | 1094.7 | 26.2 | 1060.2 | 15.3  | 1060.2 | 15.3 | 104.9       |
| CCR0210 - 78  | 364  | 34271  | 4.1  | 13.2521 | 1.0  | 1.7662  | 2.8  | 0.1698 | 2.6 | 0.93 | 1010.8 | 24.2  | 1033.1 | 18.1 | 1080.8 | 21.0  | 1080.8 | 21.0 | 93.5        |
| CCR0210 - 96  | 71   | 67601  | 2.9  | 13.2282 | 1.9  | 1.7950  | 2.6  | 0.1722 | 1.8 | 0.70 | 1024.3 | 17.4  | 1043.6 | 17.0 | 1084.4 | 37.2  | 1084.4 | 37.2 | 94.5        |
| CCR0210 - 93  | 942  | 9500   | 79.6 | 13.0267 | 0.5  | 2.0010  | 3.3  | 0.1891 | 3.3 | 0.99 | 1116.2 | 33.4  | 1115.8 | 22.4 | 1115.1 | 10.8  | 1115.1 | 10.8 | 100.1       |
| CCR0210 - 32  | 263  | 149459 | 2.4  | 12.9624 | 1.0  | 2.0499  | 3.1  | 0.1927 | 2.9 | 0.94 | 1136.1 | 30.5  | 1132.2 | 21.2 | 1125.0 | 20.5  | 1125.0 | 20.5 | 101.0       |
| CCR0210 - 49  | 190  | 278187 | 2.2  | 12.9222 | 1.7  | 2.1189  | 3.0  | 0.1986 | 2.5 | 0.83 | 1167.7 | 26.8  | 1155.0 | 20.8 | 1131.2 | 33.3  | 1131.2 | 33.3 | 103.2       |
| CCR0210 - 80  | 144  | 100415 | 2.0  | 12.7967 | 1.7  | 2.1423  | 2.0  | 0.1988 | 1.0 | 0.51 | 1169.0 | 11.0  | 1162.6 | 13.8 | 1150.6 | 33.9  | 1150.6 | 33.9 | 101.6       |
| CCR0210 - 43  | 397  | 204247 | 2.8  | 12.7333 | 0.6  | 2.1068  | 0.9  | 0.1946 | 0.6 | 0.69 | 1146.0 | 6.2   | 1151.0 | 5.9  | 1160.4 | 12.3  | 1160.4 | 12.3 | 98.8        |
| CCR0210 - 88  | 138  | 47210  | 2.4  | 12.6889 | 2.1  | 2.1062  | 2.4  | 0.1938 | 1.2 | 0.51 | 1142.1 | 12.8  | 1150.8 | 16.6 | 1167.3 | 41.3  | 1167.3 | 41.3 | 97.8        |
| CCR0210 - 16  | 444  | 16981  | 2.0  | 12.5982 | 0.7  | 2.2086  | 1.2  | 0.2018 | 1.0 | 0.82 | 1185.0 | 10.7  | 1183.8 | 8.5  | 1181.6 | 13.8  | 1181.6 | 13.8 | 100.3       |
| CCR0210 - 90  | 176  | 88738  | 3.4  | 12.5297 | 1.1  | 2.1563  | 1.7  | 0.1960 | 1.3 | 0.77 | 1153.6 | 13.7  | 1167.1 | 11.7 | 1192.3 | 21.2  | 1192.3 | 21.2 | 96.7        |
| CCR0210 - 40  | 403  | 255558 | 4.3  | 12.4771 | 0.4  | 2.3284  | 2.5  | 0.2107 | 2.4 | 0.98 | 1232.6 | 27.1  | 1221.0 | 17.4 | 1200.6 | 8.5   | 1200.6 | 8.5  | 102.7       |
| CCR0210 - 38  | 217  | 34343  | 2.0  | 11.9190 | 0.8  | 2.4027  | 8.4  | 0.2077 | 8.4 | 1.00 | 1216.6 | 92.9  | 1243.4 | 60.4 | 1290.2 | 15.0  | 1290.2 | 15.0 | 94.3        |
| CCR0210 - 9   | 57   | 26703  | 0.9  | 11.8683 | 3.9  | 2.6810  | 4.5  | 0.2308 | 2.2 | 0.48 | 1338.6 | 26.4  | 1323.2 | 33.3 | 1298.5 | 76.6  | 1298.5 | 76.6 | 103.1       |
| CCR0210 - 63  | 60   | 20514  | 1.7  | 11.2105 | 3.9  | 2.6768  | 8.0  | 0.2176 | 6.9 | 0.87 | 1269.4 | 79.8  | 1322.1 | 58.8 | 1408.5 | 74.8  | 1408.5 | 74.8 | 90.1        |
| CCR0210 - 2   | 197  | 41904  | 2.4  | 11.1006 | 0.7  | 3.0093  | 1.3  | 0.2423 | 1.1 | 0.85 | 1398.5 | 13.4  | 1410.0 | 9.6  | 1427.3 | 12.7  | 1427.3 | 12.7 | 98.0        |
| CCR0210 - 50  | 75   | 58380  | 2.2  | 10.9511 | 1.1  | 3.2089  | 2.5  | 0.2549 | 2.2 | 0.90 | 1463.5 | 28.8  | 1459.3 | 19.0 | 1453.2 | 20.8  | 1453.2 | 20.8 | 100.7       |
| CCR0210 - 100 | 657  | 21355  | 2.8  | 10.6532 | 0.3  | 3.1372  | 3.9  | 0.2424 | 3.9 | 1.00 | 1399.1 | 48.9  | 1441.9 | 30.1 | 1505.5 | 5.9   | 1505.5 | 5.9  | 92.9        |
| CCR0210 - 73  | 140  | 92414  | 3.5  | 10.5042 | 1.0  | 3.5689  | 2.0  | 0.2719 | 1.7 | 0.87 | 1550.4 | 23.7  | 1542.6 | 15.7 | 1532.0 | 18.5  | 1532.0 | 18.5 | 101.2       |
| CCR0210 - 19  | 230  | 32673  | 1.4  | 9.8698  | 2.4  | 3.9857  | 8.0  | 0.2853 | 7.6 | 0.95 | 1618.0 | 108.7 | 1631.3 | 64.7 | 1648.4 | 44.4  | 1648.4 | 44.4 | 98.2        |
| CCR0210 - 35  | 242  | 40853  | 3.1  | 9.8429  | 0.8  | 4.0519  | 5.4  | 0.2893 | 5.3 | 0.99 | 1637.8 | 76.5  | 1644.7 | 43.6 | 1653.5 | 15.0  | 1653.5 | 15.0 | 99.1        |
| CCR0210 - 68  | 164  | 77918  | 1.3  | 9.8142  | 0.4  | 4.2062  | 2.8  | 0.2994 | 2.7 | 0.99 | 1688.3 | 40.5  | 1675.2 | 22.7 | 1658.9 | 8.3   | 1658.9 | 8.3  | 101.8       |
| CCR0210 - 22  | 502  | 304869 | 2.8  | 9.4199  | 0.3  | 4.6103  | 2.0  | 0.3150 | 2.0 | 0.99 | 1765.1 | 30.2  | 1751.1 | 16.5 | 1734.4 | 4.7   | 1734.4 | 4.7  | 101.8       |
| CCR0210 - 41  | 488  | 33266  | 3.9  | 9.3254  | 0.4  | 4.4404  | 1.9  | 0.3003 | 1.9 | 0.98 | 1692.9 | 28.5  | 1719.9 | 16.2 | 1752.9 | 6.8   | 1752.9 | 6.8  | 96.6        |
| CCR0210 - 18  | 305  | 10005  | 1.5  | 9.2606  | 0.6  | 3.7936  | 2.9  | 0.2548 | 2.8 | 0.98 | 1463.2 | 36.9  | 1591.4 | 23.2 | 1765.7 | 11.4  | 1765.7 | 11.4 | 82.9        |
| CCR0210 - 87  | 226  | 350112 | 3.9  | 9.0970  | 0.7  | 4.9138  | 1.7  | 0.3242 | 1.5 | 0.90 | 1810.2 | 23.8  | 1804.6 | 14.1 | 1798.2 | 13.3  | 1798.2 | 13.3 | 100.7       |
| CCR0210 - 52  | 131  | 68739  | 1.6  | 9.0116  | 0.5  | 5.0224  | 2.5  | 0.3283 | 2.4 | 0.98 | 1829.9 | 39.0  | 1823.1 | 21.1 | 1815.3 | 9.0   | 1815.3 | 9.0  | 100.8       |
| CCR0210 - 69  | 135  | 159696 | 0.9  | 8.9756  | 0.8  | 4.9357  | 5.1  | 0.3213 | 5.0 | 0.99 | 1796.1 | 78.5  | 1808.4 | 42.8 | 1822.6 | 14.3  | 1822.6 | 14.3 | 98.5        |
| CCR0210 - 46  | 154  | 146430 | 1.8  | 8.9213  | 0.3  | 5.2207  | 2.8  | 0.3378 | 2.7 | 0.99 | 1876.1 | 44.6  | 1856.0 | 23.5 | 1833.6 | 5.5   | 1833.6 | 5.5  | 102.3       |
| CCR0210 - 12  | 331  | 23620  | 4.4  | 8.7617  | 0.3  | 4.3049  | 5.1  | 0.2736 | 5.1 | 1.00 | 1558.8 | 70.9  | 1694.3 | 42.3 | 1866.2 | 4.7   | 1866.2 | 4.7  | 83.5        |
| CCR0210 - 15  | 251  | 131684 | 4.8  | 8.6669  | 0.3  | 4.5507  | 2.1  | 0.2860 | 2.1 | 0.99 | 1621.7 | 29.7  | 1740.3 | 17.4 | 1885.8 | 4.9   | 1885.8 | 4.9  | 86.0        |
| CCR0210 - 99  | 213  | 20565  | 1.5  | 8.2706  | 2.4  | 4.6322  | 4.7  | 0.2779 | 4.0 | 0.86 | 1580.5 | 56.0  | 1755.1 | 38.9 | 1969.7 | 42.6  | 1969.7 | 42.6 | 80.2        |
| CCR0210 - 56  | 172  | 177881 | 1.7  | 7.9562  | 0.3  | 6.1687  | 3.1  | 0.3560 | 3.1 | 0.99 | 1963.0 | 51.7  | 2000.0 | 26.9 | 2038.5 | 5.8   | 2038.5 | 5.8  | 96.3        |
| CCR0210 - 98  | 433  | 185833 | 8.6  | 7.8782  | 0.7  | 6.6314  | 1.5  | 0.3789 | 1.4 | 0.89 | 2071.2 | 24.3  | 2063.5 | 13.6 | 2055.9 | 12.5  | 2055.9 | 12.5 | 100.7       |
| CCR0210 - 54  | 120  | 147507 | 1.0  | 7.6598  | 0.7  | 6.9507  | 2.1  | 0.3861 | 2.0 | 0.94 | 2104.9 | 35.1  | 2105.2 | 18.4 | 2105.4 | 12.2  | 2105.4 | 12.2 | 100.0       |
| CCR0210 - 74  | 100  | 69731  | 1.2  | 7.3284  | 1.0  | 6.7167  | 2.4  | 0.3570 | 2.2 | 0.92 | 1967.9 | 36.8  | 2074.8 | 21.0 | 2182.7 | 16.7  | 2182.7 | 16.7 | 90.2        |
| CCR0210 - 17  | 246  | 12260  | 2.8  | 6.2446  | 0.5  | 9.2382  | 6.0  | 0.4184 | 5.9 | 1.00 | 2253.2 | 113.0 | 2361.9 | 54.7 | 2457.1 | 9.2   | 2457.1 | 9.2  | 91.7        |
| CCR0210 - 1   | 110  | 80766  | 1.1  | 5.4707  | 0.4  | 13.2619 | 2.5  | 0.5262 | 2.5 | 0.99 | 2725.4 | 55.5  | 2698.5 | 23.8 | 2678.3 | 6.1   | 2678.3 | 6.1  | 101.8       |
| CCR0210 - 86  | 176  | 65260  | 2.1  | 4.9918  | 1.2  | 13.3736 | 3.7  | 0.4842 | 3.5 | 0.95 | 2545.4 | 74.2  | 2706.4 | 35.1 | 2828.9 | 19.0  | 2828.9 | 19.0 | 90.0        |
| CCR0210 - 21  | 136  | 108960 | 0.9  | 4.5513  | 0.3  | 17.9418 | 2.6  | 0.5922 | 2.6 | 0.99 | 2998.5 | 63.1  | 2986.6 | 25.4 | 2978.6 | 4.6   | 2978.6 | 4.6  | 100.7       |
| CCR0310-53    | 182  | 12511  | 2.4  | 21.4769 | 21.0 | 0.2297  | 21.2 | 0.0358 | 3.4 | 0.16 | 226.6  | 7.5   | 210.0  | 40.3 | 26.8   | 507.8 | 226.6  | 7.5  | NA 1.2, 0.9 |
| CCR0310-104   | 536  | 22524  | 0.8  | 19.3673 | 5.2  | 0.2569  | 5.3  | 0.0361 | 1.0 | 0.18 | 228.5  | 2.2   | 232.2  | 11.0 | 269.2  | 119.6 | 228.5  | 2.2  | NA          |
| CCR0310-97    | 233  | 13916  | 0.9  | 19.4546 | 13.8 | 0.2589  | 15.0 | 0.0365 | 5.8 | 0.39 | 231.3  | 13.2  | 233.8  | 31.3 | 258.9  | 318.3 | 231.3  | 13.2 | NA          |
| CCR0310 - 44  | 219  | 8128   | 1.9  | 19.7015 | 11.7 | 0.2746  | 13.2 | 0.0392 | 6.1 | 0.47 | 248.1  | 15.0  | 246.4  | 28.8 | 229.8  | 270.1 | 248.1  | 15.0 | NA          |
| CCR0310-95    | 177  | 12718  | 0.5  | 19.5625 | 16.4 | 0.3798  | 17.7 | 0.0539 | 6.8 | 0.38 | 338.3  | 22.4  | 326.9  | 49.5 | 246.2  | 378.7 | 338.3  | 22.4 | NA          |
| CCR0310-74    | 564  | 88618  | 8.2  | 18.2792 | 2.8  | 0.4190  | 4.7  | 0.0555 | 3.8 | 0.80 | 348.5  | 12.8  | 355.3  | 14.1 | 400.2  | 63.1  | 348.5  | 12.8 | NA          |
| CCR0310-89    | 1602 | 195937 | 3.0  | 18.4865 | 1.0  | 0.4143  | 2.6  | 0.0556 | 2.5 | 0.93 | 348.5  | 8.3   | 352.0  | 7.8  | 374.9  | 21.5  | 348.5  | 8.3  | NA          |
| CCR0310-56    | 747  | 53219  | 6.5  | 18.3275 | 2.2  | 0.4532  | 3.2  | 0.0602 | 2.3 | 0.72 | 377.1  | 8.6   | 379.5  | 10.3 | 394.3  | 50.1  | 377.1  | 8.6  | NA          |
| CCR0310-68    | 902  | 78061  | 16.6 | 18.3103 | 1.7  | 0.4554  |      |        |     |      |        |       |        |      |        |       |        |      |             |



|              |      |         |      |         |      |         |      |        |     |      |        |      |        |      |        |       |        |       |             |
|--------------|------|---------|------|---------|------|---------|------|--------|-----|------|--------|------|--------|------|--------|-------|--------|-------|-------------|
| CCR0310-64   | 498  | 1248568 | 2.0  | 10.5179 | 0.6  | 3.4823  | 7.2  | 0.2656 | 7.2 | 1.00 | 1518.6 | 97.6 | 1523.2 | 57.2 | 1529.6 | 12.1  | 1529.6 | 12.1  | 99.3        |
| CCR0310 - 25 | 583  | 235564  | 3.5  | 10.4503 | 0.3  | 3.4522  | 1.3  | 0.2617 | 1.3 | 0.97 | 1498.3 | 16.9 | 1516.4 | 10.3 | 1541.7 | 6.4   | 1541.7 | 6.4   | 97.2        |
| CCR0310-47   | 311  | 124009  | 3.3  | 10.3547 | 0.9  | 3.5519  | 5.5  | 0.2667 | 5.4 | 0.99 | 1524.3 | 73.6 | 1538.9 | 43.5 | 1559.0 | 16.4  | 1559.0 | 16.4  | 97.8        |
| CCR0310-63   | 473  | 238825  | 2.8  | 10.1243 | 0.4  | 3.6526  | 1.6  | 0.2682 | 1.5 | 0.96 | 1531.7 | 20.4 | 1561.1 | 12.5 | 1601.1 | 8.4   | 1601.1 | 8.4   | 95.7        |
| CCR0310 - 39 | 72   | 26152   | 0.9  | 10.1126 | 3.1  | 3.8654  | 4.4  | 0.2835 | 3.1 | 0.70 | 1609.0 | 43.9 | 1606.5 | 35.6 | 1603.2 | 58.8  | 1603.2 | 58.8  | 100.4       |
| CCR0310-71   | 174  | 55709   | 3.0  | 10.0150 | 0.9  | 3.9157  | 2.7  | 0.2844 | 2.5 | 0.94 | 1613.6 | 35.7 | 1616.9 | 21.5 | 1621.3 | 16.5  | 1621.3 | 16.5  | 99.5        |
| CCR0310 - 5  | 151  | 91109   | 1.0  | 9.8116  | 1.1  | 4.0271  | 5.1  | 0.2866 | 5.0 | 0.98 | 1624.3 | 71.4 | 1639.7 | 41.4 | 1659.4 | 19.9  | 1659.4 | 19.9  | 97.9        |
| CCR0310 - 32 | 111  | 54644   | 1.6  | 9.7430  | 2.0  | 3.9517  | 3.5  | 0.2792 | 2.9 | 0.83 | 1587.5 | 41.1 | 1624.3 | 28.5 | 1672.3 | 36.4  | 1672.3 | 36.4  | 94.9        |
| CCR0310 - 23 | 81   | 18321   | 1.5  | 9.6893  | 2.5  | 3.9292  | 3.0  | 0.2761 | 1.7 | 0.57 | 1571.8 | 24.0 | 1619.7 | 24.5 | 1682.6 | 45.8  | 1682.6 | 45.8  | 93.4        |
| CCR0310 - 40 | 433  | 230067  | 1.0  | 9.6127  | 0.8  | 4.3805  | 1.7  | 0.3054 | 1.5 | 0.89 | 1718.0 | 22.7 | 1708.7 | 14.0 | 1697.2 | 14.4  | 1697.2 | 14.4  | 101.2       |
| CCR0310-72   | 25   | 8871    | 2.6  | 9.5142  | 8.2  | 4.3878  | 9.5  | 0.3028 | 4.8 | 0.51 | 1705.0 | 72.1 | 1710.0 | 78.5 | 1716.2 | 150.4 | 1716.2 | 150.4 | 99.4        |
| CCR0310-105  | 151  | 43327   | 2.7  | 9.4690  | 1.7  | 4.3653  | 2.7  | 0.2998 | 2.2 | 0.79 | 1690.3 | 32.3 | 1705.8 | 22.6 | 1724.9 | 30.6  | 1724.9 | 30.6  | 98.0        |
| CCR0310-99   | 214  | 181124  | 4.3  | 9.4270  | 0.9  | 4.5562  | 1.9  | 0.3115 | 1.6 | 0.87 | 1748.1 | 24.7 | 1741.3 | 15.4 | 1733.1 | 16.6  | 1733.1 | 16.6  | 100.9       |
| CCR0310 - 14 | 333  | 156982  | 4.5  | 9.3294  | 0.3  | 4.4928  | 2.7  | 0.3040 | 2.7 | 1.00 | 1711.1 | 40.8 | 1729.6 | 22.6 | 1752.1 | 4.9   | 1752.1 | 4.9   | 97.7        |
| CCR0310 - 42 | 661  | 274391  | 8.5  | 9.3231  | 0.5  | 4.1167  | 2.3  | 0.2784 | 2.2 | 0.98 | 1583.1 | 31.0 | 1657.6 | 18.5 | 1753.4 | 8.9   | 1753.4 | 8.9   | 90.3        |
| CCR0310-58   | 307  | 161505  | 4.8  | 9.2145  | 0.5  | 4.6757  | 3.1  | 0.3125 | 3.0 | 0.98 | 1752.9 | 46.4 | 1762.9 | 25.7 | 1774.8 | 10.0  | 1774.8 | 10.0  | 98.8        |
| CCR0310 - 12 | 47   | 45268   | 1.8  | 8.8677  | 2.8  | 4.9893  | 3.8  | 0.3209 | 2.5 | 0.67 | 1794.1 | 39.6 | 1817.5 | 31.9 | 1844.5 | 50.5  | 1844.5 | 50.5  | 97.3        |
| CCR0310-77   | 136  | 41984   | 2.3  | 8.7470  | 1.9  | 5.1803  | 2.5  | 0.3286 | 1.6 | 0.64 | 1831.7 | 25.5 | 1849.4 | 21.1 | 1869.3 | 34.2  | 1869.3 | 34.2  | 98.0        |
| CCR0310-75   | 100  | 43505   | 1.9  | 8.6719  | 1.1  | 5.3628  | 3.4  | 0.3373 | 3.2 | 0.94 | 1873.6 | 51.3 | 1878.9 | 28.7 | 1884.8 | 20.7  | 1884.8 | 20.7  | 99.4        |
| CCR0310 - 33 | 80   | 50287   | 1.2  | 8.1437  | 1.1  | 5.8041  | 1.8  | 0.3428 | 1.4 | 0.79 | 1900.2 | 22.9 | 1947.0 | 15.3 | 1997.2 | 19.4  | 1997.2 | 19.4  | 95.1        |
| CCR0310-101  | 301  | 111452  | 2.6  | 7.7265  | 0.4  | 6.7713  | 1.3  | 0.3794 | 1.3 | 0.96 | 2073.7 | 22.8 | 2082.0 | 11.9 | 2090.2 | 6.8   | 2090.2 | 6.8   | 99.2        |
| CCR0310 - 36 | 434  | 165681  | 10.5 | 5.4267  | 0.3  | 12.8710 | 2.3  | 0.5066 | 2.3 | 0.99 | 2642.0 | 49.9 | 2670.3 | 21.8 | 2691.7 | 4.7   | 2691.7 | 4.7   | 98.2        |
| CCR0310 - 18 | 79   | 39311   | 3.4  | 5.3099  | 0.9  | 13.1853 | 2.6  | 0.5078 | 2.5 | 0.94 | 2647.1 | 53.6 | 2693.0 | 24.7 | 2727.6 | 14.2  | 2727.6 | 14.2  | 97.0        |
| CCR0310 - 17 | 596  | 436530  | 2.0  | 5.2901  | 0.2  | 12.9450 | 2.5  | 0.4967 | 2.5 | 1.00 | 2599.5 | 53.6 | 2675.7 | 23.7 | 2733.7 | 3.3   | 2733.7 | 3.3   | 95.1        |
| CCR0310-57   | 719  | 529161  | 0.7  | 5.0642  | 0.2  | 14.4028 | 2.8  | 0.5290 | 2.8 | 1.00 | 2737.2 | 62.4 | 2776.6 | 26.7 | 2805.3 | 4.0   | 2805.3 | 4.0   | 97.6        |
| CCR0310 - 35 | 126  | 138518  | 2.6  | 4.4280  | 0.4  | 18.4873 | 1.3  | 0.5937 | 1.3 | 0.95 | 3004.5 | 30.6 | 3015.4 | 12.9 | 3022.8 | 6.9   | 3022.8 | 6.9   | 99.4        |
|              |      |         |      |         |      |         |      |        |     |      |        |      |        |      |        |       |        |       |             |
| CCR0410 - 66 | 141  | 3476    | 1.8  | 20.6819 | 20.6 | 0.1888  | 21.3 | 0.0283 | 5.5 | 0.26 | 180.0  | 9.8  | 175.6  | 34.4 | 116.5  | 489.3 | 180.0  | 9.8   | NA 1.5, 1.0 |
| CCR0410 - 22 | 1316 | 29188   | 4.0  | 19.9251 | 2.9  | 0.2175  | 5.7  | 0.0314 | 4.9 | 0.86 | 199.5  | 9.7  | 199.9  | 10.4 | 203.7  | 68.1  | 199.5  | 9.7   | NA          |
| CCR0410 - 84 | 341  | 12587   | 4.5  | 18.9293 | 4.6  | 0.2783  | 5.2  | 0.0382 | 2.4 | 0.46 | 241.7  | 5.7  | 249.3  | 11.5 | 321.4  | 105.5 | 241.7  | 5.7   | NA          |
| CCR0410 - 40 | 173  | 10932   | 1.6  | 22.9296 | 25.2 | 0.2302  | 25.6 | 0.0383 | 4.5 | 0.18 | 242.1  | 10.8 | 210.3  | 48.6 | -132.5 | 630.4 | 242.1  | 10.8  | NA          |
| CCR0410 - 12 | 131  | 5253    | 1.8  | 18.8281 | 21.3 | 0.2818  | 21.6 | 0.0385 | 3.5 | 0.16 | 243.4  | 8.4  | 252.1  | 48.3 | 333.6  | 488.8 | 243.4  | 8.4   | NA          |
| CCR0410 - 96 | 230  | 14751   | 1.5  | 19.1130 | 6.3  | 0.3952  | 7.1  | 0.0548 | 3.4 | 0.48 | 343.9  | 11.5 | 338.2  | 20.5 | 299.4  | 142.7 | 343.9  | 11.5  | NA          |
| CCR0410 - 8  | 905  | 41139   | 1.3  | 18.6309 | 2.2  | 0.4303  | 3.1  | 0.0582 | 2.1 | 0.69 | 364.4  | 7.6  | 363.4  | 9.5  | 357.4  | 50.5  | 364.4  | 7.6   | NA          |
| CCR0410 - 1  | 46   | 7600    | 1.9  | 20.0276 | 17.1 | 0.4093  | 19.4 | 0.0595 | 9.2 | 0.47 | 372.3  | 33.3 | 348.4  | 57.4 | 191.8  | 400.8 | 372.3  | 33.3  | NA          |
| CCR0410 - 71 | 240  | 31376   | 1.6  | 18.4022 | 6.5  | 0.4485  | 8.8  | 0.0599 | 6.0 | 0.68 | 374.8  | 22.0 | 376.2  | 27.8 | 385.2  | 145.6 | 374.8  | 22.0  | NA          |
| CCR0410 - 93 | 248  | 30637   | 2.0  | 18.9782 | 4.1  | 0.4590  | 4.8  | 0.0632 | 2.5 | 0.51 | 394.9  | 9.4  | 383.6  | 15.4 | 315.5  | 94.0  | 394.9  | 9.4   | NA          |
| CCR0410 - 45 | 157  | 15577   | 1.9  | 17.3426 | 9.8  | 0.5026  | 10.8 | 0.0632 | 4.3 | 0.40 | 395.1  | 16.6 | 413.4  | 36.5 | 516.9  | 216.5 | 395.1  | 16.6  | NA          |
| CCR0410 - 3  | 300  | 35243   | 3.2  | 18.3920 | 3.5  | 0.4739  | 4.2  | 0.0632 | 2.3 | 0.55 | 395.2  | 8.9  | 393.9  | 13.6 | 386.4  | 78.2  | 395.2  | 8.9   | NA          |
| CCR0410 - 39 | 152  | 14977   | 1.2  | 17.6782 | 8.6  | 0.5071  | 9.5  | 0.0650 | 3.9 | 0.41 | 406.1  | 15.3 | 416.5  | 32.3 | 474.7  | 191.0 | 406.1  | 15.3  | NA          |
| CCR0410 - 14 | 593  | 91420   | 1.6  | 18.1467 | 2.5  | 0.4971  | 4.3  | 0.0654 | 3.6 | 0.82 | 408.6  | 14.1 | 409.8  | 14.6 | 416.5  | 55.8  | 408.6  | 14.1  | NA          |
| CCR0410 - 97 | 313  | 39981   | 1.4  | 17.3771 | 3.7  | 0.5576  | 4.5  | 0.0703 | 2.5 | 0.56 | 437.8  | 10.7 | 450.0  | 16.2 | 512.6  | 81.0  | 437.8  | 10.7  | NA          |
| CCR0410 - 81 | 202  | 19296   | 0.7  | 16.2780 | 6.0  | 0.7776  | 6.1  | 0.0918 | 1.3 | 0.22 | 566.2  | 7.2  | 584.1  | 27.2 | 654.4  | 128.1 | 566.2  | 7.2   | 86.5        |
| CCR0410 - 5  | 285  | 63388   | 3.2  | 14.8152 | 1.8  | 1.3543  | 3.7  | 0.1455 | 3.3 | 0.88 | 875.8  | 26.7 | 869.4  | 21.7 | 853.2  | 36.9  | 875.8  | 26.7  | 102.7       |
| CCR0410 - 78 | 86   | 16508   | 1.2  | 14.8509 | 5.6  | 1.3561  | 6.2  | 0.1461 | 2.5 | 0.41 | 878.9  | 20.8 | 870.2  | 36.1 | 848.2  | 117.1 | 878.9  | 20.8  | 103.6       |
| CCR0410 - 18 | 82   | 31133   | 2.2  | 14.1175 | 4.8  | 1.5801  | 5.1  | 0.1618 | 1.6 | 0.32 | 966.7  | 14.8 | 962.4  | 31.7 | 952.6  | 98.9  | 952.6  | 98.9  | 101.5       |
| CCR0410 - 72 | 82   | 23801   | 3.9  | 14.0535 | 4.6  | 1.6287  | 5.8  | 0.1660 | 3.5 | 0.60 | 990.1  | 31.8 | 981.4  | 36.3 | 961.9  | 94.3  | 961.9  | 94.3  | 102.9       |
| CCR0410 - 62 | 163  | 36482   | 2.0  | 13.9140 | 2.3  | 1.5784  | 3.3  | 0.1593 | 2.3 | 0.71 | 952.8  | 20.7 | 961.7  | 20.6 | 982.3  | 47.7  | 982.3  | 47.7  | 97.0        |
| CCR0410 - 25 | 180  | 29391   | 5.8  | 13.8928 | 2.0  | 1.5382  | 2.8  | 0.1550 | 2.0 | 0.70 | 928.9  | 17.3 | 945.8  | 17.5 | 985.4  | 41.3  | 985.4  | 41.3  | 94.3        |
| CCR0410 - 30 | 90   | 22511   | 3.1  | 13.8303 | 6.3  | 1.6392  | 7.2  | 0.1644 | 3.5 | 0.49 | 981.3  | 32.0 | 985.4  | 45.4 | 994.5  | 127.5 | 994.5  | 127.5 | 98.7        |
| CCR0410 - 87 | 206  | 37254   | 3.4  | 13.7953 | 1.9  | 1.6103  | 5.4  | 0.1611 | 5.0 | 0.93 | 963.0  | 44.9 | 974.2  | 33.7 | 999.7  | 38.8  | 999.7  | 38.8  | 96.3        |
| CCR0410 - 85 | 311  | 136604  | 2.9  | 13.7267 | 1.1  | 1.6147  | 2.3  | 0.1608 | 1.9 | 0.86 | 961.0  | 17.4 | 975.9  | 14.1 | 1009.8 | 23.0  | 1009.8 | 23.0  | 95.2        |
| CCR0410 - 57 | 172  | 107767  | 3.8  | 13.7208 | 2.5  | 1.6735  | 2.9  | 0.1665 | 1.4 | 0.49 | 993.0  | 13.3 | 998.5  | 18.6 | 1010.7 | 51.6  | 1010.7 | 51.6  | 98.2        |
| CCR0410 - 16 | 70   | 28476   | 1.7  | 13.6817 | 5.8  | 1.8085  | 6.6  | 0.1795 | 3.0 | 0.46 | 1064.0 | 29.6 | 1048.5 | 42.9 | 1016.4 | 118.2 | 1016.4 | 118.2 | 104.7       |
| CCR0410 - 67 | 144  | 20002   | 3.0  | 13.6735 | 2.2  | 1.6990  | 3.6  | 0.1685 | 2.8 | 0.80 | 1003.8 | 26.3 | 1008.2 | 22.7 | 1017.6 | 43.7  | 1017.6 | 43.7  | 98.6        |
| CCR0410 - 44 | 410  | 64396   | 3.6  | 13.6519 | 1.0  | 1.6329  | 2.3  | 0.1617 | 2.1 | 0.91 | 966.1  | 19.0 | 983.0  | 14.6 | 1020.9 | 19.5  | 1020.9 | 19.5  | 94.6        |
| CCR0410 - 7  | 126  | 31419   | 1.3  | 13.5988 | 2.1  | 1.6291  | 2.9  | 0.1607 | 1.9 | 0.68 | 960.5  | 17.3 | 981.5  | 18.0 | 1028.7 | 42.4  | 1028.7 | 42.4  | 93.4        |
| CCR0410 - 11 | 376  | 85642   | 5.9  | 13.5848 | 1.8  | 1.7055  | 3.7  | 0.1680 | 3.3 | 0.87 | 1001.3 | 30.3 | 1010.6 | 23.9 | 1030.8 | 36.5  | 1030.8 | 36.5  | 97.1        |
| CCR0410 - 77 | 200  | 35410   | 2.9  | 13.5284 | 2.8  | 1.7201  | 3.8  | 0.1688 | 2.5 | 0.67 | 1005.4 | 23.6 | 1016.1 | 24.1 | 1039.2 | 56.1  | 1039.2 | 56.1  | 96.7        |
| CCR0410 - 98 | 246  | 78072   | 2.0  | 13.4827 | 1.5  | 1.6544  | 3.2  | 0.1618 | 2.8 | 0.88 | 966.6  | 24.9 | 991.2  | 20.0 | 1046.1 | 30.4  | 1046.1 | 30.4  | 92.4        |
| CCR0410 - 50 | 93   | 35799   | 4.3  | 13.4748 | 4.1  | 1.7581  | 5.0  | 0.1718 | 2.9 | 0.59 | 1022.1 | 27.9 | 1030.2 | 32.6 | 1047.3 | 82.4  | 1047.3 | 82.4  | 97.6        |
| CCR0410 - 61 | 251  | 106830  | 3.5  | 13.4619 | 1.1  | 1.6494  | 1.9  | 0.1610 | 1.6 | 0.81 | 962.6  | 14.0 | 989.3  | 12.2 | 1049.2 | 23.0  | 1049.2 | 23.0  | 91.7        |
| CCR0410 - 48 | 196  | 72569   | 2.8  | 13.4585 | 1.8  | 1.7673  | 2.8  | 0.1725 | 2.1 | 0.76 | 1025.9 | 20.3 | 1033.5 | 18.2 | 1049.7 | 36.9  | 1049.7 | 36.9  | 97.7        |
| CCR0410 - 58 | 208  | 33058   | 2.1  | 13.     |      |         |      |        |     |      |        |      |        |      |        |       |        |       |             |

|               |      |       |      |         |      |        |      |        |     |      |        |      |        |       |        |       |        |      |       |
|---------------|------|-------|------|---------|------|--------|------|--------|-----|------|--------|------|--------|-------|--------|-------|--------|------|-------|
| HW1200108-28  | 839  | 10434 | 28.8 | 19.1615 | 2.4  | 0.3631 | 2.5  | 0.0505 | 0.9 | 0.35 | 317.4  | 2.7  | 314.5  | 6.8   | 293.7  | 53.9  | 317.4  | 2.7  | NA    |
| HW1200108-59  | 491  | 9568  | 4.5  | 17.4107 | 2.2  | 0.4282 | 2.2  | 0.0541 | 0.4 | 0.20 | 339.4  | 1.5  | 361.9  | 6.8   | 508.3  | 48.4  | 339.4  | 1.5  | NA    |
| HW1200108-97  | 450  | 1827  | 2.5  | 17.3544 | 6.1  | 0.4562 | 7.0  | 0.0574 | 3.4 | 0.49 | 359.9  | 12.0 | 381.6  | 22.3  | 515.4  | 134.3 | 359.9  | 12.0 | NA    |
| HW1200108-64  | 368  | 4854  | 1.1  | 18.6289 | 1.9  | 0.4560 | 2.4  | 0.0616 | 1.5 | 0.62 | 385.4  | 5.7  | 381.5  | 7.8   | 357.6  | 43.3  | 385.4  | 5.7  | NA    |
| HW1200108-39  | 236  | 5011  | 2.2  | 19.1223 | 1.7  | 0.4734 | 2.0  | 0.0657 | 1.1 | 0.54 | 409.9  | 4.4  | 393.5  | 6.7   | 298.3  | 39.2  | 409.9  | 4.4  | NA    |
| HW1200108-60  | 215  | 4612  | 4.3  | 18.6546 | 1.8  | 0.4888 | 2.9  | 0.0661 | 2.2 | 0.77 | 412.8  | 9.0  | 404.1  | 9.6   | 354.5  | 41.3  | 412.8  | 9.0  | NA    |
| HW1200108-47  | 697  | 3931  | 2.9  | 18.0919 | 1.0  | 0.5164 | 1.4  | 0.0678 | 1.0 | 0.69 | 422.6  | 3.9  | 422.7  | 4.8   | 423.3  | 22.6  | 422.6  | 3.9  | 99.8  |
| HW1200108-50  | 471  | 10696 | 39.2 | 18.1143 | 1.8  | 0.5262 | 2.4  | 0.0691 | 1.6 | 0.67 | 430.9  | 6.8  | 429.3  | 8.5   | 420.5  | 40.3  | 430.9  | 6.8  | 102.5 |
| HW1200108-37  | 583  | 1896  | 1.0  | 17.0219 | 34.9 | 0.5648 | 34.9 | 0.0697 | 2.4 | 0.07 | 434.5  | 10.0 | 454.7  | 128.8 | 557.8  | 782.6 | 434.5  | 10.0 | NA    |
| HW1200108-38  | 461  | 17594 | 2.0  | 17.8327 | 1.1  | 0.5834 | 1.9  | 0.0754 | 1.5 | 0.82 | 468.9  | 6.9  | 466.6  | 7.0   | 455.4  | 24.1  | 468.9  | 6.9  | 103.0 |
| HW1200108-78  | 177  | 4000  | 1.6  | 18.9312 | 2.2  | 0.5507 | 2.3  | 0.0756 | 0.8 | 0.35 | 469.9  | 3.7  | 445.5  | 8.4   | 321.2  | 49.9  | 469.9  | 3.7  | NA    |
| HW1200108-96  | 134  | 2148  | 1.2  | 18.5272 | 3.6  | 0.5928 | 4.1  | 0.0797 | 2.1 | 0.50 | 494.1  | 9.8  | 472.7  | 15.5  | 370.0  | 80.1  | 494.1  | 9.8  | NA    |
| HW1200108-56  | 87   | 3318  | 1.3  | 17.2844 | 1.7  | 0.7203 | 2.6  | 0.0903 | 2.0 | 0.76 | 557.3  | 10.4 | 550.9  | 10.9  | 524.3  | 36.3  | 557.3  | 10.4 | NA    |
| HW1200108-20  | 119  | 5330  | 1.4  | 16.4732 | 2.6  | 0.8170 | 2.8  | 0.0976 | 1.1 | 0.39 | 600.4  | 6.2  | 606.4  | 12.8  | 628.8  | 55.6  | 600.4  | 6.2  | 95.5  |
| HW1200108-45  | 155  | 5327  | 1.4  | 15.9829 | 1.1  | 0.8653 | 1.7  | 0.1003 | 1.2 | 0.73 | 616.2  | 7.2  | 633.0  | 7.9   | 693.6  | 24.4  | 616.2  | 7.2  | 88.8  |
| HW1200108-30  | 110  | 4605  | 0.9  | 16.3431 | 2.2  | 0.8475 | 2.4  | 0.1005 | 1.0 | 0.42 | 617.1  | 5.9  | 623.3  | 11.1  | 645.9  | 46.5  | 617.1  | 5.9  | 95.5  |
| HW1200108-94  | 103  | 4168  | 1.0  | 15.9927 | 1.8  | 0.8832 | 2.1  | 0.1024 | 1.0 | 0.48 | 628.7  | 6.1  | 642.7  | 10.0  | 692.2  | 39.5  | 628.7  | 6.1  | 90.8  |
| HW1200108-2   | 221  | 9320  | 3.4  | 16.0482 | 1.9  | 0.9523 | 2.1  | 0.1108 | 1.0 | 0.48 | 677.6  | 6.6  | 679.3  | 10.6  | 684.9  | 39.9  | 677.6  | 6.6  | 98.9  |
| HW1200108-48  | 135  | 7796  | 2.5  | 13.9620 | 1.1  | 1.6222 | 1.7  | 0.1643 | 1.4 | 0.79 | 980.4  | 12.6 | 978.8  | 10.9  | 975.2  | 21.5  | 975.2  | 21.5 | 100.5 |
| HW1200108-42  | 47   | 3908  | 2.2  | 13.7864 | 3.4  | 1.6392 | 3.9  | 0.1639 | 1.8 | 0.46 | 978.4  | 16.2 | 985.4  | 24.3  | 1001.0 | 69.4  | 1001.0 | 69.4 | 97.7  |
| HW1200108-44  | 58   | 2835  | 1.0  | 13.7552 | 4.3  | 1.6150 | 7.1  | 0.1611 | 5.6 | 0.79 | 963.0  | 50.3 | 976.0  | 44.4  | 1005.6 | 87.2  | 1005.6 | 87.2 | 95.8  |
| HW1200108-46  | 108  | 8554  | 1.8  | 13.7506 | 1.2  | 1.6726 | 1.8  | 0.1668 | 1.3 | 0.73 | 994.5  | 11.9 | 998.2  | 11.3  | 1006.3 | 24.7  | 1006.3 | 24.7 | 98.8  |
| HW1200108-63  | 129  | 7073  | 3.8  | 13.6525 | 1.0  | 1.6890 | 3.2  | 0.1672 | 3.0 | 0.95 | 996.9  | 27.8 | 1004.4 | 20.3  | 1020.8 | 21.1  | 1020.8 | 21.1 | 97.7  |
| HW1200108-3   | 30   | 7709  | 2.0  | 13.6332 | 3.7  | 1.6413 | 3.8  | 0.1623 | 0.9 | 0.23 | 969.5  | 7.7  | 986.2  | 23.7  | 1023.6 | 74.1  | 1023.6 | 74.1 | 94.7  |
| HW1200108-54  | 126  | 5626  | 2.7  | 13.6099 | 1.3  | 1.7668 | 1.5  | 0.1744 | 0.8 | 0.50 | 1036.3 | 7.2  | 1033.3 | 9.6   | 1027.1 | 26.0  | 1027.1 | 26.0 | 100.9 |
| HW1200108-90  | 237  | 15581 | 1.5  | 13.6050 | 1.1  | 1.7208 | 1.5  | 0.1698 | 1.0 | 0.70 | 1011.0 | 9.6  | 1016.3 | 9.5   | 1027.8 | 21.3  | 1027.8 | 21.3 | 98.4  |
| HW1200108-43  | 211  | 13917 | 9.1  | 13.5758 | 1.3  | 1.7933 | 2.0  | 0.1766 | 1.6 | 0.76 | 1048.2 | 15.0 | 1043.0 | 13.3  | 1032.2 | 27.0  | 1032.2 | 27.0 | 101.6 |
| HW1200108-41  | 328  | 7520  | 6.5  | 13.5373 | 1.1  | 1.7162 | 2.1  | 0.1685 | 1.8 | 0.84 | 1003.8 | 16.6 | 1014.6 | 13.6  | 1037.9 | 22.9  | 1037.9 | 22.9 | 96.7  |
| HW1200108-99  | 178  | 9006  | 1.6  | 13.5039 | 2.0  | 1.8171 | 3.4  | 0.1780 | 2.8 | 0.82 | 1055.8 | 27.0 | 1051.6 | 22.2  | 1042.9 | 39.5  | 1042.9 | 39.5 | 101.2 |
| HW1200108-86  | 132  | 8332  | 6.1  | 13.4907 | 1.3  | 1.7821 | 1.7  | 0.1744 | 1.1 | 0.64 | 1036.1 | 10.4 | 1038.9 | 11.1  | 1044.9 | 26.5  | 1044.9 | 26.5 | 99.2  |
| HW1200108-82  | 152  | 4095  | 1.3  | 13.4710 | 4.4  | 1.8212 | 4.6  | 0.1779 | 1.4 | 0.30 | 1055.7 | 13.4 | 1053.1 | 30.4  | 1047.8 | 89.2  | 1047.8 | 89.2 | 100.7 |
| HW1200108-18  | 91   | 7902  | 4.5  | 13.4672 | 1.7  | 1.8580 | 1.9  | 0.1815 | 0.9 | 0.45 | 1075.0 | 8.6  | 1066.3 | 12.7  | 1048.4 | 34.6  | 1048.4 | 34.6 | 102.5 |
| HW1200108-70  | 1288 | 40791 | 6.4  | 13.4304 | 0.8  | 1.7560 | 2.2  | 0.1710 | 2.1 | 0.94 | 1017.9 | 19.7 | 1029.4 | 14.4  | 1053.9 | 15.7  | 1053.9 | 15.7 | 96.6  |
| HW1200108-24  | 242  | 13955 | 3.5  | 13.3811 | 2.7  | 1.8634 | 3.2  | 0.1808 | 1.8 | 0.54 | 1071.6 | 17.5 | 1068.2 | 21.5  | 1061.3 | 54.9  | 1061.3 | 54.9 | 101.0 |
| HW1200108-67  | 134  | 2387  | 1.6  | 13.2809 | 1.9  | 1.9118 | 2.1  | 0.1842 | 0.9 | 0.45 | 1089.6 | 9.3  | 1085.2 | 13.9  | 1076.4 | 37.3  | 1076.4 | 37.3 | 101.2 |
| HW1200108-76  | 138  | 9503  | 3.3  | 13.2737 | 1.4  | 1.8618 | 1.8  | 0.1792 | 1.1 | 0.60 | 1062.8 | 10.4 | 1067.6 | 11.7  | 1077.5 | 28.3  | 1077.5 | 28.3 | 98.6  |
| HW1200108-40  | 136  | 6192  | 2.0  | 13.2663 | 2.7  | 1.7801 | 3.2  | 0.1713 | 1.6 | 0.50 | 1019.1 | 14.8 | 1038.2 | 20.5  | 1078.6 | 54.9  | 1078.6 | 54.9 | 94.5  |
| HW1200108-1   | 298  | 6858  | 2.5  | 13.2612 | 4.5  | 1.7256 | 4.7  | 0.1660 | 1.5 | 0.32 | 989.9  | 13.7 | 1018.1 | 30.2  | 1079.4 | 89.4  | 1079.4 | 89.4 | 91.7  |
| HW1200108-58  | 133  | 9821  | 0.9  | 13.0852 | 1.4  | 1.5594 | 1.5  | 0.1480 | 0.5 | 0.36 | 889.7  | 4.5  | 954.2  | 9.3   | 1106.2 | 27.9  | 1106.2 | 27.9 | 80.4  |
| HW1200108-52  | 77   | 3470  | 2.1  | 13.0268 | 1.6  | 1.8869 | 1.9  | 0.1783 | 1.0 | 0.54 | 1057.5 | 9.9  | 1076.5 | 12.5  | 1115.1 | 31.7  | 1115.1 | 31.7 | 94.8  |
| HW1200108-33  | 505  | 31246 | 3.2  | 13.0084 | 0.9  | 2.0012 | 2.1  | 0.1888 | 1.9 | 0.89 | 1114.9 | 18.9 | 1115.9 | 14.0  | 1117.9 | 18.7  | 1117.9 | 18.7 | 99.7  |
| HW1200108-16  | 71   | 5081  | 3.1  | 13.0055 | 1.1  | 1.9749 | 1.4  | 0.1863 | 0.9 | 0.63 | 1101.2 | 9.2  | 1107.0 | 9.8   | 1118.4 | 22.5  | 1118.4 | 22.5 | 98.5  |
| HW1200108-91  | 212  | 16123 | 1.9  | 12.9904 | 1.0  | 2.0451 | 1.5  | 0.1927 | 1.2 | 0.78 | 1135.9 | 12.6 | 1130.7 | 10.5  | 1120.7 | 19.1  | 1120.7 | 19.1 | 101.4 |
| HW1200108-88  | 183  | 11533 | 2.2  | 12.9727 | 1.0  | 2.0817 | 2.4  | 0.1959 | 2.2 | 0.91 | 1153.0 | 23.2 | 1142.8 | 16.7  | 1123.4 | 20.5  | 1123.4 | 20.5 | 102.6 |
| HW1200108-95  | 145  | 7252  | 1.8  | 12.8764 | 1.4  | 2.0292 | 2.5  | 0.1895 | 2.1 | 0.82 | 1118.7 | 21.3 | 1125.3 | 17.1  | 1138.2 | 28.4  | 1138.2 | 28.4 | 98.3  |
| HW1200108-61  | 150  | 6022  | 0.9  | 12.8635 | 4.6  | 2.1081 | 5.1  | 0.1967 | 2.3 | 0.44 | 1157.4 | 23.8 | 1151.5 | 35.1  | 1140.2 | 91.0  | 1140.2 | 91.0 | 101.5 |
| HW1200108-7   | 341  | 23949 | 3.3  | 12.7330 | 1.7  | 2.1044 | 1.9  | 0.1943 | 0.9 | 0.47 | 1144.8 | 9.4  | 1150.2 | 13.2  | 1160.4 | 33.8  | 1160.4 | 33.8 | 98.7  |
| HW1200108-98  | 64   | 2287  | 1.7  | 12.7146 | 3.5  | 2.0919 | 3.6  | 0.1929 | 0.9 | 0.26 | 1137.1 | 9.7  | 1146.1 | 24.6  | 1163.3 | 68.5  | 1163.3 | 68.5 | 97.7  |
| HW1200108-100 | 114  | 7192  | 3.2  | 12.6511 | 0.8  | 2.1420 | 1.6  | 0.1965 | 1.4 | 0.86 | 1156.7 | 15.0 | 1162.5 | 11.4  | 1173.3 | 16.5  | 1173.3 | 16.5 | 98.6  |
| HW1200108-93  | 129  | 10203 | 3.4  | 12.6369 | 0.8  | 2.2308 | 1.5  | 0.2045 | 1.3 | 0.86 | 1199.2 | 14.4 | 1190.8 | 10.8  | 1175.5 | 15.6  | 1175.5 | 15.6 | 102.0 |
| HW1200108-6   | 228  | 5643  | 2.6  | 12.6138 | 2.1  | 2.0990 | 2.8  | 0.1920 | 1.9 | 0.65 | 1132.3 | 19.2 | 1148.5 | 19.5  | 1179.1 | 42.5  | 1179.1 | 42.5 | 96.0  |
| HW1200108-8   | 672  | 32817 | 13.0 | 12.5955 | 2.2  | 2.0876 | 2.5  | 0.1907 | 1.3 | 0.50 | 1125.2 | 13.0 | 1144.7 | 17.2  | 1182.0 | 42.7  | 1182.0 | 42.7 | 95.2  |
| HW1200108-36  | 147  | 9908  | 2.5  | 12.5653 | 0.8  | 2.2144 | 1.9  | 0.2018 | 1.8 | 0.91 | 1185.0 | 19.2 | 1185.6 | 13.6  | 1186.7 | 15.9  | 1186.7 | 15.9 | 99.9  |
| HW1200108-14  | 85   | 7046  | 3.2  | 12.4817 | 2.1  | 2.1839 | 2.4  | 0.1977 | 1.2 | 0.49 | 1163.0 | 12.2 | 1175.9 | 16.5  | 1199.9 | 40.8  | 1199.9 | 40.8 | 96.9  |
| HW1200108-74  | 104  | 8674  | 2.6  | 12.3819 | 1.6  | 2.2751 | 2.3  | 0.2043 | 1.7 | 0.73 | 1198.4 | 18.4 | 1204.6 | 16.3  | 1215.7 | 31.4  | 1215.7 | 31.4 | 98.6  |
| HW1200108-92  | 170  | 5401  | 2.6  | 12.3770 | 2.2  | 2.3208 | 2.9  | 0.2083 | 2.0 | 0.68 | 1219.9 | 22.3 | 1218.7 | 20.9  | 1216.5 | 42.4  | 1216.5 | 42.4 | 100.3 |
| HW1200108-80  | 202  | 10523 | 3.1  | 12.3433 | 1.5  | 2.2181 | 2.3  | 0.1986 | 1.7 | 0.76 | 1167.6 | 18.3 | 1186.8 | 15.8  | 1221.8 | 28.8  | 1221.8 | 28.8 | 95.6  |
| HW1200108-12  | 29   | 6644  | 3.4  | 12.2910 | 2.5  | 2.3435 | 2.8  | 0.2089 | 1.2 | 0.43 | 1223.0 | 13.5 | 1225.6 | 19.9  | 1230.2 | 49.5  | 1230.2 | 49.5 | 99.4  |
| HW1200108-9   | 187  | 13761 | 2.8  | 12.2779 | 1.3  | 2.3619 | 1.4  | 0.2103 | 0.5 | 0.36 | 1230.5 | 5.6  | 1231.2 | 10.0  | 1232.3 | 25.8  | 1232.3 | 25.8 | 99.9  |
| HW1200108-27  | 17   | 6920  | 2.3  | 12.2299 | 3.1  | 2.1893 | 3.9  | 0.1942 | 2.3 | 0.59 | 1144.0 | 23.9 | 1177.7 | 27.0  | 1239.9 | 61.3  | 1239.9 | 61.3 | 92.3  |
| HW1200108-32  | 57   | 4905  | 4.0  | 12.1277 | 1.9  | 2.3504 | 2.1  | 0.2067 | 0.8 | 0.40 | 1211.4 | 9.2  | 1227.7 | 14.8  | 1256.4 | 37.3  | 1256.4 | 37.3 | 96.4  |
| HW1200108-23  | 272  | 15285 | 3.6  | 12.0928 | 0.8  | 2.4839 | 1.6  | 0.2178 | 1.3 | 0.86 | 1270.5 | 15.5 | 1267.3 | 11.3  | 1262.0 | 15.6  | 1262.0 | 15.6 | 100.7 |
| HW1200108-75  | 178  | 5685  | 2.0  | 11      |      |        |      |        |     |      |        |      |        |       |        |       |        |      |       |



|               |     |       |      |         |      |        |      |        |     |      |        |       |        |      |        |       |        |       |       |
|---------------|-----|-------|------|---------|------|--------|------|--------|-----|------|--------|-------|--------|------|--------|-------|--------|-------|-------|
| HW1200208-61  | 305 | 20013 | 2.7  | 13.5334 | 2.1  | 1.6801 | 2.4  | 0.1649 | 1.1 | 0.47 | 984.0  | 10.3  | 1001.0 | 15.2 | 1038.5 | 42.4  | 1038.5 | 42.4  | 94.8  |
| HW1200208-37  | 197 | 24354 | 3.1  | 13.4861 | 1.1  | 1.8141 | 1.6  | 0.1774 | 1.2 | 0.74 | 1053.0 | 11.5  | 1050.6 | 10.4 | 1045.6 | 21.4  | 1045.6 | 21.4  | 100.7 |
| HW1200208-70  | 340 | 52545 | 0.7  | 13.4357 | 1.4  | 1.7157 | 1.7  | 0.1672 | 0.9 | 0.54 | 996.6  | 8.3   | 1014.4 | 10.6 | 1053.1 | 28.0  | 1053.1 | 28.0  | 94.6  |
| HW1200208-16  | 139 | 16998 | 2.8  | 13.4297 | 1.2  | 1.7267 | 1.9  | 0.1682 | 1.4 | 0.75 | 1002.1 | 13.1  | 1018.5 | 12.0 | 1054.0 | 24.7  | 1054.0 | 24.7  | 95.1  |
| HW1200208-90  | 60  | 10179 | 1.5  | 13.4271 | 1.2  | 1.6222 | 3.1  | 0.1580 | 2.9 | 0.92 | 945.5  | 25.2  | 978.8  | 19.6 | 1054.4 | 24.9  | 1054.4 | 24.9  | 89.7  |
| HW1200208-21  | 198 | 27708 | 1.9  | 13.4183 | 1.6  | 1.7237 | 2.9  | 0.1677 | 2.4 | 0.82 | 999.7  | 22.0  | 1017.4 | 18.6 | 1055.7 | 33.0  | 1055.7 | 33.0  | 94.7  |
| HW1200208-57  | 296 | 63375 | 2.5  | 13.3523 | 1.3  | 1.7845 | 2.5  | 0.1728 | 2.1 | 0.85 | 1027.6 | 20.1  | 1039.8 | 16.2 | 1065.7 | 26.3  | 1065.7 | 26.3  | 96.4  |
| HW1200208-95  | 100 | 13179 | 3.8  | 13.3465 | 1.3  | 1.7450 | 2.3  | 0.1689 | 1.9 | 0.81 | 1006.1 | 17.5  | 1025.3 | 14.9 | 1066.5 | 26.9  | 1066.5 | 26.9  | 94.3  |
| HW1200208-50  | 160 | 18231 | 3.2  | 13.3410 | 1.0  | 1.8339 | 2.0  | 0.1774 | 1.7 | 0.86 | 1053.0 | 16.6  | 1057.7 | 13.1 | 1067.4 | 20.6  | 1067.4 | 20.6  | 98.7  |
| HW1200208-83  | 95  | 23277 | 2.6  | 13.3314 | 1.9  | 1.7720 | 2.5  | 0.1713 | 1.6 | 0.64 | 1019.4 | 14.9  | 1035.2 | 16.0 | 1068.8 | 37.9  | 1068.8 | 37.9  | 95.4  |
| HW1200208-28  | 155 | 23541 | 1.7  | 13.3232 | 1.3  | 1.8170 | 1.8  | 0.1756 | 1.2 | 0.65 | 1042.7 | 11.1  | 1051.6 | 11.6 | 1070.1 | 27.1  | 1070.1 | 27.1  | 97.4  |
| HW1200208-53  | 290 | 52533 | 2.2  | 13.3172 | 1.5  | 1.8052 | 1.8  | 0.1744 | 1.0 | 0.57 | 1036.1 | 9.7   | 1047.3 | 11.6 | 1071.0 | 29.4  | 1071.0 | 29.4  | 96.7  |
| HW1200208-13  | 77  | 16050 | 2.0  | 13.2781 | 1.6  | 2.0294 | 2.0  | 0.1954 | 1.2 | 0.61 | 1150.7 | 13.1  | 1125.4 | 13.8 | 1076.9 | 32.4  | 1076.9 | 32.4  | 106.9 |
| HW1200208-97  | 70  | 13398 | 1.4  | 13.2741 | 1.4  | 1.8666 | 1.8  | 0.1797 | 1.1 | 0.62 | 1065.4 | 10.9  | 1069.3 | 11.8 | 1077.5 | 28.1  | 1077.5 | 28.1  | 98.9  |
| HW1200208-1   | 130 | 16695 | 0.9  | 13.2238 | 0.8  | 1.8787 | 1.7  | 0.1802 | 1.6 | 0.90 | 1068.0 | 15.3  | 1073.6 | 11.5 | 1085.1 | 15.3  | 1085.1 | 15.3  | 98.4  |
| HW1200208-23  | 490 | 82950 | 4.7  | 13.2149 | 0.9  | 1.9040 | 3.0  | 0.1825 | 2.9 | 0.96 | 1080.5 | 28.9  | 1082.5 | 20.3 | 1086.4 | 17.8  | 1086.4 | 17.8  | 99.5  |
| HW1200208-33  | 427 | 71856 | 0.6  | 13.2145 | 1.2  | 1.8222 | 1.4  | 0.1746 | 0.8 | 0.56 | 1037.6 | 7.8   | 1053.5 | 9.4  | 1086.4 | 23.8  | 1086.4 | 23.8  | 95.5  |
| HW1200208-47  | 92  | 15165 | 1.2  | 13.0941 | 1.2  | 1.9672 | 2.0  | 0.1868 | 1.6 | 0.79 | 1104.1 | 15.7  | 1104.4 | 13.2 | 1104.8 | 24.0  | 1104.8 | 24.0  | 99.9  |
| HW1200208-7   | 678 | 85110 | 10.4 | 13.0832 | 1.0  | 1.9800 | 3.0  | 0.1879 | 2.8 | 0.94 | 1109.9 | 28.9  | 1108.7 | 20.2 | 1106.5 | 19.6  | 1106.5 | 19.6  | 100.3 |
| HW1200208-8   | 569 | 84900 | 14.5 | 13.0667 | 1.0  | 1.8599 | 1.8  | 0.1763 | 1.5 | 0.83 | 1046.5 | 14.6  | 1067.0 | 12.1 | 1109.0 | 20.6  | 1109.0 | 20.6  | 94.4  |
| HW1200208-31  | 174 | 40776 | 3.4  | 13.0456 | 2.0  | 1.9834 | 2.8  | 0.1877 | 1.9 | 0.69 | 1108.7 | 19.6  | 1109.9 | 18.9 | 1112.2 | 40.7  | 1112.2 | 40.7  | 99.7  |
| HW1200208-52  | 291 | 51573 | 2.5  | 13.0410 | 1.3  | 1.9909 | 3.1  | 0.1883 | 2.9 | 0.91 | 1112.2 | 29.1  | 1112.4 | 21.2 | 1112.9 | 25.8  | 1112.9 | 25.8  | 99.9  |
| HW1200208-92  | 97  | 29346 | 3.2  | 12.9865 | 1.8  | 2.0322 | 2.1  | 0.1914 | 1.0 | 0.49 | 1129.0 | 10.6  | 1126.3 | 14.2 | 1121.3 | 36.2  | 1121.3 | 36.2  | 100.7 |
| HW1200208-98  | 246 | 44067 | 1.5  | 12.9829 | 1.3  | 1.9207 | 2.1  | 0.1809 | 1.6 | 0.78 | 1071.6 | 16.2  | 1088.3 | 14.1 | 1121.8 | 26.3  | 1121.8 | 26.3  | 95.5  |
| HW1200208-64  | 583 | 36642 | 2.4  | 12.8817 | 2.2  | 1.8806 | 2.5  | 0.1757 | 1.2 | 0.46 | 1043.4 | 11.2  | 1074.3 | 16.6 | 1137.4 | 44.2  | 1137.4 | 44.2  | 91.7  |
| HW1200208-19  | 48  | 9342  | 3.8  | 12.8393 | 2.6  | 1.6499 | 2.9  | 0.1536 | 1.4 | 0.47 | 921.3  | 11.8  | 989.5  | 18.4 | 1143.9 | 51.2  | 1143.9 | 51.2  | 80.5  |
| HW1200208-99  | 85  | 22239 | 3.5  | 12.8384 | 1.8  | 1.9750 | 2.8  | 0.1839 | 2.2 | 0.78 | 1088.2 | 21.7  | 1107.0 | 18.9 | 1144.1 | 35.1  | 1144.1 | 35.1  | 95.1  |
| HW1200208-80  | 94  | 17055 | 2.3  | 12.8331 | 1.3  | 1.8603 | 4.6  | 0.1731 | 4.4 | 0.96 | 1029.4 | 41.4  | 1067.1 | 30.1 | 1144.9 | 26.5  | 1144.9 | 26.5  | 89.9  |
| HW1200208-3   | 96  | 19404 | 1.0  | 12.8231 | 1.1  | 2.0927 | 1.7  | 0.1946 | 1.3 | 0.78 | 1146.4 | 14.1  | 1146.4 | 11.8 | 1146.5 | 21.5  | 1146.5 | 21.5  | 100.0 |
| HW1200208-59  | 475 | 87588 | 2.8  | 12.7626 | 1.9  | 2.0413 | 2.2  | 0.1889 | 1.0 | 0.47 | 1115.7 | 10.4  | 1129.4 | 14.9 | 1155.8 | 38.5  | 1155.8 | 38.5  | 96.5  |
| HW1200208-84  | 795 | 98751 | 2.5  | 12.7156 | 3.5  | 2.0931 | 4.0  | 0.1930 | 1.9 | 0.47 | 1137.8 | 19.5  | 1146.5 | 27.2 | 1163.2 | 69.2  | 1163.2 | 69.2  | 97.8  |
| HW1200208-39  | 73  | 11742 | 6.1  | 12.6992 | 7.0  | 2.1503 | 7.2  | 0.1980 | 1.7 | 0.23 | 1164.8 | 18.0  | 1165.1 | 50.0 | 1165.7 | 139.1 | 1165.7 | 139.1 | 99.9  |
| HW1200208-88  | 192 | 29643 | 2.8  | 12.6529 | 1.6  | 1.9891 | 2.0  | 0.1825 | 1.2 | 0.61 | 1080.8 | 12.3  | 1111.8 | 13.8 | 1173.0 | 32.1  | 1173.0 | 32.1  | 92.1  |
| HW1200208-11  | 47  | 13530 | 2.3  | 12.6436 | 2.5  | 2.1323 | 2.9  | 0.1955 | 1.5 | 0.50 | 1151.3 | 15.3  | 1159.3 | 19.9 | 1174.4 | 49.4  | 1174.4 | 49.4  | 98.0  |
| HW1200208-87  | 393 | 36372 | 1.7  | 12.6345 | 1.6  | 2.0247 | 2.0  | 0.1855 | 1.2 | 0.60 | 1097.1 | 11.8  | 1123.8 | 13.3 | 1175.9 | 30.9  | 1175.9 | 30.9  | 93.3  |
| HW1200208-22  | 232 | 45711 | 4.2  | 12.6304 | 1.4  | 2.1190 | 1.6  | 0.1941 | 0.8 | 0.49 | 1143.6 | 8.1   | 1155.0 | 10.8 | 1176.5 | 27.1  | 1176.5 | 27.1  | 97.2  |
| HW1200208-17  | 106 | 29469 | 2.7  | 12.6107 | 1.0  | 2.1995 | 1.7  | 0.2012 | 1.4 | 0.82 | 1181.6 | 15.4  | 1180.9 | 12.2 | 1179.6 | 19.7  | 1179.6 | 19.7  | 100.2 |
| HW1200208-5   | 180 | 37620 | 2.7  | 12.4742 | 1.4  | 2.2459 | 1.5  | 0.2032 | 0.6 | 0.41 | 1192.4 | 6.6   | 1195.5 | 10.5 | 1201.1 | 26.8  | 1201.1 | 26.8  | 99.3  |
| HW1200208-81  | 492 | 57207 | 2.1  | 12.4583 | 6.3  | 2.0702 | 6.4  | 0.1871 | 0.9 | 0.14 | 1105.4 | 9.0   | 1139.0 | 43.6 | 1203.6 | 124.3 | 1203.6 | 124.3 | 91.8  |
| HW1200208-100 | 826 | 18870 | 5.8  | 12.4060 | 3.3  | 1.6848 | 4.9  | 0.1516 | 3.5 | 0.73 | 909.9  | 30.0  | 1002.8 | 31.0 | 1211.9 | 65.6  | 1211.9 | 65.6  | 75.1  |
| HW1200208-91  | 393 | 48357 | 1.4  | 12.3437 | 1.4  | 2.2672 | 2.5  | 0.2030 | 2.1 | 0.83 | 1191.3 | 23.0  | 1202.2 | 17.8 | 1221.7 | 27.6  | 1221.7 | 27.6  | 97.5  |
| HW1200208-76  | 221 | 59601 | 4.5  | 12.2154 | 0.9  | 2.3218 | 1.7  | 0.2057 | 1.4 | 0.85 | 1205.9 | 15.7  | 1219.0 | 12.0 | 1242.2 | 17.7  | 1242.2 | 17.7  | 97.1  |
| HW1200208-38  | 374 | 59928 | 1.8  | 12.1657 | 1.0  | 2.4099 | 2.3  | 0.2126 | 2.1 | 0.91 | 1242.8 | 23.6  | 1245.5 | 16.5 | 1250.3 | 19.0  | 1250.3 | 19.0  | 99.4  |
| HW1200208-42  | 158 | 22374 | 5.4  | 12.1520 | 2.0  | 2.4672 | 2.8  | 0.2174 | 1.9 | 0.68 | 1268.4 | 21.6  | 1262.5 | 20.0 | 1252.4 | 39.7  | 1252.4 | 39.7  | 101.3 |
| HW1200208-43  | 112 | 19845 | 1.7  | 12.0745 | 1.9  | 2.4521 | 2.0  | 0.2147 | 0.7 | 0.33 | 1254.0 | 7.7   | 1258.0 | 14.8 | 1265.0 | 37.7  | 1265.0 | 37.7  | 99.1  |
| HW1200208-58  | 402 | 86943 | 3.3  | 12.0492 | 4.5  | 2.0540 | 6.2  | 0.1795 | 4.3 | 0.69 | 1064.2 | 42.1  | 1133.6 | 42.3 | 1269.1 | 87.3  | 1269.1 | 87.3  | 83.9  |
| HW1200208-74  | 54  | 14682 | 2.2  | 12.0040 | 1.1  | 2.4646 | 2.4  | 0.2146 | 2.1 | 0.88 | 1253.1 | 24.3  | 1261.7 | 17.5 | 1276.4 | 22.4  | 1276.4 | 22.4  | 98.2  |
| HW1200208-46  | 105 | 16194 | 1.3  | 11.6927 | 2.3  | 2.5418 | 4.8  | 0.2156 | 4.3 | 0.88 | 1258.3 | 48.6  | 1284.1 | 35.1 | 1327.4 | 44.1  | 1327.4 | 44.1  | 94.8  |
| HW1200208-48  | 534 | 29751 | 1.6  | 11.6830 | 2.9  | 2.4839 | 3.1  | 0.2105 | 1.2 | 0.38 | 1231.3 | 13.3  | 1267.4 | 22.8 | 1329.0 | 56.4  | 1329.0 | 56.4  | 92.6  |
| HW1200208-27  | 70  | 21216 | 2.6  | 11.6368 | 1.9  | 2.5953 | 4.2  | 0.2190 | 3.7 | 0.89 | 1276.8 | 43.1  | 1299.3 | 30.5 | 1336.7 | 35.9  | 1336.7 | 35.9  | 95.5  |
| HW1200208-94  | 60  | 18198 | 4.9  | 11.5834 | 1.7  | 2.6937 | 3.2  | 0.2263 | 2.8 | 0.85 | 1315.1 | 32.8  | 1326.7 | 24.0 | 1345.6 | 32.7  | 1345.6 | 32.7  | 97.7  |
| HW1200208-67  | 175 | 49830 | 3.0  | 11.3934 | 3.0  | 2.7179 | 5.7  | 0.2246 | 4.9 | 0.85 | 1306.1 | 57.3  | 1333.4 | 42.4 | 1377.4 | 58.1  | 1377.4 | 58.1  | 94.8  |
| HW1200208-56  | 182 | 31191 | 4.1  | 11.3888 | 1.9  | 2.6988 | 2.3  | 0.2229 | 1.4 | 0.59 | 1297.3 | 16.3  | 1328.1 | 17.3 | 1378.2 | 36.2  | 1378.2 | 36.2  | 94.1  |
| HW1200208-45  | 280 | 13401 | 1.0  | 11.0541 | 0.8  | 2.7117 | 2.9  | 0.2174 | 2.8 | 0.97 | 1268.1 | 32.6  | 1331.7 | 21.8 | 1435.3 | 14.6  | 1435.3 | 14.6  | 88.4  |
| HW1200208-77  | 37  | 20133 | 4.0  | 11.0413 | 2.2  | 3.0763 | 2.8  | 0.2463 | 1.7 | 0.60 | 1419.6 | 21.4  | 1426.8 | 21.5 | 1437.5 | 42.9  | 1437.5 | 42.9  | 98.8  |
| HW1200208-65  | 42  | 12516 | 3.6  | 10.9871 | 1.9  | 3.1690 | 3.0  | 0.2525 | 2.4 | 0.78 | 1451.5 | 30.8  | 1449.6 | 23.4 | 1446.9 | 35.9  | 1446.9 | 35.9  | 100.3 |
| HW1200208-66  | 146 | 38922 | 3.0  | 10.9833 | 1.6  | 3.1280 | 2.7  | 0.2492 | 2.2 | 0.81 | 1434.2 | 28.2  | 1439.6 | 20.9 | 1447.6 | 30.5  | 1447.6 | 30.5  | 99.1  |
| HW1200208-44  | 312 | 62922 | 2.2  | 10.4708 | 0.7  | 3.4768 | 2.3  | 0.2640 | 2.2 | 0.96 | 1510.4 | 29.4  | 1522.0 | 17.9 | 1538.0 | 12.2  | 1538.0 | 12.2  | 98.2  |
| HW1200208-79  | 248 | 6930  | 2.4  | 10.2169 | 2.5  | 2.5896 | 7.5  | 0.1919 | 7.1 | 0.95 | 1131.6 | 73.9  | 1297.7 | 55.2 | 1584.0 | 45.9  | 1584.0 | 45.9  | 71.4  |
| HW1200208-24  | 92  | 16329 | 2.1  | 10.1834 | 10.0 | 3.2204 | 10.2 | 0.2378 | 1.9 | 0.18 | 1375.5 | 23.3  | 1462.1 | 79.0 | 1590.2 | 187.3 | 1590.2 | 187.3 | 86.5  |
| HW1200208-14  | 47  | 12966 | 1.7  | 9.9071  | 4.7  | 4.0547 | 10.9 | 0.2913 | 9.8 | 0.90 | 1648.2 | 142.8 | 1645.2 | 88.8 | 1641.4 | 87.0  | 1641.4 | 87.0  | 100.4 |
| HW1200208-51  | 119 | 34521 | 3.2  | 9.7889  |      |        |      |        |     |      |        |       |        |      |        |       |        |       |       |

|            |     |        |     |         |      |         |      |        |     |      |        |      |        |      |        |       |        |      |             |
|------------|-----|--------|-----|---------|------|---------|------|--------|-----|------|--------|------|--------|------|--------|-------|--------|------|-------------|
| DK0108-65  | 277 | 8001   | 2.3 | 20.7506 | 3.9  | 0.1774  | 3.9  | 0.0267 | 0.2 | 0.05 | 169.8  | 0.4  | 165.8  | 6.0  | 108.7  | 92.4  | 169.8  | 0.4  | NA          |
| DK0108-58  | 777 | 24999  | 1.9 | 19.7641 | 3.0  | 0.1864  | 3.3  | 0.0267 | 1.5 | 0.45 | 170.0  | 2.5  | 173.6  | 5.3  | 222.5  | 68.8  | 170.0  | 2.5  | NA          |
| DK0108-54  | 56  | 1794   | 2.5 | 19.9802 | 6.4  | 0.1849  | 6.6  | 0.0268 | 1.4 | 0.22 | 170.4  | 2.4  | 172.2  | 10.4 | 197.3  | 149.2 | 170.4  | 2.4  | NA          |
| DK0108-89  | 278 | 11052  | 2.1 | 20.6310 | 4.3  | 0.1793  | 4.4  | 0.0268 | 1.2 | 0.27 | 170.7  | 2.0  | 167.5  | 6.8  | 122.3  | 100.2 | 170.7  | 2.0  | NA          |
| DK0108-93  | 562 | 18852  | 2.6 | 20.1559 | 2.5  | 0.1836  | 2.5  | 0.0268 | 0.5 | 0.18 | 170.7  | 0.8  | 171.1  | 4.0  | 176.9  | 58.5  | 170.7  | 0.8  | NA          |
| DK0108-96  | 73  | 9621   | 2.2 | 19.8885 | 4.6  | 0.1893  | 4.8  | 0.0273 | 1.2 | 0.25 | 173.7  | 2.1  | 176.1  | 7.8  | 208.0  | 107.8 | 173.7  | 2.1  | NA          |
| DK0108-29  | 255 | 5808   | 1.9 | 20.8208 | 3.6  | 0.1822  | 3.8  | 0.0275 | 1.0 | 0.25 | 174.9  | 1.6  | 169.9  | 5.9  | 100.7  | 86.2  | 174.9  | 1.6  | NA          |
| DK0108-38  | 78  | 5520   | 1.6 | 20.7507 | 8.6  | 0.1850  | 9.1  | 0.0278 | 3.0 | 0.33 | 177.0  | 5.2  | 172.4  | 14.4 | 108.7  | 202.3 | 177.0  | 5.2  | NA          |
| DK0108-35  | 42  | 10461  | 1.9 | 21.0152 | 14.5 | 0.1845  | 14.5 | 0.0281 | 1.0 | 0.07 | 178.8  | 1.8  | 171.9  | 22.9 | 78.6   | 344.9 | 178.8  | 1.8  | NA          |
| DK0108-67  | 364 | 11340  | 3.3 | 20.6489 | 3.1  | 0.1929  | 4.1  | 0.0289 | 2.6 | 0.63 | 183.6  | 4.6  | 179.1  | 6.7  | 120.3  | 74.1  | 183.6  | 4.6  | NA          |
| DK0108-50  | 299 | 10854  | 2.8 | 20.8576 | 3.0  | 0.1949  | 3.6  | 0.0295 | 2.1 | 0.58 | 187.3  | 3.9  | 180.8  | 6.0  | 96.5   | 69.9  | 187.3  | 3.9  | NA          |
| DK0108-36  | 130 | 5121   | 2.3 | 21.3855 | 6.2  | 0.1968  | 6.3  | 0.0305 | 1.3 | 0.21 | 193.8  | 2.5  | 182.4  | 10.6 | 37.0   | 148.5 | 193.8  | 2.5  | NA          |
| DK0108-51  | 346 | 13110  | 2.1 | 20.0904 | 1.3  | 0.2146  | 2.2  | 0.0313 | 1.8 | 0.81 | 198.5  | 3.5  | 197.4  | 4.0  | 184.5  | 30.1  | 198.5  | 3.5  | NA          |
| DK0108-100 | 167 | 8739   | 1.8 | 20.1286 | 3.7  | 0.2164  | 3.8  | 0.0316 | 0.9 | 0.24 | 200.5  | 1.8  | 198.9  | 6.8  | 180.1  | 85.4  | 200.5  | 1.8  | NA          |
| DK0108-5   | 175 | 5016   | 2.4 | 20.3012 | 2.4  | 0.2182  | 2.8  | 0.0321 | 1.4 | 0.49 | 203.9  | 2.7  | 200.4  | 5.1  | 160.1  | 56.8  | 203.9  | 2.7  | NA          |
| DK0108-34  | 130 | 6480   | 2.8 | 19.9321 | 10.3 | 0.2265  | 10.7 | 0.0327 | 2.8 | 0.26 | 207.7  | 5.7  | 207.3  | 20.0 | 202.9  | 239.4 | 207.7  | 5.7  | NA          |
| DK0108-17  | 260 | 24732  | 5.0 | 18.9531 | 7.2  | 0.2438  | 9.2  | 0.0335 | 5.7 | 0.62 | 212.5  | 11.9 | 221.6  | 18.2 | 318.5  | 163.6 | 212.5  | 11.9 | NA          |
| DK0108-22  | 657 | 20019  | 2.0 | 20.3464 | 1.3  | 0.2309  | 2.6  | 0.0341 | 2.3 | 0.88 | 216.0  | 4.9  | 211.0  | 5.0  | 155.0  | 29.8  | 216.0  | 4.9  | NA          |
| DK0108-70  | 173 | 11082  | 2.6 | 20.6948 | 4.3  | 0.2273  | 4.3  | 0.0341 | 0.4 | 0.09 | 216.2  | 0.9  | 207.9  | 8.1  | 115.0  | 101.0 | 216.2  | 0.9  | NA          |
| DK0108-1   | 91  | 9174   | 3.3 | 19.7031 | 8.7  | 0.2397  | 8.7  | 0.0342 | 0.2 | 0.03 | 217.1  | 0.5  | 218.2  | 17.2 | 229.6  | 202.1 | 217.1  | 0.5  | NA          |
| DK0108-3   | 99  | 9327   | 4.9 | 20.5927 | 9.5  | 0.2301  | 9.6  | 0.0344 | 1.4 | 0.15 | 217.8  | 3.0  | 210.3  | 18.2 | 126.7  | 223.0 | 217.8  | 3.0  | NA          |
| DK0108-98  | 111 | 10872  | 3.0 | 20.2605 | 7.7  | 0.2350  | 7.7  | 0.0345 | 0.4 | 0.06 | 218.8  | 0.9  | 214.3  | 14.9 | 164.8  | 180.4 | 218.8  | 0.9  | NA          |
| DK0108-75  | 169 | 6495   | 2.6 | 19.6307 | 7.7  | 0.2454  | 7.8  | 0.0349 | 0.7 | 0.09 | 221.3  | 1.5  | 222.8  | 15.5 | 238.1  | 178.7 | 221.3  | 1.5  | NA          |
| DK0108-72  | 276 | 9885   | 3.3 | 19.7046 | 3.0  | 0.2454  | 3.1  | 0.0351 | 0.8 | 0.26 | 222.2  | 1.8  | 222.8  | 6.3  | 229.5  | 70.1  | 222.2  | 1.8  | NA          |
| DK0108-40  | 76  | 9804   | 2.8 | 19.9148 | 8.6  | 0.2541  | 8.7  | 0.0367 | 1.0 | 0.12 | 232.4  | 2.4  | 229.9  | 17.9 | 204.9  | 200.9 | 232.4  | 2.4  | NA          |
| DK0108-48  | 67  | 2487   | 1.0 | 19.4627 | 7.9  | 0.3011  | 7.9  | 0.0425 | 0.7 | 0.09 | 268.3  | 1.9  | 267.2  | 18.6 | 258.0  | 181.0 | 268.3  | 1.9  | NA          |
| DK0108-82  | 59  | 13275  | 1.2 | 18.4041 | 3.9  | 0.4881  | 4.2  | 0.0652 | 1.4 | 0.34 | 406.9  | 5.6  | 403.6  | 14.0 | 385.0  | 88.5  | 406.9  | 5.6  | NA          |
| DK0108-23  | 56  | 8031   | 1.2 | 14.7151 | 1.8  | 1.2241  | 2.2  | 0.1306 | 1.3 | 0.57 | 791.5  | 9.4  | 811.6  | 12.3 | 867.3  | 37.4  | 791.5  | 9.4  | 91.3        |
| DK0108-33  | 185 | 32733  | 1.9 | 13.3142 | 0.9  | 1.8635  | 2.2  | 0.1799 | 2.0 | 0.91 | 1066.7 | 19.8 | 1068.2 | 14.6 | 1071.4 | 18.7  | 1071.4 | 18.7 | 99.6        |
| DK0108-88  | 102 | 10299  | 2.1 | 13.1633 | 4.7  | 1.8356  | 5.3  | 0.1752 | 2.5 | 0.47 | 1041.0 | 23.6 | 1058.3 | 34.7 | 1094.3 | 93.5  | 1094.3 | 93.5 | 95.1        |
| DK0108-57  | 191 | 27561  | 2.1 | 12.8495 | 1.4  | 2.0667  | 1.5  | 0.1926 | 0.6 | 0.39 | 1135.4 | 6.0  | 1137.8 | 10.1 | 1142.4 | 26.9  | 1142.4 | 26.9 | 99.4        |
| DK0108-78  | 96  | 22428  | 1.2 | 12.8282 | 1.4  | 2.0247  | 1.4  | 0.1884 | 0.3 | 0.19 | 1112.6 | 2.7  | 1123.8 | 9.4  | 1145.7 | 27.0  | 1145.7 | 27.0 | 97.1        |
| DK0108-15  | 527 | 83541  | 2.4 | 12.4979 | 1.3  | 2.1716  | 2.6  | 0.1968 | 2.2 | 0.86 | 1158.3 | 23.3 | 1172.0 | 17.8 | 1197.3 | 26.0  | 1197.3 | 26.0 | 96.7        |
| DK0108-42  | 65  | 13506  | 1.3 | 12.3821 | 1.1  | 2.2644  | 1.9  | 0.2033 | 1.6 | 0.83 | 1193.3 | 16.9 | 1201.3 | 13.2 | 1215.7 | 20.8  | 1215.7 | 20.8 | 98.2        |
| DK0108-84  | 171 | 17130  | 2.1 | 12.3227 | 1.4  | 2.2584  | 1.5  | 0.2018 | 0.6 | 0.38 | 1185.2 | 6.3  | 1199.4 | 10.7 | 1225.1 | 27.5  | 1225.1 | 27.5 | 96.7        |
| DK0108-41  | 38  | 8085   | 2.3 | 12.0437 | 1.9  | 2.3985  | 2.0  | 0.2095 | 0.7 | 0.33 | 1226.2 | 7.5  | 1242.1 | 14.6 | 1270.0 | 37.6  | 1270.0 | 37.6 | 96.6        |
| DK0108-86  | 256 | 46653  | 2.5 | 11.7703 | 1.3  | 2.5311  | 1.4  | 0.2161 | 0.5 | 0.34 | 1261.1 | 5.4  | 1281.0 | 10.2 | 1314.6 | 25.6  | 1314.6 | 25.6 | 95.9        |
| DK0108-4   | 65  | 16041  | 1.9 | 11.4123 | 3.3  | 2.5445  | 3.6  | 0.2106 | 1.4 | 0.39 | 1232.1 | 15.7 | 1284.9 | 26.2 | 1374.3 | 63.5  | 1374.3 | 63.5 | 89.7        |
| DK0108-85  | 212 | 55176  | 4.4 | 11.0981 | 0.9  | 2.9195  | 2.0  | 0.2350 | 1.8 | 0.90 | 1360.6 | 22.4 | 1387.0 | 15.4 | 1427.8 | 17.0  | 1427.8 | 17.0 | 95.3        |
| DK0108-79  | 573 | 58446  | 2.8 | 9.2410  | 1.0  | 3.3743  | 3.5  | 0.2262 | 3.4 | 0.96 | 1314.3 | 40.0 | 1498.4 | 27.5 | 1769.5 | 18.6  | 1769.5 | 18.6 | 74.3        |
| DK0108-92  | 98  | 37377  | 4.9 | 9.0494  | 2.1  | 4.8325  | 2.4  | 0.3172 | 1.1 | 0.45 | 1775.9 | 16.5 | 1790.6 | 19.9 | 1807.7 | 38.4  | 1807.7 | 38.4 | 98.2        |
| DK0108-46  | 142 | 54864  | 0.5 | 8.8800  | 1.8  | 5.0192  | 1.9  | 0.3233 | 0.8 | 0.40 | 1805.6 | 12.1 | 1822.6 | 16.3 | 1842.0 | 31.9  | 1842.0 | 31.9 | 98.0        |
| DK0108-13  | 191 | 71664  | 2.0 | 8.8527  | 1.0  | 5.0460  | 1.2  | 0.3240 | 0.8 | 0.62 | 1809.2 | 12.0 | 1827.1 | 10.4 | 1847.5 | 17.4  | 1847.5 | 17.4 | 97.9        |
| DK0108-10  | 130 | 26331  | 2.4 | 8.5473  | 1.2  | 5.4456  | 1.6  | 0.3376 | 1.1 | 0.67 | 1875.0 | 17.2 | 1892.1 | 13.5 | 1910.8 | 20.8  | 1910.8 | 20.8 | 98.1        |
| DK0108-56  | 268 | 63303  | 1.7 | 6.5703  | 4.6  | 8.4263  | 5.2  | 0.4015 | 2.5 | 0.48 | 2176.1 | 46.0 | 2278.0 | 47.4 | 2370.8 | 78.2  | 2370.8 | 78.2 | 91.8        |
| DK0108-8   | 677 | 133266 | 2.9 | 6.5082  | 1.8  | 8.0827  | 3.2  | 0.3815 | 2.6 | 0.82 | 2083.4 | 46.6 | 2240.3 | 28.7 | 2387.0 | 30.7  | 2387.0 | 30.7 | 87.3        |
| DK0108-37  | 78  | 44934  | 1.7 | 5.2588  | 1.5  | 13.8730 | 1.8  | 0.5291 | 1.0 | 0.53 | 2737.7 | 21.2 | 2741.1 | 17.1 | 2743.5 | 25.3  | 2743.5 | 25.3 | 99.8        |
| DK0208-27  | 403 | 5532   | 2.5 | 21.1134 | 5.9  | 0.1015  | 6.6  | 0.0155 | 2.8 | 0.42 | 99.4   | 2.7  | 98.1   | 6.1  | 67.6   | 141.6 | 99.4   | 2.7  | NA 0.9, 0.9 |
| DK0208-18  | 178 | 3093   | 3.1 | 22.7145 | 6.9  | 0.1046  | 7.0  | 0.0172 | 0.5 | 0.08 | 110.2  | 0.6  | 101.1  | 6.7  | -109.3 | 171.1 | 110.2  | 0.6  | NA          |
| DK0208-55  | 232 | 6684   | 2.9 | 21.1779 | 6.2  | 0.1634  | 6.5  | 0.0251 | 2.0 | 0.31 | 159.8  | 3.2  | 153.7  | 9.3  | 60.3   | 147.9 | 159.8  | 3.2  | NA          |
| DK0208-39  | 791 | 11451  | 2.7 | 18.3825 | 3.7  | 0.3318  | 5.3  | 0.0442 | 3.7 | 0.70 | 279.0  | 10.1 | 290.9  | 13.3 | 387.6  | 84.0  | 279.0  | 10.1 | NA          |
| DK0208-70  | 282 | 13407  | 1.4 | 18.1580 | 1.7  | 0.5015  | 2.0  | 0.0660 | 1.0 | 0.53 | 412.3  | 4.1  | 412.7  | 6.6  | 415.1  | 37.2  | 412.3  | 4.1  | NA          |
| DK0208-64  | 256 | 20181  | 1.8 | 18.4115 | 10.1 | 0.5102  | 10.1 | 0.0681 | 0.7 | 0.07 | 424.9  | 3.0  | 418.6  | 34.7 | 384.1  | 227.0 | 424.9  | 3.0  | NA          |
| DK0208-69  | 314 | 6072   | 1.8 | 17.7474 | 6.7  | 0.5313  | 6.8  | 0.0684 | 0.7 | 0.10 | 426.4  | 2.8  | 432.6  | 23.8 | 466.0  | 148.9 | 426.4  | 2.8  | NA          |
| DK0208-44  | 151 | 10284  | 1.5 | 17.8060 | 2.1  | 0.5870  | 2.5  | 0.0758 | 1.4 | 0.54 | 471.0  | 6.3  | 468.9  | 9.6  | 458.7  | 47.4  | 471.0  | 6.3  | NA          |
| DK0208-23  | 165 | 19272  | 6.0 | 15.2440 | 3.6  | 0.9216  | 6.2  | 0.1019 | 5.1 | 0.82 | 625.5  | 30.2 | 663.2  | 30.2 | 793.6  | 75.2  | 625.5  | 30.2 | 78.8        |
| DK0208-30  | 62  | 6552   | 1.1 | 14.0270 | 2.8  | 1.6460  | 3.0  | 0.1675 | 1.0 | 0.35 | 998.0  | 9.6  | 988.0  | 18.7 | 965.8  | 56.6  | 965.8  | 56.6 | 103.3       |
| DK0208-62  | 143 | 20895  | 2.5 | 13.9872 | 1.6  | 1.6030  | 1.6  | 0.1626 | 0.3 | 0.16 | 971.3  | 2.3  | 971.4  | 10.0 | 971.5  | 32.3  | 971.5  | 32.3 | 100.0       |
| DK0208-8   | 166 | 22017  | 3.9 | 13.9813 | 1.5  | 1.6134  | 1.5  | 0.1636 | 0.4 | 0.29 | 976.8  | 4.0  | 975.4  | 9.7  | 972.4  | 30.1  | 972.4  | 30.1 | 100.5       |
| DK0208-40  | 92  | 15969  | 2.1 | 13.9657 | 2.3  | 1.6043  | 2.3  | 0.1625 | 0.4 | 0.17 | 970.6  | 3.7  | 971.9  | 14.7 | 974.7  | 47.1  | 974.7  | 47.1 | 99.6        |
| DK0208-1   | 200 | 30105  | 2.2 | 13.9578 | 1.0  | 1.6535  | 1.1  | 0.1674 | 0.5 | 0.47 | 997.7  | 4.8  | 990.9  | 7.0  | 975.8  | 19.8  | 975.8  | 19.8 | 102.2       |
| DK0208-16  | 65  | 3444   | 1.4 | 13.8867 | 2.9  | 1.5874  | 5.8  | 0.1599 | 5.1 | 0.87 | 956.1  | 44.9 | 965.3  | 36.3 | 986.2  | 59.0  | 986.2  | 59.0 | 96.9        |
| DK0208-65  | 126 | 12330  | 2.5 | 13.8786 | 3.6  | 1.6084  | 3.6  | 0.1619 | 0.2 | 0.06 | 967.3  | 2.1  | 973.5  | 22.6 | 987.4  | 73.3  | 987.4  | 73.3 | 98.0        |
| DK0208-41  | 20  | 3537   | 1.3 | 13.7739 | 4.8  | 1.7124  | 4.9  | 0.1711 | 1.0 | 0.21 | 1018.0 | 9.6  | 1013.2 | 31.3 | 1002.8 | 96.8  | 1002.8 | 96.8 | 101.5       |
| DK0208-26  | 385 | 5469   |     |         |      |         |      |        |     |      |        |      |        |      |        |       |        |      |             |



|              |     |        |       |         |      |         |      |        |     |      |        |      |        |      |        |       |        |       |             |
|--------------|-----|--------|-------|---------|------|---------|------|--------|-----|------|--------|------|--------|------|--------|-------|--------|-------|-------------|
| DK0208-66    | 110 | 39618  | 2.0   | 5.5543  | 2.1  | 12.1708 | 2.2  | 0.4903 | 0.8 | 0.35 | 2571.9 | 16.5 | 2617.7 | 20.9 | 2653.2 | 34.7  | 2653.2 | 34.7  | 96.9        |
| DK0208-72    | 134 | 1158   | 1.2   | 4.7158  | 3.7  | 15.2886 | 3.7  | 0.5229 | 0.7 | 0.18 | 2711.5 | 15.1 | 2833.4 | 35.7 | 2921.3 | 59.7  | 2921.3 | 59.7  | 92.8        |
|              |     |        |       |         |      |         |      |        |     |      |        |      |        |      |        |       |        |       |             |
| GBS-01-08-16 | 517 | 2431   | 1.0   | 18.0423 | 6.3  | 0.3713  | 6.5  | 0.0486 | 1.8 | 0.28 | 305.9  | 5.5  | 320.6  | 18.0 | 429.4  | 140.0 | 305.9  | 5.5   | NA 1.8, 1.3 |
| GBS-01-08-12 | 118 | 20180  | 1.6   | 18.8631 | 10.9 | 0.4575  | 11.4 | 0.0626 | 3.2 | 0.29 | 391.3  | 12.3 | 382.5  | 36.3 | 329.4  | 247.9 | 391.3  | 12.3  | NA          |
| GBS-01-08-37 | 742 | 96126  | 4.1   | 18.2887 | 2.1  | 0.4817  | 2.3  | 0.0639 | 1.1 | 0.46 | 399.2  | 4.2  | 399.2  | 7.7  | 399.1  | 46.6  | 399.2  | 4.2   | NA          |
| GBS-01-08-7  | 129 | 15261  | 0.7   | 16.9395 | 7.0  | 0.7870  | 7.3  | 0.0967 | 2.0 | 0.27 | 595.0  | 11.1 | 589.5  | 32.6 | 568.4  | 153.0 | 595.0  | 11.1  | 104.7       |
| GBS-01-08-21 | 101 | 10269  | 1.5   | 16.0775 | 8.6  | 0.9078  | 9.1  | 0.1059 | 2.9 | 0.32 | 648.6  | 17.8 | 655.9  | 43.8 | 680.9  | 183.8 | 648.6  | 17.8  | 95.3        |
| GBS-01-08-74 | 310 | 69150  | 3.7   | 14.2911 | 1.5  | 1.4844  | 2.2  | 0.1539 | 1.6 | 0.75 | 922.5  | 14.1 | 924.0  | 13.3 | 927.6  | 30.0  | 927.6  | 30.0  | 99.5        |
| GBS-01-08-40 | 117 | 40635  | 2.7   | 14.2003 | 5.5  | 1.4881  | 5.8  | 0.1533 | 1.7 | 0.29 | 919.2  | 14.5 | 925.6  | 35.2 | 940.7  | 113.5 | 940.7  | 113.5 | 97.7        |
| GBS-01-08-43 | 222 | 30003  | 2.6   | 14.0590 | 1.7  | 1.4530  | 2.1  | 0.1482 | 1.3 | 0.61 | 890.6  | 10.9 | 911.1  | 12.9 | 961.1  | 34.5  | 961.1  | 34.5  | 92.7        |
| GBS-01-08-98 | 68  | 20011  | 3.3   | 14.0257 | 7.3  | 1.5435  | 7.4  | 0.1570 | 1.4 | 0.18 | 940.1  | 11.9 | 947.9  | 45.6 | 966.0  | 148.4 | 966.0  | 148.4 | 97.3        |
| GBS-01-08-41 | 284 | 47436  | 3.0   | 14.0025 | 1.5  | 1.4675  | 1.8  | 0.1490 | 1.1 | 0.60 | 895.6  | 9.1  | 917.1  | 11.0 | 969.4  | 29.9  | 969.4  | 29.9  | 92.4        |
| GBS-01-08-28 | 253 | 46141  | 4.9   | 13.9078 | 1.9  | 1.6236  | 2.2  | 0.1638 | 1.1 | 0.51 | 977.7  | 10.2 | 979.4  | 13.9 | 983.2  | 38.6  | 983.2  | 38.6  | 99.4        |
| GBS-01-08-32 | 79  | 12809  | 1.9   | 13.8468 | 4.7  | 1.6361  | 5.7  | 0.1643 | 3.2 | 0.56 | 980.7  | 28.8 | 984.2  | 35.7 | 992.1  | 95.5  | 992.1  | 95.5  | 98.8        |
| GBS-01-08-24 | 237 | 28552  | 6.1   | 13.8131 | 1.0  | 1.6872  | 1.2  | 0.1690 | 0.7 | 0.58 | 1006.8 | 6.6  | 1003.7 | 7.9  | 997.0  | 20.5  | 997.0  | 20.5  | 101.0       |
| GBS-01-08-29 | 161 | 56087  | 2.0   | 13.8110 | 1.8  | 1.7063  | 3.2  | 0.1709 | 2.7 | 0.83 | 1017.2 | 25.3 | 1010.9 | 20.6 | 997.4  | 36.0  | 997.4  | 36.0  | 102.0       |
| GBS-01-08-51 | 177 | 26683  | 3.3   | 13.7737 | 1.9  | 1.6162  | 2.2  | 0.1614 | 1.2 | 0.53 | 964.8  | 10.7 | 976.5  | 14.0 | 1002.8 | 38.3  | 1002.8 | 38.3  | 96.2        |
| GBS-01-08-79 | 119 | 23148  | 1.9   | 13.7356 | 2.6  | 1.6988  | 4.2  | 0.1692 | 3.2 | 0.78 | 1007.9 | 30.1 | 1008.1 | 26.6 | 1008.5 | 53.1  | 1008.5 | 53.1  | 99.9        |
| GBS-01-08-10 | 280 | 38381  | 2.3   | 13.7119 | 1.5  | 1.6614  | 2.5  | 0.1652 | 2.0 | 0.80 | 985.8  | 18.0 | 993.9  | 15.6 | 1012.0 | 29.6  | 1012.0 | 29.6  | 97.4        |
| GBS-01-08-45 | 50  | 7894   | 2.3   | 13.7044 | 7.0  | 1.7269  | 7.4  | 0.1716 | 2.4 | 0.33 | 1021.1 | 22.8 | 1018.6 | 47.4 | 1013.1 | 141.1 | 1013.1 | 141.1 | 100.8       |
| GBS-01-08-65 | 227 | 38940  | 2.3   | 13.6800 | 1.9  | 1.7111  | 2.1  | 0.1698 | 0.9 | 0.43 | 1010.9 | 8.5  | 1012.7 | 13.6 | 1016.7 | 38.7  | 1016.7 | 38.7  | 99.4        |
| GBS-01-08-9  | 304 | 46709  | 2.7   | 13.6688 | 1.3  | 1.6989  | 2.0  | 0.1684 | 1.5 | 0.73 | 1003.4 | 13.5 | 1008.1 | 12.6 | 1018.4 | 27.2  | 1018.4 | 27.2  | 98.5        |
| GBS-01-08-26 | 101 | 23871  | 1.8   | 13.6095 | 3.8  | 1.7139  | 4.2  | 0.1692 | 1.6 | 0.39 | 1007.5 | 15.1 | 1013.8 | 26.7 | 1027.2 | 77.6  | 1027.2 | 77.6  | 98.1        |
| GBS-01-08-61 | 113 | 19520  | 1.5   | 13.6052 | 4.2  | 1.7646  | 5.0  | 0.1741 | 2.8 | 0.55 | 1034.8 | 26.6 | 1032.6 | 32.7 | 1027.8 | 85.1  | 1027.8 | 85.1  | 100.7       |
| GBS-01-08-6  | 607 | 80320  | 1.5   | 13.5786 | 0.9  | 1.7105  | 2.0  | 0.1685 | 1.8 | 0.90 | 1003.6 | 16.9 | 1012.5 | 12.9 | 1031.7 | 17.4  | 1031.7 | 17.4  | 97.3        |
| GBS-01-08-54 | 326 | 73725  | 4.8   | 13.5652 | 1.2  | 1.6578  | 2.8  | 0.1631 | 2.6 | 0.90 | 974.0  | 23.3 | 992.5  | 18.0 | 1033.7 | 24.7  | 1033.7 | 24.7  | 94.2        |
| GBS-01-08-60 | 194 | 43442  | 2.1   | 13.5652 | 1.9  | 1.7316  | 2.6  | 0.1704 | 1.7 | 0.66 | 1014.1 | 16.1 | 1020.3 | 16.7 | 1033.7 | 39.3  | 1033.7 | 39.3  | 98.1        |
| GBS-01-08-72 | 365 | 71515  | 1.8   | 13.5515 | 1.5  | 1.7146  | 2.9  | 0.1685 | 2.5 | 0.86 | 1004.0 | 23.2 | 1014.0 | 18.7 | 1035.8 | 30.4  | 1035.8 | 30.4  | 96.9        |
| GBS-01-08-92 | 418 | 64095  | 1.5   | 13.5505 | 0.9  | 1.7167  | 1.3  | 0.1687 | 0.9 | 0.71 | 1005.0 | 8.7  | 1014.8 | 8.4  | 1035.9 | 18.7  | 1035.9 | 18.7  | 97.0        |
| GBS-01-08-71 | 53  | 14141  | 1.8   | 13.5157 | 8.9  | 1.7362  | 9.8  | 0.1702 | 4.1 | 0.42 | 1013.1 | 38.8 | 1022.0 | 63.5 | 1041.1 | 180.5 | 1041.1 | 180.5 | 97.3        |
| GBS-01-08-75 | 158 | 21587  | 0.9   | 13.4961 | 3.7  | 1.8218  | 4.3  | 0.1783 | 2.1 | 0.50 | 1057.8 | 20.9 | 1053.3 | 28.0 | 1044.1 | 74.5  | 1044.1 | 74.5  | 101.3       |
| GBS-01-08-83 | 106 | 19394  | 1.9   | 13.4896 | 3.9  | 1.8288  | 6.2  | 0.1789 | 4.9 | 0.79 | 1061.1 | 48.0 | 1055.9 | 41.0 | 1045.1 | 77.9  | 1045.1 | 77.9  | 101.5       |
| GBS-01-08-53 | 137 | 31115  | 2.7   | 13.4890 | 3.0  | 1.7250  | 3.4  | 0.1688 | 1.5 | 0.45 | 1005.3 | 14.4 | 1017.9 | 21.9 | 1045.1 | 61.4  | 1045.1 | 61.4  | 96.2        |
| GBS-01-08-22 | 446 | 59914  | 2.7   | 13.4872 | 1.2  | 1.6239  | 3.0  | 0.1588 | 2.8 | 0.92 | 950.4  | 24.5 | 979.5  | 19.0 | 1045.4 | 24.5  | 1045.4 | 24.5  | 90.9        |
| GBS-01-08-49 | 224 | 59516  | 1.2   | 13.4798 | 1.8  | 1.6760  | 3.0  | 0.1639 | 2.4 | 0.80 | 978.2  | 21.7 | 999.5  | 19.1 | 1046.5 | 36.3  | 1046.5 | 36.3  | 93.5        |
| GBS-01-08-44 | 132 | 47428  | 1.8   | 13.4764 | 1.6  | 1.6475  | 2.4  | 0.1610 | 1.7 | 0.74 | 962.5  | 15.6 | 988.6  | 14.9 | 1047.0 | 31.9  | 1047.0 | 31.9  | 91.9        |
| GBS-01-08-3  | 245 | 115059 | 6.4   | 13.4758 | 1.5  | 1.8586  | 2.1  | 0.1817 | 1.5 | 0.71 | 1076.0 | 15.0 | 1066.5 | 14.0 | 1047.1 | 30.1  | 1047.1 | 30.1  | 102.8       |
| GBS-01-08-94 | 169 | 24234  | 2.1   | 13.4722 | 2.0  | 1.7702  | 4.1  | 0.1730 | 3.6 | 0.88 | 1028.4 | 34.5 | 1034.6 | 26.9 | 1047.7 | 40.4  | 1047.7 | 40.4  | 98.2        |
| GBS-01-08-45 | 138 | 22903  | 3.5   | 13.4696 | 2.6  | 1.6855  | 3.3  | 0.1647 | 1.9 | 0.59 | 982.6  | 17.5 | 1003.1 | 20.9 | 1048.0 | 53.4  | 1048.0 | 53.4  | 93.8        |
| GBS-01-08-66 | 344 | 71969  | 3.4   | 13.4652 | 1.4  | 1.8575  | 3.1  | 0.1814 | 2.7 | 0.88 | 1074.6 | 26.6 | 1066.1 | 20.1 | 1048.7 | 29.0  | 1048.7 | 29.0  | 102.5       |
| GBS-01-08-64 | 141 | 18593  | 2.2   | 13.4347 | 3.1  | 1.7211  | 3.4  | 0.1677 | 1.2 | 0.35 | 999.4  | 10.8 | 1016.4 | 21.5 | 1053.3 | 63.4  | 1053.3 | 63.4  | 94.9        |
| GBS-01-08-4  | 270 | 41123  | 4.8   | 13.4163 | 1.3  | 1.7775  | 1.7  | 0.1730 | 1.1 | 0.64 | 1028.4 | 10.3 | 1037.3 | 11.0 | 1056.0 | 26.4  | 1056.0 | 26.4  | 97.4        |
| GBS-01-08-52 | 50  | 9339   | 1.0   | 13.3899 | 7.5  | 1.7396  | 8.6  | 0.1689 | 4.2 | 0.48 | 1006.2 | 38.7 | 1023.3 | 55.4 | 1060.0 | 151.3 | 1060.0 | 151.3 | 94.9        |
| GBS-01-08-69 | 440 | 81952  | 2.3   | 13.3827 | 0.9  | 1.8940  | 1.3  | 0.1838 | 0.9 | 0.71 | 1087.9 | 9.4  | 1079.0 | 8.8  | 1061.1 | 18.9  | 1061.1 | 18.9  | 102.5       |
| GBS-01-08-34 | 198 | 56081  | 2.8   | 13.3811 | 2.2  | 1.7977  | 3.0  | 0.1745 | 2.0 | 0.68 | 1036.7 | 19.4 | 1044.6 | 19.5 | 1061.3 | 44.2  | 1061.3 | 44.2  | 97.7        |
| GBS-01-08-39 | 178 | 145695 | 233.3 | 13.2801 | 2.7  | 1.8933  | 4.5  | 0.1824 | 3.6 | 0.80 | 1079.8 | 36.0 | 1078.7 | 30.0 | 1076.6 | 54.3  | 1076.6 | 54.3  | 100.3       |
| GBS-01-08-42 | 250 | 173494 | 3.6   | 13.1889 | 0.9  | 1.8328  | 2.0  | 0.1753 | 1.8 | 0.90 | 1041.3 | 17.6 | 1057.3 | 13.3 | 1090.3 | 17.4  | 1090.3 | 17.4  | 95.5        |
| GBS-01-08-62 | 27  | 4240   | 3.1   | 13.0878 | 9.8  | 1.7509  | 12.7 | 0.1662 | 8.1 | 0.64 | 991.1  | 74.5 | 1027.5 | 82.3 | 1105.7 | 196.0 | 1105.7 | 196.0 | 89.6        |
| GBS-01-08-70 | 81  | 15328  | 1.8   | 12.9713 | 3.6  | 1.9753  | 5.0  | 0.1858 | 3.5 | 0.70 | 1098.7 | 35.6 | 1107.1 | 34.0 | 1123.6 | 72.0  | 1123.6 | 72.0  | 97.8        |
| GBS-01-08-2  | 204 | 49206  | 2.3   | 12.9341 | 2.0  | 1.7821  | 6.1  | 0.1672 | 5.8 | 0.95 | 996.5  | 53.4 | 1039.0 | 39.8 | 1129.3 | 39.1  | 1129.3 | 39.1  | 88.2        |
| GBS-01-08-96 | 249 | 39992  | 2.7   | 12.9081 | 1.7  | 2.0333  | 2.5  | 0.1904 | 1.9 | 0.74 | 1123.3 | 19.2 | 1126.7 | 17.2 | 1133.4 | 34.0  | 1133.4 | 34.0  | 99.1        |
| GBS-01-08-56 | 109 | 16147  | 2.4   | 12.8448 | 3.5  | 2.1354  | 5.2  | 0.1989 | 3.9 | 0.75 | 1169.6 | 41.6 | 1160.3 | 36.0 | 1143.1 | 68.6  | 1143.1 | 68.6  | 102.3       |
| GBS-01-08-87 | 252 | 101053 | 4.0   | 12.8192 | 1.4  | 1.8965  | 2.7  | 0.1763 | 2.4 | 0.86 | 1046.9 | 22.8 | 1079.9 | 18.2 | 1147.1 | 27.3  | 1147.1 | 27.3  | 91.3        |
| GBS-01-08-91 | 797 | 258032 | 4.6   | 12.7986 | 0.5  | 1.9035  | 2.8  | 0.1767 | 2.7 | 0.98 | 1048.9 | 26.2 | 1082.3 | 18.3 | 1150.2 | 9.7   | 1150.2 | 9.7   | 91.2        |
| GBS-01-08-99 | 75  | 16437  | 1.8   | 12.7874 | 3.7  | 1.7526  | 5.0  | 0.1625 | 3.5 | 0.69 | 970.9  | 31.4 | 1028.1 | 32.7 | 1152.0 | 72.6  | 1152.0 | 72.6  | 84.3        |
| GBS-01-08-50 | 108 | 19118  | 1.5   | 12.7333 | 3.7  | 2.0331  | 4.5  | 0.1878 | 2.6 | 0.57 | 1109.2 | 26.3 | 1126.6 | 30.6 | 1160.4 | 73.0  | 1160.4 | 73.0  | 95.6        |
| GBS-01-08-63 | 51  | 10683  | 0.8   | 12.7178 | 5.7  | 1.9258  | 6.8  | 0.1776 | 3.7 | 0.54 | 1054.0 | 35.6 | 1090.1 | 45.4 | 1162.8 | 113.5 | 1162.8 | 113.5 | 90.6        |
| GBS-01-08-95 | 391 | 72456  | 3.3   | 12.6939 | 0.8  | 2.0036  | 1.3  | 0.1845 | 1.1 | 0.82 | 1091.3 | 10.8 | 1116.7 | 8.9  | 1166.5 | 15.0  | 1166.5 | 15.0  | 93.6        |
| GBS-01-08-13 | 280 | 46958  | 4.9   | 12.6900 | 1.1  | 2.1826  | 2.5  | 0.2009 | 2.2 | 0.90 | 1180.0 | 23.8 | 1175.5 | 17.1 | 1167.1 | 21.4  | 1167.1 | 21.4  | 101.1       |
| GBS-01-08-38 | 696 | 199224 | 4.2   | 12.6637 | 0.4  | 2.2216  | 1.4  | 0.2040 | 1.4 | 0.96 | 1197.0 | 15.2 | 1187.9 | 10.1 | 1171.3 | 7.7   | 1171.3 | 7.7   | 102.2       |
| GBS-01-08-82 | 644 | 150891 | 3.9   | 12.6325 | 0.3  | 2.1144  | 3.0  | 0.1937 | 3.0 | 0.99 | 1141.5 | 30.9 | 1153.5 | 20.5 | 1176.2 | 6.6   | 1176.2 | 6.6   | 97.1        |
| GBS-01-08-93 | 558 |        |       |         |      |         |      |        |     |      |        |      |        |      |        |       |        |       |             |

|               |      |        |     |         |      |        |      |        |     |      |        |      |        |      |        |        |        |      |             |
|---------------|------|--------|-----|---------|------|--------|------|--------|-----|------|--------|------|--------|------|--------|--------|--------|------|-------------|
| GE0110 - 28   | 816  | 27388  | 2.1 | 20.1703 | 6.4  | 0.1079 | 7.1  | 0.0158 | 3.1 | 0.44 | 100.9  | 3.1  | 104.0  | 7.0  | 175.2  | 149.1  | 100.9  | 3.1  | NA          |
| GE0110 - 62   | 916  | 24386  | 2.1 | 21.1073 | 3.8  | 0.1031 | 4.2  | 0.0158 | 1.9 | 0.44 | 100.9  | 1.9  | 99.6   | 4.0  | 68.3   | 89.8   | 100.9  | 1.9  | NA          |
| GE0110 - 47   | 1121 | 25535  | 1.9 | 21.1560 | 4.9  | 0.1029 | 5.5  | 0.0158 | 2.6 | 0.47 | 101.0  | 2.6  | 99.5   | 5.2  | 62.8   | 115.9  | 101.0  | 2.6  | NA          |
| GE0110 - 95   | 371  | 10845  | 2.1 | 20.1724 | 13.9 | 0.1079 | 14.2 | 0.0158 | 2.8 | 0.19 | 101.0  | 2.8  | 104.1  | 14.0 | 175.0  | 325.9  | 101.0  | 2.8  | NA          |
| GE0110 - 102  | 915  | 61430  | 2.9 | 20.6905 | 3.8  | 0.1053 | 5.1  | 0.0158 | 3.4 | 0.66 | 101.0  | 3.4  | 101.6  | 4.9  | 115.5  | 89.4   | 101.0  | 3.4  | NA          |
| GE0110 - 100  | 963  | 72608  | 2.8 | 20.4009 | 5.9  | 0.1069 | 6.7  | 0.0158 | 3.1 | 0.47 | 101.2  | 3.1  | 103.2  | 6.5  | 148.7  | 138.3  | 101.2  | 3.1  | NA          |
| GE0110 - 10   | 658  | 17355  | 1.7 | 19.4837 | 5.5  | 0.1122 | 6.0  | 0.0159 | 2.5 | 0.42 | 101.4  | 2.5  | 108.0  | 6.1  | 255.5  | 125.5  | 101.4  | 2.5  | NA          |
| GE0110 - 11   | 715  | 34795  | 3.1 | 20.9017 | 7.0  | 0.1047 | 7.2  | 0.0159 | 1.7 | 0.24 | 101.5  | 1.7  | 101.1  | 6.9  | 91.5   | 165.6  | 101.5  | 1.7  | NA          |
| GE0110 - 75   | 604  | 19074  | 1.3 | 21.4918 | 5.9  | 0.1020 | 6.8  | 0.0159 | 3.4 | 0.50 | 101.7  | 3.4  | 98.6   | 6.4  | 25.1   | 140.8  | 101.7  | 3.4  | NA          |
| GE0110 - 14   | 957  | 27360  | 2.5 | 19.9246 | 5.0  | 0.1101 | 5.5  | 0.0159 | 2.3 | 0.41 | 101.7  | 2.3  | 106.0  | 5.6  | 203.7  | 116.7  | 101.7  | 2.3  | NA          |
| GE0110 - 104  | 373  | 20004  | 2.7 | 22.4058 | 17.9 | 0.0980 | 18.3 | 0.0159 | 3.8 | 0.21 | 101.9  | 3.9  | 95.0   | 16.6 | -75.7  | 441.4  | 101.9  | 3.9  | NA          |
| GE0110 - 93   | 348  | 14032  | 2.4 | 22.3736 | 12.2 | 0.0982 | 12.7 | 0.0159 | 3.3 | 0.26 | 101.9  | 3.3  | 95.1   | 11.5 | -72.2  | 299.6  | 101.9  | 3.3  | NA          |
| GE0110 - 83   | 217  | 7287   | 2.6 | 21.3158 | 14.3 | 0.1032 | 15.1 | 0.0160 | 4.9 | 0.32 | 102.0  | 5.0  | 99.7   | 14.4 | 44.8   | 343.2  | 102.0  | 5.0  | NA          |
| GE0110 - 53   | 163  | 7980   | 1.6 | 20.2325 | 27.3 | 0.1087 | 28.2 | 0.0160 | 6.8 | 0.24 | 102.0  | 6.8  | 104.8  | 28.1 | 168.0  | 649.4  | 102.0  | 6.8  | NA          |
| GE0110 - 30   | 2008 | 5930   | 6.5 | 20.0860 | 4.2  | 0.1100 | 4.7  | 0.0160 | 2.2 | 0.47 | 102.5  | 2.3  | 105.9  | 4.8  | 185.0  | 97.6   | 102.5  | 2.3  | NA          |
| GE0110 - 29   | 697  | 6406   | 2.7 | 20.0426 | 11.5 | 0.1106 | 12.7 | 0.0161 | 5.4 | 0.43 | 102.8  | 5.5  | 106.5  | 12.8 | 190.1  | 267.3  | 102.8  | 5.5  | NA          |
| GE0110 - 80   | 352  | 11323  | 1.5 | 22.1765 | 13.0 | 0.1002 | 13.6 | 0.0161 | 4.0 | 0.30 | 103.1  | 4.1  | 97.0   | 12.6 | -50.6  | 316.9  | 103.1  | 4.1  | NA          |
| GE0110 - 26   | 898  | 59684  | 3.9 | 20.4034 | 2.3  | 0.1090 | 3.7  | 0.0161 | 2.9 | 0.78 | 103.2  | 3.0  | 105.1  | 3.7  | 148.4  | 55.0   | 103.2  | 3.0  | NA          |
| GE0110 - 57   | 420  | 17199  | 2.2 | 21.9500 | 15.5 | 0.1013 | 16.1 | 0.0161 | 4.3 | 0.27 | 103.2  | 4.4  | 98.0   | 15.1 | -25.7  | 378.2  | 103.2  | 4.4  | NA          |
| GE0110 - 68   | 450  | 11561  | 1.9 | 24.3208 | 14.1 | 0.0915 | 14.4 | 0.0161 | 2.6 | 0.18 | 103.2  | 2.7  | 88.9   | 12.2 | -280.3 | 361.6  | 103.2  | 2.7  | NA          |
| GE0110 - 84   | 434  | 20329  | 4.3 | 22.6198 | 7.4  | 0.0986 | 7.6  | 0.0162 | 1.8 | 0.24 | 103.4  | 1.8  | 95.4   | 7.0  | -99.0  | 182.4  | 103.4  | 1.8  | NA          |
| GE0110 - 70   | 1110 | 51351  | 3.2 | 20.3087 | 3.7  | 0.1100 | 4.4  | 0.0162 | 2.4 | 0.54 | 103.6  | 2.4  | 105.9  | 4.4  | 159.3  | 86.7   | 103.6  | 2.4  | NA          |
| GE0110 - 87   | 900  | 19558  | 3.6 | 20.4992 | 9.9  | 0.1091 | 10.2 | 0.0162 | 2.6 | 0.25 | 103.7  | 2.7  | 105.2  | 10.2 | 137.4  | 232.3  | 103.7  | 2.7  | NA          |
| GE0110 - 60   | 539  | 19766  | 1.8 | 20.3027 | 8.3  | 0.1107 | 8.4  | 0.0163 | 1.6 | 0.19 | 104.2  | 1.7  | 106.6  | 8.5  | 160.0  | 194.0  | 104.2  | 1.7  | NA          |
| GE0110 - 52   | 1228 | 4287   | 1.9 | 17.9840 | 9.1  | 0.1253 | 9.4  | 0.0163 | 2.2 | 0.23 | 104.5  | 2.3  | 119.9  | 10.6 | 436.6  | 203.5  | 104.5  | 2.3  | NA          |
| GE0110 - 90   | 783  | 2899   | 2.0 | 20.3097 | 5.6  | 0.1111 | 6.5  | 0.0164 | 3.4 | 0.52 | 104.6  | 3.5  | 107.0  | 6.6  | 159.2  | 130.6  | 104.6  | 3.5  | NA          |
| GE0110 - 19   | 422  | 16971  | 1.8 | 20.5539 | 8.6  | 0.1100 | 9.5  | 0.0164 | 4.0 | 0.42 | 104.9  | 4.2  | 106.0  | 9.6  | 131.1  | 203.3  | 104.9  | 4.2  | NA          |
| GE0110 - 96   | 621  | 12228  | 2.0 | 19.6044 | 7.4  | 0.1165 | 7.8  | 0.0166 | 2.6 | 0.34 | 105.9  | 2.8  | 111.9  | 8.3  | 241.2  | 170.2  | 105.9  | 2.8  | NA          |
| GE0110 - 101  | 784  | 36493  | 1.0 | 20.8607 | 7.0  | 0.1115 | 7.3  | 0.0169 | 2.2 | 0.30 | 107.8  | 2.4  | 107.3  | 7.5  | 96.2   | 165.5  | 107.8  | 2.4  | NA          |
| GE0110 - 51   | 184  | 6146   | 1.0 | 20.3320 | 30.9 | 0.1148 | 31.4 | 0.0169 | 5.6 | 0.18 | 108.2  | 6.0  | 110.3  | 32.9 | 156.6  | 739.3  | 108.2  | 6.0  | NA          |
| GE0110 - 67   | 685  | 36614  | 2.6 | 21.7176 | 3.3  | 0.1079 | 5.6  | 0.0170 | 4.5 | 0.81 | 108.7  | 4.9  | 104.1  | 5.5  | 0.0    | 78.6   | 108.7  | 4.9  | NA          |
| GE0110 - 66   | 506  | 13853  | 2.3 | 20.9225 | 7.6  | 0.1130 | 8.1  | 0.0171 | 2.8 | 0.35 | 109.6  | 3.1  | 108.7  | 8.4  | 89.2   | 181.0  | 109.6  | 3.1  | NA          |
| GE0110 - 69   | 2130 | 5560   | 3.9 | 20.1011 | 3.8  | 0.1195 | 4.8  | 0.0174 | 3.0 | 0.62 | 111.3  | 3.3  | 114.6  | 5.2  | 183.2  | 88.6   | 111.3  | 3.3  | NA          |
| GE0110 - 56   | 651  | 44087  | 1.5 | 20.9040 | 4.0  | 0.1922 | 9.3  | 0.0291 | 8.4 | 0.90 | 185.1  | 15.3 | 178.5  | 15.3 | 91.2   | 95.5   | 185.1  | 15.3 | NA          |
| GE0110 - 58   | 770  | 3638   | 1.3 | 18.0725 | 2.1  | 0.4691 | 4.4  | 0.0615 | 3.9 | 0.88 | 384.7  | 14.5 | 390.6  | 14.4 | 425.7  | 47.5   | 384.7  | 14.5 | NA          |
| GE0110 - 73   | 654  | 267622 | 2.1 | 12.8550 | 0.5  | 2.0260 | 4.5  | 0.1889 | 4.5 | 0.99 | 1115.4 | 45.9 | 1124.3 | 30.6 | 1141.5 | 9.0    | 1141.5 | 9.0  | 97.7        |
| GE0110 - 6    | 103  | 47157  | 2.8 | 12.7472 | 1.6  | 2.1624 | 2.6  | 0.1999 | 2.0 | 0.78 | 1174.9 | 21.4 | 1169.0 | 17.9 | 1158.2 | 32.2   | 1158.2 | 32.2 | 101.4       |
| GE0110 - 97   | 780  | 7623   | 1.4 | 11.5534 | 1.7  | 0.8821 | 4.6  | 0.0739 | 4.3 | 0.93 | 459.7  | 18.9 | 642.1  | 21.8 | 1350.6 | 32.0   | 1350.6 | 32.0 | NA          |
| GE0110 - 34   | 556  | 6682   | 1.5 | 9.6858  | 0.7  | 3.7973 | 1.7  | 0.2668 | 1.5 | 0.92 | 1524.3 | 20.9 | 1592.2 | 13.5 | 1683.2 | 12.4   | 1683.2 | 12.4 | 90.6        |
| GE0110 - 86   | 337  | 100431 | 2.3 | 9.5748  | 0.3  | 3.1019 | 2.7  | 0.2154 | 2.7 | 1.00 | 1257.6 | 31.2 | 1433.2 | 21.1 | 1704.5 | 4.8    | 1704.5 | 4.8  | 73.8        |
| GE0110 - 82   | 116  | 55667  | 2.5 | 9.5185  | 1.6  | 4.2711 | 2.6  | 0.2949 | 2.0 | 0.77 | 1665.7 | 28.9 | 1687.8 | 21.0 | 1715.3 | 29.9   | 1715.3 | 29.9 | 97.1        |
| GE0110 - 92   | 280  | 157426 | 0.8 | 9.2341  | 0.6  | 4.7181 | 2.2  | 0.3160 | 2.1 | 0.97 | 1770.1 | 32.8 | 1770.5 | 18.4 | 1770.9 | 10.1   | 1770.9 | 10.1 | 100.0       |
| GE0110 - 49   | 367  | 327304 | 1.4 | 9.2004  | 0.6  | 4.9554 | 3.4  | 0.3307 | 3.4 | 0.99 | 1841.6 | 54.3 | 1811.7 | 29.0 | 1777.6 | 10.4   | 1777.6 | 10.4 | 103.6       |
| GE0110 - 65   | 165  | 113015 | 2.0 | 9.1965  | 0.5  | 4.8636 | 2.7  | 0.3244 | 2.7 | 0.98 | 1811.2 | 42.4 | 1796.0 | 23.1 | 1778.3 | 9.8    | 1778.3 | 9.8  | 101.8       |
| GE0110 - 17   | 112  | 84074  | 1.4 | 9.1906  | 1.0  | 4.7242 | 2.2  | 0.3149 | 2.0 | 0.89 | 1764.8 | 30.2 | 1771.5 | 18.5 | 1779.5 | 18.6   | 1779.5 | 18.6 | 99.2        |
| GE0110 - 59   | 403  | 334091 | 2.0 | 9.1786  | 0.4  | 4.9469 | 3.5  | 0.3293 | 3.5 | 0.99 | 1835.1 | 55.2 | 1810.3 | 29.4 | 1781.9 | 6.9    | 1781.9 | 6.9  | 103.0       |
| GE0110 - 94   | 198  | 83306  | 1.7 | 9.1559  | 0.9  | 4.6806 | 1.7  | 0.3108 | 1.4 | 0.84 | 1744.7 | 22.0 | 1763.8 | 14.3 | 1786.4 | 16.7   | 1786.4 | 16.7 | 97.7        |
| GE0110 - 88   | 292  | 247798 | 1.4 | 9.1548  | 0.5  | 4.8116 | 3.0  | 0.3195 | 2.9 | 0.98 | 1787.2 | 45.3 | 1786.9 | 24.8 | 1786.6 | 9.9    | 1786.6 | 9.9  | 100.0       |
| GE0110 - 35   | 207  | 209429 | 1.0 | 9.1399  | 0.5  | 4.8369 | 2.5  | 0.3206 | 2.5 | 0.98 | 1792.8 | 38.6 | 1791.3 | 21.2 | 1789.6 | 8.7    | 1789.6 | 8.7  | 100.2       |
| GE0110 - 46   | 473  | 41522  | 3.0 | 9.1349  | 0.7  | 4.9639 | 5.8  | 0.3289 | 5.8 | 0.99 | 1832.9 | 92.5 | 1813.2 | 49.4 | 1790.6 | 12.8   | 1790.6 | 12.8 | 102.4       |
| GE0110 - 24   | 112  | 165445 | 0.6 | 9.1307  | 0.8  | 4.7320 | 2.2  | 0.3134 | 2.1 | 0.94 | 1757.2 | 32.2 | 1772.9 | 18.7 | 1791.4 | 13.7   | 1791.4 | 13.7 | 98.1        |
| GE0110 - 21   | 509  | 13587  | 1.7 | 9.0429  | 0.3  | 3.8104 | 6.3  | 0.2499 | 6.3 | 1.00 | 1438.0 | 81.0 | 1594.9 | 50.6 | 1809.0 | 5.9    | 1809.0 | 5.9  | 79.5        |
| GE0110 - 31   | 159  | 66699  | 7.5 | 8.8913  | 0.5  | 5.1280 | 1.7  | 0.3307 | 1.6 | 0.96 | 1841.7 | 25.8 | 1840.8 | 14.2 | 1839.7 | 8.2    | 1839.7 | 8.2  | 100.1       |
| GE0110 - 74   | 218  | 186354 | 1.8 | 8.8708  | 0.4  | 5.2305 | 1.7  | 0.3365 | 1.7 | 0.97 | 1869.9 | 26.9 | 1857.6 | 14.6 | 1843.9 | 7.8    | 1843.9 | 7.8  | 101.4       |
| GE0110 - 44   | 50   | 13732  | 0.6 | 8.4259  | 1.3  | 5.6915 | 3.5  | 0.3478 | 3.2 | 0.92 | 1924.1 | 53.9 | 1930.1 | 30.3 | 1936.5 | 24.0   | 1936.5 | 24.0 | 99.4        |
| GE0110 - 63   | 198  | 293696 | 2.0 | 6.7357  | 0.4  | 8.8909 | 1.7  | 0.4343 | 1.7 | 0.98 | 2325.2 | 32.8 | 2326.9 | 15.7 | 2328.3 | 6.4    | 2328.3 | 6.4  | 99.9        |
| GE0110 - 25   | 487  | 265536 | 0.9 | 6.4722  | 0.3  | 9.0136 | 1.6  | 0.4231 | 1.5 | 0.98 | 2274.6 | 29.5 | 2339.4 | 14.4 | 2396.4 | 5.8    | 2396.4 | 5.8  | 94.9        |
| DKM-01-10-51  | 1209 | 18699  | 7.9 | 21.3449 | 4.5  | 0.0922 | 5.6  | 0.0143 | 3.3 | 0.60 | 91.3   | 3.0  | 89.5   | 4.8  | 41.6   | 106.9  | 91.3   | 3.0  | NA 1.4, 0.9 |
| DKM-01-10-24  | 765  | 21189  | 4.6 | 21.4352 | 5.2  | 0.0944 | 5.6  | 0.0147 | 2.0 | 0.36 | 93.9   | 1.8  | 91.6   | 4.9  | 31.5   | 125.1  | 93.9   | 1.8  | NA          |
| DKM-01-10-9   | 289  | 3122   | 2.0 | 23.7599 | 16.5 | 0.0854 | 17.4 | 0.0147 | 5.7 | 0.32 | 94.2   | 5.3  | 83.2   | 13.9 | -221.3 | 416.9  | 94.2   | 5.3  | NA          |
| DKM-01-10-1   | 256  | 3707   | 3.3 | 23.7762 | 13.2 | 0.0854 | 14.8 | 0.0147 | 6.7 | 0.45 | 94.3   | 6.3  | 83.2   | 11.8 | -223.0 | 332.4  | 94.3   | 6.3  | NA          |
| DKM-01-10-100 | 518  | 5559   | 1.4 | 22.2395 | 6.8  | 0.0920 | 7.1  | 0.0148 | 2.0 | 0.28 | 95.0   | 1.9  | 89.4   | 6.1  | -57.5  | 165.9  | 95.0   | 1.9  | NA          |
| DKM-01-10-3   | 125  | 3679   | 2.0 | 22.9357 | 40.0 | 0.0895 | 40.6 | 0.0149 | 6.7 | 0.17 | 95.3   | 6.3  | 87.1   | 33.9 | -133.2 | 1025.4 | 95.3   | 6.3  | NA          |
| DKM-01-10-5   | 211  | 3253   | 1.7 | 24.9033 | 31.7 | 0.0829 | 32.0 | 0.0150 | 4.1 | 0.13 | 95.8   | 3.9  | 80.9   | 24.9 |        |        |        |      |             |



|               |      |        |      |         |      |        |      |        |     |      |        |      |        |      |        |       |        |      |             |
|---------------|------|--------|------|---------|------|--------|------|--------|-----|------|--------|------|--------|------|--------|-------|--------|------|-------------|
| DKM-01-10-103 | 352  | 5768   | 2.5  | 23.7027 | 14.8 | 0.0962 | 15.2 | 0.0165 | 3.8 | 0.25 | 105.7  | 4.0  | 93.3   | 13.6 | -215.2 | 372.7 | 105.7  | 4.0  | NA          |
| DKM-01-10-54  | 1360 | 41498  | 6.5  | 20.5374 | 5.6  | 0.1116 | 5.7  | 0.0166 | 1.4 | 0.24 | 106.3  | 1.4  | 107.5  | 5.9  | 133.0  | 131.3 | 106.3  | 1.4  | NA          |
| DKM-01-10-58  | 480  | 11357  | 2.8  | 22.1464 | 9.8  | 0.1078 | 11.2 | 0.0173 | 5.3 | 0.48 | 110.7  | 5.9  | 104.0  | 11.1 | -47.3  | 239.4 | 110.7  | 5.9  | NA          |
| DKM-01-10-4   | 79   | 2292   | 4.5  | 16.0192 | 40.9 | 0.1497 | 41.6 | 0.0174 | 7.7 | 0.18 | 111.2  | 8.5  | 141.6  | 55.1 | 688.7  | 909.2 | 111.2  | 8.5  | NA          |
| DKM-01-10-82  | 184  | 4463   | 3.9  | 22.3124 | 13.3 | 0.1107 | 14.5 | 0.0179 | 5.9 | 0.41 | 114.4  | 6.7  | 106.6  | 14.7 | -65.5  | 325.3 | 114.4  | 6.7  | NA          |
| DKM-01-10-47  | 106  | 4588   | 2.9  | 23.7251 | 26.9 | 0.1365 | 28.5 | 0.0235 | 9.4 | 0.33 | 149.6  | 14.0 | 129.9  | 34.8 | -217.6 | 686.4 | 149.6  | 14.0 | NA          |
| DKM-01-10-97  | 240  | 10336  | 1.9  | 20.0521 | 7.5  | 0.1744 | 8.1  | 0.0254 | 3.0 | 0.37 | 161.5  | 4.8  | 163.2  | 12.2 | 188.9  | 174.5 | 161.5  | 4.8  | NA          |
| DKM-01-10-43  | 230  | 5377   | 1.7  | 20.4917 | 12.9 | 0.1764 | 13.4 | 0.0262 | 3.6 | 0.27 | 166.9  | 5.9  | 165.0  | 20.4 | 138.2  | 304.1 | 166.9  | 5.9  | NA          |
| DKM-01-10-91  | 401  | 33700  | 1.0  | 17.0021 | 1.2  | 0.6870 | 3.0  | 0.0847 | 2.8 | 0.93 | 524.2  | 14.2 | 531.0  | 12.6 | 560.3  | 25.2  | 524.2  | 14.2 | 93.6        |
| DKM-01-10-95  | 300  | 48242  | 2.5  | 13.0976 | 1.0  | 1.8917 | 1.9  | 0.1797 | 1.6 | 0.84 | 1065.3 | 15.4 | 1078.2 | 12.4 | 1104.3 | 20.0  | 1104.3 | 20.0 | 96.5        |
| DKM-01-10-101 | 1183 | 26208  | 2.1  | 10.7879 | 1.0  | 0.9273 | 2.0  | 0.0725 | 1.8 | 0.87 | 451.5  | 7.7  | 666.2  | 10.0 | 1481.7 | 19.1  | 1481.7 | 19.1 | NA          |
| DKM-01-10-105 | 497  | 144481 | 1.9  | 10.1576 | 0.4  | 3.1076 | 4.6  | 0.2289 | 4.6 | 1.00 | 1328.9 | 55.6 | 1434.6 | 35.7 | 1594.9 | 7.8   | 1594.9 | 7.8  | 83.3        |
| DKM-01-10-87  | 402  | 191846 | 2.4  | 9.3286  | 0.5  | 4.7359 | 3.3  | 0.3204 | 3.2 | 0.99 | 1791.8 | 50.4 | 1773.6 | 27.3 | 1752.3 | 8.6   | 1752.3 | 8.6  | 102.3       |
| DKM-01-10-13  | 179  | 48468  | 1.4  | 9.1535  | 0.7  | 4.7979 | 1.6  | 0.3185 | 1.4 | 0.91 | 1782.5 | 22.3 | 1784.5 | 13.2 | 1786.9 | 11.9  | 1786.9 | 11.9 | 99.8        |
| DKM-01-10-72  | 132  | 66881  | 2.0  | 9.1534  | 1.1  | 4.6952 | 1.8  | 0.3117 | 1.5 | 0.81 | 1749.1 | 22.4 | 1766.4 | 15.1 | 1786.9 | 19.3  | 1786.9 | 19.3 | 97.9        |
| DKM-01-10-78  | 41   | 11151  | 0.8  | 9.1439  | 2.9  | 4.6939 | 3.4  | 0.3113 | 1.6 | 0.49 | 1747.0 | 25.1 | 1766.1 | 28.2 | 1788.8 | 53.6  | 1788.8 | 53.6 | 97.7        |
| DKM-01-10-85  | 247  | 40300  | 1.0  | 9.1301  | 0.7  | 4.6441 | 1.8  | 0.3075 | 1.7 | 0.92 | 1728.5 | 25.7 | 1757.2 | 15.4 | 1791.6 | 13.4  | 1791.6 | 13.4 | 96.5        |
| DKM-01-10-2   | 95   | 34491  | 2.5  | 9.0872  | 1.7  | 4.7727 | 2.6  | 0.3146 | 1.9 | 0.76 | 1763.1 | 29.9 | 1780.1 | 21.6 | 1800.1 | 30.6  | 1800.1 | 30.6 | 97.9        |
| DKM-01-10-37  | 106  | 51620  | 1.3  | 9.0630  | 0.9  | 4.8068 | 1.3  | 0.3160 | 0.9 | 0.68 | 1769.9 | 13.3 | 1786.1 | 10.5 | 1805.0 | 16.6  | 1805.0 | 16.6 | 98.1        |
| DKM-01-10-8   | 238  | 78680  | 2.2  | 8.8706  | 0.7  | 5.0967 | 1.3  | 0.3279 | 1.1 | 0.84 | 1828.2 | 17.6 | 1835.6 | 11.2 | 1843.9 | 13.0  | 1843.9 | 13.0 | 99.1        |
| DKM-01-10-70  | 197  | 90843  | 2.4  | 8.8633  | 0.6  | 5.1417 | 1.4  | 0.3305 | 1.3 | 0.91 | 1840.9 | 20.1 | 1843.0 | 11.7 | 1845.4 | 10.0  | 1845.4 | 10.0 | 99.8        |
| DKM-01-10-31  | 174  | 62171  | 0.9  | 8.7969  | 0.7  | 5.0538 | 2.9  | 0.3224 | 2.9 | 0.97 | 1801.6 | 44.9 | 1828.4 | 25.0 | 1859.0 | 12.8  | 1859.0 | 12.8 | 96.9        |
| DKM-01-10-73  | 187  | 67973  | 1.6  | 8.7892  | 0.8  | 5.0225 | 1.6  | 0.3202 | 1.4 | 0.85 | 1790.5 | 21.9 | 1823.1 | 13.9 | 1860.6 | 15.3  | 1860.6 | 15.3 | 96.2        |
| DKM-01-10-25  | 111  | 106275 | 1.6  | 6.9463  | 1.2  | 7.4346 | 1.9  | 0.3746 | 1.5 | 0.77 | 2050.8 | 26.0 | 2165.1 | 17.1 | 2275.4 | 20.8  | 2275.4 | 20.8 | 90.1        |
|               |      |        |      |         |      |        |      |        |     |      |        |      |        |      |        |       |        |      |             |
| MH0110 - 9    | 502  | 9328   | 1.3  | 21.1537 | 8.4  | 0.0928 | 9.1  | 0.0142 | 3.4 | 0.37 | 91.2   | 3.1  | 90.2   | 7.8  | 63.0   | 201.0 | 91.2   | 3.1  | NA 1.3, 0.9 |
| MH0110 - 31   | 450  | 12063  | 2.2  | 20.9192 | 6.1  | 0.0941 | 6.5  | 0.0143 | 2.2 | 0.33 | 91.4   | 2.0  | 91.3   | 5.6  | 89.6   | 144.5 | 91.4   | 2.0  | NA          |
| MH0110 - 33   | 200  | 7303   | 2.8  | 22.8150 | 20.2 | 0.0878 | 21.4 | 0.0145 | 7.0 | 0.33 | 93.0   | 6.5  | 85.5   | 17.5 | -120.2 | 503.2 | 93.0   | 6.5  | NA          |
| MH0110 - 44   | 549  | 19949  | 1.7  | 19.5569 | 6.6  | 0.1025 | 7.2  | 0.0145 | 3.0 | 0.41 | 93.0   | 2.8  | 99.1   | 6.8  | 246.8  | 151.6 | 93.0   | 2.8  | NA          |
| MH0110 - 36   | 939  | 29148  | 1.5  | 20.5528 | 5.6  | 0.0977 | 6.2  | 0.0146 | 2.5 | 0.41 | 93.3   | 2.4  | 94.7   | 5.6  | 131.2  | 132.2 | 93.3   | 2.4  | NA          |
| MH0110 - 102  | 798  | 30269  | 1.7  | 22.2896 | 6.3  | 0.0910 | 6.5  | 0.0147 | 1.3 | 0.21 | 94.1   | 1.3  | 88.4   | 5.5  | -63.0  | 155.0 | 94.1   | 1.3  | NA          |
| MH0110 - 86   | 1319 | 3664   | 2.9  | 20.2498 | 8.2  | 0.1003 | 8.6  | 0.0147 | 2.3 | 0.27 | 94.3   | 2.2  | 97.0   | 7.9  | 166.0  | 192.8 | 94.3   | 2.2  | NA          |
| MH0110 - 42   | 549  | 15652  | 1.3  | 22.3374 | 9.5  | 0.0913 | 9.9  | 0.0148 | 2.5 | 0.26 | 94.7   | 2.4  | 88.7   | 8.4  | -68.2  | 233.6 | 94.7   | 2.4  | NA          |
| MH0110 - 46   | 830  | 23350  | 1.4  | 21.7316 | 6.4  | 0.0950 | 6.6  | 0.0150 | 1.8 | 0.28 | 95.8   | 1.7  | 92.1   | 5.8  | -1.5   | 153.8 | 95.8   | 1.7  | NA          |
| MH0110 - 16   | 793  | 15241  | 2.1  | 18.3074 | 5.0  | 0.1128 | 7.1  | 0.0150 | 5.0 | 0.71 | 95.8   | 4.8  | 108.5  | 7.3  | 396.8  | 112.6 | 95.8   | 4.8  | NA          |
| MH0110 - 69   | 752  | 37768  | 1.7  | 20.5449 | 6.4  | 0.1015 | 6.9  | 0.0151 | 2.6 | 0.38 | 96.8   | 2.5  | 98.2   | 6.5  | 132.1  | 150.8 | 96.8   | 2.5  | NA          |
| MH0110 - 88   | 372  | 19885  | 1.9  | 20.0658 | 10.1 | 0.1047 | 10.4 | 0.0152 | 2.6 | 0.25 | 97.5   | 2.5  | 101.1  | 10.0 | 187.3  | 234.8 | 97.5   | 2.5  | NA          |
| MH0110 - 45   | 734  | 28183  | 2.2  | 21.4033 | 5.1  | 0.0983 | 6.5  | 0.0153 | 4.0 | 0.62 | 97.6   | 3.9  | 95.2   | 5.9  | 35.0   | 121.5 | 97.6   | 3.9  | NA          |
| MH0110 - 57   | 646  | 16628  | 2.4  | 20.7519 | 5.4  | 0.1017 | 6.0  | 0.0153 | 2.5 | 0.42 | 98.0   | 2.5  | 98.4   | 5.6  | 108.5  | 127.8 | 98.0   | 2.5  | NA          |
| MH0110 - 100  | 467  | 6239   | 2.3  | 21.4202 | 10.3 | 0.0987 | 10.5 | 0.0153 | 2.3 | 0.22 | 98.1   | 2.2  | 95.6   | 9.6  | 33.1   | 246.6 | 98.1   | 2.2  | NA          |
| MH0110 - 59   | 976  | 33683  | 1.8  | 21.1805 | 5.0  | 0.0999 | 5.9  | 0.0154 | 3.1 | 0.52 | 98.2   | 3.0  | 96.7   | 5.4  | 60.0   | 119.2 | 98.2   | 3.0  | NA          |
| MH0110 - 12   | 1121 | 44089  | 3.6  | 20.7151 | 5.5  | 0.1024 | 6.4  | 0.0154 | 3.2 | 0.51 | 98.4   | 3.2  | 99.0   | 6.0  | 112.7  | 129.8 | 98.4   | 3.2  | NA          |
| MH0110 - 101  | 1597 | 48090  | 1.2  | 20.9427 | 3.6  | 0.1015 | 4.0  | 0.0154 | 1.6 | 0.39 | 98.6   | 1.5  | 98.2   | 3.7  | 86.9   | 86.5  | 98.6   | 1.5  | NA          |
| MH0110 - 63   | 376  | 16726  | 1.3  | 20.2855 | 8.9  | 0.1057 | 9.9  | 0.0156 | 4.5 | 0.45 | 99.5   | 4.4  | 102.0  | 9.6  | 161.9  | 207.9 | 99.5   | 4.4  | NA          |
| MH0110 - 78   | 675  | 32630  | 2.2  | 21.3188 | 4.3  | 0.1012 | 5.4  | 0.0156 | 3.3 | 0.61 | 100.1  | 3.3  | 97.9   | 5.0  | 44.5   | 101.9 | 100.1  | 3.3  | NA          |
| MH0110 - 79   | 882  | 25941  | 1.9  | 20.7629 | 4.2  | 0.1053 | 4.7  | 0.0159 | 2.2 | 0.47 | 101.4  | 2.2  | 101.6  | 4.6  | 107.3  | 98.4  | 101.4  | 2.2  | NA          |
| MH0110 - 17   | 259  | 12540  | 2.0  | 20.4867 | 11.4 | 0.1067 | 12.1 | 0.0159 | 4.2 | 0.34 | 101.4  | 4.2  | 103.0  | 11.9 | 138.8  | 267.9 | 101.4  | 4.2  | NA          |
| MH0110 - 70   | 1088 | 55679  | 3.7  | 19.8204 | 4.1  | 0.1111 | 6.0  | 0.0160 | 4.4 | 0.73 | 102.2  | 4.5  | 107.0  | 6.1  | 215.9  | 95.0  | 102.2  | 4.5  | NA          |
| MH0110 - 54   | 337  | 4524   | 2.5  | 17.4366 | 20.3 | 0.1287 | 21.1 | 0.0163 | 5.6 | 0.27 | 104.1  | 5.8  | 123.0  | 24.4 | 505.1  | 451.3 | 104.1  | 5.8  | NA          |
| MH0110 - 56   | 1439 | 11149  | 4.1  | 17.2030 | 16.6 | 0.1359 | 17.4 | 0.0170 | 5.2 | 0.30 | 108.4  | 5.6  | 129.4  | 21.1 | 534.6  | 365.4 | 108.4  | 5.6  | NA          |
| MH0110 - 7    | 1008 | 14658  | 3.2  | 20.0369 | 2.2  | 0.1709 | 4.7  | 0.0248 | 4.2 | 0.89 | 158.1  | 6.5  | 160.2  | 7.0  | 190.7  | 51.1  | 158.1  | 6.5  | NA          |
| MH0110 - 41   | 501  | 55251  | 2.7  | 18.9714 | 2.7  | 0.3530 | 6.9  | 0.0486 | 6.3 | 0.92 | 305.7  | 18.8 | 306.9  | 18.2 | 316.3  | 61.9  | 305.7  | 18.8 | NA          |
| MH0110 - 19   | 371  | 40308  | 2.8  | 17.9680 | 3.1  | 0.5371 | 4.8  | 0.0700 | 3.6 | 0.76 | 436.1  | 15.3 | 436.5  | 17.0 | 438.6  | 69.6  | 436.1  | 15.3 | NA          |
| MH0110 - 89   | 503  | 54126  | 2.7  | 18.3026 | 1.4  | 0.5274 | 2.8  | 0.0700 | 2.5 | 0.87 | 436.2  | 10.4 | 430.1  | 10.0 | 397.4  | 31.5  | 436.2  | 10.4 | NA          |
| MH0110 - 39   | 281  | 26187  | 8.4  | 17.3769 | 2.1  | 0.6312 | 3.5  | 0.0795 | 2.8 | 0.80 | 493.4  | 13.4 | 496.8  | 13.8 | 512.6  | 45.9  | 493.4  | 13.4 | 96.3        |
| MH0110 - 104  | 131  | 51671  | 1.0  | 16.2652 | 3.7  | 0.8463 | 5.9  | 0.0998 | 4.5 | 0.77 | 613.5  | 26.6 | 622.6  | 27.3 | 656.1  | 79.7  | 613.5  | 26.6 | 93.5        |
| MH0110 - 5    | 582  | 31126  | 10.5 | 13.9272 | 0.7  | 1.4874 | 2.1  | 0.1502 | 2.0 | 0.95 | 902.3  | 17.0 | 925.2  | 12.9 | 980.3  | 13.9  | 980.3  | 13.9 | 92.0        |
| MH0110 - 40   | 146  | 42171  | 2.6  | 13.8992 | 1.4  | 1.6636 | 2.9  | 0.1677 | 2.6 | 0.88 | 999.4  | 23.8 | 994.7  | 18.6 | 984.4  | 28.2  | 984.4  | 28.2 | 101.5       |
| MH0110 - 65   | 44   | 13773  | 3.2  | 13.8386 | 4.0  | 1.5167 | 5.9  | 0.1522 | 4.4 | 0.74 | 913.4  | 37.1 | 937.2  | 36.2 | 993.3  | 81.2  | 993.3  | 81.2 | 92.0        |
| MH0110 - 99   | 189  | 141253 | 0.8  | 13.4123 | 1.1  | 1.8191 | 3.0  | 0.1770 | 2.8 | 0.93 | 1050.3 | 27.4 | 1052.4 | 19.8 | 1056.6 | 21.7  | 1056.6 | 21.7 | 99.4        |
| MH0110 - 81   | 288  | 281447 | 3.1  | 12.2283 | 0.7  | 2.4317 | 2.6  | 0.2157 | 2.5 | 0.96 | 1258.9 | 28.6 | 1252.0 | 18.6 | 1240.2 | 13.3  | 1240.2 | 13.3 | 101.5       |
| MH0110 - 30   | 496  | 188422 | 1.6  | 11.3565 | 0.4  | 2.9175 | 3.0  | 0.2403 | 2.9 | 0.99 | 1388.3 | 36.6 | 1386.5 | 22.3 | 1383.7 | 7.2   | 1383.7 | 7.2  | 100.3       |
| MH0110 - 103  | 43   | 14478  | 1.2  | 11.1937 | 2.2  | 3.0428 | 6.1  | 0.2470 | 5.6 | 0.93 | 1423.1 | 72.1 | 1418.4 | 46.3 | 1411.4 | 42.2  | 1411.4 | 42.2 | 100.8       |
| MH0110 - 55   | 268  | 561032 | 2.0  | 11.1364 | 0.9  | 2.9997 | 2.3  | 0.2423 | 2.2 | 0.93 | 1398.6 | 27.5 | 1407.5 | 17.9 | 1421.2 | 16.3  | 1421.2 | 16.3 | 98.4        |
| MH0110 - 11   | 42   |        |      |         |      |        |      |        |     |      |        |      |        |      |        |       |        |      |             |

|            |      |        |     |         |      |         |      |        |     |      |        |      |        |      |        |       |        |      |             |
|------------|------|--------|-----|---------|------|---------|------|--------|-----|------|--------|------|--------|------|--------|-------|--------|------|-------------|
|            |      |        |     |         |      |         |      |        |     |      |        |      |        |      |        |       |        |      |             |
| 560410 -39 | 436  | 10251  | 1.7 | 21.0396 | 7.5  | 0.0910  | 8.3  | 0.0139 | 3.4 | 0.41 | 88.9   | 3.0  | 88.4   | 7.0  | 75.9   | 179.5 | 88.9   | 3.0  | NA 1.2, 0.9 |
| 560410 -32 | 237  | 3588   | 1.9 | 17.4527 | 33.8 | 0.1110  | 34.6 | 0.0140 | 7.3 | 0.21 | 89.9   | 6.5  | 106.9  | 35.1 | 503.0  | 764.3 | 89.9   | 6.5  | NA          |
| 560410 -29 | 1209 | 21432  | 1.4 | 21.0893 | 2.9  | 0.0925  | 3.0  | 0.0142 | 0.9 | 0.30 | 90.6   | 0.8  | 89.9   | 2.6  | 70.3   | 68.0  | 90.6   | 0.8  | NA          |
| 560410 -13 | 993  | 20505  | 1.4 | 21.9999 | 4.1  | 0.0890  | 4.6  | 0.0142 | 2.1 | 0.45 | 90.8   | 1.9  | 86.5   | 3.8  | -31.2  | 98.6  | 90.8   | 1.9  | NA          |
| 560410 -14 | 899  | 33278  | 2.5 | 21.4530 | 3.0  | 0.0936  | 3.4  | 0.0146 | 1.6 | 0.47 | 93.2   | 1.5  | 90.8   | 3.0  | 29.4   | 71.9  | 93.2   | 1.5  | NA          |
| 560410 -26 | 621  | 21771  | 2.1 | 20.5920 | 6.1  | 0.0975  | 6.8  | 0.0146 | 3.0 | 0.44 | 93.2   | 2.8  | 94.5   | 6.2  | 126.8  | 144.5 | 93.2   | 2.8  | NA          |
| 560410 -31 | 604  | 12310  | 2.0 | 21.2185 | 8.0  | 0.0960  | 8.9  | 0.0148 | 3.9 | 0.44 | 94.6   | 3.7  | 93.1   | 7.9  | 55.8   | 189.9 | 94.6   | 3.7  | NA          |
| 560410 -15 | 418  | 1308   | 1.7 | 18.2413 | 15.0 | 0.1122  | 15.5 | 0.0149 | 3.7 | 0.24 | 95.0   | 3.5  | 108.0  | 15.9 | 404.9  | 338.5 | 95.0   | 3.5  | NA          |
| 560410 -18 | 551  | 11723  | 1.3 | 21.3151 | 6.7  | 0.0965  | 7.3  | 0.0149 | 2.9 | 0.40 | 95.4   | 2.8  | 93.5   | 6.5  | 44.9   | 160.2 | 95.4   | 2.8  | NA          |
| 560410 -35 | 631  | 30900  | 1.6 | 20.4673 | 7.8  | 0.1007  | 8.0  | 0.0149 | 2.1 | 0.26 | 95.6   | 2.0  | 97.4   | 7.4  | 141.1  | 182.2 | 95.6   | 2.0  | NA          |
| 560410 -38 | 382  | 7240   | 2.3 | 22.6497 | 13.2 | 0.0919  | 13.3 | 0.0151 | 2.0 | 0.15 | 96.6   | 1.9  | 89.3   | 11.4 | -102.3 | 325.5 | 96.6   | 1.9  | NA          |
| 560410 -28 | 223  | 7774   | 2.0 | 22.6178 | 33.5 | 0.0922  | 33.7 | 0.0151 | 3.6 | 0.11 | 96.8   | 3.5  | 89.6   | 28.9 | -98.8  | 843.4 | 96.8   | 3.5  | NA          |
| 560410 -33 | 422  | 31856  | 2.3 | 22.8012 | 5.8  | 0.0919  | 6.5  | 0.0152 | 3.1 | 0.47 | 97.2   | 3.0  | 89.3   | 5.6  | -118.7 | 142.7 | 97.2   | 3.0  | NA          |
| 560410 -12 | 670  | 16884  | 1.5 | 19.4685 | 5.0  | 0.1079  | 5.4  | 0.0152 | 1.9 | 0.36 | 97.5   | 1.8  | 104.1  | 5.3  | 257.2  | 115.3 | 97.5   | 1.8  | NA          |
| 560410 -21 | 199  | 2929   | 3.5 | 25.2300 | 22.4 | 0.0836  | 22.9 | 0.0153 | 4.6 | 0.20 | 97.8   | 4.5  | 81.5   | 17.9 | -374.6 | 587.6 | 97.8   | 4.5  | NA          |
| 560410 -9  | 889  | 4715   | 1.8 | 19.7175 | 5.3  | 0.1070  | 7.5  | 0.0153 | 5.2 | 0.70 | 97.9   | 5.1  | 103.2  | 7.3  | 228.0  | 122.9 | 97.9   | 5.1  | NA          |
| 560410 -42 | 472  | 11896  | 1.6 | 22.4299 | 9.7  | 0.0942  | 10.7 | 0.0153 | 4.4 | 0.41 | 98.1   | 4.3  | 91.4   | 9.3  | -78.3  | 238.1 | 98.1   | 4.3  | NA          |
| 560410 -34 | 326  | 16306  | 3.1 | 21.4732 | 14.6 | 0.0990  | 15.1 | 0.0154 | 3.8 | 0.25 | 98.7   | 3.7  | 95.9   | 13.8 | 27.2   | 352.2 | 98.7   | 3.7  | NA          |
| 560410 -41 | 493  | 17902  | 1.5 | 18.6073 | 9.4  | 0.1147  | 9.8  | 0.0155 | 2.8 | 0.29 | 99.1   | 2.8  | 110.3  | 10.3 | 360.2  | 213.0 | 99.1   | 2.8  | NA          |
| 560410 -22 | 760  | 28635  | 2.4 | 20.4310 | 9.5  | 0.1050  | 10.4 | 0.0156 | 4.3 | 0.42 | 99.6   | 4.3  | 101.4  | 10.1 | 145.2  | 222.8 | 99.6   | 4.3  | NA          |
| 560410 -24 | 625  | 21963  | 2.3 | 20.9553 | 7.2  | 0.1025  | 7.4  | 0.0156 | 1.8 | 0.24 | 99.7   | 1.7  | 99.1   | 7.0  | 85.5   | 170.3 | 99.7   | 1.7  | NA          |
| 560410 -23 | 518  | 4594   | 1.2 | 18.0036 | 17.8 | 0.1215  | 18.7 | 0.0159 | 5.5 | 0.29 | 101.4  | 5.5  | 116.4  | 20.5 | 434.2  | 400.4 | 101.4  | 5.5  | NA          |
| 560410 -36 | 424  | 13772  | 1.8 | 21.5787 | 11.0 | 0.1018  | 11.6 | 0.0159 | 3.7 | 0.32 | 101.9  | 3.7  | 98.4   | 10.9 | 15.4   | 264.7 | 101.9  | 3.7  | NA          |
| 560410 -10 | 405  | 4021   | 2.8 | 20.8018 | 17.7 | 0.1058  | 18.3 | 0.0160 | 4.8 | 0.26 | 102.1  | 4.9  | 102.2  | 17.8 | 102.9  | 420.4 | 102.1  | 4.9  | NA          |
| 560410 -19 | 482  | 3705   | 1.5 | 16.6544 | 17.3 | 0.1337  | 17.5 | 0.0161 | 3.0 | 0.17 | 103.2  | 3.1  | 127.4  | 21.0 | 605.1  | 376.4 | 103.2  | 3.1  | NA          |
| 560410 -44 | 982  | 29849  | 2.1 | 19.9584 | 3.9  | 0.1127  | 5.8  | 0.0163 | 4.3 | 0.74 | 104.3  | 4.4  | 108.4  | 6.0  | 199.8  | 91.5  | 104.3  | 4.4  | NA          |
| 560410 -30 | 307  | 7705   | 1.9 | 18.9309 | 12.3 | 0.1192  | 12.8 | 0.0164 | 3.5 | 0.28 | 104.6  | 3.7  | 114.3  | 13.8 | 321.3  | 280.1 | 104.6  | 3.7  | NA          |
| 560410 -25 | 640  | 4412   | 4.5 | 17.6720 | 1.6  | 0.5512  | 2.8  | 0.0706 | 2.3 | 0.81 | 440.1  | 9.6  | 445.8  | 10.0 | 475.4  | 35.8  | 440.1  | 9.6  | NA          |
| 560410 -37 | 282  | 102425 | 0.6 | 16.2600 | 1.5  | 0.8348  | 2.5  | 0.0984 | 2.0 | 0.80 | 605.3  | 11.6 | 616.3  | 11.6 | 656.8  | 32.2  | 605.3  | 11.6 | 92.2        |
| 560410 -17 | 171  | 58730  | 1.6 | 9.2465  | 0.8  | 4.6402  | 2.9  | 0.3112 | 2.8 | 0.96 | 1746.5 | 42.5 | 1756.5 | 24.2 | 1768.4 | 14.9  | 1768.4 | 14.9 | 98.8        |
| 560410 -8  | 86   | 50753  | 0.9 | 8.5221  | 0.7  | 5.5020  | 1.8  | 0.3401 | 1.7 | 0.92 | 1887.0 | 27.8 | 1900.9 | 15.9 | 1916.1 | 13.0  | 1916.1 | 13.0 | 98.5        |
| 560410 -40 | 209  | 32199  | 1.2 | 5.4580  | 0.3  | 11.2590 | 4.5  | 0.4457 | 4.5 | 1.00 | 2376.1 | 88.8 | 2544.8 | 41.8 | 2682.2 | 4.4   | 2682.2 | 4.4  | 88.6        |
|            |      |        |     |         |      |         |      |        |     |      |        |      |        |      |        |       |        |      |             |
| BHB001-20  | 489  | 3235   | 3.2 | 20.8452 | 6.0  | 0.0995  | 6.3  | 0.0150 | 1.9 | 0.29 | 96.3   | 1.8  | 96.3   | 5.8  | 97.9   | 142.5 | 96.3   | 1.8  | NA 1.3, 1.0 |
| BHB001-62  | 300  | 3340   | 2.2 | 21.3521 | 6.5  | 0.0973  | 6.6  | 0.0151 | 1.0 | 0.15 | 96.5   | 1.0  | 94.3   | 5.9  | 40.7   | 155.3 | 96.5   | 1.0  | NA          |
| BHB001-92  | 548  | 5270   | 1.5 | 21.0135 | 3.4  | 0.0990  | 4.4  | 0.0151 | 2.8 | 0.64 | 96.5   | 2.7  | 95.8   | 4.0  | 78.8   | 80.3  | 96.5   | 2.7  | NA          |
| BHB001-85  | 615  | 4035   | 1.6 | 21.5991 | 4.8  | 0.0964  | 4.9  | 0.0151 | 1.0 | 0.20 | 96.6   | 1.0  | 93.4   | 4.4  | 13.2   | 115.3 | 96.6   | 1.0  | NA          |
| BHB001-6   | 168  | 2120   | 1.1 | 21.2380 | 11.9 | 0.0981  | 12.2 | 0.0151 | 2.4 | 0.20 | 96.6   | 2.3  | 95.0   | 11.0 | 53.5   | 285.6 | 96.6   | 2.3  | NA          |
| BHB001-93  | 437  | 5880   | 1.8 | 20.8715 | 3.5  | 0.0998  | 3.7  | 0.0151 | 1.4 | 0.38 | 96.6   | 1.4  | 96.6   | 3.5  | 94.9   | 81.9  | 96.6   | 1.4  | NA          |
| BHB001-95  | 496  | 5855   | 1.8 | 20.8922 | 3.7  | 0.0997  | 3.8  | 0.0151 | 1.0 | 0.26 | 96.7   | 1.0  | 96.5   | 3.5  | 92.6   | 86.8  | 96.7   | 1.0  | NA          |
| BHB001-50  | 347  | 2610   | 1.8 | 22.3448 | 5.4  | 0.0933  | 5.6  | 0.0151 | 1.3 | 0.24 | 96.7   | 1.3  | 90.5   | 4.8  | -69.1  | 132.4 | 96.7   | 1.3  | NA          |
| BHB001-77  | 306  | 4795   | 2.6 | 21.1844 | 6.0  | 0.0984  | 6.5  | 0.0151 | 2.5 | 0.39 | 96.8   | 2.4  | 95.3   | 5.9  | 59.6   | 143.1 | 96.8   | 2.4  | NA          |
| BHB001-63  | 197  | 7290   | 1.6 | 20.3537 | 6.6  | 0.1026  | 7.1  | 0.0151 | 2.5 | 0.35 | 96.9   | 2.4  | 99.1   | 6.7  | 154.1  | 155.5 | 96.9   | 2.4  | NA          |
| BHB001-58  | 250  | 3360   | 1.3 | 22.0455 | 7.4  | 0.0948  | 7.8  | 0.0152 | 2.6 | 0.34 | 97.0   | 2.5  | 92.0   | 6.9  | -36.2  | 178.7 | 97.0   | 2.5  | NA          |
| BHB001-82  | 288  | 3275   | 1.0 | 20.8941 | 3.9  | 0.1002  | 4.7  | 0.0152 | 2.5 | 0.54 | 97.2   | 2.4  | 97.0   | 4.3  | 92.4   | 92.8  | 97.2   | 2.4  | NA          |
| BHB001-13  | 226  | 4830   | 2.7 | 23.1944 | 5.5  | 0.0904  | 5.7  | 0.0152 | 1.6 | 0.28 | 97.3   | 1.5  | 87.9   | 4.8  | -161.0 | 136.4 | 97.3   | 1.5  | NA          |
| BHB001-94  | 369  | 4510   | 3.1 | 20.4685 | 3.7  | 0.1027  | 4.3  | 0.0152 | 2.2 | 0.50 | 97.5   | 2.1  | 99.3   | 4.1  | 140.9  | 87.6  | 97.5   | 2.1  | NA          |
| BHB001-51  | 262  | 2265   | 3.4 | 21.9961 | 8.1  | 0.0956  | 8.2  | 0.0152 | 1.5 | 0.18 | 97.6   | 1.4  | 92.7   | 7.3  | -30.8  | 196.4 | 97.6   | 1.4  | NA          |
| BHB001-70  | 363  | 3005   | 1.6 | 21.2969 | 7.0  | 0.0988  | 7.0  | 0.0153 | 1.0 | 0.14 | 97.6   | 1.0  | 95.7   | 6.4  | 46.9   | 166.4 | 97.6   | 1.0  | NA          |
| BHB001-79  | 447  | 3495   | 1.5 | 21.8143 | 5.3  | 0.0965  | 6.2  | 0.0153 | 3.2 | 0.51 | 97.7   | 3.1  | 93.5   | 5.6  | -10.7  | 128.8 | 97.7   | 3.1  | NA          |
| BHB001-38  | 875  | 5110   | 3.1 | 20.3689 | 4.5  | 0.1034  | 4.6  | 0.0153 | 1.0 | 0.22 | 97.7   | 1.0  | 99.9   | 4.4  | 152.3  | 105.8 | 97.7   | 1.0  | NA          |
| BHB001-39  | 331  | 5100   | 2.1 | 21.9919 | 6.6  | 0.0958  | 6.8  | 0.0153 | 1.7 | 0.25 | 97.8   | 1.6  | 92.9   | 6.0  | -30.3  | 159.8 | 97.8   | 1.6  | NA          |
| BHB001-7   | 955  | 11655  | 2.0 | 20.3370 | 3.7  | 0.1038  | 5.5  | 0.0153 | 4.0 | 0.74 | 98.0   | 3.9  | 100.3  | 5.2  | 156.0  | 85.9  | 98.0   | 3.9  | NA          |
| BHB001-60  | 374  | 4255   | 1.7 | 21.3210 | 4.7  | 0.0992  | 4.8  | 0.0153 | 1.0 | 0.21 | 98.1   | 1.0  | 96.0   | 4.4  | 44.2   | 112.7 | 98.1   | 1.0  | NA          |
| BHB001-68  | 336  | 5025   | 2.1 | 20.9063 | 3.8  | 0.1012  | 4.1  | 0.0153 | 1.4 | 0.33 | 98.1   | 1.3  | 97.9   | 3.8  | 91.0   | 90.7  | 98.1   | 1.3  | NA          |
| BHB001-75  | 579  | 7365   | 2.9 | 20.8654 | 3.2  | 0.1014  | 3.4  | 0.0153 | 1.2 | 0.34 | 98.1   | 1.1  | 98.0   | 3.2  | 95.6   | 76.2  | 98.1   | 1.1  | NA          |
| BHB001-12  | 459  | 4990   | 1.9 | 21.8538 | 6.6  | 0.0968  | 7.6  | 0.0153 | 3.7 | 0.49 | 98.2   | 3.6  | 93.8   | 6.8  | -15.1  | 160.5 | 98.2   | 3.6  | NA          |
| BHB001-48  | 254  | 3965   | 2.7 | 20.0729 | 5.0  | 0.1054  | 6.1  | 0.0154 | 3.6 | 0.58 | 98.2   | 3.5  | 101.8  | 5.9  | 186.5  | 115.7 | 98.2   | 3.5  | NA          |
| BHB001-29  | 280  | 3635   | 1.9 | 19.9326 | 8.8  | 0.1062  | 8.9  | 0.0154 | 1.1 | 0.13 | 98.2   | 1.1  | 102.5  | 8.7  | 202.8  | 205.0 | 98.2   | 1.1  | NA          |
| BHB001-17  | 691  | 8980   | 2.9 | 21.2381 | 3.4  | 0.0997  | 3.5  | 0.0154 | 1.0 | 0.28 | 98.3   | 1.0  | 96.5   | 3.3  | 53.5   | 81.0  | 98.3   | 1.0  | NA          |
| BHB001-1   | 435  | 5275   | 2.8 | 20.9176 | 4.4  | 0.1012  | 4.6  | 0.0154 | 1.0 | 0.22 | 98.3   | 1.0  | 97.9   | 4.3  | 89.7   | 105.5 | 98.3   | 1.0  | NA          |
| BHB001-87  | 321  | 3940   | 2.1 | 9.5603  | 7.9  | 0.2221  | 8.0  | 0.0154 | 1.4 | 0.17 | 98.5   | 1.3  | 203.7  | 14.9 | 1707.3 | 146.2 | 98.5   | 1.3  | NA          |
| BHB001-32  | 325  | 3115   | 1.4 | 20.6153 | 6.5  | 0.1031  | 6.6  | 0.0154 | 1.0 | 0.15 | 98.6   | 1.0  | 99.7   | 6.2  | 124.1  | 153.0 | 98.6   | 1.0  | NA          |
| BHB001-45  | 297  | 4250   | 1.6 | 20.9912 | 5.6  | 0.1013  | 5.8  | 0.0154 | 1.7 | 0.29 | 98.7   | 1.7  | 98.0   | 5.5  | 81.4   | 132.8 | 98.7   | 1.7  | NA          |
| BHB001-24  | 290  | 4920   | 1.5 | 21.2500 | 2.8  | 0.1001  | 3.8  | 0.0154 | 2.6 | 0.69 | 98.7   | 2.6  | 96.9   | 3.5  | 52.2   | 66.2  | 98.7   | 2.6  | NA          |
| BHB001-36  | 593  | 7080   | 1.9 | 20.5419 | 4.6  | 0.1039  | 4.7  | 0.0155 | 1.1 | 0.23 | 99.0   | 1.1  | 100.3  | 4.5  | 132.5  | 108.2 | 99.0   | 1.1  | NA          |



|              |      |        |     |         |      |         |      |        |      |      |        |      |        |      |        |        |        |      |             |
|--------------|------|--------|-----|---------|------|---------|------|--------|------|------|--------|------|--------|------|--------|--------|--------|------|-------------|
| BHB001-30    | 158  | 52685  | 3.4 | 8.3347  | 1.3  | 5.8140  | 1.6  | 0.3514 | 1.0  | 0.61 | 1941.5 | 16.8 | 1948.5 | 14.1 | 1955.9 | 23.0   | 1955.9 | 23.0 | 99.3        |
| BHB001-89    | 108  | 8390   | 1.8 | 8.3011  | 1.8  | 5.4289  | 2.3  | 0.3269 | 1.5  | 0.63 | 1823.1 | 23.0 | 1889.4 | 19.7 | 1963.1 | 31.8   | 1963.1 | 31.8 | 92.9        |
| BHB001-11    | 184  | 27105  | 2.5 | 8.1731  | 1.1  | 5.8217  | 1.5  | 0.3451 | 1.0  | 0.66 | 1911.1 | 16.5 | 1949.6 | 13.1 | 1990.8 | 20.1   | 1990.8 | 20.1 | 96.0        |
| BHB001-64    | 73   | 14870  | 1.6 | 7.5663  | 1.8  | 6.7362  | 2.0  | 0.3697 | 1.0  | 0.50 | 2027.8 | 17.9 | 2077.4 | 18.1 | 2126.9 | 31.0   | 2126.9 | 31.0 | 95.3        |
| BHB001-90    | 17   | 2960   | 2.1 | 6.9790  | 3.4  | 7.6520  | 3.6  | 0.3873 | 1.0  | 0.28 | 2110.4 | 18.0 | 2191.0 | 32.2 | 2267.3 | 59.3   | 2267.3 | 59.3 | 93.1        |
| BHB001-54    | 418  | 55905  | 2.6 | 6.2067  | 1.9  | 10.3261 | 2.3  | 0.4648 | 1.3  | 0.57 | 2460.9 | 26.8 | 2464.4 | 21.2 | 2467.4 | 31.8   | 2467.4 | 31.8 | 99.7        |
| BHB001-5     | 78   | 21445  | 0.9 | 6.0410  | 2.2  | 8.7129  | 2.5  | 0.3817 | 1.2  | 0.49 | 2084.4 | 21.4 | 2308.4 | 22.5 | 2513.0 | 36.3   | 2513.0 | 36.3 | 82.9        |
| BHB001-4     | 65   | 31985  | 1.0 | 5.3245  | 1.5  | 13.8862 | 1.8  | 0.5362 | 1.0  | 0.57 | 2767.7 | 23.0 | 2742.0 | 17.0 | 2723.1 | 24.4   | 2723.1 | 24.4 | 101.6       |
| BHB001-10    | 581  | 202190 | 2.2 | 5.2972  | 1.0  | 13.4361 | 2.1  | 0.5162 | 1.9  | 0.88 | 2683.0 | 41.0 | 2710.8 | 20.0 | 2731.6 | 16.5   | 2731.6 | 16.5 | 98.2        |
|              |      |        |     |         |      |         |      |        |      |      |        |      |        |      |        |        |        |      |             |
|              |      |        |     |         |      |         |      |        |      |      |        |      |        |      |        |        |        |      |             |
| 560110 - 22  | 281  | 8385   | 3.1 | 17.7200 | 15.2 | 0.1032  | 20.3 | 0.0133 | 13.4 | 0.66 | 85.0   | 11.3 | 99.8   | 19.3 | 469.5  | 337.9  | 85.0   | 11.3 | NA 2.1, 1.0 |
| 560110 - 36  | 292  | 6015   | 4.2 | 23.7788 | 14.7 | 0.0777  | 19.4 | 0.0134 | 12.6 | 0.65 | 85.8   | 10.7 | 76.0   | 14.2 | -223.3 | 372.5  | 85.8   | 10.7 | NA          |
| 560110 - 93  | 265  | 9156   | 3.4 | 21.6469 | 20.0 | 0.0889  | 21.9 | 0.0140 | 8.8  | 0.40 | 89.4   | 7.8  | 86.5   | 18.2 | 7.8    | 486.4  | 89.4   | 7.8  | NA          |
| 560110 - 10  | 987  | 19015  | 1.5 | 20.6054 | 8.2  | 0.0937  | 9.2  | 0.0140 | 4.2  | 0.46 | 89.7   | 3.8  | 91.0   | 8.0  | 125.2  | 192.9  | 89.7   | 3.8  | NA          |
| 560110 - 30  | 356  | 8732   | 2.9 | 18.4281 | 17.0 | 0.1071  | 17.3 | 0.0143 | 3.1  | 0.18 | 91.6   | 2.8  | 103.3  | 16.9 | 382.0  | 384.0  | 91.6   | 2.8  | NA          |
| 560110 - 69  | 898  | 15765  | 1.4 | 20.4302 | 4.5  | 0.0967  | 4.9  | 0.0143 | 1.9  | 0.38 | 91.7   | 1.7  | 93.7   | 4.4  | 145.3  | 106.4  | 91.7   | 1.7  | NA          |
| 560110 - 3   | 498  | 13275  | 2.4 | 18.6046 | 13.3 | 0.1065  | 14.9 | 0.0144 | 6.7  | 0.45 | 92.0   | 6.1  | 102.8  | 14.6 | 360.6  | 301.6  | 92.0   | 6.1  | NA          |
| 560110 - 78  | 562  | 38313  | 4.0 | 20.5124 | 15.7 | 0.0972  | 18.1 | 0.0145 | 8.8  | 0.49 | 92.6   | 8.1  | 94.2   | 16.2 | 135.9  | 371.8  | 92.6   | 8.1  | NA          |
| 560110 - 68  | 222  | 9063   | 1.5 | 28.0584 | 36.4 | 0.0712  | 37.1 | 0.0145 | 7.1  | 0.19 | 92.7   | 6.6  | 69.8   | 25.0 | -658.5 | 1028.7 | 92.7   | 6.6  | NA          |
| 560110 - 94  | 841  | 9290   | 3.4 | 20.2380 | 11.5 | 0.0988  | 16.6 | 0.0145 | 12.0 | 0.72 | 92.8   | 11.0 | 95.7   | 15.1 | 167.4  | 268.5  | 92.8   | 11.0 | NA          |
| 560110 - 8   | 332  | 7026   | 4.1 | 24.9547 | 28.1 | 0.0802  | 28.4 | 0.0145 | 3.8  | 0.13 | 92.9   | 3.5  | 78.3   | 21.4 | -346.2 | 737.2  | 92.9   | 3.5  | NA          |
| 560110 - 4   | 304  | 7240   | 1.5 | 23.3794 | 23.2 | 0.0860  | 23.6 | 0.0146 | 4.0  | 0.17 | 93.3   | 3.7  | 83.8   | 19.0 | -180.8 | 586.7  | 93.3   | 3.7  | NA          |
| 560110 - 9   | 262  | 8942   | 2.3 | 27.0075 | 38.1 | 0.0747  | 38.5 | 0.0146 | 5.6  | 0.15 | 93.6   | 5.2  | 73.1   | 27.1 | -554.6 | 1056.7 | 93.6   | 5.2  | NA          |
| 560110 - 12  | 1406 | 51332  | 2.5 | 21.2694 | 5.1  | 0.0949  | 5.3  | 0.0146 | 1.4  | 0.26 | 93.6   | 1.3  | 92.0   | 4.6  | 50.0   | 121.2  | 93.6   | 1.3  | NA          |
| 560110 - 54  | 208  | 6644   | 1.6 | 19.0738 | 23.4 | 0.1061  | 23.9 | 0.0147 | 5.1  | 0.21 | 94.0   | 4.7  | 102.4  | 23.3 | 304.1  | 539.3  | 94.0   | 4.7  | NA          |
| 560110 - 90  | 356  | 7573   | 1.4 | 23.3029 | 28.7 | 0.0873  | 30.2 | 0.0148 | 9.6  | 0.32 | 94.4   | 9.0  | 85.0   | 24.6 | -172.6 | 727.0  | 94.4   | 9.0  | NA          |
| 560110 - 15  | 357  | 15994  | 3.1 | 18.6850 | 12.9 | 0.1097  | 13.9 | 0.0149 | 5.1  | 0.36 | 95.2   | 4.8  | 105.7  | 13.9 | 350.8  | 293.4  | 95.2   | 4.8  | NA          |
| 560110 - 27  | 171  | 4034   | 2.2 | 22.1482 | 31.5 | 0.0926  | 32.5 | 0.0149 | 8.2  | 0.25 | 95.2   | 7.7  | 89.9   | 28.0 | -47.5  | 782.6  | 95.2   | 7.7  | NA          |
| 560110 - 40  | 272  | 9420   | 1.7 | 19.9847 | 17.3 | 0.1029  | 18.1 | 0.0149 | 5.1  | 0.28 | 95.5   | 4.9  | 99.5   | 17.1 | 196.8  | 405.1  | 95.5   | 4.9  | NA          |
| 560110 - 75  | 328  | 8710   | 1.4 | 21.0801 | 18.5 | 0.0980  | 19.2 | 0.0150 | 5.2  | 0.27 | 95.9   | 4.9  | 94.9   | 17.4 | 71.3   | 442.7  | 95.9   | 4.9  | NA          |
| 560110 - 53  | 344  | 12761  | 1.4 | 19.3771 | 13.8 | 0.1066  | 14.9 | 0.0150 | 5.7  | 0.38 | 95.9   | 5.4  | 102.9  | 14.6 | 268.0  | 317.9  | 95.9   | 5.4  | NA          |
| 560110 - 7   | 473  | 12271  | 3.2 | 21.2044 | 13.0 | 0.0975  | 15.1 | 0.0150 | 7.7  | 0.51 | 95.9   | 7.3  | 94.4   | 13.6 | 57.3   | 310.6  | 95.9   | 7.3  | NA          |
| 560110 - 72  | 371  | 10728  | 1.8 | 18.8063 | 6.1  | 0.1102  | 11.6 | 0.0150 | 9.8  | 0.85 | 96.2   | 9.4  | 106.2  | 11.7 | 336.2  | 138.2  | 96.2   | 9.4  | NA          |
| 560110 - 39  | 639  | 14426  | 1.9 | 21.2693 | 9.6  | 0.0978  | 9.8  | 0.0151 | 2.0  | 0.20 | 96.5   | 1.9  | 94.7   | 8.8  | 50.0   | 229.1  | 96.5   | 1.9  | NA          |
| 560110 - 92  | 613  | 18815  | 6.6 | 20.6945 | 11.3 | 0.1005  | 12.8 | 0.0151 | 6.0  | 0.47 | 96.6   | 5.8  | 97.3   | 11.9 | 115.0  | 268.0  | 96.6   | 5.8  | NA          |
| 560110 - 43  | 932  | 15219  | 2.8 | 21.8836 | 6.7  | 0.0953  | 6.9  | 0.0151 | 1.9  | 0.27 | 96.7   | 1.8  | 92.4   | 6.1  | -18.4  | 161.5  | 96.7   | 1.8  | NA          |
| 560110 - 57  | 560  | 8312   | 2.5 | 24.8996 | 11.7 | 0.0840  | 13.0 | 0.0152 | 5.5  | 0.43 | 97.0   | 5.3  | 81.9   | 10.2 | -340.6 | 302.8  | 97.0   | 5.3  | NA          |
| 560110 - 1   | 287  | 3843   | 2.5 | 20.3743 | 12.1 | 0.1028  | 12.3 | 0.0152 | 2.5  | 0.20 | 97.2   | 2.4  | 99.4   | 11.7 | 151.7  | 283.7  | 97.2   | 2.4  | NA          |
| 560110 - 79  | 1032 | 23821  | 2.9 | 20.9156 | 8.9  | 0.1003  | 9.5  | 0.0152 | 3.2  | 0.34 | 97.3   | 3.1  | 97.0   | 8.8  | 89.9   | 211.9  | 97.3   | 3.1  | NA          |
| 560110 - 37  | 316  | 10004  | 5.8 | 20.3310 | 13.5 | 0.1036  | 14.2 | 0.0153 | 4.4  | 0.31 | 97.7   | 4.3  | 100.1  | 13.5 | 156.7  | 316.3  | 97.7   | 4.3  | NA          |
| 560110 - 76  | 328  | 12303  | 2.5 | 22.7289 | 18.8 | 0.0929  | 20.7 | 0.0153 | 8.6  | 0.42 | 98.0   | 8.4  | 90.2   | 17.9 | -110.8 | 467.0  | 98.0   | 8.4  | NA          |
| 560110 - 86  | 446  | 15479  | 1.6 | 21.0481 | 16.6 | 0.1004  | 16.9 | 0.0153 | 3.2  | 0.19 | 98.0   | 3.1  | 97.1   | 15.7 | 75.0   | 396.9  | 98.0   | 3.1  | NA          |
| 560110 - 28  | 776  | 25600  | 2.3 | 21.4194 | 5.9  | 0.0989  | 6.6  | 0.0154 | 2.9  | 0.44 | 98.3   | 2.9  | 95.8   | 6.1  | 33.2   | 142.5  | 98.3   | 2.9  | NA          |
| 560110 - 52  | 169  | 3000   | 2.3 | 20.9821 | 37.5 | 0.1010  | 37.9 | 0.0154 | 5.5  | 0.14 | 98.3   | 5.4  | 97.7   | 35.3 | 82.4   | 918.6  | 98.3   | 5.4  | NA          |
| 560110 - 49  | 342  | 7917   | 2.2 | 27.1022 | 24.3 | 0.0786  | 25.4 | 0.0154 | 7.3  | 0.29 | 98.8   | 7.1  | 76.8   | 18.8 | -564.0 | 663.3  | 98.8   | 7.1  | NA          |
| 560110 - 66  | 408  | 8525   | 1.6 | 24.1282 | 17.1 | 0.0883  | 17.7 | 0.0155 | 4.4  | 0.25 | 98.9   | 4.3  | 86.0   | 14.6 | -260.1 | 436.1  | 98.9   | 4.3  | NA          |
| 560110 - 26  | 529  | 9462   | 1.9 | 20.3864 | 9.8  | 0.1046  | 11.9 | 0.0155 | 6.8  | 0.57 | 99.0   | 6.7  | 101.1  | 11.5 | 150.3  | 230.1  | 99.0   | 6.7  | NA          |
| 560110 - 96  | 444  | 15809  | 2.5 | 22.6151 | 7.7  | 0.0944  | 8.8  | 0.0155 | 4.2  | 0.48 | 99.1   | 4.1  | 91.6   | 7.7  | -98.5  | 190.1  | 99.1   | 4.1  | NA          |
| 560110 - 87  | 359  | 11397  | 2.2 | 25.0125 | 21.4 | 0.0854  | 21.8 | 0.0155 | 4.2  | 0.19 | 99.1   | 4.1  | 83.2   | 17.4 | -352.2 | 558.0  | 99.1   | 4.1  | NA          |
| 560110 - 80  | 212  | 10181  | 3.7 | 19.6449 | 12.6 | 0.1093  | 14.5 | 0.0156 | 7.1  | 0.49 | 99.6   | 7.0  | 105.4  | 14.5 | 236.5  | 292.4  | 99.6   | 7.0  | NA          |
| 560110 - 29  | 699  | 19728  | 1.7 | 20.5116 | 6.1  | 0.1051  | 7.1  | 0.0156 | 3.6  | 0.51 | 100.0  | 3.6  | 101.4  | 6.8  | 136.0  | 142.5  | 100.0  | 3.6  | NA          |
| 560110 - 18  | 352  | 21339  | 2.1 | 20.2195 | 19.5 | 0.1069  | 19.7 | 0.0157 | 3.1  | 0.15 | 100.3  | 3.0  | 103.1  | 19.4 | 169.5  | 458.9  | 100.3  | 3.0  | NA          |
| 560110 - 62  | 855  | 24434  | 3.1 | 20.7266 | 3.4  | 0.1048  | 4.8  | 0.0158 | 3.4  | 0.71 | 100.8  | 3.4  | 101.2  | 4.6  | 111.4  | 79.6   | 100.8  | 3.4  | NA          |
| 560110 - 98  | 419  | 9604   | 1.9 | 20.1064 | 15.1 | 0.1081  | 16.2 | 0.0158 | 6.0  | 0.37 | 100.8  | 6.0  | 104.2  | 16.1 | 182.6  | 353.3  | 100.8  | 6.0  | NA          |
| 560110 - 85  | 446  | 5110   | 2.2 | 22.2034 | 10.0 | 0.0979  | 11.0 | 0.0158 | 4.6  | 0.41 | 100.8  | 4.6  | 94.8   | 9.9  | -53.6  | 244.0  | 100.8  | 4.6  | NA          |
| 560110 - 98  | 115  | 3528   | 2.1 | 26.8041 | 78.0 | 0.0819  | 79.3 | 0.0159 | 14.1 | 0.18 | 101.9  | 14.2 | 80.0   | 61.0 | -534.2 | 2495.3 | 101.9  | 14.2 | NA          |
| 560110 - 44  | 245  | 4461   | 2.3 | 21.1333 | 20.2 | 0.1043  | 20.7 | 0.0160 | 4.6  | 0.22 | 102.3  | 4.6  | 100.8  | 19.9 | 65.3   | 485.5  | 102.3  | 4.6  | NA          |
| 560110 - 19  | 339  | 14396  | 2.9 | 20.9651 | 14.1 | 0.1052  | 15.0 | 0.0160 | 5.1  | 0.34 | 102.3  | 5.2  | 101.6  | 14.5 | 84.3   | 336.6  | 102.3  | 5.2  | NA          |
| 560110 - 99  | 571  | 12597  | 2.4 | 22.2230 | 14.6 | 0.0993  | 15.4 | 0.0160 | 4.9  | 0.32 | 102.4  | 4.9  | 96.2   | 14.1 | -55.7  | 356.9  | 102.4  | 4.9  | NA          |
| 560110 - 103 | 361  | 8226   | 3.4 | 24.3045 | 24.9 | 0.0919  | 25.4 | 0.0162 | 5.0  | 0.20 | 103.5  | 5.1  | 89.2   | 21.7 | -278.6 | 642.2  | 103.5  | 5.1  | NA          |
| 560110 - 105 | 424  | 12975  | 2.5 | 20.9818 | 12.9 | 0.1069  | 14.8 | 0.0163 | 7.3  | 0.49 | 104.0  | 7.5  | 103.1  | 14.6 | 82.4   | 308.2  | 104.0  | 7.5  | NA          |
| 560110 - 34  | 591  | 12868  | 2.9 | 20.7206 | 9.8  | 0.1100  | 13.1 | 0.0165 | 8.7  | 0.67 | 105.7  | 9.1  | 106.0  | 13.1 | 112.1  | 230.7  | 105.7  | 9.1  | NA          |
| 560110 - 97  | 1416 | 58476  | 3.3 | 20.7959 | 3.6  | 0.1115  | 6.2  | 0.0168 | 5.0  | 0.81 | 107.6  | 5.3  | 107.4  | 6.3  | 103.5  | 86.0   | 107.6  | 5.3  | NA          |
| 560110 - 104 | 653  | 39400  | 1.3 | 20.4915 | 11.0 | 0.1170  | 12.1 | 0.0174 | 5.1  | 0.42 | 111.2  | 5.6  | 112.4  | 12.9 | 138.3  | 257.9  | 111.2  | 5.6  | NA          |
| 560110 - 5   | 224  | 8029   | 3.7 | 25.2955 | 27.8 |         |      |        |      |      |        |      |        |      |        |        |        |      |             |

|              |      |        |     |         |      |        |      |        |     |      |        |      |        |      |        |       |        |      |       |
|--------------|------|--------|-----|---------|------|--------|------|--------|-----|------|--------|------|--------|------|--------|-------|--------|------|-------|
| RD560308-37  | 878  | 7350   | 1.0 | 21.5090 | 2.5  | 0.0971 | 2.9  | 0.0151 | 1.4 | 0.48 | 96.9   | 1.3  | 94.1   | 2.6  | 23.2   | 60.6  | 96.9   | 1.3  | NA    |
| RD560308-87  | 429  | 4827   | 1.6 | 23.6234 | 4.5  | 0.0884 | 4.7  | 0.0152 | 1.0 | 0.22 | 96.9   | 1.0  | 86.0   | 3.8  | -206.8 | 114.0 | 96.9   | 1.0  | NA    |
| RD560308-49  | 219  | 11409  | 0.9 | 22.3792 | 13.9 | 0.0936 | 14.1 | 0.0152 | 2.1 | 0.15 | 97.2   | 2.0  | 90.9   | 12.2 | -72.8  | 341.3 | 97.2   | 2.0  | NA    |
| RD560308-22  | 204  | 8058   | 1.9 | 19.7839 | 18.2 | 0.1060 | 18.5 | 0.0152 | 3.1 | 0.17 | 97.3   | 3.0  | 102.3  | 18.0 | 220.2  | 424.5 | 97.3   | 3.0  | NA    |
| RD560308-70  | 359  | 5544   | 1.7 | 20.4318 | 7.6  | 0.1027 | 7.9  | 0.0152 | 1.9 | 0.24 | 97.3   | 1.9  | 99.2   | 7.4  | 145.1  | 178.8 | 97.3   | 1.9  | NA    |
| RD560308-27  | 578  | 6402   | 1.3 | 22.0174 | 8.1  | 0.0953 | 8.2  | 0.0152 | 1.5 | 0.18 | 97.4   | 1.4  | 92.5   | 7.3  | -33.1  | 196.0 | 97.4   | 1.4  | NA    |
| RD560308-51  | 356  | 4032   | 1.7 | 22.4187 | 9.6  | 0.0936 | 9.8  | 0.0152 | 1.7 | 0.18 | 97.4   | 1.7  | 90.9   | 8.5  | -77.1  | 235.2 | 97.4   | 1.7  | NA    |
| RD560308-80  | 577  | 5982   | 1.2 | 21.6290 | 6.0  | 0.0971 | 6.1  | 0.0152 | 1.1 | 0.18 | 97.4   | 1.1  | 94.1   | 5.4  | 9.9    | 143.5 | 97.4   | 1.1  | NA    |
| RD560308-33  | 434  | 3993   | 2.6 | 22.2273 | 2.8  | 0.0946 | 3.0  | 0.0152 | 1.2 | 0.39 | 97.6   | 1.1  | 91.8   | 2.6  | -56.2  | 67.0  | 97.6   | 1.1  | NA    |
| RD560308-59  | 440  | 4479   | 1.3 | 21.4242 | 8.1  | 0.0983 | 8.2  | 0.0153 | 1.3 | 0.16 | 97.7   | 1.2  | 95.2   | 7.5  | 32.7   | 195.5 | 97.7   | 1.2  | NA    |
| RD560308-9   | 876  | 8259   | 2.5 | 22.0616 | 3.7  | 0.0954 | 4.2  | 0.0153 | 1.9 | 0.45 | 97.7   | 1.8  | 92.6   | 3.7  | -38.0  | 90.3  | 97.7   | 1.8  | NA    |
| RD560308-77  | 159  | 7458   | 1.4 | 21.2728 | 6.1  | 0.0992 | 6.4  | 0.0153 | 2.0 | 0.32 | 97.9   | 2.0  | 96.1   | 5.9  | 49.7   | 145.9 | 97.9   | 2.0  | NA    |
| RD560308-63  | 136  | 7365   | 1.3 | 21.9256 | 14.2 | 0.0963 | 14.4 | 0.0153 | 2.6 | 0.18 | 98.0   | 2.5  | 93.3   | 12.9 | -23.0  | 345.8 | 98.0   | 2.5  | NA    |
| RD560308-15  | 618  | 6042   | 1.8 | 21.8607 | 4.9  | 0.0967 | 4.9  | 0.0153 | 0.5 | 0.10 | 98.1   | 0.5  | 93.7   | 4.4  | -15.8  | 118.1 | 98.1   | 0.5  | NA    |
| RD560308-81  | 549  | 5997   | 1.4 | 21.0361 | 3.9  | 0.1007 | 4.2  | 0.0154 | 1.5 | 0.36 | 98.3   | 1.5  | 97.4   | 3.9  | 76.3   | 92.7  | 98.3   | 1.5  | NA    |
| RD560308-90  | 172  | 4737   | 1.6 | 21.5504 | 10.5 | 0.0985 | 10.5 | 0.0154 | 0.8 | 0.08 | 98.5   | 0.8  | 95.4   | 9.6  | 18.6   | 253.0 | 98.5   | 0.8  | NA    |
| RD560308-65  | 293  | 3021   | 1.8 | 22.7729 | 10.3 | 0.0935 | 10.3 | 0.0155 | 1.0 | 0.10 | 98.8   | 1.0  | 90.8   | 9.0  | -115.6 | 253.2 | 98.8   | 1.0  | NA    |
| RD560308-12  | 618  | 4992   | 1.6 | 21.9714 | 3.9  | 0.0971 | 4.0  | 0.0155 | 0.7 | 0.17 | 99.0   | 0.7  | 94.1   | 3.6  | -28.0  | 95.6  | 99.0   | 0.7  | NA    |
| RD560308-66  | 324  | 3756   | 1.4 | 22.4557 | 8.9  | 0.0952 | 9.0  | 0.0155 | 1.7 | 0.19 | 99.2   | 1.7  | 92.3   | 8.0  | -81.2  | 217.6 | 99.2   | 1.7  | NA    |
| RD560308-3   | 1224 | 9894   | 3.6 | 21.8690 | 3.0  | 0.0979 | 3.1  | 0.0155 | 0.8 | 0.27 | 99.3   | 0.8  | 94.8   | 2.8  | -16.7  | 71.9  | 99.3   | 0.8  | NA    |
| RD560308-53  | 497  | 4659   | 1.8 | 22.2636 | 4.6  | 0.0962 | 4.6  | 0.0155 | 0.5 | 0.12 | 99.3   | 0.5  | 93.2   | 4.1  | -60.2  | 111.2 | 99.3   | 0.5  | NA    |
| RD560308-25  | 589  | 3090   | 3.9 | 19.6981 | 9.1  | 0.1087 | 9.2  | 0.0155 | 1.2 | 0.13 | 99.3   | 1.2  | 104.8  | 9.1  | 230.2  | 210.2 | 99.3   | 1.2  | NA    |
| RD560308-64  | 260  | 5559   | 2.6 | 22.2853 | 7.2  | 0.0961 | 7.2  | 0.0155 | 0.9 | 0.13 | 99.3   | 0.9  | 93.2   | 6.4  | -62.5  | 174.7 | 99.3   | 0.9  | NA    |
| RD560308-83  | 448  | 3960   | 1.3 | 22.7089 | 5.2  | 0.0943 | 5.5  | 0.0155 | 1.6 | 0.29 | 99.4   | 1.6  | 91.5   | 4.8  | -108.7 | 128.9 | 99.4   | 1.6  | NA    |
| RD560308-89  | 694  | 7422   | 1.8 | 22.3197 | 3.9  | 0.0960 | 4.0  | 0.0155 | 1.0 | 0.25 | 99.4   | 1.0  | 93.0   | 3.6  | -66.3  | 94.9  | 99.4   | 1.0  | NA    |
| RD560308-58  | 398  | 8115   | 0.8 | 20.4790 | 7.6  | 0.1049 | 7.6  | 0.0156 | 0.5 | 0.06 | 99.6   | 0.5  | 101.3  | 7.3  | 139.7  | 178.2 | 99.6   | 0.5  | NA    |
| RD560308-86  | 283  | 5421   | 1.8 | 21.2832 | 9.3  | 0.1010 | 9.5  | 0.0156 | 1.5 | 0.15 | 99.8   | 1.4  | 97.7   | 8.8  | 48.5   | 223.5 | 99.8   | 1.4  | NA    |
| RD560308-43  | 229  | 8340   | 1.9 | 22.1622 | 12.4 | 0.0973 | 12.5 | 0.0156 | 1.6 | 0.13 | 100.1  | 1.6  | 94.3   | 11.2 | -49.0  | 301.5 | 100.1  | 1.6  | NA    |
| RD560308-13  | 1133 | 7236   | 6.1 | 20.3241 | 7.5  | 0.1062 | 7.6  | 0.0157 | 1.2 | 0.16 | 100.2  | 1.2  | 102.5  | 7.4  | 157.5  | 176.7 | 100.2  | 1.2  | NA    |
| RD560308-73  | 373  | 3768   | 1.8 | 21.9009 | 7.3  | 0.0991 | 7.5  | 0.0157 | 1.8 | 0.23 | 100.7  | 1.7  | 96.0   | 6.9  | -20.3  | 176.6 | 100.7  | 1.7  | NA    |
| RD560308-76  | 400  | 3093   | 2.3 | 22.9523 | 7.5  | 0.0946 | 7.7  | 0.0157 | 1.9 | 0.24 | 100.7  | 1.9  | 91.8   | 6.8  | -135.0 | 185.8 | 100.7  | 1.9  | NA    |
| RD560308-21  | 385  | 4836   | 1.9 | 20.8573 | 8.1  | 0.1043 | 8.2  | 0.0158 | 1.1 | 0.13 | 100.9  | 1.1  | 100.7  | 7.8  | 96.6   | 191.9 | 100.9  | 1.1  | NA    |
| RD560308-44  | 374  | 3567   | 2.3 | 20.9732 | 9.8  | 0.1046 | 9.8  | 0.0159 | 1.0 | 0.10 | 101.8  | 1.0  | 101.0  | 9.5  | 83.4   | 232.6 | 101.8  | 1.0  | NA    |
| RD560308-32  | 610  | 5856   | 3.8 | 21.7086 | 4.8  | 0.1013 | 4.9  | 0.0160 | 1.0 | 0.21 | 102.0  | 1.0  | 98.0   | 4.5  | 1.0    | 114.8 | 102.0  | 1.0  | NA    |
| RD560308-84  | 663  | 4110   | 2.7 | 19.9755 | 4.3  | 0.1102 | 4.4  | 0.0160 | 1.0 | 0.24 | 102.2  | 1.1  | 106.2  | 4.4  | 197.9  | 99.4  | 102.2  | 1.1  | NA    |
| RD560308-82  | 524  | 6009   | 2.6 | 21.8898 | 6.0  | 0.1011 | 6.0  | 0.0160 | 1.0 | 0.16 | 102.6  | 1.0  | 97.8   | 5.6  | -19.0  | 144.4 | 102.6  | 1.0  | NA    |
| RD560308-93  | 361  | 4239   | 3.9 | 22.1565 | 5.8  | 0.1001 | 6.0  | 0.0161 | 1.3 | 0.21 | 102.9  | 1.3  | 96.9   | 5.5  | -48.4  | 142.4 | 102.9  | 1.3  | NA    |
| RD560308-10  | 1163 | 8664   | 1.3 | 21.7092 | 3.0  | 0.1027 | 3.0  | 0.0162 | 0.4 | 0.12 | 103.4  | 0.4  | 99.2   | 2.9  | 0.9    | 72.9  | 103.4  | 0.4  | NA    |
| RD560308-79  | 257  | 4017   | 1.6 | 22.0314 | 7.7  | 0.1516 | 7.8  | 0.0242 | 0.6 | 0.08 | 154.3  | 0.9  | 143.3  | 10.4 | -34.7  | 188.3 | 154.3  | 0.9  | NA    |
| RD560308-54  | 443  | 12099  | 3.2 | 19.2172 | 4.7  | 0.2707 | 4.8  | 0.0377 | 1.0 | 0.21 | 238.8  | 2.4  | 243.3  | 10.5 | 287.0  | 108.1 | 238.8  | 2.4  | NA    |
| RD560308-72  | 58   | 7923   | 1.6 | 22.2799 | 30.1 | 0.2373 | 30.2 | 0.0383 | 2.8 | 0.09 | 242.5  | 6.7  | 216.2  | 59.0 | -62.0  | 749.2 | 242.5  | 6.7  | NA    |
| RD560308-68  | 50   | 5091   | 0.5 | 17.9937 | 15.0 | 0.4719 | 15.1 | 0.0616 | 1.4 | 0.09 | 385.2  | 5.0  | 392.5  | 49.1 | 435.4  | 335.9 | 385.2  | 5.0  | NA    |
| RD560308-28  | 313  | 20094  | 1.8 | 16.5713 | 2.9  | 0.8330 | 3.0  | 0.1001 | 0.9 | 0.29 | 615.1  | 5.1  | 615.3  | 13.8 | 616.0  | 61.6  | 615.1  | 5.1  | 99.9  |
| RD560308-74  | 309  | 11682  | 0.9 | 15.8548 | 1.3  | 0.9487 | 1.5  | 0.1091 | 0.6 | 0.41 | 667.4  | 3.8  | 677.4  | 7.3  | 710.7  | 28.5  | 667.4  | 3.8  | 93.9  |
| RD560308-18  | 43   | 5394   | 1.8 | 13.5247 | 3.5  | 1.8083 | 3.6  | 0.1774 | 0.9 | 0.24 | 1052.6 | 8.4  | 1048.5 | 23.7 | 1039.8 | 71.2  | 1039.8 | 71.2 | 101.2 |
| RD560308-62  | 71   | 8484   | 3.6 | 13.4556 | 3.4  | 1.7402 | 3.6  | 0.1698 | 1.0 | 0.28 | 1011.2 | 9.3  | 1023.6 | 23.0 | 1050.1 | 69.2  | 1050.1 | 69.2 | 96.3  |
| RD560308-29  | 65   | 7806   | 2.4 | 13.3931 | 2.8  | 1.8799 | 2.9  | 0.1826 | 0.9 | 0.30 | 1081.2 | 8.6  | 1074.0 | 19.3 | 1059.5 | 56.0  | 1059.5 | 56.0 | 102.0 |
| RD560308-34  | 247  | 23358  | 2.2 | 13.0544 | 1.4  | 2.0030 | 1.6  | 0.1896 | 0.8 | 0.51 | 1119.4 | 8.4  | 1116.5 | 10.9 | 1110.8 | 27.8  | 1110.8 | 27.8 | 100.8 |
| RD560308-75  | 122  | 15195  | 7.6 | 12.7227 | 2.1  | 2.0563 | 2.3  | 0.1897 | 0.9 | 0.40 | 1120.0 | 9.1  | 1134.4 | 15.4 | 1162.0 | 41.0  | 1162.0 | 41.0 | 96.4  |
| RD560308-7   | 119  | 10626  | 3.0 | 12.5615 | 1.7  | 2.2210 | 1.9  | 0.2023 | 0.8 | 0.41 | 1187.9 | 8.4  | 1187.7 | 13.2 | 1187.3 | 34.1  | 1187.3 | 34.1 | 100.0 |
| RD560308-36  | 111  | 11781  | 1.9 | 12.1208 | 1.7  | 2.3695 | 1.7  | 0.2083 | 0.5 | 0.26 | 1219.7 | 5.0  | 1233.4 | 12.2 | 1257.5 | 32.3  | 1257.5 | 32.3 | 97.0  |
| RD560308-26  | 165  | 18177  | 0.6 | 12.0906 | 1.2  | 2.4548 | 1.3  | 0.2153 | 0.5 | 0.42 | 1256.8 | 6.2  | 1258.8 | 9.2  | 1262.3 | 22.7  | 1262.3 | 22.7 | 99.6  |
| RD560308-78  | 50   | 6990   | 0.6 | 11.7349 | 2.0  | 2.6490 | 2.7  | 0.2255 | 1.8 | 0.67 | 1310.6 | 21.2 | 1314.4 | 19.7 | 1320.4 | 38.4  | 1320.4 | 38.4 | 99.3  |
| RD560308-6   | 207  | 28953  | 3.7 | 11.2996 | 1.0  | 2.9332 | 1.1  | 0.2404 | 0.5 | 0.44 | 1388.7 | 6.0  | 1390.5 | 8.3  | 1393.3 | 18.8  | 1393.3 | 18.8 | 99.7  |
| RD560308-17  | 99   | 15315  | 0.9 | 9.9827  | 1.0  | 3.8939 | 1.9  | 0.2819 | 1.6 | 0.84 | 1601.1 | 22.1 | 1612.4 | 15.0 | 1627.3 | 18.7  | 1627.3 | 18.7 | 98.4  |
| RD560308-88  | 157  | 11724  | 2.6 | 9.7866  | 0.7  | 3.9696 | 1.3  | 0.2818 | 1.1 | 0.84 | 1600.2 | 15.2 | 1628.0 | 10.4 | 1664.1 | 13.0  | 1664.1 | 13.0 | 96.2  |
| RD560308-20  | 131  | 28308  | 1.4 | 9.3935  | 1.2  | 4.4820 | 1.5  | 0.3054 | 0.9 | 0.59 | 1717.8 | 13.7 | 1727.6 | 12.7 | 1739.6 | 22.6  | 1739.6 | 22.6 | 98.7  |
| RD560308-47  | 169  | 36183  | 1.4 | 9.2005  | 1.5  | 4.7576 | 1.5  | 0.3175 | 0.5 | 0.31 | 1777.3 | 7.5  | 1777.5 | 12.9 | 1777.6 | 26.6  | 1777.6 | 26.6 | 100.0 |
| RD560308-35  | 187  | 23991  | 1.7 | 9.1975  | 1.2  | 4.7184 | 1.7  | 0.3147 | 1.2 | 0.71 | 1764.0 | 19.0 | 1770.5 | 14.6 | 1778.1 | 22.5  | 1778.1 | 22.5 | 99.2  |
| RD560308-2   | 286  | 53997  | 3.7 | 9.1669  | 1.6  | 4.8526 | 1.6  | 0.3226 | 0.4 | 0.24 | 1802.5 | 6.1  | 1794.1 | 13.6 | 1784.2 | 28.6  | 1784.2 | 28.6 | 101.0 |
| RD560308-100 | 217  | 37020  | 2.6 | 9.1317  | 1.4  | 4.8172 | 1.5  | 0.3190 | 0.8 | 0.49 | 1785.0 | 11.7 | 1787.9 | 13.0 | 1791.2 | 24.6  | 1791.2 | 24.6 | 99.7  |
| RD560308-1   | 1007 | 121653 | 2.7 | 9.1141  | 1.4  | 4.8125 | 1.5  | 0.3181 | 0.6 | 0.37 | 1780.5 | 8.6  | 1787.1 | 12.4 | 1794.7 | 24.9  | 1794.7 | 24.9 | 99.2  |
| RD560308-67  | 157  | 34587  | 1.1 | 9.0928  | 1.2  | 4.8940 | 1.3  | 0.3227 | 0.5 | 0.37 | 1803.1 | 7.4  | 1801.2 | 10.8 | 1799.0 | 21.7  | 1799.0 | 21.7 | 100.2 |
| RD560308-4   | 437  | 78630  | 2.5 | 9.0395  | 1.7  | 4.9472 | 2.0  | 0.3243 | 0.9 | 0.47 | 1810.9 | 14.5 | 1810.4 | 16.5 | 1809.7 | 31.3  | 1809.7 | 31.3 | 100.1 |
| RD560308-16  | 61   | 14055  | 1.4 | 8.8434  | 1.   |        |      |        |     |      |        |      |        |      |        |       |        |      |       |



|             |     |        |      |         |     |         |     |        |     |      |        |       |        |      |        |       |        |      |             |
|-------------|-----|--------|------|---------|-----|---------|-----|--------|-----|------|--------|-------|--------|------|--------|-------|--------|------|-------------|
| BHB0901-48  | 328 | 78582  | 2.3  | 12.0004 | 2.4 | 2.2584  | 5.3 | 0.1966 | 4.8 | 0.90 | 1156.8 | 50.4  | 1199.4 | 37.4 | 1277.0 | 46.2  | 1277.0 | 46.2 | 90.6        |
| BHB0901-72  | 279 | 27207  | 0.9  | 11.9790 | 3.5 | 2.4311  | 3.6 | 0.2112 | 0.6 | 0.17 | 1235.3 | 6.7   | 1251.9 | 25.7 | 1280.4 | 68.6  | 1280.4 | 68.6 | 96.5        |
| BHB0901-94  | 254 | 8835   | 2.0  | 11.9268 | 1.4 | 2.3331  | 1.6 | 0.2018 | 0.8 | 0.48 | 1185.1 | 8.4   | 1222.4 | 11.5 | 1288.9 | 27.5  | 1288.9 | 27.5 | 91.9        |
| BHB0901-64  | 441 | 121044 | 3.1  | 11.5598 | 2.3 | 2.5125  | 2.5 | 0.2106 | 1.1 | 0.45 | 1232.3 | 12.8  | 1275.7 | 18.4 | 1349.5 | 43.6  | 1349.5 | 43.6 | 91.3        |
| BHB0901-95  | 258 | 23112  | 2.8  | 11.3644 | 2.4 | 2.4293  | 3.0 | 0.2002 | 1.8 | 0.61 | 1176.6 | 19.7  | 1251.3 | 21.4 | 1382.3 | 45.2  | 1382.3 | 45.2 | 85.1        |
| BHB0901-67  | 114 | 34257  | 1.0  | 11.1662 | 1.0 | 3.0473  | 1.6 | 0.2468 | 1.2 | 0.77 | 1421.9 | 15.4  | 1419.6 | 12.0 | 1416.1 | 19.0  | 1416.1 | 19.0 | 100.4       |
| BHB0901-57  | 63  | 28482  | 3.1  | 10.9729 | 2.1 | 3.0553  | 2.5 | 0.2431 | 1.4 | 0.56 | 1403.0 | 18.2  | 1421.5 | 19.5 | 1449.4 | 40.1  | 1449.4 | 40.1 | 96.8        |
| BHB0901-1   | 224 | 29646  | 2.5  | 10.9502 | 1.5 | 3.2033  | 1.8 | 0.2544 | 1.0 | 0.54 | 1461.1 | 12.8  | 1458.0 | 13.9 | 1453.3 | 28.8  | 1453.3 | 28.8 | 100.5       |
| BHB0901-25  | 107 | 20151  | 1.7  | 9.9311  | 1.5 | 3.9364  | 2.0 | 0.2835 | 1.4 | 0.68 | 1609.1 | 19.5  | 1621.2 | 16.4 | 1636.9 | 27.7  | 1636.9 | 27.7 | 98.3        |
| BHB0901-36  | 169 | 43467  | 2.5  | 9.8898  | 0.8 | 4.0696  | 1.6 | 0.2919 | 1.4 | 0.88 | 1651.0 | 20.8  | 1648.2 | 13.3 | 1644.7 | 14.5  | 1644.7 | 14.5 | 100.4       |
| BHB0901-75  | 161 | 24273  | 0.5  | 9.7954  | 0.9 | 4.0152  | 1.4 | 0.2853 | 1.1 | 0.78 | 1617.8 | 15.9  | 1637.3 | 11.5 | 1662.4 | 16.2  | 1662.4 | 16.2 | 97.3        |
| BHB0901-35  | 165 | 26376  | 1.0  | 9.7420  | 1.4 | 3.9243  | 1.9 | 0.2773 | 1.2 | 0.65 | 1577.6 | 16.9  | 1618.7 | 15.0 | 1672.5 | 26.1  | 1672.5 | 26.1 | 94.3        |
| BHB0901-61  | 201 | 132768 | 2.4  | 9.6685  | 2.0 | 4.1901  | 2.2 | 0.2938 | 0.8 | 0.36 | 1660.6 | 11.3  | 1672.1 | 17.6 | 1686.5 | 37.1  | 1686.5 | 37.1 | 98.5        |
| BHB0901-77  | 144 | 32022  | 0.9  | 9.6303  | 1.0 | 4.2818  | 1.3 | 0.2991 | 0.8 | 0.61 | 1686.7 | 11.9  | 1689.9 | 10.8 | 1693.8 | 19.2  | 1693.8 | 19.2 | 99.6        |
| BHB0901-99  | 504 | 27603  | 7.3  | 9.6061  | 2.8 | 3.6722  | 3.5 | 0.2558 | 2.1 | 0.59 | 1468.5 | 27.3  | 1565.3 | 28.0 | 1698.5 | 52.2  | 1698.5 | 52.2 | 86.5        |
| BHB0901-22  | 71  | 18582  | 1.4  | 9.5988  | 1.5 | 4.3575  | 1.8 | 0.3034 | 1.1 | 0.61 | 1707.9 | 16.8  | 1704.3 | 15.2 | 1699.9 | 26.9  | 1699.9 | 26.9 | 100.5       |
| BHB0901-73  | 191 | 24303  | 3.9  | 9.5604  | 1.2 | 4.2293  | 1.6 | 0.2933 | 1.1 | 0.66 | 1657.8 | 15.5  | 1679.7 | 13.3 | 1707.2 | 22.5  | 1707.2 | 22.5 | 97.1        |
| BHB0901-51  | 235 | 86565  | 1.1  | 9.5490  | 1.0 | 4.0273  | 4.3 | 0.2789 | 4.2 | 0.97 | 1585.9 | 59.5  | 1639.7 | 35.4 | 1709.4 | 18.2  | 1709.4 | 18.2 | 92.8        |
| BHB0901-82  | 264 | 31797  | 1.3  | 9.4695  | 1.2 | 3.6096  | 1.7 | 0.2479 | 1.2 | 0.72 | 1427.7 | 15.9  | 1551.6 | 13.8 | 1724.8 | 22.2  | 1724.8 | 22.2 | 82.8        |
| BHB0901-41  | 121 | 27501  | 1.3  | 9.4639  | 1.0 | 4.3963  | 1.2 | 0.3018 | 0.6 | 0.54 | 1700.0 | 9.6   | 1711.6 | 9.8  | 1725.9 | 18.4  | 1725.9 | 18.4 | 98.5        |
| BHB0901-3   | 300 | 52302  | 1.5  | 9.3888  | 1.0 | 4.5286  | 1.3 | 0.3084 | 0.8 | 0.60 | 1732.7 | 11.5  | 1736.2 | 10.5 | 1740.5 | 18.5  | 1740.5 | 18.5 | 99.6        |
| BHB0901-65  | 427 | 49701  | 2.7  | 9.3805  | 2.1 | 4.3293  | 2.3 | 0.2945 | 0.8 | 0.35 | 1664.2 | 11.9  | 1699.0 | 18.9 | 1742.1 | 39.2  | 1742.1 | 39.2 | 95.5        |
| BHB0901-76  | 659 | 66270  | 20.6 | 9.1974  | 1.3 | 4.5207  | 1.8 | 0.3016 | 1.2 | 0.70 | 1699.0 | 18.2  | 1734.8 | 14.6 | 1778.2 | 23.0  | 1778.2 | 23.0 | 95.5        |
| BHB0901-56  | 396 | 189099 | 3.5  | 9.1734  | 0.9 | 4.8066  | 0.9 | 0.3198 | 0.4 | 0.43 | 1788.7 | 6.4   | 1786.1 | 7.9  | 1782.9 | 15.5  | 1782.9 | 15.5 | 100.3       |
| BHB0901-90  | 598 | 259107 | 4.6  | 9.1331  | 1.1 | 4.8597  | 2.2 | 0.3219 | 1.9 | 0.86 | 1799.0 | 29.5  | 1795.3 | 18.5 | 1791.0 | 20.6  | 1791.0 | 20.6 | 100.4       |
| BHB0901-38  | 495 | 39237  | 5.3  | 9.1067  | 1.5 | 4.4487  | 2.9 | 0.2938 | 2.5 | 0.85 | 1660.6 | 36.2  | 1721.4 | 24.0 | 1796.2 | 27.3  | 1796.2 | 27.3 | 92.4        |
| BHB0901-44  | 280 | 61389  | 2.9  | 9.1051  | 1.4 | 4.6454  | 4.7 | 0.3068 | 4.5 | 0.96 | 1724.8 | 68.0  | 1757.5 | 39.2 | 1796.5 | 24.6  | 1796.5 | 24.6 | 96.0        |
| BHB0901-58  | 313 | 14325  | 1.2  | 9.0411  | 2.3 | 4.1245  | 3.4 | 0.2705 | 2.5 | 0.73 | 1543.1 | 34.3  | 1659.2 | 27.8 | 1809.4 | 42.0  | 1809.4 | 42.0 | 85.3        |
| BHB0901-15  | 214 | 70053  | 5.7  | 9.0335  | 1.0 | 4.9300  | 1.3 | 0.3230 | 0.9 | 0.69 | 1804.4 | 14.6  | 1807.4 | 11.3 | 1810.9 | 17.6  | 1810.9 | 17.6 | 99.6        |
| BHB0901-24  | 80  | 29355  | 1.8  | 8.9631  | 1.4 | 5.0379  | 1.8 | 0.3275 | 1.1 | 0.62 | 1826.2 | 17.3  | 1825.7 | 15.0 | 1825.1 | 25.2  | 1825.1 | 25.2 | 100.1       |
| BHB0901-19  | 47  | 19509  | 2.9  | 8.9527  | 1.1 | 4.9631  | 2.9 | 0.3223 | 2.7 | 0.93 | 1800.7 | 42.3  | 1813.1 | 24.5 | 1827.2 | 19.7  | 1827.2 | 19.7 | 98.6        |
| BHB0901-17  | 188 | 37563  | 4.7  | 8.9492  | 0.9 | 4.3670  | 1.9 | 0.2834 | 1.6 | 0.87 | 1608.7 | 23.1  | 1706.1 | 15.4 | 1827.9 | 16.9  | 1827.9 | 16.9 | 88.0        |
| BHB0901-23  | 598 | 14565  | 3.5  | 8.8759  | 1.8 | 4.9008  | 3.4 | 0.3155 | 2.9 | 0.86 | 1767.7 | 45.5  | 1802.4 | 29.0 | 1842.8 | 32.1  | 1842.8 | 32.1 | 95.9        |
| BHB0901-85  | 559 | 89934  | 2.4  | 8.8592  | 2.6 | 4.5880  | 3.0 | 0.2948 | 1.4 | 0.47 | 1665.4 | 20.8  | 1747.1 | 25.0 | 1846.2 | 47.8  | 1846.2 | 47.8 | 90.2        |
| BHB0901-78  | 137 | 46245  | 0.7  | 8.7314  | 1.7 | 5.1117  | 1.9 | 0.3237 | 0.8 | 0.43 | 1807.8 | 12.9  | 1838.1 | 16.3 | 1872.5 | 31.2  | 1872.5 | 31.2 | 96.5        |
| BHB0901-71  | 103 | 38451  | 0.7  | 8.6224  | 0.6 | 5.3100  | 1.5 | 0.3321 | 1.3 | 0.91 | 1848.4 | 21.2  | 1870.5 | 12.4 | 1895.1 | 10.8  | 1895.1 | 10.8 | 97.5        |
| BHB0901-49  | 184 | 25926  | 1.8  | 8.6105  | 1.9 | 5.2974  | 2.0 | 0.3308 | 0.7 | 0.33 | 1842.4 | 10.7  | 1868.5 | 17.3 | 1897.6 | 34.4  | 1897.6 | 34.4 | 97.1        |
| BHB0901-14  | 344 | 89184  | 2.6  | 8.6005  | 0.9 | 5.4737  | 1.6 | 0.3414 | 1.4 | 0.84 | 1893.5 | 22.6  | 1896.5 | 14.1 | 1899.7 | 16.2  | 1899.7 | 16.2 | 99.7        |
| BHB0901-34  | 421 | 32571  | 2.4  | 8.5183  | 1.1 | 4.9033  | 1.3 | 0.3029 | 0.8 | 0.61 | 1705.8 | 12.1  | 1802.8 | 11.3 | 1916.9 | 19.0  | 1916.9 | 19.0 | 89.0        |
| BHB0901-45  | 149 | 58422  | 2.1  | 8.3322  | 0.7 | 5.7064  | 1.6 | 0.3448 | 1.5 | 0.91 | 1909.9 | 24.3  | 1932.3 | 14.0 | 1956.5 | 12.0  | 1956.5 | 12.0 | 97.6        |
| BHB0901-89  | 179 | 65415  | 1.8  | 8.2997  | 1.0 | 5.4309  | 3.0 | 0.3269 | 2.8 | 0.95 | 1823.4 | 44.5  | 1889.7 | 25.4 | 1963.4 | 17.0  | 1963.4 | 17.0 | 92.9        |
| BHB0901-28  | 230 | 15573  | 0.6  | 8.2876  | 1.3 | 5.7792  | 1.6 | 0.3474 | 0.9 | 0.58 | 1922.1 | 15.5  | 1943.3 | 14.0 | 1966.0 | 23.5  | 1966.0 | 23.5 | 97.8        |
| BHB0901-91  | 47  | 49599  | 1.2  | 7.8927  | 1.8 | 6.4287  | 2.0 | 0.3680 | 0.8 | 0.41 | 2020.0 | 14.2  | 2036.2 | 17.6 | 2052.6 | 32.2  | 2052.6 | 32.2 | 98.4        |
| BHB0901-40  | 114 | 12303  | 1.2  | 7.6716  | 1.3 | 5.7400  | 4.1 | 0.3194 | 3.9 | 0.95 | 1786.6 | 61.2  | 1937.4 | 35.8 | 2102.7 | 23.3  | 2102.7 | 23.3 | 85.0        |
| BHB0901-37  | 284 | 26973  | 3.3  | 7.4874  | 1.4 | 5.2930  | 7.7 | 0.2874 | 7.6 | 0.98 | 1628.7 | 109.1 | 1867.7 | 65.8 | 2145.3 | 23.6  | 2145.3 | 23.6 | 75.9        |
| BHB0901-79  | 177 | 172479 | 3.7  | 7.1049  | 1.1 | 7.9402  | 2.5 | 0.4092 | 2.3 | 0.90 | 2211.0 | 42.5  | 2224.3 | 22.7 | 2236.4 | 18.9  | 2236.4 | 18.9 | 98.9        |
| BHB0901-46  | 216 | 31881  | 1.8  | 6.6068  | 1.0 | 7.1204  | 3.9 | 0.3412 | 3.7 | 0.97 | 1892.4 | 61.2  | 2126.6 | 34.3 | 2361.3 | 16.4  | 2361.3 | 16.4 | 80.1        |
| BHB0901-74  | 199 | 145863 | 3.2  | 6.3362  | 3.3 | 9.9610  | 3.7 | 0.4578 | 1.8 | 0.49 | 2429.6 | 36.8  | 2431.2 | 34.4 | 2432.4 | 55.1  | 2432.4 | 55.1 | 99.9        |
| BHB0901-4   | 90  | 27612  | 1.6  | 6.1214  | 1.0 | 10.0878 | 2.3 | 0.4479 | 2.1 | 0.90 | 2385.7 | 41.7  | 2442.9 | 21.5 | 2490.7 | 17.2  | 2490.7 | 17.2 | 95.8        |
| BHB0901-6   | 43  | 18522  | 0.6  | 5.6457  | 0.9 | 12.1686 | 1.0 | 0.4983 | 0.5 | 0.48 | 2606.3 | 10.3  | 2617.5 | 9.4  | 2626.1 | 14.7  | 2626.1 | 14.7 | 99.2        |
| BHB0901-63  | 113 | 102969 | 1.7  | 5.4877  | 0.8 | 12.8906 | 1.3 | 0.5131 | 1.1 | 0.80 | 2669.7 | 23.2  | 2671.7 | 12.5 | 2673.2 | 13.1  | 2673.2 | 13.1 | 99.9        |
| BHB0901-86  | 200 | 185784 | 1.0  | 5.4653  | 0.7 | 12.9623 | 1.5 | 0.5138 | 1.3 | 0.89 | 2672.8 | 28.7  | 2676.9 | 13.9 | 2680.0 | 11.2  | 2680.0 | 11.2 | 99.7        |
| BHB0901-93  | 166 | 116901 | 1.6  | 5.4557  | 1.1 | 12.7124 | 2.5 | 0.5030 | 2.3 | 0.90 | 2626.7 | 49.4  | 2658.6 | 24.0 | 2682.9 | 18.5  | 2682.9 | 18.5 | 97.9        |
| BHB0901-55  | 21  | 105267 | 0.8  | 5.4165  | 0.8 | 13.1788 | 1.3 | 0.5177 | 0.9 | 0.75 | 2689.5 | 20.7  | 2692.5 | 11.8 | 2694.8 | 13.7  | 2694.8 | 13.7 | 99.8        |
| BHB0901-27  | 173 | 59115  | 2.2  | 5.0425  | 0.8 | 14.2863 | 2.2 | 0.5225 | 2.1 | 0.93 | 2709.7 | 45.4  | 2768.9 | 20.8 | 2812.3 | 12.7  | 2812.3 | 12.7 | 96.3        |
| BHB0901-2   | 88  | 42156  | 1.0  | 5.0186  | 1.2 | 14.9449 | 1.8 | 0.5440 | 1.4 | 0.77 | 2800.0 | 31.6  | 2811.7 | 17.2 | 2820.1 | 18.8  | 2820.1 | 18.8 | 99.3        |
| BHB0901-33  | 30  | 16278  | 0.9  | 4.8900  | 1.1 | 15.5099 | 2.3 | 0.5501 | 2.0 | 0.88 | 2825.5 | 45.5  | 2847.1 | 21.6 | 2862.4 | 17.6  | 2862.4 | 17.6 | 98.7        |
| BHB0901-81  | 302 | 90954  | 2.0  | 4.0273  | 1.1 | 19.9720 | 1.4 | 0.5834 | 1.0 | 0.69 | 2962.4 | 23.5  | 3090.0 | 14.0 | 3174.0 | 16.6  | 3174.0 | 16.6 | 93.3        |
| BHB0902-75  | 467 | 5408   | 2.1  | 21.2148 | 4.5 | 0.0939  | 4.9 | 0.0145 | 1.9 | 0.39 | 92.5   | 1.8   | 91.1   | 4.3  | 56.2   | 107.3 | 92.5   | 1.8  | NA 1.3, 0.8 |
| BHB0902-62  | 520 | 4704   | 1.2  | 21.7976 | 3.2 | 0.0921  | 3.3 | 0.0146 | 1.0 | 0.31 | 93.2   | 1.0   | 89.5   | 2.9  | -8.8   | 76.5  | 93.2   | 1.0  | NA          |
| BHB0902-100 | 571 | 8438   | 3.5  | 21.8322 | 2.8 | 0.0923  | 2.9 | 0.0146 | 0.8 | 0.26 | 93.5   | 0.7   | 89.6   | 2.5  | -12.7  | 67.3  | 93.5   | 0.7  | NA          |
| BHB0902-72  | 710 | 4256   | 2.0  | 22.4270 | 2.4 | 0.0900  | 2.7 | 0.0146 | 1.1 | 0.42 | 93.7   | 1.0   | 87.5   | 2.2  | -78.0  | 59.6  | 93.7   | 1.0  | NA          |
| BHB0902-89  | 272 | 2685   | 2.2  | 21.3653 | 6.7 | 0.0950  | 6.8 | 0.0147 | 0.9 | 0.14 | 94.2</ |       |        |      |        |       |        |      |             |

|             |      |       |       |         |      |         |      |        |     |      |        |       |        |      |        |       |        |      |             |
|-------------|------|-------|-------|---------|------|---------|------|--------|-----|------|--------|-------|--------|------|--------|-------|--------|------|-------------|
| BHB0902-20  | 215  | 32159 | 4.2   | 10.3076 | 1.1  | 3.5876  | 1.3  | 0.2682 | 0.7 | 0.55 | 1531.7 | 10.0  | 1546.8 | 10.6 | 1567.5 | 21.0  | 1567.5 | 21.0 | 97.7        |
| BHB0902-44  | 184  | 30402 | 3.2   | 10.1702 | 1.2  | 3.7066  | 1.4  | 0.2734 | 0.7 | 0.48 | 1558.1 | 9.1   | 1572.8 | 11.0 | 1592.6 | 22.5  | 1592.6 | 22.5 | 97.8        |
| BHB0902-22  | 172  | 15791 | 1.0   | 9.9047  | 1.1  | 3.6376  | 3.1  | 0.2613 | 2.9 | 0.93 | 1496.5 | 38.3  | 1557.8 | 24.6 | 1641.9 | 21.2  | 1641.9 | 21.2 | 91.1        |
| BHB0902-74  | 241  | 47667 | 4.6   | 9.5747  | 0.7  | 4.1929  | 1.1  | 0.2912 | 0.9 | 0.78 | 1647.4 | 12.8  | 1672.6 | 9.2  | 1704.5 | 12.9  | 1704.5 | 12.9 | 96.6        |
| BHB0902-43  | 158  | 27006 | 3.7   | 9.4702  | 0.8  | 4.4872  | 1.5  | 0.3082 | 1.2 | 0.84 | 1731.9 | 18.8  | 1728.6 | 12.3 | 1724.7 | 14.8  | 1724.7 | 14.8 | 100.4       |
| BHB0902-16  | 91   | 9614  | 0.8   | 9.4101  | 1.4  | 4.4856  | 2.2  | 0.3061 | 1.7 | 0.76 | 1721.7 | 25.4  | 1728.3 | 18.3 | 1736.4 | 26.3  | 1736.4 | 26.3 | 99.2        |
| BHB0902-4   | 729  | 20805 | 1.3   | 9.2140  | 1.0  | 3.9129  | 1.4  | 0.2615 | 0.9 | 0.66 | 1497.4 | 11.9  | 1616.4 | 11.0 | 1774.9 | 18.6  | 1774.9 | 18.6 | 84.4        |
| BHB0902-49  | 787  | 42195 | 2.0   | 9.1690  | 0.8  | 4.7280  | 1.1  | 0.3144 | 0.8 | 0.74 | 1762.4 | 12.6  | 1772.2 | 9.3  | 1783.8 | 13.7  | 1783.8 | 13.7 | 98.8        |
| BHB0902-41  | 480  | 55932 | 4.2   | 9.1425  | 0.9  | 4.7023  | 2.0  | 0.3118 | 1.8 | 0.90 | 1749.6 | 27.3  | 1767.6 | 16.5 | 1789.1 | 15.5  | 1789.1 | 15.5 | 97.8        |
| BHB0902-38  | 140  | 22539 | 2.2   | 9.1160  | 1.0  | 4.7581  | 1.5  | 0.3146 | 1.2 | 0.75 | 1763.2 | 17.9  | 1777.5 | 12.9 | 1794.4 | 18.4  | 1794.4 | 18.4 | 98.3        |
| BHB0902-82  | 390  | 70131 | 3.2   | 9.1136  | 1.6  | 4.7049  | 2.5  | 0.3110 | 1.9 | 0.76 | 1745.6 | 28.6  | 1768.1 | 20.7 | 1794.8 | 29.5  | 1794.8 | 29.5 | 97.3        |
| BHB0902-29  | 517  | 30243 | 2.5   | 9.1026  | 1.3  | 4.5250  | 4.7  | 0.2987 | 4.5 | 0.96 | 1685.0 | 67.2  | 1735.6 | 39.2 | 1797.1 | 23.2  | 1797.1 | 23.2 | 93.8        |
| BHB0902-85  | 240  | 18137 | 2.9   | 9.0990  | 1.1  | 4.7186  | 1.5  | 0.3114 | 1.0 | 0.66 | 1747.6 | 15.2  | 1770.6 | 12.6 | 1797.8 | 20.5  | 1797.8 | 20.5 | 97.2        |
| BHB0902-73  | 679  | 42023 | 3.0   | 9.0948  | 0.9  | 4.5054  | 2.0  | 0.2972 | 1.8 | 0.88 | 1677.3 | 25.8  | 1732.0 | 16.5 | 1798.6 | 17.1  | 1798.6 | 17.1 | 93.3        |
| BHB0902-13  | 306  | 28352 | 4.6   | 9.0940  | 1.0  | 4.7633  | 1.6  | 0.3142 | 1.2 | 0.76 | 1761.2 | 18.2  | 1778.5 | 13.1 | 1798.8 | 18.5  | 1798.8 | 18.5 | 97.9        |
| BHB0902-66  | 250  | 36981 | 2.6   | 9.0538  | 0.7  | 4.6636  | 1.6  | 0.3062 | 1.5 | 0.90 | 1722.2 | 22.5  | 1760.7 | 13.8 | 1806.8 | 12.7  | 1806.8 | 12.7 | 95.3        |
| BHB0902-11  | 594  | 12555 | 3.3   | 9.0412  | 0.8  | 4.6271  | 2.3  | 0.3034 | 2.1 | 0.94 | 1708.2 | 32.0  | 1754.2 | 18.9 | 1809.3 | 13.9  | 1809.3 | 13.9 | 94.4        |
| BHB0902-42  | 201  | 32754 | 4.3   | 9.0042  | 0.8  | 4.9334  | 1.4  | 0.3222 | 1.2 | 0.83 | 1800.3 | 18.8  | 1808.0 | 12.2 | 1816.8 | 14.5  | 1816.8 | 14.5 | 99.1        |
| BHB0902-10  | 335  | 18324 | 2.9   | 8.9709  | 1.6  | 4.7755  | 4.0  | 0.3107 | 3.7 | 0.92 | 1744.2 | 55.9  | 1780.6 | 33.5 | 1823.5 | 29.0  | 1823.5 | 29.0 | 95.6        |
| BHB0902-69  | 523  | 55962 | 4.5   | 8.9549  | 1.6  | 4.7869  | 3.3  | 0.3109 | 2.9 | 0.88 | 1745.1 | 44.0  | 1782.6 | 27.5 | 1826.8 | 28.3  | 1826.8 | 28.3 | 95.5        |
| BHB0902-24  | 49   | 9452  | 4.2   | 8.9054  | 2.6  | 4.6206  | 6.4  | 0.2984 | 5.8 | 0.91 | 1683.5 | 86.2  | 1753.0 | 53.4 | 1836.8 | 47.8  | 1836.8 | 47.8 | 91.7        |
| BHB0902-15  | 101  | 19925 | 2.5   | 8.8274  | 0.7  | 5.0594  | 1.3  | 0.3239 | 1.2 | 0.87 | 1808.8 | 18.1  | 1829.3 | 11.2 | 1852.7 | 11.9  | 1852.7 | 11.9 | 97.6        |
| BHB0902-55  | 249  | 49595 | 4.2   | 8.7528  | 0.9  | 5.3287  | 1.3  | 0.3383 | 1.0 | 0.77 | 1878.4 | 16.8  | 1873.5 | 11.5 | 1868.0 | 15.5  | 1868.0 | 15.5 | 100.6       |
| BHB0902-88  | 491  | 25538 | 7.0   | 8.5123  | 1.3  | 5.2152  | 1.6  | 0.3220 | 1.0 | 0.60 | 1799.4 | 15.2  | 1855.1 | 13.8 | 1918.2 | 23.1  | 1918.2 | 23.1 | 93.8        |
| BHB0902-76  | 61   | 11997 | 6.1   | 8.4834  | 1.0  | 5.5609  | 1.5  | 0.3421 | 1.2 | 0.77 | 1897.0 | 19.1  | 1910.1 | 12.9 | 1924.3 | 17.0  | 1924.3 | 17.0 | 98.6        |
| BHB0902-60  | 129  | 27305 | 3.7   | 8.1041  | 1.2  | 6.1735  | 1.6  | 0.3629 | 1.1 | 0.69 | 1995.7 | 19.4  | 2000.7 | 14.4 | 2005.9 | 21.2  | 2005.9 | 21.2 | 99.5        |
| BHB0902-5   | 133  | 13422 | 1.9   | 7.8060  | 0.9  | 6.4627  | 2.4  | 0.3659 | 2.2 | 0.93 | 2010.0 | 37.8  | 2040.8 | 20.8 | 2072.1 | 15.7  | 2072.1 | 15.7 | 97.0        |
| BHB0902-78  | 150  | 15353 | 2.1   | 7.8037  | 1.1  | 5.8157  | 1.5  | 0.3292 | 1.1 | 0.72 | 1834.3 | 17.7  | 1948.7 | 13.4 | 2072.7 | 18.8  | 2072.7 | 18.8 | 88.5        |
| BHB0902-31  | 276  | 16481 | 3.8   | 7.6914  | 1.0  | 5.3653  | 2.7  | 0.2993 | 2.5 | 0.93 | 1687.8 | 37.3  | 1879.3 | 23.1 | 2098.2 | 17.2  | 2098.2 | 17.2 | 80.4        |
| BHB0902-6   | 124  | 22337 | 1.7   | 7.0229  | 0.9  | 8.0799  | 1.3  | 0.4115 | 0.9 | 0.71 | 2222.0 | 17.5  | 2240.0 | 11.8 | 2256.5 | 15.9  | 2256.5 | 15.9 | 98.5        |
| BHB0902-50  | 156  | 24377 | 3.1   | 6.4317  | 0.6  | 9.1355  | 2.8  | 0.4261 | 2.7 | 0.97 | 2288.3 | 51.6  | 2351.7 | 25.2 | 2407.1 | 10.6  | 2407.1 | 10.6 | 95.1        |
| BHB0902-25  | 188  | 53835 | 3.7   | 6.2460  | 1.0  | 10.3423 | 1.5  | 0.4685 | 1.1 | 0.73 | 2477.0 | 22.4  | 2465.9 | 13.9 | 2456.7 | 17.4  | 2456.7 | 17.4 | 100.8       |
| BHB0902-71  | 157  | 38711 | 1.9   | 5.6660  | 0.7  | 11.7442 | 1.0  | 0.4826 | 0.8 | 0.75 | 2538.6 | 15.7  | 2584.2 | 9.4  | 2620.2 | 11.2  | 2620.2 | 11.2 | 96.9        |
| BHB0902-52  | 46   | 13763 | 0.9   | 4.8350  | 0.7  | 15.9635 | 1.5  | 0.5598 | 1.4 | 0.90 | 2865.7 | 32.2  | 2874.6 | 14.8 | 2880.8 | 10.9  | 2880.8 | 10.9 | 99.5        |
| BHB0902-87  | 249  | 23729 | 5.2   | 4.7293  | 1.5  | 14.0837 | 5.4  | 0.4831 | 5.2 | 0.96 | 2540.6 | 109.0 | 2755.4 | 51.2 | 2916.7 | 24.0  | 2916.7 | 24.0 | 87.1        |
| BHB0903-6   | 1012 | 23766 | 12.3  | 18.6969 | 13.4 | 0.1030  | 16.5 | 0.0140 | 9.6 | 0.58 | 89.4   | 8.5   | 99.5   | 15.6 | 349.4  | 303.7 | 89.4   | 8.5  | NA 1.3, 0.9 |
| BHB0903-43  | 401  | 11778 | 41.2  | 21.2429 | 3.4  | 0.0947  | 5.8  | 0.0146 | 4.7 | 0.81 | 93.4   | 4.4   | 91.9   | 5.1  | 53.0   | 80.0  | 93.4   | 4.4  | NA          |
| BHB0903-16  | 453  | 9846  | 2.3   | 21.3819 | 3.4  | 0.0947  | 3.7  | 0.0147 | 1.5 | 0.39 | 93.9   | 1.4   | 91.8   | 3.2  | 37.4   | 80.9  | 93.9   | 1.4  | NA          |
| BHB0903-99  | 502  | 13563 | 232.1 | 21.7191 | 2.7  | 0.0933  | 4.1  | 0.0147 | 3.1 | 0.75 | 94.1   | 2.9   | 90.6   | 3.5  | -0.1   | 64.4  | 94.1   | 2.9  | NA          |
| BHB0903-81  | 257  | 6372  | 2.0   | 20.1569 | 5.9  | 0.1020  | 6.0  | 0.0149 | 1.3 | 0.22 | 95.4   | 1.2   | 98.6   | 5.7  | 176.8  | 137.1 | 95.4   | 1.2  | NA          |
| BHB0903-100 | 2019 | 38559 | 11.8  | 20.9565 | 0.9  | 0.0981  | 1.3  | 0.0149 | 1.0 | 0.73 | 95.4   | 0.9   | 95.0   | 1.2  | 85.3   | 21.7  | 95.4   | 0.9  | NA          |
| BHB0903-51  | 1008 | 21315 | 6.7   | 20.9969 | 2.4  | 0.0982  | 3.1  | 0.0149 | 2.0 | 0.64 | 95.6   | 1.9   | 95.1   | 2.8  | 80.7   | 57.2  | 95.6   | 1.9  | NA          |
| BHB0903-32  | 515  | 15174 | 30.5  | 21.4811 | 2.6  | 0.0960  | 3.0  | 0.0150 | 1.6 | 0.51 | 95.7   | 1.5   | 93.0   | 2.7  | 26.3   | 62.7  | 95.7   | 1.5  | NA          |
| BHB0903-9   | 870  | 18006 | 12.5  | 20.7836 | 3.0  | 0.0994  | 3.2  | 0.0150 | 1.2 | 0.36 | 95.9   | 1.1   | 96.2   | 3.0  | 104.9  | 71.0  | 95.9   | 1.1  | NA          |
| BHB0903-38  | 324  | 7248  | 59.2  | 21.2384 | 4.7  | 0.0974  | 8.7  | 0.0150 | 7.3 | 0.84 | 96.0   | 7.0   | 94.4   | 7.8  | 53.5   | 111.6 | 96.0   | 7.0  | NA          |
| BHB0903-90  | 2474 | 39636 | 9.9   | 20.8977 | 3.8  | 0.0991  | 3.9  | 0.0150 | 0.8 | 0.19 | 96.1   | 0.7   | 95.9   | 3.6  | 92.0   | 91.0  | 96.1   | 0.7  | NA          |
| BHB0903-69  | 255  | 6783  | 3.1   | 23.9485 | 6.3  | 0.0868  | 6.4  | 0.0151 | 1.4 | 0.22 | 96.4   | 1.3   | 84.5   | 5.2  | -241.2 | 158.5 | 96.4   | 1.3  | NA          |
| BHB0903-75  | 451  | 12420 | 41.0  | 21.0265 | 8.9  | 0.0988  | 9.6  | 0.0151 | 3.6 | 0.38 | 96.4   | 3.4   | 95.7   | 8.7  | 77.4   | 210.6 | 96.4   | 3.4  | NA          |
| BHB0903-98  | 1176 | 21546 | 8.1   | 21.5957 | 1.1  | 0.0962  | 1.9  | 0.0151 | 1.5 | 0.81 | 96.5   | 1.5   | 93.3   | 1.7  | 13.6   | 26.0  | 96.5   | 1.5  | NA          |
| BHB0903-57  | 1178 | 23178 | 9.2   | 21.8752 | 2.1  | 0.0952  | 2.7  | 0.0151 | 1.7 | 0.61 | 96.7   | 1.6   | 92.4   | 2.4  | -17.4  | 51.9  | 96.7   | 1.6  | NA          |
| BHB0903-7   | 1096 | 21165 | 6.5   | 21.1180 | 1.4  | 0.0987  | 1.8  | 0.0151 | 1.1 | 0.64 | 96.7   | 1.1   | 95.6   | 1.6  | 67.0   | 32.7  | 96.7   | 1.1  | NA          |
| BHB0903-71  | 524  | 15576 | 3.7   | 21.3828 | 2.6  | 0.0976  | 2.9  | 0.0151 | 1.3 | 0.44 | 96.8   | 1.2   | 94.5   | 2.6  | 37.3   | 62.8  | 96.8   | 1.2  | NA          |
| BHB0903-40  | 1213 | 34074 | 23.5  | 21.2359 | 2.4  | 0.0983  | 2.7  | 0.0151 | 1.1 | 0.41 | 96.9   | 1.0   | 95.2   | 2.4  | 53.8   | 57.8  | 96.9   | 1.0  | NA          |
| BHB0903-2   | 1035 | 20301 | 5.2   | 20.9948 | 1.1  | 0.0998  | 1.7  | 0.0152 | 1.3 | 0.78 | 97.2   | 1.3   | 96.6   | 1.6  | 80.9   | 25.7  | 97.2   | 1.3  | NA          |
| BHB0903-14  | 1199 | 19971 | 18.3  | 20.9185 | 1.8  | 0.1002  | 2.6  | 0.0152 | 2.0 | 0.75 | 97.3   | 1.9   | 97.0   | 2.4  | 89.6   | 41.6  | 97.3   | 1.9  | NA          |
| BHB0903-53  | 370  | 5517  | 2.3   | 21.8934 | 3.8  | 0.0959  | 3.9  | 0.0152 | 0.8 | 0.19 | 97.4   | 0.7   | 93.0   | 3.4  | -19.4  | 91.4  | 97.4   | 0.7  | NA          |
| BHB0903-46  | 955  | 13575 | 2.0   | 20.8343 | 2.2  | 0.1015  | 2.8  | 0.0153 | 1.8 | 0.64 | 98.1   | 1.8   | 98.2   | 2.7  | 99.2   | 51.4  | 98.1   | 1.8  | NA          |
| BHB0903-63  | 834  | 14679 | 10.4  | 21.3105 | 2.9  | 0.0994  | 2.9  | 0.0154 | 0.7 | 0.23 | 98.3   | 0.7   | 96.2   | 2.7  | 45.4   | 68.4  | 98.3   | 0.7  | NA          |
| BHB0903-49  | 248  | 5934  | 3.2   | 21.3844 | 5.5  | 0.0992  | 5.7  | 0.0154 | 1.4 | 0.24 | 98.4   | 1.3   | 96.0   | 5.2  | 37.1   | 132.9 | 98.4   | 1.3  | NA          |
| BHB0903-58  | 357  | 4872  | 1.8   | 21.0625 | 4.0  | 0.1007  | 4.7  | 0.0154 | 2.5 | 0.52 | 98.4   | 2.4   | 97.5   | 4.4  | 73.3   | 96.0  | 98.4   | 2.4  | NA          |
| BHB0903-5   | 244  | 6546  | 58.6  | 20.5112 | 7.0  | 0.1043  | 7.1  | 0.0155 | 1.0 | 0.15 | 99.2   | 1.0   | 100.7  | 6.8  | 136.0  | 165.0 | 99.2   | 1.0  | NA          |
| BHB0903-59  | 968  | 21762 | 18.1  | 20.8794 | 1.3  | 0.1026  | 1.8  | 0.0155 | 1.2 | 0.68 | 99.4   | 1.2   | 99.2   | 1.7  | 94.1   | 31.3  | 99.4   | 1.2  | NA          |
| BHB0903-72  | 723  | 14067 | 10.6  | 20.7490 | 2.4  | 0.1038  | 3.1  | 0.0156 | 2.1 | 0.66 | 99.9   | 2.1   | 100.3  | 3.0  | 108.9  | 55.7  | 99.9   | 2.1  | NA          |
| BHB0903-83  | 380  | 5649  | 2.7   | 20.8782 | 8.4  | 0.1033  | 8.6  | 0.0156 | 1.7 | 0.20 | 100.0  | 1.7   | 99.8   | 8.1  | 94.2   | 199.1 | 100.0  | 1.7  | NA          |
| BHB0903-52  | 581  |       |       |         |      |         |      |        |     |      |        |       |        |      |        |       |        |      |             |



|             |      |        |     |         |      |         |      |        |     |      |        |      |        |      |        |        |        |       |             |
|-------------|------|--------|-----|---------|------|---------|------|--------|-----|------|--------|------|--------|------|--------|--------|--------|-------|-------------|
| BHB0903-26  | 210  | 136266 | 2.1 | 3.7808  | 1.6  | 23.1170 | 2.7  | 0.6339 | 2.2 | 0.81 | 3165.0 | 54.0 | 3231.9 | 26.1 | 3273.7 | 24.8   | 3273.7 | 24.8  | 96.7        |
| BHB0903-66  | 135  | 116988 | 3.6 | 3.7525  | 2.0  | 23.4522 | 2.4  | 0.6383 | 1.4 | 0.56 | 3182.2 | 34.4 | 3245.9 | 23.7 | 3285.5 | 31.6   | 3285.5 | 31.6  | 96.9        |
| BHB0903-22  | 345  | 194790 | 1.1 | 3.6612  | 0.8  | 25.0129 | 1.3  | 0.6642 | 1.1 | 0.82 | 3283.4 | 28.0 | 3308.7 | 13.0 | 3324.1 | 11.9   | 3324.1 | 11.9  | 98.8        |
| BHB0903-36  | 282  | 225507 | 4.2 | 3.6594  | 3.1  | 24.7708 | 3.5  | 0.6574 | 1.5 | 0.43 | 3257.1 | 37.8 | 3299.2 | 33.8 | 3324.9 | 49.0   | 3324.9 | 49.0  | 98.0        |
| BHB0903-20  | 178  | 133386 | 8.8 | 3.6516  | 1.0  | 24.8239 | 2.2  | 0.6574 | 1.9 | 0.90 | 3257.2 | 49.6 | 3301.3 | 21.1 | 3328.2 | 14.9   | 3328.2 | 14.9  | 97.9        |
| BHB0903-28  | 243  | 167400 | 6.8 | 3.6009  | 1.5  | 24.1792 | 1.8  | 0.6315 | 1.0 | 0.57 | 3155.4 | 25.7 | 3275.6 | 17.7 | 3350.1 | 23.4   | 3350.1 | 23.4  | 94.2        |
| BHB0903-55  | 341  | 194475 | 2.0 | 3.5636  | 1.0  | 26.5494 | 1.5  | 0.6862 | 1.1 | 0.74 | 3368.1 | 29.6 | 3367.0 | 14.9 | 3366.3 | 15.9   | 3366.3 | 15.9  | 100.1       |
| BHB0903-45  | 141  | 129105 | 4.0 | 3.4125  | 2.2  | 27.5636 | 3.2  | 0.6822 | 2.3 | 0.73 | 3352.7 | 61.2 | 3403.7 | 31.4 | 3433.8 | 34.0   | 3433.8 | 34.0  | 97.6        |
| BHB0903-21  | 975  | 343380 | 4.8 | 3.3202  | 9.0  | 26.1135 | 9.8  | 0.6288 | 3.9 | 0.40 | 3144.9 | 98.1 | 3350.8 | 96.5 | 3476.3 | 140.0  | 3476.3 | 140.0 | 90.5        |
|             |      |        |     |         |      |         |      |        |     |      |        |      |        |      |        |        |        |       |             |
| SRC0210-66  | 169  | 3867   | 2.9 | 21.4508 | 19.8 | 0.0924  | 20.3 | 0.0144 | 4.6 | 0.23 | 92.0   | 4.2  | 89.7   | 17.4 | 29.7   | 477.4  | 92.0   | 4.2   | NA 1.5, 1.0 |
| SRC0210-71  | 365  | 8952   | 2.7 | 20.4262 | 13.1 | 0.0977  | 13.2 | 0.0145 | 2.1 | 0.16 | 92.6   | 1.9  | 94.7   | 12.0 | 145.8  | 307.6  | 92.6   | 1.9   | NA          |
| SRC0210-39  | 879  | 26490  | 2.6 | 20.5426 | 4.6  | 0.0973  | 5.2  | 0.0145 | 2.5 | 0.47 | 92.7   | 2.3  | 94.2   | 4.7  | 132.4  | 108.7  | 92.7   | 2.3   | NA          |
| SRC0210-57  | 250  | 16604  | 1.6 | 25.0944 | 17.6 | 0.0801  | 18.3 | 0.0146 | 5.0 | 0.27 | 93.3   | 4.6  | 78.2   | 13.8 | -360.7 | 457.9  | 93.3   | 4.6   | NA          |
| SRC0210-93  | 311  | 14955  | 2.0 | 22.5438 | 24.0 | 0.0898  | 24.3 | 0.0147 | 3.9 | 0.16 | 94.0   | 3.6  | 87.3   | 20.3 | -90.8  | 594.9  | 94.0   | 3.6   | NA          |
| SRC0210-36  | 1931 | 6324   | 6.8 | 20.3821 | 3.3  | 0.0999  | 4.1  | 0.0148 | 2.5 | 0.61 | 94.5   | 2.4  | 96.7   | 3.8  | 150.9  | 76.2   | 94.5   | 2.4   | NA          |
| SRC0210-94  | 504  | 17659  | 3.7 | 21.4948 | 11.3 | 0.0950  | 11.6 | 0.0148 | 2.6 | 0.22 | 94.7   | 2.4  | 92.1   | 10.2 | 24.8   | 272.1  | 94.7   | 2.4   | NA          |
| SRC0210-60  | 168  | 7317   | 2.2 | 23.6805 | 27.5 | 0.0864  | 28.4 | 0.0148 | 7.1 | 0.25 | 94.9   | 6.7  | 84.1   | 22.9 | -212.8 | 701.7  | 94.9   | 6.7   | NA          |
| SRC0210-74  | 241  | 4901   | 1.8 | 22.4071 | 25.3 | 0.0915  | 25.4 | 0.0149 | 2.5 | 0.10 | 95.2   | 2.4  | 88.9   | 21.7 | -75.9  | 627.2  | 95.2   | 2.4   | NA          |
| SRC0210-22  | 942  | 35306  | 1.0 | 20.2215 | 6.6  | 0.1015  | 6.8  | 0.0149 | 1.8 | 0.26 | 95.3   | 1.7  | 98.2   | 6.4  | 169.3  | 154.0  | 95.3   | 1.7   | NA          |
| SRC0210-72  | 602  | 14205  | 1.7 | 21.3635 | 5.0  | 0.0964  | 5.7  | 0.0149 | 2.8 | 0.49 | 95.5   | 2.6  | 93.4   | 5.1  | 39.5   | 119.4  | 95.5   | 2.6   | NA          |
| SRC0210-65  | 560  | 23023  | 2.4 | 20.6375 | 9.2  | 0.1000  | 11.1 | 0.0150 | 6.2 | 0.56 | 95.8   | 5.9  | 96.8   | 10.3 | 121.6  | 217.9  | 95.8   | 5.9   | NA          |
| SRC0210-67  | 560  | 37822  | 2.3 | 20.4859 | 7.7  | 0.1008  | 9.6  | 0.0150 | 5.8 | 0.60 | 95.8   | 5.5  | 97.5   | 8.9  | 138.9  | 180.6  | 95.8   | 5.5   | NA          |
| SRC0210-90  | 425  | 32467  | 3.6 | 21.3988 | 8.4  | 0.0967  | 8.6  | 0.0150 | 2.0 | 0.23 | 96.0   | 1.9  | 93.7   | 7.7  | 35.5   | 201.7  | 96.0   | 1.9   | NA          |
| SRC0210-84  | 267  | 10616  | 1.4 | 24.0251 | 30.7 | 0.0862  | 30.9 | 0.0150 | 3.0 | 0.10 | 96.1   | 2.9  | 83.9   | 24.9 | -249.3 | 793.7  | 96.1   | 2.9   | NA          |
| SRC0210-100 | 381  | 2412   | 1.2 | 20.2136 | 12.3 | 0.1027  | 12.8 | 0.0151 | 3.6 | 0.28 | 96.4   | 3.5  | 99.3   | 12.2 | 170.2  | 288.7  | 96.4   | 3.5   | NA          |
| SRC0210-63  | 305  | 10058  | 3.0 | 19.6028 | 16.7 | 0.1063  | 17.0 | 0.0151 | 3.5 | 0.21 | 96.7   | 3.4  | 102.6  | 16.6 | 241.4  | 386.8  | 96.7   | 3.4   | NA          |
| SRC0210-3   | 459  | 29392  | 2.3 | 21.7736 | 14.5 | 0.0958  | 15.2 | 0.0151 | 4.6 | 0.30 | 96.8   | 4.4  | 92.9   | 13.5 | -6.2   | 351.7  | 96.8   | 4.4   | NA          |
| SRC0210-46  | 399  | 20605  | 2.3 | 21.0609 | 13.8 | 0.0991  | 14.3 | 0.0151 | 4.1 | 0.28 | 96.9   | 3.9  | 96.0   | 13.1 | 73.5   | 328.5  | 96.9   | 3.9   | NA          |
| SRC0210-20  | 209  | 4928   | 1.5 | 20.3069 | 30.6 | 0.1031  | 31.1 | 0.0152 | 5.5 | 0.18 | 97.2   | 5.3  | 99.6   | 29.5 | 159.5  | 731.8  | 97.2   | 5.3   | NA          |
| SRC0210-92  | 525  | 19549  | 2.4 | 21.0730 | 6.0  | 0.0995  | 6.2  | 0.0152 | 1.4 | 0.23 | 97.3   | 1.4  | 96.3   | 5.7  | 72.1   | 143.6  | 97.3   | 1.4   | NA          |
| SRC0210-44  | 272  | 7773   | 3.1 | 21.4123 | 27.0 | 0.0983  | 28.1 | 0.0153 | 8.0 | 0.28 | 97.6   | 7.7  | 95.2   | 25.6 | 34.0   | 666.3  | 97.6   | 7.7   | NA          |
| SRC0210-34  | 442  | 15673  | 1.5 | 22.0349 | 11.3 | 0.0956  | 11.6 | 0.0153 | 2.7 | 0.24 | 97.7   | 2.6  | 92.7   | 10.3 | -35.0  | 274.0  | 97.7   | 2.6   | NA          |
| SRC0210-43  | 184  | 6079   | 2.2 | 21.2039 | 12.7 | 0.0994  | 14.5 | 0.0153 | 6.9 | 0.48 | 97.8   | 6.7  | 96.2   | 13.3 | 57.4   | 304.9  | 97.8   | 6.7   | NA          |
| SRC0210-85  | 204  | 6003   | 3.9 | 20.2614 | 24.2 | 0.1040  | 25.3 | 0.0153 | 7.5 | 0.30 | 97.8   | 7.3  | 100.5  | 24.2 | 164.7  | 572.3  | 97.8   | 7.3   | NA          |
| SRC0210-47  | 1328 | 142645 | 1.4 | 20.4194 | 2.2  | 0.1033  | 2.8  | 0.0153 | 1.7 | 0.61 | 97.9   | 1.6  | 99.8   | 2.7  | 146.6  | 52.1   | 97.9   | 1.6   | NA          |
| SRC0210-6   | 400  | 12398  | 1.9 | 23.3832 | 17.3 | 0.0903  | 17.7 | 0.0153 | 3.8 | 0.22 | 97.9   | 3.7  | 87.8   | 14.9 | -181.2 | 433.8  | 97.9   | 3.7   | NA          |
| SRC0210-62  | 317  | 11200  | 2.3 | 20.5910 | 16.6 | 0.1027  | 17.0 | 0.0153 | 3.7 | 0.22 | 98.1   | 3.6  | 99.2   | 16.1 | 126.9  | 393.6  | 98.1   | 3.6   | NA          |
| SRC0210-82  | 440  | 8872   | 2.3 | 21.8434 | 8.9  | 0.0969  | 9.3  | 0.0153 | 2.7 | 0.29 | 98.2   | 2.7  | 93.9   | 8.3  | -13.9  | 215.4  | 98.2   | 2.7   | NA          |
| SRC0210-69  | 299  | 9370   | 2.1 | 20.7175 | 13.1 | 0.1026  | 13.6 | 0.0154 | 3.7 | 0.27 | 98.7   | 3.6  | 99.2   | 12.9 | 112.4  | 310.8  | 98.7   | 3.6   | NA          |
| SRC0210-78  | 295  | 7938   | 2.3 | 21.9669 | 13.1 | 0.0969  | 13.6 | 0.0154 | 3.8 | 0.28 | 98.7   | 3.7  | 93.9   | 12.2 | -27.6  | 318.0  | 98.7   | 3.7   | NA          |
| SRC0210-13  | 704  | 35190  | 3.3 | 20.8785 | 7.6  | 0.1020  | 8.8  | 0.0154 | 4.3 | 0.49 | 98.8   | 4.2  | 98.6   | 8.2  | 94.1   | 181.0  | 98.8   | 4.2   | NA          |
| SRC0210-41  | 202  | 10344  | 2.7 | 20.9593 | 18.3 | 0.1017  | 18.7 | 0.0155 | 3.7 | 0.20 | 98.9   | 3.7  | 98.4   | 17.5 | 85.0   | 437.6  | 98.9   | 3.7   | NA          |
| SRC0210-80  | 836  | 27086  | 2.2 | 20.1999 | 5.1  | 0.1059  | 5.6  | 0.0155 | 2.3 | 0.41 | 99.3   | 2.3  | 102.2  | 5.4  | 171.8  | 119.1  | 99.3   | 2.3   | NA          |
| SRC0210-53  | 279  | 22064  | 1.8 | 22.3738 | 16.2 | 0.0964  | 16.5 | 0.0156 | 3.2 | 0.20 | 100.1  | 3.2  | 93.5   | 14.7 | -72.2  | 397.3  | 100.1  | 3.2   | NA          |
| SRC0210-89  | 474  | 20794  | 2.5 | 20.8785 | 6.1  | 0.1034  | 9.2  | 0.0157 | 6.8 | 0.74 | 100.1  | 6.8  | 99.9   | 8.7  | 94.1   | 145.6  | 100.1  | 6.8   | NA          |
| SRC0210-2   | 748  | 19511  | 3.2 | 20.1932 | 5.7  | 0.1072  | 6.5  | 0.0157 | 3.1 | 0.47 | 100.4  | 3.1  | 103.4  | 6.4  | 172.6  | 133.8  | 100.4  | 3.1   | NA          |
| SRC0210-35  | 625  | 18655  | 2.2 | 22.1559 | 9.0  | 0.0978  | 9.2  | 0.0157 | 1.9 | 0.21 | 100.6  | 1.9  | 94.8   | 8.3  | -48.4  | 218.1  | 100.6  | 1.9   | NA          |
| SRC0210-61  | 286  | 6771   | 2.0 | 19.2396 | 31.6 | 0.1137  | 31.8 | 0.0159 | 3.5 | 0.11 | 101.5  | 3.5  | 109.4  | 33.0 | 284.3  | 739.7  | 101.5  | 3.5   | NA          |
| SRC0210-33  | 742  | 25833  | 2.4 | 20.1391 | 6.7  | 0.1093  | 6.8  | 0.0160 | 1.4 | 0.21 | 102.1  | 1.5  | 105.3  | 6.8  | 178.8  | 156.0  | 102.1  | 1.5   | NA          |
| SRC0210-88  | 292  | 9211   | 1.3 | 21.1124 | 17.1 | 0.1049  | 17.5 | 0.0161 | 3.9 | 0.22 | 102.7  | 3.9  | 101.3  | 16.9 | 67.7   | 409.6  | 102.7  | 3.9   | NA          |
| SRC0210-17  | 475  | 11845  | 1.7 | 20.6757 | 7.0  | 0.1094  | 7.6  | 0.0164 | 3.1 | 0.40 | 104.9  | 3.2  | 105.4  | 7.6  | 117.2  | 164.8  | 104.9  | 3.2   | NA          |
| SRC0210-52  | 503  | 31116  | 3.4 | 21.1736 | 4.4  | 0.1075  | 5.3  | 0.0165 | 2.9 | 0.55 | 105.6  | 3.0  | 103.7  | 5.2  | 60.8   | 105.4  | 105.6  | 3.0   | NA          |
| SRC0210-64  | 411  | 15297  | 2.4 | 21.5653 | 10.7 | 0.1059  | 11.8 | 0.0166 | 5.0 | 0.42 | 105.9  | 5.2  | 102.2  | 11.5 | 16.9   | 256.9  | 105.9  | 5.2   | NA          |
| SRC0210-79  | 102  | 3352   | 4.5 | 21.6360 | 42.5 | 0.1089  | 43.0 | 0.0171 | 6.8 | 0.16 | 109.2  | 7.4  | 104.9  | 42.9 | 9.1    | 1064.7 | 109.2  | 7.4   | NA          |
| SRC0210-68  | 166  | 10064  | 5.2 | 21.3702 | 31.2 | 0.1553  | 31.5 | 0.0241 | 4.5 | 0.14 | 153.4  | 6.8  | 146.6  | 43.0 | 38.7   | 761.5  | 153.4  | 6.8   | NA          |
| SRC0210-45  | 243  | 41834  | 1.9 | 18.3240 | 2.8  | 0.4473  | 3.6  | 0.0594 | 2.2 | 0.62 | 372.2  | 8.1  | 375.4  | 11.3 | 394.8  | 63.1   | 372.2  | 8.1   | NA          |
| SRC0210-50  | 144  | 37303  | 1.0 | 17.2217 | 6.4  | 0.7122  | 7.2  | 0.0890 | 3.2 | 0.45 | 549.3  | 16.9 | 546.0  | 30.3 | 532.3  | 140.3  | 549.3  | 16.9  | 103.2       |
| SRC0210-73  | 303  | 101769 | 0.9 | 14.8152 | 1.4  | 1.3182  | 2.3  | 0.1416 | 1.9 | 0.80 | 853.9  | 14.9 | 853.7  | 13.4 | 853.2  | 28.9   | 853.9  | 14.9  | 100.1       |
| SRC0210-56  | 135  | 94153  | 0.9 | 13.9450 | 1.1  | 1.6413  | 1.5  | 0.1660 | 1.0 | 0.66 | 990.0  | 9.1  | 986.2  | 9.5  | 977.7  | 22.9   | 977.7  | 22.9  | 101.3       |
| SRC0210-86  | 302  | 270544 | 6.4 | 13.8106 | 0.7  | 1.6743  | 1.4  | 0.1677 | 1.2 | 0.85 | 999.5  | 10.7 | 998.8  | 8.7  | 997.4  | 14.6   | 997.4  | 14.6  | 100.2       |
| SRC0210-81  | 57   | 17846  | 1.0 | 13.5313 | 3.7  | 1.7865  | 5.2  | 0.1753 | 3.6 | 0.70 | 1041.4 | 34.7 | 1040.6 | 33.7 | 1038.8 | 75.0   | 1038.8 | 75.0  | 100.3       |
| SRC0210-58  | 897  | 540622 | 2.6 | 13.3756 | 0.5  | 1.7836  | 1.4  | 0.1730 | 1.3 | 0.93 | 1028.7 | 12.2 | 1039.5 | 9.0  | 1062.2 | 10.2   | 1062.2 | 10.2  | 96.9        |
| SRC0210-37  | 258  | 160868 | 3.0 | 12.2308 | 0.7  | 2.3930  | 1.3  | 0.2123 | 1.1 | 0.85 | 1240.9 | 12.3 | 1240.5 | 9.2  | 1239.8 | 13.2   | 1239.8 | 13.2  | 100.1       |
| SRC0210-10  | 308  | 131591 | 2.0 | 11.6777 | 0.4  | 2.7080  | 1.0  | 0.2294 | 0.9 | 0.92 | 1331.1 | 11.2 | 1330.7 | 7.5  | 1329.9 | 7.6    | 1329.9 | 7.6   | 100.1       |
| SRC0210-    |      |        |     |         |      |         |      |        |     |      |        |      |        |      |        |        |        |       |             |

|               |       |        |     |         |      |        |      |        |      |      |        |      |        |      |        |       |        |       |       |
|---------------|-------|--------|-----|---------|------|--------|------|--------|------|------|--------|------|--------|------|--------|-------|--------|-------|-------|
| SRC0110 - 26  | 656   | 21548  | 2.7 | 21.2189 | 12.2 | 0.0939 | 12.7 | 0.0144 | 3.6  | 0.28 | 92.5   | 3.3  | 91.1   | 11.1 | 55.7   | 291.4 | 92.5   | 3.3   | NA    |
| SRC0110 - 30  | 510   | 19357  | 2.0 | 20.3014 | 15.9 | 0.0983 | 16.0 | 0.0145 | 2.1  | 0.13 | 92.7   | 1.9  | 95.2   | 14.6 | 160.1  | 373.4 | 92.7   | 1.9   | NA    |
| SRC0110 - 48  | 681   | 14802  | 2.0 | 20.1568 | 7.8  | 0.0991 | 8.1  | 0.0145 | 2.1  | 0.26 | 92.7   | 1.9  | 96.0   | 7.4  | 176.8  | 182.4 | 92.7   | 1.9   | NA    |
| SRC0110 - 40  | 852   | 39409  | 3.3 | 21.7886 | 7.4  | 0.0917 | 12.7 | 0.0145 | 10.3 | 0.81 | 92.8   | 9.5  | 89.1   | 10.9 | -7.8   | 179.5 | 92.8   | 9.5   | NA    |
| SRC0110 - 17  | 1226  | 21879  | 1.3 | 21.1132 | 4.9  | 0.0947 | 5.2  | 0.0145 | 1.9  | 0.36 | 92.8   | 1.7  | 91.8   | 4.6  | 67.6   | 115.6 | 92.8   | 1.7   | NA    |
| SRC0110 - 94  | 1242  | 20006  | 1.5 | 21.4255 | 6.2  | 0.0933 | 6.6  | 0.0145 | 2.1  | 0.31 | 92.8   | 1.9  | 90.6   | 5.7  | 32.5   | 149.5 | 92.8   | 1.9   | NA    |
| SRC0110 - 34  | 702   | 36736  | 2.9 | 21.7595 | 8.8  | 0.0926 | 9.9  | 0.0146 | 4.6  | 0.46 | 93.5   | 4.2  | 89.9   | 8.5  | -4.6   | 212.5 | 93.5   | 4.2   | NA    |
| SRC0110 - 27  | 562   | 10159  | 1.0 | 20.5688 | 4.9  | 0.0982 | 5.3  | 0.0146 | 2.2  | 0.40 | 93.7   | 2.0  | 95.1   | 4.8  | 129.4  | 114.9 | 93.7   | 2.0   | NA    |
| SRC0110 - 24  | 632   | 8162   | 3.6 | 20.1079 | 13.1 | 0.1005 | 15.2 | 0.0147 | 7.7  | 0.51 | 93.8   | 7.1  | 97.3   | 14.1 | 182.4  | 305.9 | 93.8   | 7.1   | NA    |
| SRC0110 - 9   | 394   | 10552  | 2.8 | 19.0432 | 17.0 | 0.1062 | 19.3 | 0.0147 | 9.3  | 0.48 | 93.8   | 8.6  | 102.5  | 18.8 | 307.8  | 388.9 | 93.8   | 8.6   | NA    |
| SRC0110 - 102 | 442   | 18290  | 3.2 | 23.1697 | 18.3 | 0.0873 | 19.7 | 0.0147 | 7.3  | 0.37 | 93.9   | 6.8  | 85.0   | 16.1 | -158.4 | 458.8 | 93.9   | 6.8   | NA    |
| SRC0110 - 71  | 570   | 19289  | 2.0 | 20.6086 | 9.4  | 0.0983 | 9.8  | 0.0147 | 2.6  | 0.26 | 94.0   | 2.4  | 95.2   | 8.9  | 124.8  | 222.3 | 94.0   | 2.4   | NA    |
| SRC0110 - 11  | 462   | 15125  | 4.2 | 24.0548 | 11.4 | 0.0843 | 12.6 | 0.0147 | 5.5  | 0.43 | 94.1   | 5.1  | 82.2   | 10.0 | -252.4 | 289.6 | 94.1   | 5.1   | NA    |
| SRC0110 - 42  | 463   | 14791  | 4.1 | 24.6943 | 15.8 | 0.0823 | 17.5 | 0.0147 | 7.6  | 0.43 | 94.3   | 7.1  | 80.3   | 13.5 | -319.3 | 407.9 | 94.3   | 7.1   | NA    |
| SRC0110 - 69  | 446   | 9079   | 1.8 | 23.7306 | 20.4 | 0.0858 | 21.6 | 0.0148 | 7.1  | 0.33 | 94.5   | 6.7  | 83.6   | 17.3 | -218.2 | 517.0 | 94.5   | 6.7   | NA    |
| SRC0110 - 19  | 341   | 8081   | 2.5 | 21.1628 | 16.7 | 0.0963 | 17.6 | 0.0148 | 5.3  | 0.30 | 94.5   | 5.0  | 93.3   | 15.7 | 62.0   | 401.4 | 94.5   | 5.0   | NA    |
| SRC0110 - 68  | 438   | 9199   | 2.3 | 23.1735 | 18.2 | 0.0880 | 19.1 | 0.0148 | 5.8  | 0.30 | 94.7   | 5.5  | 85.6   | 15.7 | -158.8 | 454.6 | 94.7   | 5.5   | NA    |
| SRC0110 - 63  | 568   | 15868  | 1.8 | 21.6940 | 16.5 | 0.0944 | 16.8 | 0.0149 | 3.5  | 0.21 | 95.0   | 3.3  | 91.6   | 14.7 | 2.6    | 398.8 | 95.0   | 3.3   | NA    |
| SRC0110 - 64  | 1042  | 34845  | 1.9 | 21.9218 | 10.7 | 0.0935 | 12.8 | 0.0149 | 7.1  | 0.55 | 95.1   | 6.7  | 90.7   | 11.1 | -22.6  | 258.5 | 95.1   | 6.7   | NA    |
| SRC0110 - 23  | 476   | 15529  | 2.8 | 22.0001 | 13.1 | 0.0934 | 14.7 | 0.0149 | 6.7  | 0.46 | 95.3   | 6.4  | 90.6   | 12.7 | -31.2  | 318.2 | 95.3   | 6.4   | NA    |
| SRC0110 - 2   | 634   | 17878  | 2.7 | 20.6933 | 12.2 | 0.0993 | 12.7 | 0.0149 | 3.4  | 0.27 | 95.3   | 3.2  | 96.1   | 11.7 | 115.2  | 289.6 | 95.3   | 3.2   | NA    |
| SRC0110 - 3   | 750   | 16706  | 1.2 | 21.6053 | 6.7  | 0.0952 | 9.2  | 0.0149 | 6.3  | 0.68 | 95.4   | 5.9  | 92.3   | 8.1  | 12.5   | 162.4 | 95.4   | 5.9   | NA    |
| SRC0110 - 49  | 502   | 14065  | 1.6 | 21.8205 | 15.4 | 0.0943 | 15.7 | 0.0149 | 3.2  | 0.20 | 95.5   | 3.1  | 91.5   | 13.8 | -11.4  | 374.1 | 95.5   | 3.1   | NA    |
| SRC0110 - 50  | 645   | 8181   | 3.4 | 23.8914 | 12.9 | 0.0864 | 14.4 | 0.0150 | 6.3  | 0.44 | 95.8   | 6.0  | 84.2   | 11.6 | -235.2 | 326.3 | 95.8   | 6.0   | NA    |
| SRC0110 - 61  | 548   | 10476  | 3.2 | 22.4341 | 16.7 | 0.0924 | 17.3 | 0.0150 | 4.7  | 0.27 | 96.2   | 4.5  | 89.7   | 14.9 | -78.8  | 410.0 | 96.2   | 4.5   | NA    |
| SRC0110 - 5   | 275   | 5009   | 2.7 | 18.6701 | 16.7 | 0.1111 | 17.3 | 0.0150 | 4.8  | 0.27 | 96.3   | 4.5  | 107.0  | 17.6 | 352.6  | 378.6 | 96.3   | 4.5   | NA    |
| SRC0110 - 66  | 200   | 4671   | 2.0 | 23.6466 | 18.0 | 0.0878 | 20.3 | 0.0151 | 9.5  | 0.47 | 96.4   | 9.1  | 85.5   | 16.7 | -209.2 | 454.9 | 96.4   | 9.1   | NA    |
| SRC0110 - 78  | 394   | 14061  | 2.1 | 17.9095 | 19.0 | 0.1163 | 19.6 | 0.0151 | 4.5  | 0.23 | 96.6   | 4.4  | 111.7  | 20.7 | 445.8  | 426.8 | 96.6   | 4.4   | NA    |
| SRC0110 - 67  | 400   | 15798  | 1.7 | 18.0741 | 20.6 | 0.1157 | 20.9 | 0.0152 | 3.4  | 0.16 | 97.0   | 3.3  | 111.2  | 22.0 | 425.5  | 464.8 | 97.0   | 3.3   | NA    |
| SRC0110 - 45  | 918   | 14097  | 1.2 | 20.5319 | 5.6  | 0.1019 | 7.8  | 0.0152 | 5.4  | 0.70 | 97.1   | 5.2  | 98.5   | 7.3  | 133.6  | 131.0 | 97.1   | 5.2   | NA    |
| SRC0110 - 4   | 1030  | 20704  | 4.3 | 21.6745 | 5.8  | 0.0978 | 6.1  | 0.0154 | 1.8  | 0.29 | 98.3   | 1.7  | 94.7   | 5.5  | 4.8    | 140.2 | 98.3   | 1.7   | NA    |
| SRC0110 - 74  | 194   | 5031   | 1.8 | 17.8322 | 37.9 | 0.1189 | 38.3 | 0.0154 | 5.9  | 0.15 | 98.3   | 5.7  | 114.0  | 41.4 | 455.5  | 869.5 | 98.3   | 5.7   | NA    |
| SRC0110 - 18  | 252   | 3743   | 2.0 | 23.4553 | 31.8 | 0.0905 | 32.0 | 0.0154 | 3.4  | 0.11 | 98.5   | 3.3  | 88.0   | 27.0 | -188.9 | 813.1 | 98.5   | 3.3   | NA    |
| SRC0110 - 82  | 293   | 9909   | 4.0 | 18.8060 | 15.9 | 0.1131 | 19.8 | 0.0154 | 11.8 | 0.60 | 98.7   | 11.5 | 108.8  | 20.4 | 336.3  | 362.2 | 98.7   | 11.5  | NA    |
| SRC0110 - 70  | 346   | 7534   | 1.9 | 24.1323 | 22.7 | 0.0882 | 23.8 | 0.0154 | 7.2  | 0.30 | 98.8   | 7.1  | 85.9   | 19.6 | -260.5 | 580.8 | 98.8   | 7.1   | NA    |
| SRC0110 - 104 | 326   | 6529   | 8.2 | 20.6604 | 17.8 | 0.1039 | 18.9 | 0.0156 | 6.2  | 0.33 | 99.6   | 6.2  | 100.4  | 18.1 | 118.9  | 423.2 | 99.6   | 6.2   | NA    |
| SRC0110 - 16  | 1855  | 26871  | 4.3 | 20.5223 | 3.9  | 0.1048 | 4.7  | 0.0156 | 2.7  | 0.57 | 99.8   | 2.6  | 101.2  | 4.5  | 134.7  | 91.3  | 99.8   | 2.6   | NA    |
| SRC0110 - 22  | 427   | 3805   | 1.6 | 19.2611 | 23.9 | 0.1125 | 24.5 | 0.0157 | 5.4  | 0.22 | 100.5  | 5.3  | 108.2  | 25.2 | 281.8  | 554.7 | 100.5  | 5.3   | NA    |
| SRC0110 - 97  | 725   | 13617  | 2.8 | 20.6329 | 12.9 | 0.1051 | 13.0 | 0.0157 | 2.2  | 0.17 | 100.6  | 2.2  | 101.5  | 12.6 | 122.1  | 304.0 | 100.6  | 2.2   | NA    |
| SRC0110 - 105 | 546   | 18867  | 2.6 | 20.3026 | 13.6 | 0.1070 | 14.4 | 0.0158 | 4.7  | 0.33 | 100.8  | 4.7  | 103.3  | 14.1 | 160.0  | 319.5 | 100.8  | 4.7   | NA    |
| SRC0110 - 84  | 876   | 15329  | 4.0 | 21.3270 | 8.8  | 0.1028 | 10.3 | 0.0159 | 5.2  | 0.51 | 101.7  | 5.3  | 99.3   | 9.7  | 43.6   | 211.4 | 101.7  | 5.3   | NA    |
| SRC0110 - 31  | 540   | 10996  | 3.0 | 21.1995 | 12.3 | 0.1041 | 13.1 | 0.0160 | 4.4  | 0.34 | 102.4  | 4.5  | 100.6  | 12.5 | 57.9   | 294.8 | 102.4  | 4.5   | NA    |
| SRC0110 - 47  | 830   | 24304  | 1.9 | 19.7036 | 4.5  | 0.1144 | 5.7  | 0.0164 | 3.4  | 0.60 | 104.6  | 3.6  | 110.0  | 5.9  | 229.6  | 105.0 | 104.6  | 3.6   | NA    |
| SRC0110 - 83  | 315   | 5254   | 3.2 | 20.5082 | 14.0 | 0.1103 | 15.8 | 0.0164 | 7.4  | 0.47 | 104.9  | 7.7  | 106.2  | 16.0 | 136.3  | 330.3 | 104.9  | 7.7   | NA    |
| SRC0110 - 32  | 214   | 4941   | 2.3 | 21.1363 | 19.0 | 0.1237 | 20.1 | 0.0190 | 6.5  | 0.32 | 121.1  | 7.8  | 118.4  | 22.4 | 65.0   | 455.9 | 121.1  | 7.8   | NA    |
| SRC0110 - 12  | 347   | 25704  | 6.4 | 21.8778 | 11.7 | 0.1501 | 12.6 | 0.0238 | 4.7  | 0.37 | 151.7  | 7.1  | 142.0  | 16.7 | -17.7  | 284.1 | 151.7  | 7.1   | NA    |
| SRC0110 - 29  | 285   | 16232  | 2.0 | 20.8102 | 14.7 | 0.1758 | 14.9 | 0.0265 | 2.6  | 0.18 | 168.8  | 4.4  | 164.4  | 22.6 | 101.9  | 348.6 | 168.8  | 4.4   | NA    |
| SRC0110 - 55  | 339   | 36989  | 1.3 | 15.9151 | 4.3  | 0.8150 | 5.7  | 0.0941 | 3.8  | 0.67 | 579.6  | 21.3 | 605.3  | 26.2 | 702.6  | 91.1  | 579.6  | 21.3  | 82.5  |
| SRC0110 - 85  | 191   | 69884  | 2.5 | 12.8432 | 2.2  | 2.0461 | 3.9  | 0.1906 | 3.3  | 0.83 | 1124.5 | 33.6 | 1131.0 | 26.8 | 1143.4 | 43.8  | 1143.4 | 43.8  | 98.4  |
| SRC0110 - 20  | 343   | 122121 | 3.8 | 12.7206 | 0.7  | 2.0368 | 2.0  | 0.1879 | 1.9  | 0.94 | 1110.0 | 19.3 | 1127.9 | 13.7 | 1162.4 | 13.4  | 1162.4 | 13.4  | 95.5  |
| SRC0110 - 8   | 48    | 19764  | 3.0 | 12.6861 | 9.3  | 2.1793 | 11.8 | 0.2005 | 7.2  | 0.61 | 1178.1 | 77.5 | 1174.4 | 82.0 | 1167.8 | 184.4 | 1167.8 | 184.4 | 100.9 |
| SRC0110 - 76  | 438   | 258489 | 1.4 | 11.0380 | 0.4  | 3.0735 | 1.0  | 0.2461 | 0.9  | 0.90 | 1418.1 | 11.3 | 1426.1 | 7.6  | 1438.1 | 8.2   | 1438.1 | 8.2   | 98.6  |
| SRC0110 - 79  | 477   | 198814 | 3.4 | 9.4989  | 0.7  | 4.3272 | 1.8  | 0.2981 | 1.7  | 0.93 | 1682.0 | 24.5 | 1698.6 | 14.7 | 1719.1 | 12.2  | 1719.1 | 12.2  | 97.8  |
| SRC0110 - 54  | 312   | 110993 | 2.7 | 9.3454  | 0.6  | 4.2317 | 6.1  | 0.2868 | 6.1  | 1.00 | 1625.6 | 87.2 | 1680.2 | 50.1 | 1749.0 | 10.1  | 1749.0 | 10.1  | 92.9  |
| SRC0110 - 95  | 79    | 35449  | 2.2 | 9.2495  | 2.2  | 4.6937 | 2.9  | 0.3149 | 1.9  | 0.65 | 1764.6 | 28.6 | 1766.1 | 24.0 | 1767.9 | 39.9  | 1767.9 | 39.9  | 99.8  |
| SRC0110 - 75  | 138   | 85728  | 1.9 | 9.2131  | 0.8  | 4.6459 | 1.6  | 0.3104 | 1.4  | 0.88 | 1742.9 | 21.3 | 1757.6 | 13.3 | 1775.1 | 14.0  | 1775.1 | 14.0  | 98.2  |
| SRC0110 - 72  | 552   | 307457 | 9.0 | 9.1486  | 0.3  | 4.5686 | 2.2  | 0.3031 | 2.2  | 0.99 | 1706.8 | 32.4 | 1743.6 | 18.2 | 1787.9 | 5.7   | 1787.9 | 5.7   | 95.5  |
| SRC0110 - 65  | 233   | 78690  | 1.4 | 9.1337  | 0.6  | 4.7009 | 2.2  | 0.3114 | 2.1  | 0.96 | 1747.6 | 31.8 | 1767.4 | 18.2 | 1790.8 | 11.7  | 1790.8 | 11.7  | 97.6  |
| SRC0110 - 41  | 216   | 84371  | 3.2 | 9.1304  | 0.6  | 4.7280 | 5.5  | 0.3131 | 5.5  | 0.99 | 1755.9 | 84.3 | 1772.2 | 46.3 | 1791.5 | 11.1  | 1791.5 | 11.1  | 98.0  |
| SRC0110 - 93  | 187   | 107684 | 1.4 | 9.1086  | 1.0  | 4.6022 | 1.9  | 0.3040 | 1.7  | 0.87 | 1711.2 | 25.3 | 1749.7 | 16.2 | 1795.9 | 17.5  | 1795.9 | 17.5  | 95.3  |
| SRC0110 - 59  | 421   | 351217 | 2.8 | 9.1049  | 0.7  | 4.8949 | 3.2  | 0.3232 | 3.1  | 0.97 | 1805.5 | 48.4 | 1801.4 | 26.6 | 1796.6 | 13.2  | 1796.6 | 13.2  | 100.5 |
| SRC0110 - 51  | 187   | 57907  | 2.6 | 9.0992  | 0.8  | 4.6858 | 5.3  | 0.3092 | 5.2  | 0.99 | 1736.9 | 79.2 | 1764.7 | 44.1 | 1797.7 | 14.1  | 1797.7 | 14.1  | 96.6  |
| SRC0110 - 77  | 236   | 141390 | 2.4 | 9.0886  | 0.5  | 4.8030 | 1.9  | 0.3166 | 1.8  | 0.97 | 1773.1 | 28.4 | 1785.4 | 15.9 | 1799.9 | 8.3   | 1799.9 | 8.3   | 98.5  |
| SRC0110 - 98  | 370   | 107173 | 1.3 | 9.0799  | 1.5  | 4.6758 | 3.5  | 0.3079 | 3.2  | 0.91 | 1730.5 | 48.7 | 1762.9 | 29.6 | 1801.6 | 27.1  | 1801.6 | 27.1  | 96.1  |
| SRC0110 - 88  | 111</ |        |     |         |      |        |      |        |      |      |        |      |        |      |        |       |        |       |       |



|             |      |       |     |         |      |        |      |        |     |      |       |      |       |      |        |       |       |      |        |      |             |
|-------------|------|-------|-----|---------|------|--------|------|--------|-----|------|-------|------|-------|------|--------|-------|-------|------|--------|------|-------------|
| BHB-8-1     |      |       |     |         |      |        |      |        |     |      |       |      |       |      |        |       |       |      | 1673.9 | 69.5 | 99.9        |
| BHB-8-1     |      |       |     |         |      |        |      |        |     |      |       |      |       |      |        |       |       |      | 1726.8 | 36.5 | 95.8        |
| BHB-8-1     |      |       |     |         |      |        |      |        |     |      |       |      |       |      |        |       |       |      | 1730.5 | 31.3 | 100.0       |
| BHB-8-1     |      |       |     |         |      |        |      |        |     |      |       |      |       |      |        |       |       |      | 1731.9 | 31.6 | 84.2        |
| BHB-8-1     |      |       |     |         |      |        |      |        |     |      |       |      |       |      |        |       |       |      | 1737.8 | 31.6 | 100.1       |
| BHB-8-1     |      |       |     |         |      |        |      |        |     |      |       |      |       |      |        |       |       |      | 1753.0 | 46.1 | 99.8        |
| BHB-8-1     |      |       |     |         |      |        |      |        |     |      |       |      |       |      |        |       |       |      | 1754.0 | 65.1 | 94.8        |
| BHB-8-1     |      |       |     |         |      |        |      |        |     |      |       |      |       |      |        |       |       |      | 1770.9 | 48.8 | 100.0       |
| BHB-8-1     |      |       |     |         |      |        |      |        |     |      |       |      |       |      |        |       |       |      | 1780.1 | 50.9 | 100.0       |
| BHB-8-1     |      |       |     |         |      |        |      |        |     |      |       |      |       |      |        |       |       |      | 1782.1 | 33.4 | 100.0       |
| BHB-8-1     |      |       |     |         |      |        |      |        |     |      |       |      |       |      |        |       |       |      | 1782.5 | 58.0 | 100.0       |
| BHB-8-1     |      |       |     |         |      |        |      |        |     |      |       |      |       |      |        |       |       |      | 1814.3 | 57.4 | 100.0       |
| BHB-8-1     |      |       |     |         |      |        |      |        |     |      |       |      |       |      |        |       |       |      | 1828.4 | 43.5 | 100.0       |
| BHB-8-1     |      |       |     |         |      |        |      |        |     |      |       |      |       |      |        |       |       |      | 1953.2 | 44.8 | 100.0       |
| BHB-8-1     |      |       |     |         |      |        |      |        |     |      |       |      |       |      |        |       |       |      | 1992.5 | 49.9 | 100.1       |
| BHB-8-1     |      |       |     |         |      |        |      |        |     |      |       |      |       |      |        |       |       |      | 2650.7 | 47.3 | 97.7        |
| BHB-8-1     |      |       |     |         |      |        |      |        |     |      |       |      |       |      |        |       |       |      | 2690.2 | 51.8 | 100.0       |
|             |      |       |     |         |      |        |      |        |     |      |       |      |       |      |        |       |       |      |        |      |             |
| PLR0110-60  | 506  | 9374  | 2.1 | 21.7678 | 6.8  | 0.0927 | 7.5  | 0.0146 | 3.3 | 0.44 | 93.7  | 3.1  | 90.1  | 6.5  | -5.5   | 163.2 | 93.7  | 3.1  |        |      | NA 1.1, 1.0 |
| PLR0110-85  | 382  | 9897  | 3.1 | 19.2162 | 16.0 | 0.1053 | 16.3 | 0.0147 | 3.0 | 0.19 | 93.9  | 2.8  | 101.7 | 15.7 | 287.1  | 367.0 | 93.9  | 2.8  |        |      | NA          |
| PLR0110-99  | 613  | 11177 | 1.0 | 19.7603 | 7.8  | 0.1025 | 8.1  | 0.0147 | 2.2 | 0.27 | 94.0  | 2.0  | 99.1  | 7.6  | 222.9  | 180.0 | 94.0  | 2.0  |        |      | NA          |
| PLR0110-66  | 792  | 16879 | 4.3 | 20.7450 | 7.2  | 0.0979 | 8.1  | 0.0147 | 3.9 | 0.48 | 94.3  | 3.6  | 94.9  | 7.4  | 109.3  | 169.4 | 94.3  | 3.6  |        |      | NA          |
| PLR0110-19  | 259  | 6206  | 1.7 | 22.2438 | 23.2 | 0.0915 | 23.5 | 0.0148 | 3.2 | 0.14 | 94.4  | 3.0  | 88.9  | 20.0 | -58.0  | 573.0 | 94.4  | 3.0  |        |      | NA          |
| PLR0110-47  | 1530 | 46159 | 3.5 | 20.9546 | 3.2  | 0.0981 | 4.1  | 0.0149 | 2.6 | 0.64 | 95.4  | 2.5  | 95.0  | 3.7  | 85.5   | 75.1  | 95.4  | 2.5  |        |      | NA          |
| PLR0110-42  | 470  | 6505  | 2.1 | 20.7217 | 8.6  | 0.0995 | 8.9  | 0.0150 | 2.2 | 0.24 | 95.7  | 2.1  | 96.4  | 8.2  | 112.0  | 204.3 | 95.7  | 2.1  |        |      | NA          |
| PLR0110-3   | 661  | 8106  | 1.7 | 20.2823 | 5.7  | 0.1020 | 5.9  | 0.0150 | 1.7 | 0.28 | 96.1  | 1.6  | 98.7  | 5.6  | 162.3  | 133.2 | 96.1  | 1.6  |        |      | NA          |
| PLR0110-55  | 615  | 9035  | 1.4 | 21.2689 | 3.5  | 0.0975 | 6.0  | 0.0150 | 4.8 | 0.81 | 96.2  | 4.6  | 94.4  | 5.4  | 50.1   | 82.6  | 96.2  | 4.6  |        |      | NA          |
| PLR0110-61  | 1418 | 33209 | 1.1 | 21.3117 | 6.2  | 0.0973 | 6.5  | 0.0150 | 1.8 | 0.27 | 96.2  | 1.7  | 94.3  | 5.8  | 45.3   | 148.9 | 96.2  | 1.7  |        |      | NA          |
| PLR0110-49  | 234  | 5052  | 3.0 | 20.2162 | 24.5 | 0.1027 | 25.2 | 0.0151 | 5.7 | 0.23 | 96.3  | 5.5  | 99.2  | 23.8 | 169.9  | 580.4 | 96.3  | 5.5  |        |      | NA          |
| PLR0110-90  | 1247 | 25285 | 2.0 | 21.2007 | 7.2  | 0.0979 | 8.0  | 0.0151 | 3.4 | 0.43 | 96.3  | 3.3  | 94.9  | 7.2  | 57.7   | 171.7 | 96.3  | 3.3  |        |      | NA          |
| PLR0110-82  | 805  | 10910 | 2.4 | 20.2448 | 3.1  | 0.1026 | 3.8  | 0.0151 | 2.1 | 0.55 | 96.3  | 2.0  | 99.1  | 3.6  | 166.6  | 73.5  | 96.3  | 2.0  |        |      | NA          |
| PLR0110-21  | 572  | 14293 | 1.1 | 22.1553 | 7.1  | 0.0938 | 8.2  | 0.0151 | 4.1 | 0.50 | 96.5  | 3.9  | 91.1  | 7.1  | -48.3  | 172.9 | 96.5  | 3.9  |        |      | NA          |
| PLR0110-69  | 911  | 19614 | 2.3 | 20.3124 | 4.3  | 0.1026 | 4.7  | 0.0151 | 1.9 | 0.41 | 96.7  | 1.9  | 99.2  | 4.5  | 158.9  | 101.3 | 96.7  | 1.9  |        |      | NA          |
| PLR0110-46  | 339  | 5088  | 1.6 | 22.3058 | 8.1  | 0.0935 | 10.6 | 0.0151 | 6.9 | 0.65 | 96.8  | 6.6  | 90.8  | 9.2  | -64.8  | 197.5 | 96.8  | 6.6  |        |      | NA          |
| PLR0110-59  | 445  | 11843 | 2.3 | 20.9095 | 13.7 | 0.1002 | 14.0 | 0.0152 | 3.0 | 0.21 | 97.2  | 2.9  | 96.9  | 13.0 | 90.6   | 325.7 | 97.2  | 2.9  |        |      | NA          |
| PLR0110-25  | 394  | 5677  | 2.7 | 21.9975 | 9.3  | 0.0953 | 10.1 | 0.0152 | 3.9 | 0.39 | 97.3  | 3.8  | 92.4  | 8.9  | -30.9  | 224.8 | 97.3  | 3.8  |        |      | NA          |
| PLR0110-64  | 370  | 6780  | 2.2 | 22.2199 | 12.8 | 0.0944 | 13.6 | 0.0152 | 4.5 | 0.33 | 97.3  | 4.4  | 91.6  | 11.9 | -55.4  | 314.0 | 97.3  | 4.4  |        |      | NA          |
| PLR0110-78  | 429  | 14597 | 2.4 | 20.2069 | 8.7  | 0.1040 | 9.5  | 0.0152 | 3.6 | 0.38 | 97.5  | 3.5  | 100.5 | 9.0  | 171.0  | 204.4 | 97.5  | 3.5  |        |      | NA          |
| PLR0110-86  | 504  | 19749 | 1.8 | 20.0151 | 8.9  | 0.1059 | 9.6  | 0.0154 | 3.5 | 0.36 | 98.4  | 3.4  | 102.2 | 9.3  | 193.3  | 207.5 | 98.4  | 3.4  |        |      | NA          |
| PLR0110-33  | 715  | 25841 | 3.4 | 20.3285 | 8.8  | 0.1045 | 9.0  | 0.0154 | 1.8 | 0.20 | 98.5  | 1.7  | 100.9 | 8.6  | 157.0  | 206.8 | 98.5  | 1.7  |        |      | NA          |
| PLR0110-58  | 374  | 10296 | 1.8 | 19.3761 | 13.2 | 0.1097 | 14.3 | 0.0154 | 5.4 | 0.38 | 98.6  | 5.3  | 105.7 | 14.3 | 268.2  | 303.6 | 98.6  | 5.3  |        |      | NA          |
| PLR0110-84  | 631  | 20961 | 2.9 | 21.5788 | 12.6 | 0.0985 | 12.7 | 0.0154 | 1.7 | 0.13 | 98.6  | 1.7  | 95.4  | 11.5 | 15.4   | 302.7 | 98.6  | 1.7  |        |      | NA          |
| PLR0110-51  | 473  | 10288 | 1.6 | 19.8191 | 10.4 | 0.1073 | 10.8 | 0.0154 | 3.1 | 0.29 | 98.7  | 3.0  | 103.5 | 10.7 | 216.0  | 241.0 | 98.7  | 3.0  |        |      | NA          |
| PLR0110-91  | 838  | 18773 | 3.2 | 20.8178 | 5.2  | 0.1022 | 6.1  | 0.0154 | 3.1 | 0.51 | 98.7  | 3.0  | 98.8  | 5.7  | 101.1  | 123.2 | 98.7  | 3.0  |        |      | NA          |
| PLR0110-6   | 430  | 8641  | 1.8 | 21.7653 | 12.9 | 0.0980 | 13.1 | 0.0155 | 2.1 | 0.16 | 98.9  | 2.0  | 94.9  | 11.9 | -5.3   | 313.0 | 98.9  | 2.0  |        |      | NA          |
| PLR0110-70  | 396  | 9200  | 2.0 | 22.9451 | 11.9 | 0.0933 | 12.4 | 0.0155 | 3.3 | 0.26 | 99.3  | 3.2  | 90.6  | 10.7 | -134.2 | 295.9 | 99.3  | 3.2  |        |      | NA          |
| PLR0110-26  | 397  | 6904  | 2.3 | 20.5796 | 13.6 | 0.1042 | 14.3 | 0.0156 | 4.3 | 0.30 | 99.5  | 4.3  | 100.7 | 13.7 | 128.2  | 321.8 | 99.5  | 4.3  |        |      | NA          |
| PLR0110-76  | 1832 | 39987 | 1.9 | 21.0801 | 3.6  | 0.1021 | 4.9  | 0.0156 | 3.3 | 0.68 | 99.8  | 3.3  | 98.7  | 4.6  | 71.3   | 84.7  | 99.8  | 3.3  |        |      | NA          |
| PLR0110-54  | 385  | 8810  | 1.7 | 23.8601 | 10.9 | 0.0903 | 11.3 | 0.0156 | 3.1 | 0.27 | 100.0 | 3.1  | 87.8  | 9.5  | -231.9 | 275.7 | 100.0 | 3.1  |        |      | NA          |
| PLR0110-68  | 934  | 12614 | 1.6 | 20.7106 | 5.7  | 0.1041 | 6.0  | 0.0156 | 1.9 | 0.32 | 100.0 | 1.9  | 100.6 | 5.8  | 113.3  | 134.6 | 100.0 | 1.9  |        |      | NA          |
| PLR0110-22  | 1138 | 29358 | 2.3 | 21.1323 | 3.0  | 0.1022 | 4.4  | 0.0157 | 3.2 | 0.73 | 100.2 | 3.2  | 98.8  | 4.1  | 65.4   | 71.3  | 100.2 | 3.2  |        |      | NA          |
| PLR0110-75  | 1821 | 54678 | 1.0 | 20.7534 | 2.2  | 0.1045 | 3.0  | 0.0157 | 2.1 | 0.69 | 100.6 | 2.1  | 100.9 | 2.9  | 108.4  | 51.4  | 100.6 | 2.1  |        |      | NA          |
| PLR0110-50  | 329  | 7958  | 1.5 | 23.2074 | 16.0 | 0.0934 | 16.4 | 0.0157 | 3.6 | 0.22 | 100.6 | 3.6  | 90.7  | 14.3 | -162.4 | 401.0 | 100.6 | 3.6  |        |      | NA          |
| PLR0110-97  | 364  | 4580  | 2.2 | 21.9454 | 11.8 | 0.0993 | 12.7 | 0.0158 | 4.7 | 0.37 | 101.0 | 4.7  | 96.1  | 11.7 | -25.2  | 286.8 | 101.0 | 4.7  |        |      | NA          |
| PLR0110-87  | 1294 | 14614 | 1.6 | 18.2706 | 12.5 | 0.1192 | 12.9 | 0.0158 | 3.2 | 0.25 | 101.1 | 3.2  | 114.4 | 14.0 | 401.3  | 281.4 | 101.1 | 3.2  |        |      | NA          |
| PLR0110-12  | 1033 | 12223 | 1.9 | 21.6267 | 5.7  | 0.1008 | 5.8  | 0.0158 | 1.3 | 0.22 | 101.1 | 1.3  | 97.5  | 5.4  | 10.1   | 136.3 | 101.1 | 1.3  |        |      | NA          |
| PLR0110-93  | 1422 | 67684 | 2.6 | 20.4823 | 1.9  | 0.1085 | 3.9  | 0.0161 | 3.5 | 0.88 | 103.0 | 3.5  | 104.6 | 3.9  | 139.4  | 44.2  | 103.0 | 3.5  |        |      | NA          |
| PLR0110-36  | 395  | 6629  | 2.0 | 19.2804 | 15.5 | 0.1155 | 15.9 | 0.0161 | 3.5 | 0.22 | 103.3 | 3.6  | 111.0 | 16.7 | 279.5  | 357.3 | 103.3 | 3.6  |        |      | NA          |
| PLR0110-28  | 733  | 12564 | 2.2 | 20.2600 | 7.5  | 0.1111 | 8.2  | 0.0163 | 3.2 | 0.39 | 104.4 | 3.3  | 107.0 | 8.3  | 164.9  | 176.5 | 104.4 | 3.3  |        |      | NA          |
| PLR0110-32  | 135  | 3730  | 1.4 | 26.1179 | 32.0 | 0.0870 | 32.5 | 0.0165 | 5.5 | 0.17 | 105.3 | 5.7  | 84.7  | 26.4 | -465.2 | 864.3 | 105.3 | 5.7  |        |      | NA          |
| PLR0110-23  | 283  | 6369  | 1.9 | 23.1943 | 14.2 | 0.1008 | 14.7 | 0.0169 | 3.9 | 0.27 | 108.3 | 4.2  | 97.5  | 13.7 | -161.0 | 354.5 | 108.3 | 4.2  |        |      | NA          |
| PLR0110-83  | 923  | 15655 | 1.9 | 19.5365 | 5.1  | 0.1197 | 6.8  | 0.0170 | 4.4 | 0.66 | 108.4 | 4.8  | 114.8 | 7.4  | 249.3  | 118.0 | 108.4 | 4.8  |        |      | NA          |
| PLR0110-11  | 448  | 8518  | 2.3 | 21.2918 | 9.1  | 0.1105 | 9.4  | 0.0171 | 2.1 | 0.23 | 109.1 | 2.3  | 106.4 | 9.5  | 47.5   | 218.7 | 109.1 | 2.3  |        |      | NA          |
| PLR0110-71  | 682  | 12182 | 1.6 | 21.7241 | 7.5  | 0.1100 | 8.1  | 0.0173 | 3.0 | 0.37 | 110.7 | 3.3  | 105.9 | 8.1  | -0.7   | 181.3 | 110.7 | 3.3  |        |      | NA          |
| PLR0110-100 | 165  | 2782  | 2.2 | 24.3161 | 14.2 | 0.1053 | 15.6 | 0.0186 | 6.4 | 0.41 | 118.7 | 7.5  | 101.7 | 15.1 | -279.8 | 363.5 | 118.7 | 7.5  |        |      | NA          |
| PLR0110-72  | 162  | 5417  | 2.3 | 26.5928 | 16.8 | 0.0992 | 18.6 | 0.0191 | 7.9 | 0.43 | 122.1 | 9.6  | 96.0  | 17.0 | -513.1 | 451.5 | 122.1 | 9.6  |        |      | NA          |
| PLR0110-27  | 258  | 9145  | 2.3 | 22.1048 | 11.9 | 0.1544 | 12.3 | 0.0248 | 3.0 | 0.25 | 157.7 | 4.7  | 145.8 | 16.7 | -42.7  | 289.6 | 157.7 | 4.7  |        |      | NA          |
| PLR0110-31  | 304  | 11241 | 1.5 | 19.8320 | 8.4  | 0.1819 | 9.0  | 0.0262 | 3.2 | 0.35 | 166.5 | 5.2  | 169.7 | 14.1 | 214.6  | 195.8 | 166.5 | 5.2  |        |      | NA          |
| PLR0110-57  | 478  | 12992 | 2.0 | 20.8171 | 9.4  | 0.1811 | 10.1 | 0.0273 | 3.5 | 0.34 | 173.9 | 5.9  | 169.0 | 15.7 | 101.1  | 223.9 | 173.9 | 5.9  |        |      | NA          |
| PLR0110-40  | 156  | 13685 | 2.4 | 11.0450 | 4.2  | 0.6902 | 5.9  | 0.0553 | 4.1 | 0.70 | 346.9 | 13.8 | 532.9 | 24.3 | 1436.9 | 80.5  | 346.9 | 13.8 |        |      | NA          |
| PLR011      |      |       |     |         |      |        |      |        |     |      |       |      |       |      |        |       |       |      |        |      |             |

|               |      |       |     |         |      |        |      |        |     |      |      |     |       |      |         |        |      |     |    |
|---------------|------|-------|-----|---------|------|--------|------|--------|-----|------|------|-----|-------|------|---------|--------|------|-----|----|
| DB01-10 - 83  | 484  | 6980  | 1.7 | 22.7793 | 10.1 | 0.0859 | 10.9 | 0.0142 | 4.0 | 0.37 | 90.9 | 3.6 | 83.7  | 8.7  | -116.3  | 250.2  | 90.9 | 3.6 | NA |
| DB01-10 - 53  | 232  | 4160  | 1.4 | 17.9002 | 20.5 | 0.1096 | 21.0 | 0.0142 | 4.2 | 0.20 | 91.0 | 3.8 | 105.6 | 21.0 | 447.0   | 461.0  | 91.0 | 3.8 | NA |
| DB01-10 - 17  | 383  | 7298  | 3.2 | 19.6482 | 15.1 | 0.1002 | 15.5 | 0.0143 | 3.6 | 0.23 | 91.4 | 3.2 | 97.0  | 14.4 | 236.1   | 350.6  | 91.4 | 3.2 | NA |
| DB01-10 - 42  | 1571 | 700   | 2.3 | 19.7685 | 12.1 | 0.0998 | 12.9 | 0.0143 | 4.3 | 0.33 | 91.6 | 3.9 | 96.6  | 11.9 | 222.0   | 281.5  | 91.6 | 3.9 | NA |
| DB01-10 - 56  | 421  | 5653  | 1.7 | 26.4833 | 36.4 | 0.0745 | 36.5 | 0.0143 | 2.4 | 0.06 | 91.6 | 2.2 | 73.0  | 25.7 | -502.1  | 997.2  | 91.6 | 2.2 | NA |
| DB01-10 - 80  | 666  | 15090 | 2.0 | 20.8467 | 10.4 | 0.0947 | 11.4 | 0.0143 | 4.6 | 0.41 | 91.6 | 4.2 | 91.9  | 10.0 | 97.8    | 246.3  | 91.6 | 4.2 | NA |
| DB01-10 - 96  | 939  | 12445 | 1.6 | 21.2321 | 6.1  | 0.0930 | 6.7  | 0.0143 | 2.6 | 0.39 | 91.6 | 2.4 | 90.3  | 5.8  | 54.2    | 146.5  | 91.6 | 2.4 | NA |
| DB01-10 - 18  | 475  | 7825  | 1.5 | 24.9224 | 18.8 | 0.0793 | 19.0 | 0.0143 | 2.9 | 0.15 | 91.7 | 2.6 | 77.5  | 14.2 | -342.9  | 487.8  | 91.7 | 2.6 | NA |
| DB01-10 - 84  | 295  | 4826  | 1.7 | 23.5574 | 17.2 | 0.0840 | 19.1 | 0.0143 | 8.1 | 0.43 | 91.8 | 7.4 | 81.9  | 15.0 | -199.8  | 434.7  | 91.8 | 7.4 | NA |
| DB01-10 - 6   | 229  | 7238  | 2.1 | 19.4689 | 23.0 | 0.1017 | 23.9 | 0.0144 | 6.4 | 0.27 | 91.9 | 5.9 | 98.4  | 22.4 | 257.2   | 535.5  | 91.9 | 5.9 | NA |
| DB01-10 - 50  | 795  | 10816 | 3.0 | 21.9502 | 8.5  | 0.0904 | 8.7  | 0.0144 | 1.9 | 0.22 | 92.1 | 1.8 | 87.9  | 7.3  | -25.7   | 206.4  | 92.1 | 1.8 | NA |
| DB01-10 - 34  | 488  | 12930 | 5.5 | 21.2845 | 5.7  | 0.0935 | 6.3  | 0.0144 | 2.8 | 0.44 | 92.4 | 2.6 | 90.7  | 5.5  | 48.4    | 136.0  | 92.4 | 2.6 | NA |
| DB01-10 - 27  | 1853 | 23528 | 4.0 | 20.9433 | 3.8  | 0.0951 | 4.2  | 0.0144 | 1.9 | 0.44 | 92.4 | 1.7 | 92.2  | 3.7  | 86.8    | 89.0   | 92.4 | 1.7 | NA |
| DB01-10 - 44  | 341  | 4664  | 1.8 | 24.3896 | 22.4 | 0.0817 | 23.3 | 0.0144 | 6.5 | 0.28 | 92.5 | 6.0 | 79.7  | 17.9 | -287.5  | 576.0  | 92.5 | 6.0 | NA |
| DB01-10 - 65  | 629  | 5835  | 1.6 | 23.4093 | 7.5  | 0.0851 | 8.6  | 0.0145 | 4.1 | 0.48 | 92.5 | 3.7 | 83.0  | 6.8  | -184.0  | 188.1  | 92.5 | 3.7 | NA |
| DB01-10 - 38  | 903  | 9443  | 2.6 | 21.5409 | 6.4  | 0.0929 | 6.7  | 0.0145 | 2.2 | 0.32 | 92.9 | 2.0 | 90.2  | 5.8  | 19.7    | 152.6  | 92.9 | 2.0 | NA |
| DB01-10 - 93  | 390  | 4251  | 3.0 | 22.4289 | 11.6 | 0.0892 | 12.0 | 0.0145 | 3.1 | 0.26 | 92.9 | 2.8 | 86.8  | 10.0 | -78.2   | 285.8  | 92.9 | 2.8 | NA |
| DB01-10 - 62  | 812  | 9644  | 2.6 | 20.4502 | 6.3  | 0.0980 | 6.6  | 0.0145 | 1.9 | 0.29 | 93.0 | 1.7 | 94.9  | 5.9  | 143.0   | 147.6  | 93.0 | 1.7 | NA |
| DB01-10 - 90  | 260  | 3825  | 2.0 | 20.9588 | 24.4 | 0.0957 | 25.0 | 0.0146 | 5.5 | 0.22 | 93.1 | 5.0 | 92.8  | 22.2 | 85.1    | 587.5  | 93.1 | 5.0 | NA |
| DB01-10 - 97  | 332  | 4725  | 1.1 | 18.6726 | 20.1 | 0.1079 | 20.5 | 0.0146 | 3.9 | 0.19 | 93.5 | 3.6 | 104.0 | 20.3 | 352.4   | 458.8  | 93.5 | 3.6 | NA |
| DB01-10 - 79  | 500  | 14089 | 2.3 | 21.2053 | 14.2 | 0.0950 | 16.0 | 0.0146 | 7.3 | 0.46 | 93.5 | 6.8 | 92.1  | 14.1 | 57.2    | 339.5  | 93.5 | 6.8 | NA |
| DB01-10 - 88  | 806  | 37231 | 2.4 | 21.0352 | 12.0 | 0.0958 | 12.4 | 0.0146 | 3.1 | 0.25 | 93.6 | 2.9 | 92.9  | 11.0 | 76.4    | 286.9  | 93.6 | 2.9 | NA |
| DB01-10 - 10  | 415  | 15234 | 1.7 | 21.0783 | 14.4 | 0.0956 | 14.6 | 0.0146 | 2.5 | 0.17 | 93.6 | 2.3 | 92.8  | 12.9 | 71.5    | 343.7  | 93.6 | 2.3 | NA |
| DB01-10 - 82  | 423  | 12836 | 2.2 | 21.2158 | 9.1  | 0.0951 | 9.7  | 0.0146 | 3.5 | 0.36 | 93.7 | 3.3 | 92.3  | 8.6  | 56.1    | 216.6  | 93.7 | 3.3 | NA |
| DB01-10 - 19  | 382  | 6417  | 2.8 | 20.6935 | 14.8 | 0.0976 | 15.2 | 0.0147 | 3.4 | 0.22 | 93.8 | 3.2 | 94.6  | 13.7 | 115.2   | 350.6  | 93.8 | 3.2 | NA |
| DB01-10 - 68  | 1478 | 57907 | 1.0 | 20.0799 | 5.1  | 0.1007 | 5.3  | 0.0147 | 1.2 | 0.23 | 93.9 | 1.1 | 97.4  | 4.9  | 185.7   | 119.7  | 93.9 | 1.1 | NA |
| DB01-10 - 58  | 461  | 10358 | 1.5 | 24.2815 | 17.8 | 0.0833 | 18.0 | 0.0147 | 2.5 | 0.14 | 93.9 | 2.4 | 81.3  | 14.1 | -276.2  | 456.0  | 93.9 | 2.4 | NA |
| DB01-10 - 52  | 578  | 11063 | 3.0 | 22.2806 | 16.2 | 0.0908 | 16.3 | 0.0147 | 1.8 | 0.11 | 93.9 | 1.6 | 88.3  | 13.8 | -62.0   | 397.0  | 93.9 | 1.6 | NA |
| DB01-10 - 100 | 1100 | 10312 | 1.4 | 18.9564 | 9.9  | 0.1069 | 10.2 | 0.0147 | 2.3 | 0.22 | 94.0 | 2.1 | 103.1 | 10.0 | 318.2   | 226.6  | 94.0 | 2.1 | NA |
| DB01-10 - 26  | 1689 | 2959  | 1.2 | 19.2804 | 8.8  | 0.1053 | 9.1  | 0.0147 | 2.4 | 0.26 | 94.2 | 2.2 | 101.6 | 8.8  | 279.5   | 200.8  | 94.2 | 2.2 | NA |
| DB01-10 - 36  | 661  | 12432 | 1.8 | 21.9281 | 15.3 | 0.0926 | 15.5 | 0.0147 | 2.7 | 0.17 | 94.2 | 2.5 | 89.9  | 13.4 | -23.3   | 372.3  | 94.2 | 2.5 | NA |
| DB01-10 - 72  | 323  | 5289  | 2.2 | 21.1763 | 50.5 | 0.0960 | 51.0 | 0.0147 | 6.8 | 0.13 | 94.4 | 6.3 | 93.1  | 45.4 | 60.5    | 1280.5 | 94.4 | 6.3 | NA |
| DB01-10 - 13  | 345  | 4927  | 2.2 | 21.4704 | 21.7 | 0.0948 | 22.1 | 0.0148 | 4.1 | 0.19 | 94.5 | 3.8 | 92.0  | 19.4 | 27.6    | 525.4  | 94.5 | 3.8 | NA |
| DB01-10 - 76  | 661  | 6752  | 2.4 | 23.8723 | 7.5  | 0.0853 | 7.7  | 0.0148 | 1.6 | 0.21 | 94.5 | 1.5 | 83.1  | 6.1  | -233.1  | 189.1  | 94.5 | 1.5 | NA |
| DB01-10 - 70  | 519  | 8345  | 1.8 | 20.9626 | 10.3 | 0.0972 | 10.6 | 0.0148 | 2.4 | 0.23 | 94.6 | 2.3 | 94.2  | 9.5  | 84.6    | 244.9  | 94.6 | 2.3 | NA |
| DB01-10 - 98  | 1195 | 32797 | 3.4 | 21.6793 | 4.7  | 0.0941 | 4.9  | 0.0148 | 1.6 | 0.32 | 94.7 | 1.5 | 91.3  | 4.3  | 4.3     | 112.2  | 94.7 | 1.5 | NA |
| DB01-10 - 32  | 335  | 11959 | 1.5 | 21.6672 | 23.7 | 0.0942 | 24.7 | 0.0148 | 6.6 | 0.27 | 94.7 | 6.2 | 91.4  | 21.6 | 5.6     | 578.7  | 94.7 | 6.2 | NA |
| DB01-10 - 8   | 327  | 10946 | 2.2 | 20.0443 | 22.8 | 0.1018 | 24.6 | 0.0148 | 9.0 | 0.37 | 94.7 | 8.5 | 98.5  | 23.1 | 189.8   | 537.7  | 94.7 | 8.5 | NA |
| DB01-10 - 71  | 855  | 9124  | 4.1 | 21.3593 | 8.6  | 0.0958 | 10.8 | 0.0148 | 6.6 | 0.61 | 94.9 | 6.2 | 92.9  | 9.6  | 40.0    | 206.1  | 94.9 | 6.2 | NA |
| DB01-10 - 61  | 849  | 15608 | 3.0 | 22.8040 | 7.1  | 0.0897 | 8.2  | 0.0148 | 4.2 | 0.51 | 95.0 | 3.9 | 87.2  | 6.9  | -119.0  | 174.6  | 95.0 | 3.9 | NA |
| DB01-10 - 31  | 499  | 7680  | 1.8 | 20.3745 | 12.5 | 0.1005 | 13.3 | 0.0148 | 4.7 | 0.36 | 95.0 | 4.5 | 97.2  | 12.4 | 151.7   | 293.0  | 95.0 | 4.5 | NA |
| DB01-10 - 87  | 315  | 5844  | 2.1 | 19.9979 | 16.7 | 0.1026 | 18.3 | 0.0149 | 7.4 | 0.41 | 95.3 | 7.0 | 99.2  | 17.3 | 195.3   | 390.0  | 95.3 | 7.0 | NA |
| DB01-10 - 66  | 896  | 18743 | 2.1 | 21.5560 | 4.5  | 0.0953 | 4.9  | 0.0149 | 2.1 | 0.43 | 95.3 | 2.0 | 92.4  | 4.4  | 18.0    | 107.2  | 95.3 | 2.0 | NA |
| DB01-10 - 43  | 558  | 8042  | 2.4 | 23.0197 | 14.7 | 0.0893 | 15.1 | 0.0149 | 3.3 | 0.22 | 95.4 | 3.1 | 86.8  | 12.6 | -142.2  | 366.9  | 95.4 | 3.1 | NA |
| DB01-10 - 29  | 1836 | 26011 | 1.5 | 20.4582 | 3.4  | 0.1006 | 3.8  | 0.0149 | 1.9 | 0.49 | 95.5 | 1.8 | 97.4  | 3.6  | 142.1   | 78.9   | 95.5 | 1.8 | NA |
| DB01-10 - 14  | 487  | 7665  | 3.8 | 24.6391 | 16.0 | 0.0836 | 16.4 | 0.0149 | 3.3 | 0.20 | 95.6 | 3.1 | 81.5  | 12.8 | -313.5  | 413.1  | 95.6 | 3.1 | NA |
| DB01-10 - 75  | 350  | 5933  | 2.1 | 21.9018 | 13.0 | 0.0944 | 13.6 | 0.0150 | 3.9 | 0.29 | 96.0 | 3.7 | 91.6  | 11.9 | -20.4   | 316.4  | 96.0 | 3.7 | NA |
| DB01-10 - 15  | 384  | 6627  | 1.9 | 19.2862 | 21.2 | 0.1073 | 21.4 | 0.0150 | 2.5 | 0.12 | 96.0 | 2.4 | 103.5 | 21.0 | 278.8   | 491.2  | 96.0 | 2.4 | NA |
| DB01-10 - 60  | 640  | 12799 | 3.6 | 19.9577 | 11.6 | 0.1040 | 11.8 | 0.0150 | 2.4 | 0.20 | 96.3 | 2.3 | 100.4 | 11.3 | 199.9   | 270.2  | 96.3 | 2.3 | NA |
| DB01-10 - 12  | 106  | 2412  | 1.8 | 39.7827 | 66.6 | 0.0524 | 66.9 | 0.0151 | 5.7 | 0.09 | 96.8 | 5.5 | 51.9  | 33.8 | -1739.6 | 539.2  | 96.8 | 5.5 | NA |
| DB01-10 - 51  | 261  | 7464  | 2.3 | 21.6902 | 22.8 | 0.0962 | 23.0 | 0.0151 | 2.8 | 0.12 | 96.9 | 2.7 | 93.3  | 20.5 | 3.1     | 556.5  | 96.9 | 2.7 | NA |
| DB01-10 - 39  | 823  | 9085  | 2.3 | 22.4252 | 9.1  | 0.0932 | 9.4  | 0.0152 | 2.2 | 0.23 | 96.9 | 2.1 | 90.4  | 8.1  | -77.8   | 223.5  | 96.9 | 2.1 | NA |
| DB01-10 - 25  | 432  | 2626  | 2.1 | 17.5505 | 16.6 | 0.1191 | 16.9 | 0.0152 | 3.1 | 0.18 | 97.0 | 3.0 | 114.2 | 18.3 | 490.7   | 369.0  | 97.0 | 3.0 | NA |
| DB01-10 - 4   | 1850 | 1951  | 2.5 | 20.4640 | 5.9  | 0.1022 | 10.4 | 0.0152 | 8.6 | 0.82 | 97.0 | 8.3 | 98.8  | 9.8  | 141.4   | 138.9  | 97.0 | 8.3 | NA |
| DB01-10 - 67  | 817  | 6038  | 1.1 | 21.0194 | 8.6  | 0.0996 | 9.1  | 0.0152 | 3.1 | 0.34 | 97.2 | 3.0 | 96.4  | 8.4  | 78.2    | 203.5  | 97.2 | 3.0 | NA |
| DB01-10 - 40  | 173  | 4881  | 1.7 | 22.0873 | 37.8 | 0.0948 | 38.4 | 0.0152 | 6.7 | 0.17 | 97.2 | 6.5 | 92.0  | 33.8 | -40.8   | 948.8  | 97.2 | 6.5 | NA |
| DB01-10 - 59  | 683  | 19046 | 1.3 | 21.0797 | 9.3  | 0.0996 | 9.7  | 0.0152 | 2.6 | 0.27 | 97.4 | 2.5 | 96.4  | 8.9  | 71.4    | 222.3  | 97.4 | 2.5 | NA |
| DB01-10 - 1   | 766  | 21168 | 2.7 | 22.6748 | 5.9  | 0.0929 | 6.5  | 0.0153 | 2.6 | 0.41 | 97.7 | 2.6 | 90.2  | 5.6  | -105.0  | 145.9  | 97.7 | 2.6 | NA |
| DB01-10 - 73  | 4190 | 11260 | 3.7 | 20.2170 | 1.6  | 0.1045 | 2.0  | 0.0153 | 1.2 | 0.59 | 98.1 | 1.2 | 101.0 | 1.9  | 169.8   | 37.3   | 98.1 | 1.2 | NA |
| DB01-10 - 3   | 375  | 1497  | 3.6 | 20.0569 | 15.7 | 0.1054 | 16.9 | 0.0153 | 6.3 | 0.37 | 98.1 | 6.1 | 101.8 | 16.4 | 188.4   | 366.5  | 98.1 | 6.1 | NA |
| DB01-10 - 99  | 1478 | 30078 | 2.7 | 20.5054 | 2.8  | 0.1032 | 3.7  | 0.0153 | 2.4 | 0.66 | 98.2 | 2.4 | 99.7  | 3.5  | 136.7   | 64.6   | 98.2 | 2.4 | NA |
| DB01-10 - 30  | 443  | 8482  | 1.5 | 21.4169 | 11.7 | 0.0989 | 12.0 | 0.0154 | 2.6 | 0.21 | 98.3 | 2.5 | 95.8  | 10.9 | 33.5    | 281.0  | 98.3 | 2.5 | NA |
| DB01-10 - 63  | 2531 | 34820 | 0.8 | 20.4371 | 3.8  | 0.1038 | 4.5  | 0.0154 | 2.4 | 0.53 | 98.4 | 2.3 | 100.3 | 4.3  | 144.5   | 89.0   | 98.4 | 2.3 | NA |
| DB01-10 - 5   | 1227 | 8254  | 4.6 | 19.3193 | 4.2  | 0.1099 | 5.0  | 0.0154 | 2.7 | 0.55 | 98.5 | 2.7 | 105.9 | 5.0  | 274.9   | 95.2   | 98.5 | 2.7 | NA |
| DB01-10 - 64  | 665  | 10681 | 2.2 | 19.8649 | 8.4  | 0.1070 | 8.6  | 0.0154 | 2.2 | 0.25 | 98.7 | 2.1 | 103.3 | 8.5  | 210.7   | 194.4  | 98.7 | 2.1 | NA |
| DB01-10 -     |      |       |     |         |      |        |      |        |     |      |      |     |       |      |         |        |      |     |    |



|           |      |        |      |         |      |         |      |        |     |      |        |       |        |      |        |        |        |       |             |
|-----------|------|--------|------|---------|------|---------|------|--------|-----|------|--------|-------|--------|------|--------|--------|--------|-------|-------------|
| BH0210-23 | 344  | 51578  | 3.2  | 17.1484 | 1.7  | 0.6404  | 2.1  | 0.0796 | 1.2 | 0.60 | 494.0  | 5.9   | 502.5  | 8.3  | 541.6  | 36.9   | 494.0  | 5.9   | 91.2        |
| BH0210-57 | 127  | 14855  | 44.2 | 16.6852 | 6.0  | 0.8791  | 7.1  | 0.1064 | 3.9 | 0.55 | 651.7  | 24.2  | 640.5  | 33.8 | 601.1  | 129.1  | 651.7  | 24.2  | 108.4       |
| BH0210-12 | 69   | 35953  | 1.0  | 13.0103 | 3.8  | 1.9422  | 5.2  | 0.1833 | 3.5 | 0.68 | 1084.8 | 35.0  | 1095.7 | 34.8 | 1117.6 | 76.3   | 1117.6 | 76.3  | 97.1        |
| BH0210-33 | 425  | 151090 | 5.2  | 12.7776 | 0.6  | 2.1247  | 1.6  | 0.1969 | 1.5 | 0.92 | 1158.7 | 15.9  | 1156.9 | 11.2 | 1153.5 | 12.2   | 1153.5 | 12.2  | 100.4       |
| BH0210-91 | 104  | 19860  | 0.6  | 12.6440 | 1.7  | 2.1756  | 2.4  | 0.1995 | 1.7 | 0.71 | 1172.7 | 18.1  | 1173.3 | 16.6 | 1174.4 | 33.3   | 1174.4 | 33.3  | 99.9        |
| BH0210-31 | 305  | 13357  | 2.2  | 12.5463 | 1.0  | 1.7307  | 2.0  | 0.1575 | 1.8 | 0.87 | 942.8  | 15.5  | 1020.0 | 13.0 | 1189.7 | 19.7   | 1189.7 | 19.7  | 79.2        |
| BH0210-16 | 728  | 817764 | 4.0  | 12.4391 | 0.8  | 2.1361  | 3.1  | 0.1927 | 3.0 | 0.97 | 1136.0 | 30.9  | 1160.5 | 21.2 | 1206.6 | 15.4   | 1206.6 | 15.4  | 94.1        |
| BH0210-46 | 34   | 9271   | 2.2  | 11.8213 | 7.0  | 2.3320  | 7.4  | 0.1999 | 2.5 | 0.34 | 1175.0 | 26.8  | 1222.1 | 52.6 | 1306.2 | 135.4  | 1306.2 | 135.4 | 90.0        |
| BH0210-35 | 216  | 95505  | 1.9  | 10.9885 | 0.8  | 3.1164  | 2.4  | 0.2484 | 2.2 | 0.94 | 1430.0 | 28.6  | 1436.7 | 18.2 | 1446.7 | 15.6   | 1446.7 | 15.6  | 98.8        |
| BH0210-79 | 130  | 32391  | 1.1  | 10.0096 | 0.7  | 3.9005  | 1.8  | 0.2832 | 1.7 | 0.93 | 1607.3 | 24.1  | 1613.8 | 14.8 | 1622.3 | 12.8   | 1622.3 | 12.8  | 99.1        |
| BH0210-72 | 108  | 98070  | 3.3  | 9.9784  | 1.0  | 4.0202  | 2.7  | 0.2909 | 2.5 | 0.93 | 1646.2 | 35.7  | 1638.3 | 21.6 | 1628.1 | 18.7   | 1628.1 | 18.7  | 101.1       |
| BH0210-29 | 125  | 37262  | 1.3  | 9.8509  | 1.2  | 4.0180  | 3.1  | 0.2871 | 2.8 | 0.92 | 1626.8 | 41.0  | 1637.8 | 25.1 | 1652.0 | 22.0   | 1652.0 | 22.0  | 98.5        |
| BH0210-70 | 42   | 23302  | 0.9  | 9.8506  | 3.9  | 3.9219  | 4.7  | 0.2802 | 2.7 | 0.56 | 1592.3 | 37.5  | 1618.2 | 38.2 | 1652.0 | 72.2   | 1652.0 | 72.2  | 96.4        |
| BH0210-6  | 125  | 54388  | 2.0  | 9.8002  | 1.0  | 3.9656  | 5.5  | 0.2819 | 5.4 | 0.98 | 1600.7 | 76.7  | 1627.2 | 44.6 | 1661.5 | 18.0   | 1661.5 | 18.0  | 96.3        |
| BH0210-21 | 210  | 96073  | 0.9  | 9.7325  | 1.1  | 4.0044  | 2.0  | 0.2827 | 1.7 | 0.85 | 1604.7 | 24.4  | 1635.1 | 16.4 | 1674.3 | 19.5   | 1674.3 | 19.5  | 95.8        |
| BH0210-53 | 165  | 29624  | 2.2  | 9.5540  | 1.0  | 4.1891  | 3.7  | 0.2903 | 3.6 | 0.97 | 1642.9 | 52.3  | 1671.9 | 30.6 | 1708.5 | 17.7   | 1708.5 | 17.7  | 96.2        |
| BH0210-22 | 19   | 8641   | 3.5  | 9.2711  | 6.0  | 4.6918  | 6.6  | 0.3155 | 2.7 | 0.41 | 1767.6 | 42.2  | 1765.8 | 55.2 | 1763.6 | 109.7  | 1763.6 | 109.7 | 100.2       |
| BH0210-98 | 162  | 82296  | 1.2  | 9.2327  | 0.7  | 4.5724  | 1.0  | 0.3062 | 0.7 | 0.71 | 1721.8 | 10.4  | 1744.2 | 8.0  | 1771.2 | 12.3   | 1771.2 | 12.3  | 97.2        |
| BH0210-66 | 55   | 37894  | 2.0  | 9.2036  | 1.4  | 4.7540  | 3.9  | 0.3173 | 3.6 | 0.94 | 1776.7 | 56.3  | 1776.8 | 32.5 | 1776.9 | 24.8   | 1776.9 | 24.8  | 100.0       |
| BH0210-67 | 151  | 69356  | 1.5  | 9.1786  | 1.2  | 5.0299  | 2.5  | 0.3348 | 2.2 | 0.89 | 1861.8 | 36.2  | 1824.4 | 21.4 | 1781.9 | 21.3   | 1781.9 | 21.3  | 104.5       |
| BH0210-25 | 252  | 180244 | 2.6  | 9.1668  | 0.6  | 4.8873  | 2.5  | 0.3249 | 2.5 | 0.98 | 1813.7 | 39.3  | 1800.1 | 21.5 | 1784.2 | 10.3   | 1784.2 | 10.3  | 101.7       |
| BH0210-65 | 190  | 146594 | 5.5  | 9.1666  | 0.5  | 4.9539  | 1.3  | 0.3293 | 1.1 | 0.91 | 1835.2 | 18.2  | 1811.5 | 10.6 | 1784.3 | 9.7    | 1784.3 | 9.7   | 102.9       |
| BH0210-77 | 157  | 88471  | 2.8  | 9.1628  | 1.0  | 4.8764  | 1.9  | 0.3241 | 1.6 | 0.84 | 1809.5 | 24.9  | 1798.2 | 15.9 | 1785.1 | 18.6   | 1785.1 | 18.6  | 101.4       |
| BH0210-14 | 108  | 45139  | 2.4  | 9.1524  | 1.9  | 4.7103  | 2.8  | 0.3127 | 2.1 | 0.75 | 1753.8 | 32.1  | 1769.1 | 23.5 | 1787.1 | 34.0   | 1787.1 | 34.0  | 98.1        |
| BH0210-39 | 668  | 507284 | 4.5  | 9.1470  | 0.5  | 4.7385  | 2.9  | 0.3144 | 2.9 | 0.99 | 1762.1 | 44.5  | 1774.1 | 24.5 | 1788.2 | 8.8    | 1788.2 | 8.8   | 98.5        |
| BH0210-86 | 63   | 25845  | 1.7  | 9.1141  | 2.6  | 4.7300  | 3.7  | 0.3127 | 2.7 | 0.72 | 1753.8 | 41.1  | 1772.6 | 31.2 | 1794.7 | 47.2   | 1794.7 | 47.2  | 97.7        |
| BH0210-7  | 289  | 155568 | 1.8  | 9.0320  | 0.4  | 4.8416  | 2.0  | 0.3172 | 2.0 | 0.98 | 1775.8 | 30.8  | 1792.2 | 17.0 | 1811.2 | 6.5    | 1811.2 | 6.5   | 98.0        |
| BH0210-11 | 156  | 66112  | 2.9  | 8.9028  | 0.8  | 5.0067  | 1.7  | 0.3233 | 1.5 | 0.88 | 1805.7 | 23.6  | 1820.5 | 14.5 | 1837.3 | 15.0   | 1837.3 | 15.0  | 98.3        |
| BH0210-75 | 51   | 35067  | 1.4  | 8.8944  | 2.3  | 5.1805  | 2.8  | 0.3342 | 1.6 | 0.58 | 1858.6 | 26.4  | 1849.4 | 23.9 | 1839.1 | 41.3   | 1839.1 | 41.3  | 101.1       |
| BH0210-82 | 158  | 16729  | 2.6  | 8.8686  | 0.9  | 4.3739  | 6.7  | 0.2813 | 6.6 | 0.99 | 1598.1 | 93.3  | 1707.4 | 55.0 | 1844.3 | 16.2   | 1844.3 | 16.2  | 86.6        |
| BH0210-18 | 233  | 79457  | 1.8  | 8.8104  | 0.6  | 5.2221  | 1.7  | 0.3337 | 1.6 | 0.94 | 1856.2 | 26.5  | 1856.2 | 14.9 | 1856.2 | 10.7   | 1856.2 | 10.7  | 100.0       |
| BH0210-62 | 519  | 425205 | 2.5  | 8.5862  | 0.2  | 5.7218  | 1.1  | 0.3563 | 1.1 | 0.98 | 1964.7 | 19.0  | 1934.7 | 9.9  | 1902.7 | 4.1    | 1902.7 | 4.1   | 103.3       |
| BH0210-28 | 58   | 18448  | 2.2  | 8.5719  | 1.8  | 5.4438  | 2.9  | 0.3384 | 2.3 | 0.79 | 1879.1 | 37.6  | 1891.8 | 25.2 | 1905.6 | 32.7   | 1905.6 | 32.7  | 98.6        |
| BH0210-84 | 71   | 45267  | 1.5  | 8.5250  | 1.2  | 5.6365  | 2.0  | 0.3485 | 1.5 | 0.78 | 1927.4 | 25.8  | 1921.7 | 17.0 | 1915.5 | 22.1   | 1915.5 | 22.1  | 100.6       |
| BH0210-89 | 529  | 269996 | 3.0  | 8.2070  | 0.3  | 5.4068  | 1.8  | 0.3218 | 1.7 | 0.98 | 1798.7 | 27.1  | 1885.9 | 15.0 | 1983.4 | 5.4    | 1983.4 | 5.4   | 90.7        |
| BH0210-94 | 178  | 53686  | 1.4  | 8.1535  | 1.0  | 6.0669  | 1.8  | 0.3588 | 1.6 | 0.84 | 1976.3 | 26.4  | 1985.5 | 16.1 | 1995.1 | 17.8   | 1995.1 | 17.8  | 99.1        |
| BH0210-59 | 71   | 31351  | 2.1  | 7.7415  | 0.9  | 6.8414  | 1.7  | 0.3841 | 1.4 | 0.83 | 2095.5 | 24.8  | 2091.1 | 14.8 | 2086.7 | 16.5   | 2086.7 | 16.5  | 100.4       |
| BH0210-36 | 141  | 180408 | 1.2  | 7.4733  | 4.1  | 5.5244  | 5.2  | 0.2994 | 3.1 | 0.60 | 1688.5 | 46.2  | 1904.4 | 44.5 | 2148.5 | 72.1   | 2148.5 | 72.1  | 78.6        |
| BH0210-13 | 197  | 80892  | 2.1  | 7.2434  | 0.4  | 7.7991  | 2.4  | 0.4097 | 2.4 | 0.99 | 2213.6 | 45.3  | 2208.1 | 22.0 | 2203.0 | 6.3    | 2203.0 | 6.3   | 100.5       |
| BH0210-60 | 193  | 17931  | 1.5  | 6.8030  | 0.5  | 7.9642  | 6.1  | 0.3930 | 6.1 | 1.00 | 2136.5 | 111.5 | 2227.0 | 55.5 | 2311.2 | 8.6    | 2311.2 | 8.6   | 92.4        |
| BH0210-41 | 55   | 30586  | 2.9  | 6.5281  | 1.3  | 8.8559  | 2.2  | 0.4193 | 1.7 | 0.79 | 2257.3 | 32.9  | 2323.3 | 19.9 | 2381.8 | 22.5   | 2381.8 | 22.5  | 94.8        |
| BH0210-73 | 343  | 461965 | 3.2  | 6.2551  | 0.5  | 10.2767 | 1.6  | 0.4662 | 1.5 | 0.96 | 2466.9 | 31.1  | 2460.0 | 14.7 | 2454.3 | 7.8    | 2454.3 | 7.8   | 100.5       |
| BH0210-42 | 40   | 45742  | 0.7  | 6.2059  | 1.8  | 10.4010 | 2.7  | 0.4681 | 2.0 | 0.75 | 2475.4 | 41.8  | 2471.1 | 25.0 | 2467.6 | 30.0   | 2467.6 | 30.0  | 100.3       |
| BH0210-8  | 117  | 73484  | 1.4  | 6.1435  | 0.6  | 10.1647 | 3.8  | 0.4529 | 3.7 | 0.99 | 2408.2 | 74.6  | 2449.9 | 34.7 | 2484.7 | 9.5    | 2484.7 | 9.5   | 96.9        |
| BH0210-49 | 242  | 274602 | 2.5  | 6.0477  | 0.3  | 10.4189 | 1.5  | 0.4570 | 1.5 | 0.98 | 2426.3 | 29.9  | 2472.7 | 14.0 | 2511.1 | 5.1    | 2511.1 | 5.1   | 96.6        |
| BH0210-4  | 253  | 252101 | 3.4  | 5.4552  | 0.3  | 11.6245 | 3.8  | 0.4599 | 3.7 | 1.00 | 2439.2 | 76.1  | 2574.6 | 35.2 | 2683.0 | 5.1    | 2683.0 | 5.1   | 90.9        |
| BH0210-17 | 95   | 66889  | 1.3  | 5.3026  | 0.5  | 13.3083 | 1.8  | 0.5118 | 1.7 | 0.96 | 2664.3 | 36.8  | 2701.8 | 16.5 | 2729.9 | 7.8    | 2729.9 | 7.8   | 97.6        |
| BH0110-86 | 598  | 10046  | 4.6  | 22.2126 | 12.9 | 0.0850  | 14.0 | 0.0137 | 5.4 | 0.38 | 87.7   | 4.7   | 82.9   | 11.1 | -54.6  | 315.6  | 87.7   | 4.7   | NA 1.5, 1.0 |
| BH0110-67 | 216  | 5844   | 2.0  | 22.0187 | 13.8 | 0.0882  | 15.7 | 0.0141 | 7.4 | 0.47 | 90.1   | 6.7   | 85.8   | 12.9 | -33.3  | 336.0  | 90.1   | 6.7   | NA          |
| BH0110-31 | 381  | 7581   | 2.4  | 29.1029 | 25.5 | 0.0669  | 25.9 | 0.0141 | 4.3 | 0.16 | 90.5   | 3.8   | 65.8   | 16.5 | -760.2 | 726.7  | 90.5   | 3.8   | NA          |
| BH0110-6  | 593  | 13136  | 1.9  | 19.6833 | 11.1 | 0.0991  | 12.9 | 0.0141 | 6.6 | 0.51 | 90.6   | 5.9   | 95.9   | 11.8 | 231.9  | 256.4  | 90.6   | 5.9   | NA          |
| BH0110-77 | 296  | 4920   | 2.0  | 26.8815 | 37.9 | 0.0729  | 38.2 | 0.0142 | 5.0 | 0.13 | 91.0   | 4.5   | 71.4   | 26.4 | -542.0 | 1048.2 | 91.0   | 4.5   | NA          |
| BH0110-62 | 1029 | 18103  | 3.3  | 21.2576 | 5.5  | 0.0922  | 5.9  | 0.0142 | 2.0 | 0.35 | 91.0   | 1.9   | 89.6   | 5.0  | 51.3   | 131.5  | 91.0   | 1.9   | NA          |
| BH0110-93 | 276  | 4205   | 1.8  | 24.5689 | 42.9 | 0.0803  | 43.7 | 0.0143 | 8.2 | 0.19 | 91.6   | 7.4   | 78.4   | 33.0 | -306.2 | 1144.2 | 91.6   | 7.4   | NA          |
| BH0110-89 | 581  | 10300  | 3.8  | 21.5986 | 9.4  | 0.0920  | 10.0 | 0.0144 | 3.6 | 0.36 | 92.2   | 3.3   | 89.3   | 8.6  | 13.2   | 225.5  | 92.2   | 3.3   | NA          |
| BH0110-95 | 788  | 10857  | 2.1  | 19.2443 | 8.5  | 0.1033  | 8.8  | 0.0144 | 2.1 | 0.24 | 92.3   | 2.0   | 99.8   | 8.3  | 283.8  | 195.0  | 92.3   | 2.0   | NA          |
| BH0110-25 | 300  | 5307   | 5.9  | 24.4666 | 21.1 | 0.0817  | 21.7 | 0.0145 | 5.3 | 0.24 | 92.8   | 4.9   | 79.8   | 16.7 | -295.6 | 543.3  | 92.8   | 4.9   | NA          |
| BH0110-61 | 1223 | 2260   | 5.6  | 20.3978 | 5.0  | 0.0984  | 5.4  | 0.0146 | 2.1 | 0.39 | 93.2   | 1.9   | 95.3   | 4.9  | 149.0  | 117.2  | 93.2   | 1.9   | NA          |
| BH0110-73 | 399  | 4295   | 1.6  | 25.0751 | 16.6 | 0.0802  | 16.8 | 0.0146 | 2.5 | 0.15 | 93.3   | 2.3   | 78.3   | 12.7 | -358.7 | 432.0  | 93.3   | 2.3   | NA          |
| BH0110-58 | 468  | 7750   | 2.6  | 21.6806 | 25.5 | 0.0928  | 25.9 | 0.0146 | 4.9 | 0.19 | 93.4   | 4.5   | 90.1   | 22.3 | 4.1    | 621.7  | 93.4   | 4.5   | NA          |
| BH0110-78 | 453  | 14407  | 2.3  | 21.5269 | 17.7 | 0.0934  | 17.8 | 0.0146 | 1.9 | 0.11 | 93.4   | 1.8   | 90.7   | 15.4 | 21.2   | 427.7  | 93.4   | 1.8   | NA          |
| BH0110-72 | 294  | 7016   | 1.8  | 22.5889 | 27.8 | 0.0891  | 28.4 | 0.0146 | 5.9 | 0.21 | 93.4   | 5.5   | 86.6   | 23.6 | -95.7  | 693.9  | 93.4   | 5.5   | NA          |
| BH0110-65 | 311  | 13874  | 4.5  | 20.4758 | 20.5 | 0.0985  | 21.5 | 0.0146 | 6.5 | 0.30 | 93.6   | 6.1   | 95.4   | 19.6 | 140.1  | 485.5  | 93.6   | 6.1   | NA          |
| BH0110-24 | 671  | 11271  |      |         |      |         |      |        |     |      |        |       |        |      |        |        |        |       |             |

|              |      |        |      |         |      |         |       |        |     |      |        |       |        |      |        |       |        |       |             |
|--------------|------|--------|------|---------|------|---------|-------|--------|-----|------|--------|-------|--------|------|--------|-------|--------|-------|-------------|
| BH0110-82    | 58   | 16475  | 3.4  | 10.2216 | 3.7  | 3.6074  | 4.1   | 0.2674 | 1.7 | 0.41 | 1527.7 | 23.1  | 1551.2 | 32.7 | 1583.2 | 69.9  | 1583.2 | 69.9  | 96.5        |
| BH0110-21    | 100  | 28931  | 7.2  | 9.9229  | 1.7  | 3.8634  | 2.6   | 0.2780 | 1.9 | 0.75 | 1581.5 | 26.8  | 1606.1 | 20.6 | 1638.4 | 31.3  | 1638.4 | 31.3  | 96.5        |
| BH0110-57    | 228  | 26500  | 4.1  | 9.4031  | 1.3  | 4.4459  | 3.1   | 0.3032 | 2.8 | 0.91 | 1707.2 | 41.8  | 1720.9 | 25.5 | 1737.7 | 23.8  | 1737.7 | 23.8  | 98.2        |
| BH0110-11    | 264  | 68039  | 3.6  | 9.2470  | 0.7  | 4.5382  | 1.9   | 0.3044 | 1.7 | 0.92 | 1712.9 | 26.0  | 1738.0 | 15.6 | 1768.4 | 13.3  | 1768.4 | 13.3  | 96.9        |
| BH0110-33    | 40   | 15283  | 3.1  | 9.2276  | 3.3  | 4.6393  | 8.4   | 0.3105 | 7.7 | 0.92 | 1743.1 | 117.8 | 1756.4 | 70.3 | 1772.2 | 61.1  | 1772.2 | 61.1  | 98.4        |
| BH0110-40    | 275  | 173184 | 2.1  | 9.1460  | 0.5  | 4.9407  | 2.5   | 0.3277 | 2.4 | 0.98 | 1827.4 | 38.4  | 1809.2 | 20.7 | 1788.4 | 8.3   | 1788.4 | 8.3   | 102.2       |
| BH0110-79    | 328  | 114395 | 4.3  | 9.1419  | 0.5  | 4.8163  | 2.6   | 0.3193 | 2.5 | 0.98 | 1786.5 | 39.6  | 1787.7 | 21.7 | 1789.2 | 8.7   | 1789.2 | 8.7   | 99.8        |
| BH0110-55    | 687  | 228166 | 39.3 | 9.1402  | 0.8  | 4.5977  | 2.8   | 0.3048 | 2.7 | 0.96 | 1715.0 | 40.4  | 1748.9 | 23.3 | 1789.5 | 14.6  | 1789.5 | 14.6  | 95.8        |
| BH0110-69    | 238  | 68233  | 1.5  | 9.1265  | 0.7  | 4.7383  | 2.2   | 0.3136 | 2.1 | 0.95 | 1758.6 | 32.1  | 1774.0 | 18.4 | 1792.3 | 12.2  | 1792.3 | 12.2  | 98.1        |
| BH0110-59    | 167  | 42157  | 2.9  | 9.0883  | 1.0  | 4.8920  | 3.9   | 0.3225 | 3.7 | 0.96 | 1801.7 | 58.6  | 1800.9 | 32.6 | 1799.9 | 18.8  | 1799.9 | 18.8  | 100.1       |
| BH0110-23    | 144  | 52018  | 3.9  | 8.9486  | 1.0  | 4.8978  | 2.5   | 0.3179 | 2.3 | 0.93 | 1779.3 | 36.0  | 1801.9 | 21.1 | 1828.0 | 17.2  | 1828.0 | 17.2  | 97.3        |
| BH0110-36    | 63   | 42040  | 1.5  | 8.6468  | 2.1  | 5.2900  | 2.5   | 0.3317 | 1.4 | 0.56 | 1846.8 | 22.2  | 1867.2 | 21.3 | 1890.0 | 37.3  | 1890.0 | 37.3  | 97.7        |
| BH0110-26    | 74   | 29182  | 1.3  | 8.5824  | 1.6  | 5.4993  | 2.4   | 0.3423 | 1.7 | 0.74 | 1897.8 | 28.4  | 1900.5 | 20.2 | 1903.5 | 28.6  | 1903.5 | 28.6  | 99.7        |
| BH0110-70    | 65   | 36976  | 1.5  | 7.8088  | 1.9  | 6.8587  | 3.5   | 0.3884 | 2.9 | 0.83 | 2115.6 | 52.7  | 2093.3 | 31.1 | 2071.5 | 34.2  | 2071.5 | 34.2  | 102.1       |
| BH0110-27    | 161  | 138644 | 1.1  | 7.7620  | 0.7  | 6.9098  | 2.1   | 0.3890 | 2.0 | 0.94 | 2118.2 | 35.7  | 2099.9 | 18.6 | 2082.1 | 12.6  | 2082.1 | 12.6  | 101.7       |
| BH0110-50    | 79   | 39060  | 1.6  | 7.7509  | 0.8  | 6.8574  | 2.9   | 0.3855 | 2.8 | 0.96 | 2101.9 | 49.9  | 2093.2 | 25.6 | 2084.6 | 13.9  | 2084.6 | 13.9  | 100.8       |
| BH0110-98    | 154  | 74348  | 1.9  | 6.8228  | 0.4  | 8.5261  | 2.2   | 0.4219 | 2.2 | 0.98 | 2269.1 | 41.9  | 2288.7 | 20.2 | 2306.3 | 6.9   | 2306.3 | 6.9   | 98.4        |
| BH0110-51    | 119  | 98120  | 1.7  | 6.7171  | 1.0  | 8.9718  | 2.4   | 0.4371 | 2.2 | 0.90 | 2337.5 | 42.3  | 2335.1 | 21.9 | 2333.0 | 17.7  | 2333.0 | 17.7  | 100.2       |
| BH0110-30    | 234  | 146959 | 0.9  | 6.2637  | 0.5  | 10.2611 | 5.3   | 0.4661 | 5.2 | 1.00 | 2466.6 | 107.5 | 2458.6 | 48.8 | 2451.9 | 7.7   | 2451.9 | 7.7   | 100.6       |
| BH0110-102   | 60   | 30853  | 1.9  | 5.7730  | 1.1  | 11.7478 | 3.1   | 0.4919 | 2.9 | 0.94 | 2578.8 | 62.5  | 2584.5 | 29.3 | 2589.0 | 17.8  | 2589.0 | 17.8  | 99.6        |
|              |      |        |      |         |      |         |       |        |     |      |        |       |        |      |        |       |        |       |             |
| EB0210 - 81  | 216  | 4551   | 1.4  | 24.9020 | 30.3 | 0.0725  | 30.7  | 0.0131 | 4.9 | 0.16 | 83.9   | 4.1   | 71.1   | 21.1 | -340.8 | 796.2 | 83.9   | 4.1   | NA 1,2, 0.9 |
| EB0210 - 46  | 485  | 24723  | 1.7  | 20.5349 | 9.6  | 0.0979  | 9.9   | 0.0146 | 2.4 | 0.25 | 93.3   | 2.3   | 94.8   | 9.0  | 133.3  | 225.8 | 93.3   | 2.3   | NA          |
| EB0210 - 40  | 360  | 25894  | 2.9  | 20.1844 | 7.6  | 0.1001  | 7.8   | 0.0146 | 1.9 | 0.24 | 93.8   | 1.7   | 96.8   | 7.2  | 173.6  | 176.9 | 93.8   | 1.7   | NA          |
| EB0210 - 101 | 1138 | 35735  | 2.3  | 20.6301 | 2.1  | 0.0984  | 2.7   | 0.0147 | 1.7 | 0.63 | 94.2   | 1.6   | 95.3   | 2.4  | 122.4  | 48.5  | 94.2   | 1.6   | NA          |
| EB0210 - 39  | 322  | 30940  | 2.6  | 19.6915 | 12.1 | 0.1070  | 12.4  | 0.0153 | 2.5 | 0.20 | 97.8   | 2.4   | 103.2  | 12.1 | 231.0  | 280.2 | 97.8   | 2.4   | NA          |
| EB0210 - 77  | 937  | 32117  | 5.6  | 21.0535 | 5.3  | 0.1008  | 6.6   | 0.0154 | 3.9 | 0.59 | 98.5   | 3.8   | 97.5   | 6.1  | 74.3   | 126.0 | 98.5   | 3.8   | NA          |
| EB0210 - 68  | 793  | 36151  | 1.7  | 20.6885 | 6.1  | 0.1031  | 6.5   | 0.0155 | 2.4 | 0.36 | 98.9   | 2.3   | 99.6   | 6.2  | 115.8  | 143.1 | 98.9   | 2.3   | NA          |
| EB0210 - 92  | 1770 | 51356  | 4.3  | 21.0795 | 2.2  | 0.1014  | 3.2   | 0.0155 | 2.4 | 0.74 | 99.2   | 2.4   | 98.1   | 3.0  | 71.4   | 51.5  | 99.2   | 2.4   | NA          |
| EB0210 - 3   | 525  | 34626  | 1.3  | 19.7057 | 6.3  | 0.1122  | 7.7   | 0.0160 | 4.3 | 0.56 | 102.6  | 4.4   | 108.0  | 7.9  | 229.3  | 146.6 | 102.6  | 4.4   | NA          |
| EB0210 - 22  | 562  | 19313  | 1.4  | 22.5491 | 6.2  | 0.0990  | 6.4   | 0.0162 | 1.7 | 0.26 | 103.6  | 1.7   | 95.9   | 5.9  | -91.3  | 152.8 | 103.6  | 1.7   | NA          |
| EB0210 - 9   | 177  | 3393   | 2.6  | 19.9742 | 26.3 | 0.1135  | 27.1  | 0.0164 | 6.6 | 0.24 | 105.1  | 6.8   | 109.1  | 28.1 | 198.0  | 621.2 | 105.1  | 6.8   | NA          |
| EB0210 - 66  | 593  | 6050   | 2.4  | 20.4463 | 5.7  | 0.1250  | 7.0   | 0.0185 | 4.1 | 0.58 | 118.4  | 4.8   | 119.6  | 7.9  | 143.4  | 132.8 | 118.4  | 4.8   | NA          |
| EB0210 - 70  | 791  | 73570  | 1.5  | 20.3421 | 1.9  | 0.1702  | 4.7   | 0.0251 | 4.3 | 0.92 | 159.9  | 6.9   | 159.6  | 7.0  | 155.4  | 44.2  | 159.9  | 6.9   | NA          |
| EB0210 - 48  | 108  | 7999   | 1.7  | 16.3027 | 11.0 | 0.3144  | 11.4  | 0.0372 | 3.0 | 0.26 | 235.3  | 6.9   | 277.6  | 27.8 | 651.2  | 237.4 | 235.3  | 6.9   | NA          |
| EB0210 - 80  | 424  | 65478  | 2.5  | 18.7087 | 2.4  | 0.4042  | 3.1   | 0.0548 | 1.9 | 0.63 | 344.2  | 6.5   | 344.7  | 9.0  | 348.0  | 54.0  | 344.2  | 6.5   | NA          |
| EB0210 - 23  | 356  | 45649  | 1.6  | 18.6094 | 4.2  | 0.4750  | 4.4   | 0.0641 | 1.1 | 0.26 | 400.5  | 4.4   | 394.6  | 14.3 | 360.0  | 95.6  | 400.5  | 4.4   | NA          |
| EB0210 - 51  | 487  | 78582  | 1.6  | 17.7215 | 1.3  | 0.5544  | 2.8   | 0.0713 | 2.5 | 0.89 | 443.7  | 10.8  | 447.9  | 10.3 | 469.3  | 28.3  | 443.7  | 10.8  | NA          |
| EB0210 - 73  | 63   | 12866  | 2.1  | 16.6517 | 6.2  | 0.7909  | 7.0   | 0.0955 | 3.2 | 0.46 | 588.1  | 18.0  | 591.7  | 31.5 | 605.5  | 135.3 | 588.1  | 18.0  | 97.1        |
| EB0210 - 11  | 693  | 6141   | 1.7  | 16.2036 | 1.5  | 0.9447  | 2.8   | 0.1110 | 2.3 | 0.84 | 678.7  | 14.9  | 675.4  | 13.6 | 664.3  | 32.1  | 678.7  | 14.9  | 102.2       |
| EB0210 - 99  | 574  | 186805 | 55.2 | 15.9309 | 0.9  | 0.9802  | 3.8   | 0.1133 | 3.7 | 0.97 | 691.6  | 24.5  | 693.7  | 19.3 | 700.5  | 19.5  | 691.6  | 24.5  | 98.7        |
| EB0210 - 32  | 164  | 99011  | 1.7  | 15.6499 | 3.4  | 1.0418  | 3.7   | 0.1182 | 1.4 | 0.39 | 720.5  | 9.7   | 724.8  | 19.1 | 738.2  | 72.1  | 720.5  | 9.7   | 97.6        |
| EB0210 - 49  | 342  | 103166 | 1.4  | 13.9144 | 0.9  | 1.6003  | 2.7   | 0.1615 | 2.6 | 0.94 | 965.1  | 23.3  | 970.3  | 17.2 | 982.2  | 18.4  | 982.2  | 18.4  | 98.3        |
| EB0210 - 94  | 299  | 67761  | 14.0 | 13.4954 | 1.1  | 1.7506  | 2.1   | 0.1713 | 1.8 | 0.85 | 1019.5 | 16.6  | 1027.4 | 13.4 | 1044.2 | 21.8  | 1044.2 | 21.8  | 97.6        |
| EB0210 - 50  | 275  | 140248 | 1.8  | 13.4339 | 0.9  | 1.8093  | 3.4   | 0.1763 | 3.3 | 0.97 | 1046.7 | 31.9  | 1048.8 | 22.4 | 1053.4 | 18.1  | 1053.4 | 18.1  | 99.4        |
| EB0210 - 98  | 105  | 20387  | 1.8  | 13.3716 | 2.1  | 1.4100  | 3.8   | 0.1367 | 3.1 | 0.82 | 826.2  | 24.1  | 893.2  | 22.4 | 1062.8 | 43.1  | 1062.8 | 43.1  | 77.7        |
| EB0210 - 31  | 151  | 58339  | 2.5  | 13.2839 | 1.6  | 1.8559  | 3.1   | 0.1788 | 2.7 | 0.86 | 1060.5 | 26.2  | 1065.5 | 20.6 | 1076.0 | 32.6  | 1076.0 | 32.6  | 98.6        |
| EB0210 - 30  | 224  | 352232 | 3.6  | 13.2224 | 1.5  | 1.9045  | 3.7   | 0.1826 | 3.3 | 0.92 | 1081.4 | 33.3  | 1082.7 | 24.3 | 1085.3 | 29.5  | 1085.3 | 29.5  | 99.6        |
| EB0210 - 6   | 242  | 151827 | 2.6  | 13.1519 | 1.0  | 1.9202  | 2.6   | 0.1832 | 2.4 | 0.92 | 1084.2 | 23.9  | 1088.2 | 17.3 | 1096.0 | 20.1  | 1096.0 | 20.1  | 98.9        |
| EB0210 - 78  | 91   | 42221  | 1.9  | 12.8395 | 2.5  | 2.1461  | 9.0   | 0.1998 | 8.7 | 0.96 | 1174.5 | 92.9  | 1163.8 | 62.5 | 1143.9 | 50.0  | 1143.9 | 50.0  | 102.7       |
| EB0210 - 104 | 265  | 95220  | 2.2  | 12.4356 | 1.3  | 2.1918  | 2.1   | 0.1977 | 1.7 | 0.78 | 1162.8 | 17.7  | 1178.4 | 14.8 | 1207.2 | 26.1  | 1207.2 | 26.1  | 96.3        |
| EB0210 - 72  | 74   | 37880  | 3.7  | 11.8769 | 2.8  | 2.6174  | 3.8   | 0.2255 | 2.6 | 0.69 | 1310.7 | 31.0  | 1305.5 | 27.9 | 1297.1 | 53.7  | 1297.1 | 53.7  | 101.0       |
| EB0210 - 26  | 120  | 68268  | 2.2  | 11.5259 | 1.8  | 2.6182  | 2.5   | 0.2189 | 1.7 | 0.69 | 1275.9 | 19.9  | 1305.8 | 18.3 | 1355.2 | 34.9  | 1355.2 | 34.9  | 94.1        |
| EB0210 - 76  | 375  | 237918 | 2.2  | 11.3821 | 0.6  | 2.9731  | 2.1   | 0.2454 | 2.0 | 0.95 | 1414.9 | 25.5  | 1400.8 | 16.0 | 1379.3 | 12.2  | 1379.3 | 12.2  | 102.6       |
| EB0210 - 65  | 189  | 39564  | 2.9  | 11.3616 | 1.8  | 2.8164  | 3.4   | 0.2321 | 2.9 | 0.84 | 1345.4 | 34.7  | 1359.9 | 25.5 | 1382.8 | 35.3  | 1382.8 | 35.3  | 97.3        |
| EB0210 - 63  | 175  | 211023 | 2.0  | 11.3095 | 0.8  | 2.9481  | 2.9   | 0.2418 | 2.8 | 0.96 | 1396.1 | 34.9  | 1394.4 | 21.9 | 1391.6 | 15.0  | 1391.6 | 15.0  | 100.3       |
| EB0210 - 4   | 351  | 260647 | 2.4  | 11.2910 | 0.8  | 3.0404  | 3.5   | 0.2490 | 3.4 | 0.97 | 1433.2 | 43.2  | 1417.8 | 26.5 | 1394.8 | 16.2  | 1394.8 | 16.2  | 102.8       |
| EB0210 - 10  | 156  | 67173  | 1.5  | 11.0794 | 1.4  | 2.9961  | 2.9   | 0.2408 | 2.6 | 0.88 | 1390.6 | 31.9  | 1406.6 | 22.1 | 1431.0 | 26.7  | 1431.0 | 26.7  | 97.2        |
| EB0210 - 100 | 118  | 84456  | 6.0  | 11.0374 | 1.0  | 3.1929  | 3.6   | 0.2556 | 3.4 | 0.96 | 1467.2 | 44.9  | 1455.4 | 27.6 | 1438.2 | 19.7  | 1438.2 | 19.7  | 102.0       |
| EB0210 - 69  | 244  | 101115 | 1.1  | 11.0352 | 1.2  | 3.2204  | 2.9   | 0.2577 | 2.7 | 0.92 | 1478.3 | 35.5  | 1462.1 | 22.8 | 1438.6 | 22.5  | 1438.6 | 22.5  | 102.8       |
| EB0210 - 96  | 115  | 89913  | 1.9  | 11.0330 | 1.3  | 3.1601  | 3.2   | 0.2529 | 2.9 | 0.91 | 1453.2 | 37.7  | 1447.5 | 24.5 | 1439.0 | 24.7  | 1439.0 | 24.7  | 101.0       |
| EB0210 - 54  | 241  | 63138  | 3.0  | 10.9442 | 1.1  | 3.2303  | 2.1   | 0.2564 | 1.8 | 0.84 | 1471.4 | 23.3  | 1464.5 | 16.3 | 1454.4 | 21.6  | 1454.4 | 21.6  | 101.2       |
| EB0210 - 16  | 26   | 15135  | 4.4  | 10.8651 | 8.1  | 3.1766  | 8.4   | 0.2503 | 2.1 | 0.25 | 1440.1 | 27.4  | 1451.5 | 65.0 | 1468.1 | 154.6 | 1468.1 | 154.6 | 98.1        |
| EB0210 - 53  | 117  | 69081  | 2.5  | 10.6483 | 0.9  | 3.5312  | 3.1</ |        |     |      |        |       |        |      |        |       |        |       |             |



|            |      |        |      |         |     |        |     |        |     |      |        |       |        |      |        |       |        |       |       |
|------------|------|--------|------|---------|-----|--------|-----|--------|-----|------|--------|-------|--------|------|--------|-------|--------|-------|-------|
| EB0110-71  | 331  | 79892  | 4.9  | 16.4522 | 1.7 | 0.8615 | 2.6 | 0.1028 | 2.0 | 0.75 | 630.8  | 11.8  | 631.0  | 12.3 | 631.6  | 37.0  | 630.8  | 11.8  | 99.9  |
| EB0110-92  | 99   | 20028  | 3.6  | 14.5210 | 5.0 | 1.4148 | 5.2 | 0.1490 | 1.4 | 0.27 | 895.4  | 11.8  | 895.2  | 30.8 | 894.7  | 103.0 | 895.4  | 11.8  | 100.1 |
| EB0110-52  | 127  | 45498  | 3.1  | 13.9396 | 3.4 | 1.5566 | 4.0 | 0.1574 | 2.2 | 0.54 | 942.2  | 19.1  | 953.1  | 24.9 | 978.5  | 69.0  | 978.5  | 69.0  | 96.3  |
| EB0110-49  | 337  | 122470 | 5.0  | 13.7756 | 1.3 | 1.6673 | 3.1 | 0.1666 | 2.8 | 0.90 | 993.2  | 25.6  | 996.1  | 19.5 | 1002.6 | 26.6  | 1002.6 | 26.6  | 99.1  |
| EB0110-44  | 173  | 55587  | 3.3  | 13.7406 | 1.5 | 1.6632 | 2.5 | 0.1658 | 2.0 | 0.80 | 988.7  | 18.1  | 994.6  | 15.6 | 1007.7 | 30.1  | 1007.7 | 30.1  | 98.1  |
| EB0110-33  | 438  | 126160 | 5.6  | 13.3582 | 0.7 | 1.8013 | 2.3 | 0.1745 | 2.2 | 0.96 | 1036.9 | 20.8  | 1045.9 | 14.8 | 1064.8 | 13.1  | 1064.8 | 13.1  | 97.4  |
| EB0110-47  | 46   | 11060  | 1.8  | 13.3229 | 5.2 | 1.8390 | 5.6 | 0.1777 | 2.1 | 0.38 | 1054.4 | 20.6  | 1059.5 | 37.0 | 1070.1 | 104.9 | 1070.1 | 104.9 | 98.5  |
| EB0110-2   | 106  | 100758 | 5.6  | 13.1745 | 2.6 | 1.9763 | 3.4 | 0.1888 | 2.2 | 0.65 | 1115.1 | 22.8  | 1107.5 | 23.0 | 1092.5 | 51.8  | 1092.5 | 51.8  | 102.1 |
| EB0110-80  | 177  | 80558  | 3.2  | 13.1353 | 2.1 | 1.8722 | 3.3 | 0.1784 | 2.5 | 0.77 | 1058.0 | 24.6  | 1071.3 | 21.6 | 1098.5 | 41.4  | 1098.5 | 41.4  | 96.3  |
| EB0110-24  | 86   | 19558  | 1.7  | 13.0709 | 3.0 | 1.8815 | 3.5 | 0.1784 | 1.7 | 0.50 | 1058.1 | 16.9  | 1074.6 | 23.0 | 1108.3 | 60.0  | 1108.3 | 60.0  | 95.5  |
| EB0110-81  | 124  | 28124  | 5.7  | 13.0000 | 1.9 | 1.8874 | 2.8 | 0.1780 | 2.0 | 0.73 | 1055.8 | 19.6  | 1076.7 | 18.4 | 1119.2 | 37.9  | 1119.2 | 37.9  | 94.3  |
| EB0110-84  | 214  | 31650  | 6.1  | 12.8197 | 1.3 | 2.0081 | 3.3 | 0.1867 | 3.0 | 0.92 | 1103.5 | 30.3  | 1118.3 | 22.0 | 1147.0 | 25.4  | 1147.0 | 25.4  | 96.2  |
| EB0110-21  | 991  | 313593 | 2.2  | 12.6410 | 0.2 | 2.1231 | 4.4 | 0.1946 | 4.4 | 1.00 | 1146.5 | 46.2  | 1156.3 | 30.4 | 1174.8 | 4.6   | 1174.8 | 4.6   | 97.6  |
| EB0110-3   | 523  | 215025 | 3.3  | 12.6166 | 0.5 | 2.1568 | 1.8 | 0.1974 | 1.7 | 0.96 | 1161.1 | 18.1  | 1167.3 | 12.3 | 1178.7 | 9.3   | 1178.7 | 9.3   | 98.5  |
| EB0110-35  | 203  | 62880  | 3.3  | 12.1856 | 0.9 | 2.3752 | 3.0 | 0.2099 | 2.8 | 0.95 | 1228.4 | 31.8  | 1235.2 | 21.3 | 1247.0 | 17.4  | 1247.0 | 17.4  | 98.5  |
| EB0110-4   | 105  | 27338  | 3.9  | 12.1585 | 2.7 | 2.2527 | 3.0 | 0.1986 | 1.2 | 0.40 | 1168.1 | 12.8  | 1197.6 | 21.1 | 1251.4 | 53.7  | 1251.4 | 53.7  | 93.3  |
| EB0110-104 | 815  | 96329  | 6.4  | 12.1064 | 0.4 | 2.4207 | 1.7 | 0.2125 | 1.6 | 0.97 | 1242.4 | 18.1  | 1248.8 | 11.9 | 1259.8 | 8.3   | 1259.8 | 8.3   | 98.6  |
| EB0110-74  | 273  | 138559 | 1.2  | 11.7629 | 0.5 | 2.6290 | 2.2 | 0.2243 | 2.1 | 0.97 | 1304.5 | 25.2  | 1308.8 | 16.1 | 1315.8 | 9.7   | 1315.8 | 9.7   | 99.1  |
| EB0110-78  | 144  | 67024  | 8.4  | 11.6608 | 2.0 | 2.4592 | 2.3 | 0.2080 | 1.1 | 0.48 | 1218.0 | 12.5  | 1260.1 | 16.9 | 1332.7 | 39.7  | 1332.7 | 39.7  | 91.4  |
| EB0110-10  | 1052 | 427241 | 4.0  | 11.6016 | 0.4 | 2.6672 | 4.7 | 0.2244 | 4.7 | 1.00 | 1305.2 | 55.0  | 1319.4 | 34.6 | 1342.5 | 8.6   | 1342.5 | 8.6   | 97.2  |
| EB0110-85  | 96   | 56737  | 2.6  | 11.5472 | 2.4 | 2.3321 | 4.2 | 0.1953 | 3.4 | 0.82 | 1150.1 | 36.1  | 1222.1 | 29.6 | 1351.6 | 45.9  | 1351.6 | 45.9  | 85.1  |
| EB0110-88  | 320  | 9098   | 0.9  | 11.4603 | 1.2 | 2.5688 | 3.5 | 0.2135 | 3.3 | 0.94 | 1247.5 | 36.9  | 1291.8 | 25.4 | 1366.2 | 23.1  | 1366.2 | 23.1  | 91.3  |
| EB0110-90  | 499  | 21723  | 2.4  | 11.3733 | 0.8 | 2.6323 | 5.6 | 0.2171 | 5.5 | 0.99 | 1266.7 | 63.8  | 1309.7 | 41.2 | 1380.8 | 14.7  | 1380.8 | 14.7  | 91.7  |
| EB0110-61  | 268  | 107683 | 5.8  | 11.3711 | 0.7 | 2.7092 | 2.9 | 0.2234 | 2.8 | 0.97 | 1300.0 | 33.1  | 1331.0 | 21.6 | 1381.2 | 14.3  | 1381.2 | 14.3  | 94.1  |
| EB0110-16  | 458  | 206796 | 4.5  | 11.2818 | 0.5 | 2.8077 | 2.9 | 0.2297 | 2.8 | 0.99 | 1333.1 | 34.3  | 1357.6 | 21.6 | 1396.3 | 8.6   | 1396.3 | 8.6   | 95.5  |
| EB0110-79  | 145  | 85466  | 3.0  | 11.0444 | 1.3 | 2.9622 | 3.4 | 0.2373 | 3.2 | 0.92 | 1372.5 | 39.0  | 1398.0 | 26.0 | 1437.0 | 25.6  | 1437.0 | 25.6  | 95.5  |
| EB0110-72  | 398  | 289379 | 4.0  | 11.0369 | 0.5 | 3.0645 | 1.3 | 0.2453 | 1.1 | 0.90 | 1414.2 | 14.4  | 1423.9 | 9.6  | 1438.3 | 10.3  | 1438.3 | 10.3  | 98.3  |
| EB0110-57  | 418  | 109599 | 4.5  | 10.9799 | 0.4 | 2.9719 | 1.5 | 0.2367 | 1.4 | 0.96 | 1369.3 | 17.9  | 1400.5 | 11.5 | 1448.2 | 8.0   | 1448.2 | 8.0   | 94.6  |
| EB0110-59  | 379  | 205912 | 3.3  | 10.8837 | 0.7 | 3.0245 | 2.7 | 0.2387 | 2.6 | 0.96 | 1380.1 | 32.9  | 1413.8 | 21.0 | 1464.9 | 14.1  | 1464.9 | 14.1  | 94.2  |
| EB0110-55  | 83   | 32688  | 1.7  | 10.6765 | 1.9 | 3.1985 | 2.8 | 0.2477 | 2.0 | 0.73 | 1426.4 | 25.9  | 1456.8 | 21.4 | 1501.3 | 35.5  | 1501.3 | 35.5  | 95.0  |
| EB0110-97  | 84   | 35785  | 3.0  | 10.3850 | 1.1 | 3.5097 | 3.4 | 0.2644 | 3.3 | 0.95 | 1512.1 | 44.0  | 1529.4 | 27.1 | 1553.5 | 19.9  | 1553.5 | 19.9  | 97.3  |
| EB0110-7   | 226  | 109438 | 1.8  | 10.2927 | 0.5 | 3.5195 | 2.5 | 0.2627 | 2.4 | 0.98 | 1503.8 | 32.2  | 1531.6 | 19.5 | 1570.2 | 10.2  | 1570.2 | 10.2  | 95.8  |
| EB0110-86  | 380  | 300350 | 2.3  | 10.0941 | 0.7 | 3.6664 | 3.1 | 0.2684 | 3.0 | 0.97 | 1532.8 | 41.3  | 1564.1 | 24.8 | 1606.6 | 13.3  | 1606.6 | 13.3  | 95.4  |
| EB0110-102 | 717  | 116936 | 12.8 | 10.0782 | 0.3 | 3.4567 | 3.3 | 0.2527 | 3.3 | 1.00 | 1452.2 | 43.3  | 1517.4 | 26.3 | 1609.6 | 5.0   | 1609.6 | 5.0   | 90.2  |
| EB0110-65  | 310  | 116912 | 1.7  | 9.9721  | 0.8 | 3.6003 | 3.4 | 0.2604 | 3.2 | 0.97 | 1491.8 | 43.3  | 1549.6 | 26.7 | 1629.3 | 15.6  | 1629.3 | 15.6  | 91.6  |
| EB0110-22  | 103  | 42134  | 2.3  | 9.9380  | 1.4 | 3.8940 | 4.0 | 0.2807 | 3.7 | 0.94 | 1594.7 | 52.6  | 1612.4 | 32.0 | 1635.6 | 25.4  | 1635.6 | 25.4  | 97.5  |
| EB0110-94  | 417  | 160576 | 2.4  | 9.9320  | 0.6 | 3.8983 | 2.1 | 0.2808 | 2.0 | 0.96 | 1595.4 | 28.9  | 1613.3 | 17.1 | 1636.8 | 10.4  | 1636.8 | 10.4  | 97.5  |
| EB0110-62  | 173  | 66410  | 1.9  | 9.8642  | 1.5 | 3.7881 | 6.5 | 0.2710 | 6.3 | 0.97 | 1545.9 | 87.0  | 1590.2 | 52.3 | 1649.5 | 27.7  | 1649.5 | 27.7  | 93.7  |
| EB0110-19  | 227  | 151722 | 1.3  | 9.8419  | 0.6 | 4.0046 | 3.2 | 0.2858 | 3.2 | 0.98 | 1620.7 | 45.4  | 1635.1 | 26.2 | 1653.6 | 11.4  | 1653.6 | 11.4  | 98.0  |
| EB0110-69  | 266  | 186205 | 3.0  | 9.8192  | 0.7 | 4.1520 | 2.6 | 0.2957 | 2.5 | 0.96 | 1669.9 | 37.2  | 1664.6 | 21.6 | 1657.9 | 13.6  | 1657.9 | 13.6  | 100.7 |
| EB0110-51  | 262  | 145715 | 1.9  | 9.7744  | 0.5 | 3.9071 | 1.6 | 0.2770 | 1.5 | 0.95 | 1576.1 | 20.9  | 1615.2 | 12.8 | 1666.4 | 9.5   | 1666.4 | 9.5   | 94.6  |
| EB0110-42  | 123  | 79139  | 3.2  | 9.5734  | 1.0 | 4.5306 | 3.2 | 0.3146 | 3.0 | 0.95 | 1763.2 | 46.2  | 1736.6 | 26.2 | 1704.7 | 18.0  | 1704.7 | 18.0  | 103.4 |
| EB0110-75  | 242  | 177620 | 2.8  | 9.5465  | 0.9 | 4.3605 | 1.9 | 0.3019 | 1.7 | 0.88 | 1700.8 | 24.8  | 1704.9 | 15.6 | 1709.9 | 16.5  | 1709.9 | 16.5  | 99.5  |
| EB0110-77  | 437  | 180717 | 2.2  | 9.5356  | 0.6 | 4.4258 | 2.3 | 0.3061 | 2.2 | 0.97 | 1721.4 | 33.8  | 1717.2 | 19.2 | 1712.0 | 10.6  | 1712.0 | 10.6  | 100.5 |
| EB0110-25  | 752  | 18919  | 0.8  | 9.5272  | 0.7 | 4.1309 | 8.6 | 0.2854 | 8.6 | 1.00 | 1618.7 | 123.0 | 1660.4 | 70.5 | 1713.7 | 12.5  | 1713.7 | 12.5  | 94.5  |
| EB0110-41  | 177  | 82920  | 3.3  | 9.5193  | 1.3 | 4.3113 | 2.5 | 0.2977 | 2.1 | 0.86 | 1679.7 | 31.2  | 1695.5 | 20.3 | 1715.2 | 23.1  | 1715.2 | 23.1  | 97.9  |
| EB0110-96  | 396  | 336412 | 9.0  | 9.5168  | 0.5 | 4.3360 | 2.0 | 0.2993 | 1.9 | 0.97 | 1687.7 | 28.1  | 1700.2 | 16.1 | 1715.7 | 9.0   | 1715.7 | 9.0   | 98.4  |
| EB0110-5   | 131  | 74039  | 2.2  | 9.5166  | 1.1 | 4.2927 | 2.1 | 0.2963 | 1.8 | 0.84 | 1672.9 | 25.8  | 1692.0 | 17.2 | 1715.7 | 20.9  | 1715.7 | 20.9  | 97.5  |
| EB0110-68  | 584  | 439876 | 2.6  | 9.5118  | 0.4 | 4.1749 | 3.0 | 0.2880 | 3.0 | 0.99 | 1631.6 | 43.2  | 1669.1 | 24.8 | 1716.6 | 7.1   | 1716.6 | 7.1   | 95.0  |
| EB0110-58  | 276  | 112156 | 6.7  | 9.5063  | 0.5 | 4.0631 | 2.5 | 0.2801 | 2.4 | 0.98 | 1592.0 | 33.8  | 1646.9 | 20.0 | 1717.7 | 9.6   | 1717.7 | 9.6   | 92.7  |
| EB0110-1   | 207  | 138425 | 4.5  | 9.5059  | 0.7 | 3.9343 | 5.5 | 0.2712 | 5.4 | 0.99 | 1547.1 | 74.5  | 1620.8 | 44.2 | 1717.8 | 12.4  | 1717.8 | 12.4  | 90.1  |
| EB0110-38  | 211  | 93928  | 3.8  | 9.5039  | 0.7 | 4.2897 | 4.9 | 0.2957 | 4.8 | 0.99 | 1669.9 | 71.1  | 1691.4 | 40.2 | 1718.1 | 13.0  | 1718.1 | 13.0  | 97.2  |
| EB0110-6   | 307  | 200994 | 3.1  | 9.4955  | 0.4 | 4.3953 | 3.0 | 0.3027 | 3.0 | 0.99 | 1704.7 | 44.7  | 1711.5 | 24.9 | 1719.8 | 7.0   | 1719.8 | 7.0   | 99.1  |
| EB0110-26  | 426  | 189663 | 3.5  | 9.4714  | 0.6 | 4.4526 | 4.3 | 0.3059 | 4.3 | 0.99 | 1720.3 | 64.4  | 1722.2 | 35.7 | 1724.4 | 10.6  | 1724.4 | 10.6  | 99.8  |
| EB0110-23  | 40   | 27267  | 1.7  | 9.4537  | 3.3 | 4.2846 | 4.3 | 0.2938 | 2.7 | 0.63 | 1660.3 | 40.2  | 1690.4 | 35.7 | 1727.9 | 61.5  | 1727.9 | 61.5  | 96.1  |
| EB0110-73  | 221  | 157821 | 3.9  | 9.4180  | 1.0 | 4.4839 | 2.5 | 0.3063 | 2.3 | 0.92 | 1722.4 | 34.3  | 1728.0 | 20.5 | 1734.8 | 17.7  | 1734.8 | 17.7  | 99.3  |
| EB0110-66  | 251  | 150249 | 6.4  | 9.4174  | 0.8 | 4.3726 | 3.5 | 0.2987 | 3.4 | 0.98 | 1684.6 | 50.7  | 1707.2 | 29.0 | 1734.9 | 14.1  | 1734.9 | 14.1  | 97.1  |
| EB0110-91  | 100  | 57004  | 2.6  | 9.4048  | 2.1 | 3.9994 | 5.4 | 0.2728 | 4.9 | 0.92 | 1555.0 | 68.0  | 1634.1 | 43.6 | 1737.4 | 39.3  | 1737.4 | 39.3  | 89.5  |
| EB0110-9   | 184  | 85924  | 3.1  | 9.3777  | 0.9 | 4.4152 | 2.8 | 0.3003 | 2.7 | 0.95 | 1692.7 | 40.1  | 1715.2 | 23.5 | 1742.7 | 16.3  | 1742.7 | 16.3  | 97.1  |
| EB0110-100 | 197  | 90851  | 2.0  | 9.3210  | 1.7 | 4.8309 | 6.3 | 0.3266 | 6.1 | 0.96 | 1821.8 | 96.2  | 1790.3 | 53.0 | 1753.8 | 31.4  | 1753.8 | 31.4  | 103.9 |
| EB0110-64  | 201  | 80505  | 4.4  | 9.3114  | 2.3 | 4.1292 | 3.9 | 0.2789 | 3.2 | 0.80 | 1585.6 | 44.6  | 1660.1 | 32.2 | 1755.7 | 42.8  | 1755.7 | 42.8  | 90.3  |
| EB0110-36  | 121  | 64938  | 1.9  | 9.2765  | 1.5 | 4.5912 | 4.3 | 0.3089 | 4.0 | 0.94 | 1735.2 | 60.8  | 1747.7 | 35.6 | 1762.5 | 27.5  | 1762.5 | 27.5  | 98.5  |
| EB0110-83  | 182  | 88299  | 6.3  | 9.2488  | 0.6 |        |     |        |     |      |        |       |        |      |        |       |        |       |       |

[illegible]



[illegible]

|              |      |        |      |         |       |         |       |        |      |      |        |       |        |       |         |        |        |       |             |
|--------------|------|--------|------|---------|-------|---------|-------|--------|------|------|--------|-------|--------|-------|---------|--------|--------|-------|-------------|
| EB0510-87    | 936  | 321694 | 32.1 | 9.1487  | 0.3   | 4.6529  | 3.8   | 0.3087 | 3.8  | 1.00 | 1734.5 | 58.4  | 1758.8 | 32.2  | 1787.8  | 5.1    | 1787.8 | 5.1   | 97.0        |
| EB0510 - 10  | 39   | 19424  | 1.7  | 9.1186  | 3.1   | 4.8845  | 5.5   | 0.3230 | 4.6  | 0.83 | 1804.5 | 71.8  | 1799.6 | 46.4  | 1793.8  | 55.9   | 1793.8 | 55.9  | 100.6       |
| EB0510-82    | 286  | 151738 | 2.1  | 9.1130  | 0.6   | 4.6220  | 2.3   | 0.3055 | 2.2  | 0.97 | 1718.5 | 33.7  | 1753.2 | 19.2  | 1795.0  | 10.1   | 1795.0 | 10.1  | 95.7        |
| EB0510-92    | 371  | 436316 | 1.8  | 9.1021  | 0.5   | 4.9501  | 1.7   | 0.3268 | 1.6  | 0.96 | 1822.8 | 25.5  | 1810.8 | 14.1  | 1797.1  | 8.5    | 1797.1 | 8.5   | 101.4       |
| EB0510-50    | 297  | 123903 | 3.5  | 9.0784  | 0.4   | 5.0965  | 3.5   | 0.3356 | 3.5  | 0.99 | 1865.3 | 56.1  | 1835.5 | 29.6  | 1801.9  | 7.8    | 1801.9 | 7.8   | 103.5       |
| EB0510-97    | 195  | 176656 | 4.9  | 8.8381  | 0.9   | 5.1512  | 3.1   | 0.3302 | 3.0  | 0.95 | 1839.3 | 47.9  | 1844.6 | 26.7  | 1850.5  | 17.0   | 1850.5 | 17.0  | 99.4        |
| EB0510 - 13  | 394  | 142507 | 1.4  | 8.7701  | 0.5   | 5.0906  | 2.4   | 0.3238 | 2.3  | 0.98 | 1808.3 | 36.8  | 1834.5 | 20.2  | 1864.5  | 8.6    | 1864.5 | 8.6   | 97.0        |
| EB0510-59    | 63   | 24944  | 1.2  | 8.6538  | 2.8   | 5.3539  | 3.8   | 0.3360 | 2.5  | 0.67 | 1867.5 | 41.0  | 1877.5 | 32.1  | 1888.6  | 49.9   | 1888.6 | 49.9  | 98.9        |
| EB0510-43    | 103  | 97864  | 1.2  | 8.1478  | 0.6   | 6.2977  | 1.1   | 0.3722 | 0.9  | 0.83 | 2039.5 | 15.4  | 2018.1 | 9.3   | 1996.3  | 10.7   | 1996.3 | 10.7  | 102.2       |
| EB0510 - 2   | 1006 | 21777  | 2.4  | 6.3254  | 0.2   | 8.0865  | 1.0   | 0.3710 | 1.0  | 0.98 | 2034.0 | 17.2  | 2240.7 | 9.1   | 2435.3  | 3.2    | 2435.3 | 3.2   | 83.5        |
| EB0510 - 5   | 161  | 135848 | 2.5  | 6.0196  | 0.3   | 10.7717 | 3.7   | 0.4703 | 3.7  | 1.00 | 2484.8 | 75.9  | 2503.6 | 34.3  | 2519.0  | 5.7    | 2519.0 | 5.7   | 98.6        |
| EB0510-46    | 650  | 406260 | 2.1  | 5.6449  | 0.4   | 12.0780 | 2.2   | 0.4945 | 2.2  | 0.99 | 2590.0 | 47.0  | 2610.5 | 20.9  | 2626.4  | 6.0    | 2626.4 | 6.0   | 98.6        |
| EB0510-51    | 388  | 305981 | 4.4  | 5.5603  | 0.4   | 12.9248 | 1.0   | 0.5212 | 0.9  | 0.93 | 2704.3 | 20.0  | 2674.2 | 9.2   | 2651.4  | 6.1    | 2651.4 | 6.1   | 102.0       |
| EB0510 - 7   | 506  | 826937 | 2.8  | 5.3679  | 0.1   | 11.9141 | 1.4   | 0.4638 | 1.4  | 1.00 | 2456.5 | 28.5  | 2597.7 | 13.1  | 2709.7  | 2.2    | 2709.7 | 2.2   | 90.7        |
| EB0510-29    | 417  | 479822 | 2.7  | 5.2682  | 0.4   | 13.3465 | 3.9   | 0.5100 | 3.9  | 1.00 | 2656.4 | 83.9  | 2704.5 | 36.6  | 2740.6  | 6.1    | 2740.6 | 6.1   | 96.9        |
| EB0510-39    | 33   | 30205  | 2.4  | 5.2092  | 0.9   | 13.2219 | 2.5   | 0.4995 | 2.3  | 0.93 | 2611.8 | 50.3  | 2695.6 | 23.8  | 2759.1  | 15.4   | 2759.1 | 15.4  | 94.7        |
| EB0510-95    | 538  | 532074 | 2.5  | 4.2693  | 3.2   | 18.4186 | 3.6   | 0.5703 | 1.7  | 0.47 | 2909.1 | 40.1  | 3011.9 | 35.1  | 3081.2  | 51.3   | 3081.2 | 51.3  | 94.4        |
|              |      |        |      |         |       |         |       |        |      |      |        |       |        |       |         |        |        |       |             |
| EBO410 - 63  | 322  | 5507   | 1.2  | 18.9080 | 17.7  | 0.0817  | 21.6  | 0.0112 | 12.3 | 0.57 | 71.8   | 8.8   | 79.8   | 16.6  | 324.0   | 405.7  | 71.8   | 8.8   | NA 2.0, 1.1 |
| EBO410 - 58  | 99   | 2414   | 1.3  | 18.4071 | 78.3  | 0.0866  | 78.9  | 0.0116 | 9.7  | 0.12 | 74.1   | 7.1   | 84.3   | 63.9  | 384.6   | 2149.9 | 74.1   | 7.1   | NA          |
| EBO410 - 60  | 902  | 34193  | 2.2  | 21.5913 | 14.2  | 0.0831  | 14.4  | 0.0130 | 2.7  | 0.19 | 83.4   | 2.3   | 81.1   | 11.2  | 14.0    | 341.6  | 83.4   | 2.3   | NA          |
| EBO410 - 30  | 132  | 3402   | 2.0  | 33.0687 | 42.2  | 0.0548  | 44.5  | 0.0131 | 14.0 | 0.31 | 84.1   | 11.7  | 54.1   | 23.5  | -1134.5 | 1338.5 | 84.1   | 11.7  | NA          |
| EBO410 - 11  | 170  | 5082   | 1.2  | 11.6774 | 287.4 | 0.1553  | 287.6 | 0.0132 | 10.6 | 0.04 | 84.2   | 8.9   | 146.6  | 414.1 | 1330.0  | 1109.5 | 84.2   | 8.9   | NA          |
| EBO410 - 16  | 1985 | 50088  | 9.5  | 21.3088 | 4.3   | 0.0871  | 4.4   | 0.0135 | 1.0  | 0.22 | 86.2   | 0.8   | 84.8   | 3.6   | 45.6    | 102.2  | 86.2   | 0.8   | NA          |
| EBO410 - 29  | 2062 | 50920  | 8.9  | 20.6510 | 3.5   | 0.0901  | 4.2   | 0.0135 | 2.2  | 0.52 | 86.4   | 1.9   | 87.6   | 3.5   | 120.0   | 83.6   | 86.4   | 1.9   | NA          |
| EBO410 - 2   | 401  | 14869  | 1.6  | 22.7695 | 22.0  | 0.0821  | 22.5  | 0.0136 | 4.8  | 0.21 | 86.8   | 4.2   | 80.1   | 17.3  | -115.2  | 547.6  | 86.8   | 4.2   | NA          |
| EBO410 - 25  | 609  | 11934  | 1.5  | 20.4883 | 15.0  | 0.0914  | 16.6  | 0.0136 | 7.2  | 0.43 | 87.0   | 6.2   | 88.8   | 14.1  | 138.7   | 353.6  | 87.0   | 6.2   | NA          |
| EBO410 - 43  | 156  | 5685   | 2.6  | 17.3104 | 28.1  | 0.1119  | 29.7  | 0.0140 | 9.6  | 0.32 | 89.9   | 8.6   | 107.7  | 30.3  | 521.0   | 627.2  | 89.9   | 8.6   | NA          |
| EBO410 - 17  | 443  | 6470   | 2.1  | 19.5401 | 11.1  | 0.1004  | 12.3  | 0.0142 | 5.2  | 0.42 | 91.1   | 4.7   | 97.2   | 11.4  | 248.8   | 256.5  | 91.1   | 4.7   | NA          |
| EBO410 - 73  | 160  | 24522  | 1.3  | 17.1557 | 8.1   | 0.5583  | 9.4   | 0.0695 | 4.8  | 0.51 | 432.9  | 20.2  | 450.4  | 34.3  | 540.7   | 177.2  | 432.9  | 20.2  | NA          |
| EBO410 - 3   | 90   | 9932   | 1.7  | 17.7521 | 12.6  | 0.5685  | 13.1  | 0.0732 | 3.4  | 0.26 | 455.4  | 15.1  | 457.0  | 48.2  | 465.4   | 280.9  | 455.4  | 15.1  | NA          |
| EBO410 - 76  | 188  | 20819  | 2.3  | 17.8342 | 2.1   | 0.5786  | 4.3   | 0.0748 | 3.7  | 0.87 | 465.3  | 16.8  | 463.6  | 16.0  | 455.2   | 46.4   | 465.3  | 16.8  | NA          |
| EBO410 - 32  | 257  | 44019  | 1.9  | 17.0342 | 4.2   | 0.6098  | 6.2   | 0.0753 | 4.6  | 0.74 | 468.2  | 20.7  | 483.4  | 23.8  | 556.2   | 90.6   | 468.2  | 20.7  | NA          |
| EBO410 - 91  | 125  | 16800  | 2.5  | 18.0242 | 12.6  | 0.5814  | 14.0  | 0.0760 | 6.1  | 0.44 | 472.2  | 27.8  | 465.3  | 52.3  | 431.6   | 282.0  | 472.2  | 27.8  | NA          |
| EBO410 - 85  | 217  | 27393  | 1.9  | 17.0893 | 4.2   | 0.6402  | 4.8   | 0.0793 | 2.3  | 0.48 | 492.2  | 11.0  | 502.4  | 19.0  | 549.2   | 91.7   | 492.2  | 11.0  | 89.6        |
| EBO410 - 74  | 51   | 14899  | 1.6  | 13.6309 | 7.4   | 1.6834  | 8.3   | 0.1664 | 3.9  | 0.46 | 992.4  | 35.5  | 1002.3 | 53.1  | 1024.0  | 149.6  | 1024.0 | 149.6 | 96.9        |
| EBO410 - 81  | 121  | 31938  | 2.3  | 13.6280 | 2.3   | 1.5526  | 3.4   | 0.1535 | 2.6  | 0.75 | 920.3  | 22.1  | 951.5  | 21.2  | 1024.4  | 46.0   | 1024.4 | 46.0  | 89.8        |
| EBO410 - 102 | 218  | 105826 | 2.5  | 13.6121 | 1.5   | 1.6564  | 4.6   | 0.1635 | 4.4  | 0.95 | 976.3  | 40.0  | 992.0  | 29.4  | 1026.8  | 29.6   | 1026.8 | 29.6  | 95.1        |
| EBO410 - 20  | 161  | 68643  | 2.0  | 13.5849 | 2.7   | 1.6277  | 3.6   | 0.1604 | 2.4  | 0.67 | 958.8  | 21.4  | 981.0  | 22.7  | 1030.8  | 54.3   | 1030.8 | 54.3  | 93.0        |
| EBO410 - 71  | 70   | 2305   | 1.6  | 13.5240 | 6.4   | 1.4852  | 8.0   | 0.1457 | 4.8  | 0.60 | 876.7  | 39.1  | 924.4  | 48.7  | 1039.9  | 130.0  | 1039.9 | 130.0 | 84.3        |
| EBO410 - 15  | 364  | 136988 | 2.0  | 13.1954 | 1.2   | 1.7996  | 1.6   | 0.1722 | 1.1  | 0.70 | 1024.4 | 10.7  | 1045.3 | 10.6  | 1089.4  | 23.3   | 1089.4 | 23.3  | 94.0        |
| EBO410 - 75  | 133  | 50577  | 2.7  | 12.7918 | 1.4   | 1.9172  | 4.7   | 0.1779 | 4.5  | 0.95 | 1055.3 | 43.9  | 1087.1 | 31.6  | 1151.3  | 28.5   | 1151.3 | 28.5  | 91.7        |
| EBO410 - 94  | 189  | 137400 | 1.5  | 12.5900 | 2.0   | 2.1754  | 3.1   | 0.1986 | 2.3  | 0.75 | 1168.0 | 24.7  | 1173.2 | 21.4  | 1182.8  | 40.3   | 1182.8 | 40.3  | 98.7        |
| EBO410 - 79  | 127  | 38639  | 10.6 | 12.4156 | 2.3   | 2.2410  | 5.7   | 0.2018 | 5.2  | 0.92 | 1185.0 | 56.8  | 1194.0 | 40.2  | 1210.4  | 45.3   | 1210.4 | 45.3  | 97.9        |
| EBO410 - 7   | 59   | 18826  | 1.1  | 12.0934 | 8.2   | 2.2078  | 9.7   | 0.1936 | 5.3  | 0.54 | 1141.1 | 55.2  | 1183.5 | 68.1  | 1261.9  | 160.0  | 1261.9 | 160.0 | 90.4        |
| EBO410 - 8   | 745  | 158355 | 4.5  | 11.5506 | 0.6   | 1.8932  | 3.4   | 0.1586 | 3.3  | 0.98 | 949.0  | 29.3  | 1078.7 | 22.4  | 1351.0  | 11.5   | 1351.0 | 11.5  | 70.2        |
| EBO410 - 35  | 482  | 189372 | 8.3  | 11.3683 | 0.8   | 2.6429  | 5.7   | 0.2179 | 5.7  | 0.99 | 1270.8 | 65.6  | 1312.7 | 42.3  | 1381.7  | 15.4   | 1381.7 | 15.4  | 92.0        |
| EBO410 - 55  | 445  | 249102 | 1.3  | 11.3111 | 0.6   | 2.6758  | 1.7   | 0.2195 | 1.6  | 0.94 | 1279.3 | 18.9  | 1321.8 | 12.7  | 1391.4  | 10.9   | 1391.4 | 10.9  | 91.9        |
| EBO410 - 24  | 41   | 18530  | 3.1  | 11.2183 | 3.8   | 2.7393  | 4.7   | 0.2229 | 2.6  | 0.57 | 1297.1 | 30.9  | 1339.2 | 34.6  | 1407.2  | 73.5   | 1407.2 | 73.5  | 92.2        |
| EBO410 - 4   | 161  | 81695  | 1.3  | 10.9813 | 1.2   | 3.1842  | 3.8   | 0.2536 | 3.6  | 0.95 | 1457.0 | 47.2  | 1453.3 | 29.4  | 1447.9  | 21.9   | 1447.9 | 21.9  | 100.6       |
| EBO410 - 84  | 167  | 7168   | 1.9  | 10.8899 | 2.2   | 2.8976  | 5.6   | 0.2289 | 5.2  | 0.92 | 1328.5 | 62.6  | 1381.3 | 42.6  | 1463.8  | 41.1   | 1463.8 | 41.1  | 90.8        |
| EBO410 - 18  | 483  | 221953 | 2.4  | 10.7794 | 0.6   | 3.1714  | 1.9   | 0.2479 | 1.8  | 0.95 | 1427.8 | 22.5  | 1450.2 | 14.3  | 1483.2  | 11.3   | 1483.2 | 11.3  | 96.3        |
| EBO410 - 77  | 589  | 433229 | 7.1  | 10.5669 | 0.7   | 2.8012  | 3.8   | 0.2147 | 3.7  | 0.98 | 1253.7 | 42.0  | 1355.9 | 28.2  | 1520.8  | 14.1   | 1520.8 | 14.1  | 82.4        |
| EBO410 - 92  | 998  | 181952 | 5.4  | 10.4988 | 0.3   | 3.3039  | 3.6   | 0.2516 | 3.6  | 1.00 | 1446.6 | 46.0  | 1482.0 | 27.8  | 1533.0  | 6.3    | 1533.0 | 6.3   | 94.4        |
| EBO410 - 49  | 89   | 65777  | 3.6  | 10.1172 | 2.6   | 3.7058  | 4.8   | 0.2719 | 4.0  | 0.84 | 1550.5 | 55.4  | 1572.6 | 38.3  | 1602.4  | 48.4   | 1602.4 | 48.4  | 96.8        |
| EBO410 - 44  | 150  | 76921  | 1.2  | 9.7958  | 1.1   | 3.7534  | 3.9   | 0.2667 | 3.7  | 0.96 | 1523.8 | 50.3  | 1582.8 | 31.0  | 1662.3  | 20.5   | 1662.3 | 20.5  | 91.7        |
| EBO410 - 46  | 199  | 121050 | 1.0  | 9.7830  | 1.0   | 4.0309  | 5.1   | 0.2860 | 5.0  | 0.98 | 1621.5 | 72.2  | 1640.4 | 41.8  | 1664.8  | 18.7   | 1664.8 | 18.7  | 97.4        |
| EBO410 - 72  | 524  | 288207 | 5.4  | 9.6646  | 0.3   | 3.9319  | 7.0   | 0.2756 | 7.0  | 1.00 | 1569.2 | 97.8  | 1620.3 | 57.0  | 1687.3  | 5.8    | 1687.3 | 5.8   | 93.0        |
| EBO410 - 51  | 537  | 394772 | 4.7  | 9.6338  | 0.4   | 4.2848  | 2.1   | 0.2994 | 2.0  | 0.98 | 1688.2 | 30.3  | 1690.4 | 17.2  | 1693.2  | 8.1    | 1693.2 | 8.1   | 99.7        |
| EBO410 - 64  | 290  | 184841 | 4.6  | 9.6289  | 0.6   | 4.0746  | 2.0   | 0.2846 | 1.9  | 0.96 | 1614.2 | 26.8  | 1649.2 | 16.0  | 1694.1  | 10.6   | 1694.1 | 10.6  | 95.3        |
| EBO410 - 22  | 315  | 184879 | 4.7  | 9.6174  | 0.8   | 3.9584  | 8.3   | 0.2761 | 8.2  | 0.99 | 1571.7 | 114.7 | 1625.7 | 67.1  | 1696.3  | 15.3   | 1696.3 | 15.3  | 92.7        |
| EBO410 - 1   | 168  | 70416  | 2.5  | 9.6158  | 1.3   | 4.1731  | 4.2   | 0.2910 | 4.0  | 0.95 | 1646.7 | 57.9  | 1668.7 | 34.2  | 1696.6  | 23.3   | 1696.6 | 23.3  | 97.1        |
| EBO410 - 12  | 259  | 152107 | 1.7  | 9.5922  | 0.5   | 3.9411  | 2.4   | 0.2742 | 2.4  | 0.98 | 1562.0 | 32.9  | 1622.2 | 19.7  | 1701.1  | 9.5    | 1701.1 | 9.5   | 91.8        |
| EBO410 - 103 | 237  | 59521  | 2.7  | 9.5543  | 0.8   | 4.3059  | 3.2   | 0.2984 |      |      |        |       |        |       |         |        |        |       |             |



|              |      |        |     |         |      |        |      |        |     |      |        |      |        |      |        |       |        |      |       |
|--------------|------|--------|-----|---------|------|--------|------|--------|-----|------|--------|------|--------|------|--------|-------|--------|------|-------|
| EB0310 - 25  | 472  | 13481  | 2.6 | 20.5353 | 7.3  | 0.1064 | 7.7  | 0.0159 | 2.5 | 0.32 | 101.4  | 2.5  | 102.7  | 7.5  | 133.2  | 172.1 | 101.4  | 2.5  | NA    |
| EB0310 - 24  | 708  | 29564  | 2.0 | 20.1206 | 3.5  | 0.1690 | 4.5  | 0.0247 | 2.8 | 0.63 | 157.1  | 4.4  | 158.6  | 6.6  | 181.0  | 81.3  | 157.1  | 4.4  | NA    |
| EB0310 - 76  | 519  | 28187  | 3.5 | 19.7296 | 6.1  | 0.1754 | 7.0  | 0.0251 | 3.6 | 0.51 | 159.8  | 5.7  | 164.1  | 10.7 | 226.5  | 140.1 | 159.8  | 5.7  | NA    |
| EB0310 - 19  | 251  | 15750  | 1.9 | 19.7901 | 15.0 | 0.1750 | 16.1 | 0.0251 | 5.6 | 0.35 | 159.9  | 8.9  | 163.8  | 24.3 | 219.5  | 349.7 | 159.9  | 8.9  | NA    |
| EB0310 - 104 | 1004 | 24341  | 1.4 | 19.5611 | 5.3  | 0.1823 | 5.6  | 0.0259 | 1.7 | 0.31 | 164.6  | 2.8  | 170.0  | 8.8  | 246.3  | 122.7 | 164.6  | 2.8  | NA    |
| EB0310 - 46  | 230  | 15878  | 1.0 | 21.2552 | 10.2 | 0.2310 | 10.6 | 0.0356 | 2.8 | 0.26 | 225.6  | 6.2  | 211.0  | 20.2 | 51.7   | 245.0 | 225.6  | 6.2  | NA    |
| EB0310 - 8   | 205  | 1201   | 2.5 | 18.3662 | 24.5 | 0.2704 | 24.5 | 0.0360 | 1.8 | 0.07 | 228.1  | 4.1  | 243.0  | 53.1 | 389.6  | 556.7 | 228.1  | 4.1  | NA    |
| EB0310 - 62  | 377  | 22203  | 1.2 | 19.6090 | 6.3  | 0.2686 | 7.0  | 0.0382 | 2.9 | 0.42 | 241.7  | 6.9  | 241.6  | 14.9 | 240.7  | 145.5 | 241.7  | 6.9  | NA    |
| EB0310 - 23  | 215  | 38005  | 2.3 | 18.4390 | 3.9  | 0.4036 | 5.2  | 0.0540 | 3.5 | 0.67 | 338.8  | 11.4 | 344.2  | 15.2 | 380.7  | 87.3  | 338.8  | 11.4 | NA    |
| EB0310 - 40  | 482  | 67682  | 3.5 | 18.7581 | 3.8  | 0.3967 | 4.2  | 0.0540 | 1.7 | 0.40 | 338.9  | 5.5  | 339.3  | 12.0 | 342.0  | 86.6  | 338.9  | 5.5  | NA    |
| EB0310 - 33  | 389  | 101870 | 2.7 | 18.2727 | 1.8  | 0.4483 | 3.1  | 0.0594 | 2.5 | 0.81 | 372.1  | 9.2  | 376.1  | 9.9  | 401.0  | 41.4  | 372.1  | 9.2  | NA    |
| EB0310 - 55  | 572  | 48546  | 4.1 | 17.9435 | 1.7  | 0.4988 | 3.6  | 0.0649 | 3.2 | 0.88 | 405.4  | 12.6 | 410.9  | 12.3 | 441.6  | 38.6  | 405.4  | 12.6 | NA    |
| EB0310 - 20  | 289  | 19956  | 1.7 | 17.9776 | 3.4  | 0.5161 | 4.1  | 0.0673 | 2.3 | 0.56 | 419.8  | 9.3  | 422.5  | 14.3 | 437.4  | 76.4  | 419.8  | 9.3  | NA    |
| EB0310 - 71  | 504  | 112291 | 1.9 | 17.5501 | 1.9  | 0.5359 | 3.7  | 0.0682 | 3.2 | 0.86 | 425.4  | 13.2 | 435.7  | 13.2 | 490.8  | 41.7  | 425.4  | 13.2 | NA    |
| EB0310 - 44  | 214  | 21055  | 1.3 | 18.2473 | 6.2  | 0.5240 | 6.7  | 0.0694 | 2.4 | 0.37 | 432.2  | 10.2 | 427.8  | 23.2 | 404.2  | 138.8 | 432.2  | 10.2 | NA    |
| EB0310 - 12  | 362  | 80686  | 2.2 | 17.9258 | 3.4  | 0.5567 | 4.5  | 0.0724 | 2.9 | 0.65 | 450.5  | 12.8 | 449.4  | 16.4 | 443.8  | 76.4  | 450.5  | 12.8 | NA    |
| EB0310 - 94  | 517  | 146052 | 3.0 | 17.4968 | 2.6  | 0.5899 | 3.4  | 0.0749 | 2.2 | 0.64 | 465.3  | 9.8  | 470.8  | 12.9 | 497.5  | 58.3  | 465.3  | 9.8  | NA    |
| EB0310 - 84  | 92   | 11063  | 3.1 | 20.7978 | 8.2  | 0.5010 | 10.2 | 0.0756 | 6.0 | 0.59 | 469.7  | 27.4 | 412.4  | 34.5 | 103.3  | 193.9 | 469.7  | 27.4 | NA    |
| EB0310 - 51  | 219  | 42774  | 1.5 | 16.8618 | 2.7  | 0.7963 | 3.9  | 0.0974 | 2.7 | 0.71 | 599.0  | 15.6 | 594.7  | 17.4 | 578.3  | 59.3  | 599.0  | 15.6 | 103.6 |
| EB0310 - 22  | 93   | 40156  | 1.4 | 16.1403 | 6.3  | 0.8470 | 6.5  | 0.0992 | 1.5 | 0.24 | 609.5  | 9.0  | 623.0  | 30.3 | 672.6  | 135.1 | 609.5  | 9.0  | 90.6  |
| EB0310 - 35  | 482  | 77345  | 7.3 | 15.0345 | 1.0  | 0.9556 | 4.5  | 0.1042 | 4.4 | 0.98 | 639.0  | 26.8 | 681.0  | 22.4 | 822.6  | 20.0  | 639.0  | 26.8 | 77.7  |
| EB0310 - 64  | 97   | 29832  | 1.6 | 15.3955 | 5.4  | 1.1233 | 6.2  | 0.1254 | 2.9 | 0.47 | 761.7  | 20.9 | 764.5  | 33.2 | 772.8  | 114.7 | 761.7  | 20.9 | 98.6  |
| EB0310 - 70  | 89   | 29779  | 1.7 | 13.9239 | 4.4  | 1.6834 | 5.0  | 0.1700 | 2.4 | 0.48 | 1012.1 | 22.2 | 1002.3 | 31.7 | 980.8  | 89.2  | 980.8  | 89.2 | 103.2 |
| EB0310 - 60  | 171  | 52722  | 4.6 | 13.7483 | 1.2  | 1.6946 | 1.8  | 0.1690 | 1.4 | 0.76 | 1006.4 | 12.9 | 1006.5 | 11.7 | 1006.6 | 24.3  | 1006.6 | 24.3 | 100.0 |
| EB0310 - 74  | 140  | 41199  | 2.7 | 13.7290 | 2.6  | 1.5225 | 4.8  | 0.1516 | 4.0 | 0.84 | 909.9  | 34.3 | 939.5  | 29.4 | 1009.4 | 52.5  | 1009.4 | 52.5 | 90.1  |
| EB0310 - 30  | 116  | 52617  | 1.7 | 13.6858 | 1.8  | 1.7532 | 3.2  | 0.1740 | 2.6 | 0.82 | 1034.2 | 25.0 | 1028.4 | 20.6 | 1015.8 | 36.8  | 1015.8 | 36.8 | 101.8 |
| EB0310 - 96  | 534  | 157933 | 2.8 | 13.6290 | 0.7  | 1.7583 | 2.7  | 0.1738 | 2.6 | 0.96 | 1033.0 | 24.5 | 1030.2 | 17.2 | 1024.3 | 14.3  | 1024.3 | 14.3 | 100.9 |
| EB0310 - 67  | 339  | 128474 | 0.5 | 13.5184 | 1.1  | 1.7477 | 1.9  | 0.1714 | 1.6 | 0.81 | 1019.6 | 14.7 | 1026.3 | 12.5 | 1040.7 | 23.0  | 1040.7 | 23.0 | 98.0  |
| EB0310 - 85  | 147  | 54992  | 2.5 | 13.4667 | 1.9  | 1.8290 | 3.2  | 0.1786 | 2.6 | 0.80 | 1059.5 | 25.2 | 1055.9 | 21.1 | 1048.5 | 39.0  | 1048.5 | 39.0 | 101.1 |
| EB0310 - 10  | 130  | 37880  | 2.0 | 13.4119 | 1.8  | 1.7787 | 3.0  | 0.1730 | 2.5 | 0.81 | 1028.7 | 23.5 | 1037.7 | 19.8 | 1056.7 | 35.9  | 1056.7 | 35.9 | 97.4  |
| EB0310 - 39  | 85   | 28154  | 2.2 | 13.4057 | 2.6  | 1.6789 | 3.5  | 0.1632 | 2.4 | 0.67 | 974.7  | 21.4 | 1000.6 | 22.3 | 1057.6 | 52.2  | 1057.6 | 52.2 | 92.2  |
| EB0310 - 98  | 291  | 114326 | 2.9 | 13.3494 | 1.2  | 1.8148 | 2.7  | 0.1757 | 2.4 | 0.90 | 1043.5 | 23.5 | 1050.8 | 17.7 | 1066.1 | 23.1  | 1066.1 | 23.1 | 97.9  |
| EB0310 - 41  | 526  | 214844 | 1.5 | 13.3178 | 0.9  | 1.9210 | 2.6  | 0.1855 | 2.4 | 0.93 | 1097.2 | 24.0 | 1088.4 | 17.1 | 1070.9 | 18.5  | 1070.9 | 18.5 | 102.5 |
| EB0310 - 2   | 328  | 117891 | 2.5 | 13.3050 | 0.6  | 1.9137 | 3.3  | 0.1847 | 3.2 | 0.98 | 1092.4 | 32.4 | 1085.9 | 21.9 | 1072.8 | 11.8  | 1072.8 | 11.8 | 101.8 |
| EB0310 - 27  | 54   | 13721  | 0.9 | 13.1140 | 4.5  | 1.8679 | 5.9  | 0.1777 | 3.8 | 0.65 | 1054.2 | 37.2 | 1069.8 | 39.0 | 1101.8 | 89.5  | 1101.8 | 89.5 | 95.7  |
| EB0310 - 14  | 138  | 94177  | 4.9 | 13.0777 | 2.7  | 1.9288 | 3.8  | 0.1829 | 2.7 | 0.70 | 1083.0 | 26.8 | 1091.1 | 25.6 | 1107.3 | 54.3  | 1107.3 | 54.3 | 97.8  |
| EB0310 - 3   | 178  | 64786  | 3.1 | 12.9994 | 1.1  | 2.0290 | 3.0  | 0.1913 | 2.9 | 0.94 | 1128.4 | 29.5 | 1125.3 | 20.7 | 1119.3 | 21.4  | 1119.3 | 21.4 | 100.8 |
| EB0310 - 26  | 478  | 471535 | 5.3 | 12.9382 | 0.7  | 2.0183 | 3.1  | 0.1894 | 3.0 | 0.97 | 1118.1 | 30.9 | 1121.7 | 21.0 | 1128.7 | 14.8  | 1128.7 | 14.8 | 99.1  |
| EB0310 - 34  | 630  | 267810 | 2.4 | 12.8843 | 0.6  | 2.0786 | 2.9  | 0.1942 | 2.8 | 0.98 | 1144.3 | 29.6 | 1141.8 | 19.8 | 1137.0 | 12.4  | 1137.0 | 12.4 | 100.6 |
| EB0310 - 66  | 218  | 80852  | 4.2 | 12.7231 | 1.0  | 2.0588 | 2.9  | 0.1900 | 2.7 | 0.94 | 1121.3 | 28.2 | 1135.2 | 19.9 | 1162.0 | 19.4  | 1162.0 | 19.4 | 96.5  |
| EB0310 - 97  | 244  | 91229  | 2.4 | 12.6448 | 1.5  | 2.1668 | 2.7  | 0.1987 | 2.2 | 0.83 | 1168.4 | 23.4 | 1170.5 | 18.4 | 1174.3 | 29.6  | 1174.3 | 29.6 | 99.5  |
| EB0310 - 42  | 107  | 26890  | 3.1 | 12.5993 | 1.6  | 2.0917 | 3.8  | 0.1911 | 3.4 | 0.90 | 1127.5 | 35.5 | 1146.1 | 26.1 | 1181.4 | 32.1  | 1181.4 | 32.1 | 95.4  |
| EB0310 - 88  | 137  | 68820  | 3.3 | 12.5913 | 2.8  | 2.1594 | 5.1  | 0.1972 | 4.3 | 0.84 | 1160.3 | 45.2 | 1168.1 | 35.3 | 1182.6 | 54.9  | 1182.6 | 54.9 | 98.1  |
| EB0310 - 87  | 257  | 109436 | 2.2 | 12.3124 | 1.0  | 2.2612 | 2.9  | 0.2019 | 2.7 | 0.94 | 1185.6 | 29.4 | 1200.3 | 20.3 | 1226.7 | 18.9  | 1226.7 | 18.9 | 96.7  |
| EB0310 - 43  | 446  | 139967 | 2.5 | 12.3058 | 0.5  | 2.4410 | 2.7  | 0.2179 | 2.7 | 0.98 | 1270.6 | 30.7 | 1254.8 | 19.5 | 1227.8 | 9.8   | 1227.8 | 9.8  | 103.5 |
| EB0310 - 56  | 105  | 69925  | 2.6 | 11.7026 | 2.7  | 2.6190 | 3.8  | 0.2223 | 2.6 | 0.69 | 1294.0 | 30.7 | 1306.0 | 27.9 | 1325.8 | 53.2  | 1325.8 | 53.2 | 97.6  |
| EB0310 - 9   | 40   | 25525  | 2.5 | 11.6176 | 4.1  | 2.6442 | 4.4  | 0.2228 | 1.7 | 0.38 | 1296.6 | 19.6 | 1313.0 | 32.6 | 1339.9 | 79.2  | 1339.9 | 79.2 | 96.8  |
| EB0310 - 83  | 133  | 54795  | 1.8 | 11.5144 | 1.2  | 2.7924 | 2.2  | 0.2332 | 1.9 | 0.85 | 1351.2 | 22.6 | 1353.5 | 16.3 | 1357.1 | 22.4  | 1357.1 | 22.4 | 99.6  |
| EB0310 - 89  | 128  | 61159  | 2.0 | 11.2137 | 0.8  | 3.1165 | 1.8  | 0.2535 | 1.6 | 0.90 | 1456.3 | 21.3 | 1436.8 | 14.0 | 1407.9 | 15.6  | 1407.9 | 15.6 | 103.4 |
| EB0310 - 29  | 209  | 63168  | 2.6 | 11.1978 | 1.0  | 2.9579 | 2.4  | 0.2402 | 2.2 | 0.91 | 1387.9 | 27.7 | 1396.9 | 18.6 | 1410.7 | 19.5  | 1410.7 | 19.5 | 98.4  |
| EB0310 - 102 | 40   | 22633  | 1.3 | 11.1827 | 2.7  | 3.0007 | 3.1  | 0.2434 | 1.4 | 0.46 | 1404.2 | 18.0 | 1407.8 | 23.5 | 1413.2 | 52.5  | 1413.2 | 52.5 | 99.4  |
| EB0310 - 65  | 176  | 51134  | 3.3 | 11.1408 | 1.5  | 3.0109 | 3.1  | 0.2433 | 2.7 | 0.87 | 1403.7 | 34.1 | 1410.4 | 23.6 | 1420.4 | 28.6  | 1420.4 | 28.6 | 98.8  |
| EB0310 - 99  | 180  | 70281  | 1.5 | 11.0720 | 1.1  | 3.2144 | 3.8  | 0.2581 | 3.7 | 0.96 | 1480.2 | 48.7 | 1460.6 | 29.6 | 1432.2 | 20.1  | 1432.2 | 20.1 | 103.4 |
| EB0310 - 16  | 83   | 57901  | 1.8 | 10.9872 | 2.4  | 3.1779 | 3.5  | 0.2532 | 2.5 | 0.72 | 1455.1 | 32.4 | 1451.8 | 26.7 | 1446.9 | 45.8  | 1446.9 | 45.8 | 100.6 |
| EB0310 - 11  | 356  | 176825 | 2.1 | 10.9630 | 0.6  | 3.2786 | 2.5  | 0.2607 | 2.4 | 0.97 | 1493.3 | 32.2 | 1476.0 | 19.4 | 1451.1 | 12.2  | 1451.1 | 12.2 | 102.9 |
| EB0310 - 103 | 303  | 253178 | 2.7 | 10.7938 | 0.8  | 3.3024 | 3.0  | 0.2585 | 2.9 | 0.96 | 1482.3 | 37.8 | 1481.6 | 23.0 | 1480.6 | 14.7  | 1480.6 | 14.7 | 100.1 |
| EB0310 - 72  | 176  | 56190  | 2.5 | 10.0205 | 1.0  | 3.4828 | 2.5  | 0.2531 | 2.3 | 0.92 | 1454.5 | 30.1 | 1523.3 | 19.8 | 1620.3 | 17.8  | 1620.3 | 17.8 | 89.8  |
| EB0310 - 21  | 89   | 92128  | 2.8 | 9.9238  | 1.3  | 3.9179 | 3.1  | 0.2820 | 2.8 | 0.91 | 1601.4 | 39.5 | 1617.4 | 24.8 | 1638.3 | 23.6  | 1638.3 | 23.6 | 97.7  |
| EB0310 - 1   | 106  | 77174  | 2.7 | 9.9041  | 1.8  | 4.1617 | 3.1  | 0.2989 | 2.5 | 0.81 | 1686.1 | 37.3 | 1666.5 | 25.4 | 1642.0 | 33.6  | 1642.0 | 33.6 | 102.7 |
| EB0310 - 63  | 162  | 168722 | 1.2 | 9.7954  | 1.0  | 4.0875 | 1.2  | 0.2904 | 0.8 | 0.64 | 1643.5 | 11.5 | 1651.8 | 10.1 | 1662.4 | 17.7  | 1662.4 | 17.7 | 98.9  |
| EB0310 - 32  | 111  | 55878  | 1.5 | 9.7888  | 1.2  | 4.1525 | 2.3  | 0.2948 | 2.0 | 0.85 | 1665.5 | 28.9 | 1664.7 | 18.9 | 1663.7 | 22.6  | 1663.7 | 22.6 | 100.1 |
| EB0310 - 37  | 181  | 101949 | 2.0 | 9.4845  | 0.9  | 4.3826 | 2.0  | 0.3015 | 1.8 | 0.89 | 1698.6 | 26.3 | 1709.1 | 16.3 | 1721.9 | 16.1  | 1721.9 | 16.1 | 98.6  |
| EB0310 - 81  | 646  | 440533 | 4.0 | 9.3215  | 0.4  | 4.5785 | 2.0  | 0.3095 | 2.0 | 0    |        |      |        |      |        |       |        |      |       |

|            |  |      |       |      |           |     |         |     |        |     |      |        |      |        |      |        |      |        |      |       |
|------------|--|------|-------|------|-----------|-----|---------|-----|--------|-----|------|--------|------|--------|------|--------|------|--------|------|-------|
| FU0108-93  |  | 63   | 8427  | 1.3  | 10.9746   | 2.1 | 3.1462  | 2.6 | 0.2504 | 1.5 | 0.57 | 1440.7 | 19.1 | 1444.1 | 19.9 | 1449.1 | 40.4 | 1449.1 | 40.4 | 99.4  |
| FU0108-11  |  | 403  | 27000 | 2.8  | 10.9227   | 1.4 | 3.0153  | 3.0 | 0.2389 | 2.7 | 0.89 | 1380.8 | 33.2 | 1411.5 | 23.0 | 1458.1 | 26.5 | 1458.1 | 26.5 | 94.7  |
| FU0108-81  |  | 316  | 36912 | 2.5  | 10.8595   | 0.6 | 3.1844  | 0.9 | 0.2508 | 0.6 | 0.69 | 1442.6 | 7.8  | 1453.4 | 6.7  | 1469.1 | 11.8 | 1469.1 | 11.8 | 98.2  |
| FU0108-68  |  | 143  | 21141 | 2.9  | 10.4714   | 1.8 | 3.5607  | 1.8 | 0.2704 | 0.5 | 0.28 | 1542.9 | 7.1  | 1540.8 | 14.6 | 1537.9 | 33.1 | 1537.9 | 33.1 | 100.3 |
| FU0108-18  |  | 127  | 13926 | 0.8  | 9.8974    | 2.1 | 3.8860  | 2.1 | 0.2789 | 0.6 | 0.27 | 1586.1 | 8.0  | 1610.8 | 17.3 | 1643.2 | 38.3 | 1643.2 | 38.3 | 96.5  |
| FU0108-69  |  | 82   | 11001 | 2.1  | 9.7271    | 2.1 | 4.2149  | 2.3 | 0.2974 | 0.9 | 0.41 | 1678.2 | 13.9 | 1676.9 | 18.7 | 1675.4 | 38.3 | 1675.4 | 38.3 | 100.2 |
| FU0108-89  |  | 654  | 39927 | 1.4  | 9.5851    | 2.6 | 3.6439  | 4.6 | 0.2533 | 3.8 | 0.82 | 1455.6 | 48.9 | 1559.2 | 36.5 | 1702.5 | 48.4 | 1702.5 | 48.4 | 85.5  |
| FU0108-12  |  | 93   | 14940 | 1.5  | 9.5586    | 1.6 | 4.3910  | 1.9 | 0.3044 | 1.2 | 0.60 | 1713.1 | 17.5 | 1710.7 | 16.1 | 1707.6 | 28.8 | 1707.6 | 28.8 | 100.3 |
| FU0108-84  |  | 472  | 19842 | 2.3  | 9.4392    | 1.4 | 3.7932  | 2.6 | 0.2597 | 2.2 | 0.85 | 1488.2 | 29.6 | 1591.3 | 21.0 | 1730.7 | 25.0 | 1730.7 | 25.0 | 86.0  |
| FU0108-28  |  | 359  | 42195 | 2.8  | 9.4315    | 0.8 | 4.4867  | 1.2 | 0.3069 | 0.9 | 0.76 | 1725.5 | 13.3 | 1728.5 | 9.7  | 1732.2 | 13.9 | 1732.2 | 13.9 | 99.6  |
| FU0108-74  |  | 309  | 45507 | 2.9  | 9.4225    | 0.7 | 4.4029  | 1.5 | 0.3009 | 1.3 | 0.88 | 1695.7 | 19.8 | 1712.9 | 12.5 | 1733.9 | 13.0 | 1733.9 | 13.0 | 97.8  |
| FU0108-49  |  | 175  | 30612 | 2.4  | 9.3925    | 1.5 | 4.5753  | 1.6 | 0.3117 | 0.6 | 0.36 | 1748.9 | 8.9  | 1744.8 | 13.6 | 1739.8 | 27.9 | 1739.8 | 27.9 | 100.5 |
| FU0108-71  |  | 221  | 30711 | 3.1  | 9.3250    | 1.2 | 4.5833  | 1.2 | 0.3100 | 0.3 | 0.23 | 1740.6 | 4.3  | 1746.2 | 10.0 | 1753.0 | 21.4 | 1753.0 | 21.4 | 99.3  |
| FU0108-44  |  | 338  | 41946 | 2.4  | 9.2172    | 1.2 | 4.5620  | 2.1 | 0.3050 | 1.8 | 0.83 | 1715.9 | 27.0 | 1742.3 | 17.9 | 1774.2 | 21.7 | 1774.2 | 21.7 | 96.7  |
| FU0108-17  |  | 108  | 15096 | 1.5  | 9.2110    | 1.5 | 4.6424  | 1.5 | 0.3101 | 0.3 | 0.17 | 1741.4 | 3.8  | 1756.9 | 12.5 | 1775.5 | 26.9 | 1775.5 | 26.9 | 98.1  |
| FU0108-26  |  | 96   | 17616 | 5.5  | 9.1016    | 1.5 | 4.8629  | 2.7 | 0.3210 | 2.3 | 0.84 | 1794.6 | 36.0 | 1795.9 | 23.0 | 1797.2 | 26.6 | 1797.2 | 26.6 | 99.9  |
| FU0108-42  |  | 208  | 39471 | 2.6  | 9.0004    | 1.1 | 4.9500  | 1.2 | 0.3231 | 0.5 | 0.45 | 1805.0 | 8.5  | 1810.8 | 10.1 | 1817.6 | 19.4 | 1817.6 | 19.4 | 99.3  |
| FU0108-16  |  | 534  | 42888 | 4.6  | 8.9606    | 3.6 | 4.7882  | 4.8 | 0.3112 | 3.2 | 0.67 | 1746.5 | 49.0 | 1782.8 | 40.4 | 1825.6 | 65.0 | 1825.6 | 65.0 | 95.7  |
| FU0108-97  |  | 557  | 34953 | 2.8  | 8.9585    | 0.7 | 4.7860  | 0.8 | 0.3110 | 0.5 | 0.58 | 1745.4 | 7.5  | 1782.4 | 7.0  | 1826.0 | 12.3 | 1826.0 | 12.3 | 95.6  |
| FU0108-98  |  | 170  | 27291 | 2.9  | 8.9165    | 1.4 | 5.0337  | 1.5 | 0.3255 | 0.5 | 0.33 | 1816.6 | 7.8  | 1825.0 | 12.5 | 1834.6 | 25.2 | 1834.6 | 25.2 | 99.0  |
| FU0108-7   |  | 140  | 21921 | 0.9  | 8.4336    | 1.2 | 5.7064  | 1.3 | 0.3490 | 0.6 | 0.46 | 1930.0 | 10.2 | 1932.3 | 11.5 | 1934.8 | 21.1 | 1934.8 | 21.1 | 99.8  |
| FU0108-1   |  | 57   | 9597  | 2.2  | 8.4006    | 1.8 | 5.4255  | 2.6 | 0.3306 | 1.8 | 0.71 | 1841.1 | 29.5 | 1888.9 | 22.3 | 1941.8 | 32.9 | 1941.8 | 32.9 | 94.8  |
| FU0108-64  |  | 213  | 27528 | 3.0  | 8.1972    | 1.3 | 5.6263  | 1.7 | 0.3345 | 1.2 | 0.68 | 1860.1 | 18.9 | 1920.1 | 14.8 | 1985.6 | 22.4 | 1985.6 | 22.4 | 93.7  |
| FU0108-85  |  | 719  | 1788  | 4.4  | 8.0220    | 2.0 | 5.7116  | 2.5 | 0.3323 | 1.6 | 0.62 | 1849.6 | 24.9 | 1933.1 | 21.7 | 2023.9 | 35.1 | 2023.9 | 35.1 | 91.4  |
| FU0108-41  |  | 332  | 53880 | 1.4  | 7.8078    | 1.1 | 6.6754  | 1.9 | 0.3780 | 1.5 | 0.81 | 2067.0 | 26.5 | 2069.4 | 16.4 | 2071.7 | 19.2 | 2071.7 | 19.2 | 99.8  |
| FU0108-100 |  | 1044 | 85179 | 15.9 | 6.7249    | 2.2 | 8.8123  | 2.5 | 0.4298 | 1.2 | 0.48 | 2304.8 | 23.4 | 2318.8 | 23.2 | 2331.0 | 38.4 | 2331.0 | 38.4 | 98.9  |
| FU0108-61  |  | 190  | 37710 | 2.3  | 6.1487    | 2.2 | 10.4960 | 2.7 | 0.4681 | 1.6 | 0.59 | 2475.0 | 33.3 | 2479.6 | 25.3 | 2483.2 | 37.1 | 2483.2 | 37.1 | 99.7  |
| FU0108-37  |  | 92   | 14559 | 2.7  | 5.9433    | 1.5 | 10.1460 | 1.8 | 0.4373 | 1.0 | 0.56 | 2338.7 | 19.6 | 2448.2 | 16.6 | 2540.4 | 25.0 | 2540.4 | 25.0 | 92.1  |
| FU0108-19  |  | 376  | 53607 | 2.2  | 5.6087    | 2.2 | 12.0585 | 3.4 | 0.4905 | 2.6 | 0.76 | 2572.9 | 54.7 | 2609.0 | 31.9 | 2637.1 | 36.7 | 2637.1 | 36.7 | 97.6  |
| FU0108-65  |  | 194  | 24201 | 2.2  | 5.5548    | 1.6 | 12.6073 | 1.9 | 0.5079 | 1.1 | 0.58 | 2647.7 | 24.5 | 2650.8 | 18.3 | 2653.1 | 26.2 | 2653.1 | 26.2 | 99.8  |
| FU0108-80  |  | 95   | 18954 | 1.5  | 5.5524    | 1.3 | 11.6426 | 2.1 | 0.4688 | 1.6 | 0.77 | 2478.5 | 33.1 | 2576.1 | 19.5 | 2653.8 | 22.1 | 2653.8 | 22.1 | 93.4  |
| FU0108-78  |  | 343  | 20703 | 1.1  | 5.5120    | 1.4 | 9.6094  | 4.3 | 0.3842 | 4.1 | 0.95 | 2095.7 | 72.8 | 2398.1 | 39.6 | 2665.9 | 23.0 | 2665.9 | 23.0 | 78.6  |
| FU0108-33  |  | 492  | 79878 | 2.1  | 5.5019    | 1.0 | 11.8921 | 1.2 | 0.4745 | 0.8 | 0.63 | 2503.4 | 16.0 | 2595.9 | 11.5 | 2668.9 | 15.9 | 2668.9 | 15.9 | 93.8  |
| FU0108-29  |  | 339  | 89676 | 3.6  | 5.4910    | 1.4 | 12.5924 | 1.7 | 0.5015 | 1.0 | 0.57 | 2620.2 | 21.3 | 2649.6 | 16.2 | 2672.2 | 23.3 | 2672.2 | 23.3 | 98.1  |
| FU0108-8   |  | 101  | 28188 | 1.6  | 5.4345    | 1.5 | 10.9873 | 4.0 | 0.4331 | 3.8 | 0.93 | 2319.5 | 73.1 | 2522.1 | 37.6 | 2689.3 | 24.8 | 2689.3 | 24.8 | 86.2  |
| FU0108-90  |  | 19   | 5448  | 3.3  | 5.3977    | 2.5 | 13.2018 | 3.5 | 0.5168 | 2.4 | 0.69 | 2685.7 | 52.7 | 2694.2 | 32.9 | 2700.6 | 41.6 | 2700.6 | 41.6 | 99.4  |
| FU0108-20  |  | 224  | 45645 | 3.6  | 5.3839    | 0.8 | 13.1113 | 1.0 | 0.5120 | 0.6 | 0.58 | 2665.0 | 13.1 | 2687.7 | 9.7  | 2704.8 | 13.9 | 2704.8 | 13.9 | 98.5  |
| FU0108-87  |  | 156  | 29793 | 1.5  | 5.3801    | 0.8 | 12.5286 | 2.2 | 0.4889 | 2.0 | 0.93 | 2565.8 | 43.0 | 2644.9 | 20.6 | 2705.9 | 13.5 | 2705.9 | 13.5 | 94.8  |
| FU0108-79  |  | 252  | 34551 | 1.7  | 5.3543    | 0.9 | 13.4074 | 1.2 | 0.5206 | 0.8 | 0.66 | 2701.9 | 17.2 | 2708.8 | 11.2 | 2713.9 | 14.7 | 2713.9 | 14.7 | 99.6  |
| FU0108-99  |  | 151  | 30306 | 1.2  | 5.3198    | 1.8 | 13.6098 | 1.8 | 0.5251 | 0.5 | 0.27 | 2720.8 | 11.1 | 2722.9 | 17.4 | 2724.5 | 29.2 | 2724.5 | 29.2 | 99.9  |
| FU0108-36  |  | 306  | 64218 | 1.3  | 5.2327    | 0.6 | 13.8988 | 0.9 | 0.5275 | 0.7 | 0.72 | 2730.8 | 14.9 | 2742.8 | 8.8  | 2751.7 | 10.5 | 2751.7 | 10.5 | 99.2  |
| FU0108-73  |  | 114  | 20787 | 1.3  | 5.1861    | 1.4 | 14.0738 | 1.8 | 0.5294 | 1.2 | 0.64 | 2738.8 | 25.9 | 2754.7 | 17.1 | 2766.4 | 22.7 | 2766.4 | 22.7 | 99.0  |
| FU0108-52  |  | 75   | 21150 | 0.9  | 5.1737    | 1.5 | 14.0222 | 1.7 | 0.5262 | 0.8 | 0.48 | 2725.2 | 17.8 | 2751.2 | 15.9 | 2770.3 | 24.1 | 2770.3 | 24.1 | 98.4  |
| FU0108-50  |  | 170  | 42048 | 1.8  | 5.1362    | 1.3 | 14.2506 | 3.1 | 0.5308 | 2.8 | 0.91 | 2745.0 | 62.8 | 2766.5 | 29.5 | 2782.2 | 21.6 | 2782.2 | 21.6 | 98.7  |
| FU0108-55  |  | 185  | 47199 | 2.5  | 5.1314    | 1.4 | 14.3797 | 1.5 | 0.5352 | 0.7 | 0.43 | 2763.1 | 14.8 | 2775.1 | 14.4 | 2783.8 | 22.4 | 2783.8 | 22.4 | 99.3  |
| FU0108-59  |  | 165  | 40911 | 1.7  | 5.1172    | 0.7 | 14.3041 | 1.7 | 0.5309 | 1.5 | 0.91 | 2745.1 | 34.4 | 2770.1 | 16.0 | 2788.3 | 11.3 | 2788.3 | 11.3 | 98.5  |
| FU0108-9   |  | 110  | 32649 | 1.4  | 5.0768    | 0.9 | 14.6835 | 1.3 | 0.5406 | 1.0 | 0.76 | 2786.2 | 22.8 | 2795.0 | 12.7 | 2801.3 | 14.2 | 2801.3 | 14.2 | 99.5  |
| FU0108-86  |  | 90   | 25290 | 1.5  | 5.0347    | 0.9 | 14.9694 | 1.2 | 0.5466 | 0.8 | 0.65 | 2811.1 | 17.8 | 2813.3 | 11.5 | 2814.9 | 15.0 | 2814.9 | 15.0 | 99.9  |
| FU0108-31  |  | 42   | 12387 | 0.8  | 5.0310    | 1.0 | 14.9188 | 1.1 | 0.5444 | 0.4 | 0.36 | 2810.7 | 8.9  | 2810.1 | 10.4 | 2816.1 | 16.7 | 2816.1 | 16.7 | 99.5  |
| FU0108-76  |  | 28   | 8262  | 0.9  | 5.0259    | 2.3 | 14.8153 | 2.4 | 0.5400 | 0.9 | 0.36 | 2783.6 | 19.9 | 2803.5 | 23.0 | 2817.8 | 36.8 | 2817.8 | 36.8 | 98.8  |
| FU0108-82  |  | 46   | 16566 | 1.0  | 5.0138    | 1.3 | 15.0328 | 1.3 | 0.5466 | 0.4 | 0.30 | 2811.2 | 9.1  | 2817.3 | 12.7 | 2821.7 | 20.7 | 2821.7 | 20.7 | 99.6  |
| FU0108-88  |  | 216  | 46788 | 3.0  | 4.9811    | 1.7 | 15.1440 | 2.0 | 0.5471 | 1.1 | 0.57 | 2813.1 | 25.8 | 2824.3 | 19.1 | 2832.4 | 26.9 | 2832.4 | 26.9 | 99.3  |
| FU0108-72  |  | 82   | 20172 | 1.8  | 4.9133    | 1.4 | 15.4854 | 1.6 | 0.5518 | 0.7 | 0.47 | 2832.7 | 17.0 | 2845.6 | 15.1 | 2854.7 | 22.8 | 2854.7 | 22.8 | 99.2  |
| FU0108-40  |  | 60   | 14961 | 4.8  | 4.7905    | 1.5 | 16.2977 | 1.6 | 0.5662 | 0.7 | 0.44 | 2892.4 | 16.5 | 2894.4 | 15.5 | 2895.8 | 23.7 | 2895.8 | 23.7 | 99.9  |
| FU0108-56  |  | 84   | 20403 | 0.9  | 4.4709    | 1.2 | 18.0069 | 1.2 | 0.5839 | 0.2 | 0.13 | 2964.6 | 3.8  | 2990.1 | 11.8 | 3007.3 | 19.6 | 3007.3 | 19.6 | 98.6  |
| FU0108-35  |  | 265  | 16878 | 1.4  | 4.1413    | 1.2 | 14.8309 | 1.8 | 0.4455 | 1.4 | 0.74 | 2375.0 | 27.0 | 2804.4 | 17.4 | 3129.7 | 19.4 | 3129.7 | 19.4 | 75.9  |
| FU0108-70  |  | 98   | 26256 | 1.8  | 4.0692    | 1.7 | 18.7307 | 3.2 | 0.5528 | 2.8 | 0.86 | 2836.8 | 63.6 | 3028.1 | 31.1 | 3157.6 | 26.2 | 3157.6 | 26.2 | 89.8  |
| FU0108-54  |  | 192  | 56778 | 1.5  | 3.8356    | 0.6 | 23.5853 | 0.7 | 0.6561 | 0.4 | 0.60 | 3252.0 | 11.0 | 3251.4 | 7.0  | 3251.0 | 9.0  | 3251.0 | 9.0  | 100.0 |
| FU0108-24  |  | 140  | 43812 | 2.0  | 3.6963    | 0.7 | 24.9909 | 0.9 | 0.6700 | 0.5 | 0.60 | 3305.7 | 13.4 | 3307.9 | 8.5  | 3309.2 | 11.0 | 3309.2 | 11.0 | 99.9  |
| FU0108-48  |  | 56   | 22890 | 3.0  | 3.4207    | 2.0 | 27.7338 | 2.1 | 0.6881 | 0.8 | 0.39 | 3375.2 | 21.8 | 3409.7 | 21.0 | 3430.1 | 30.8 | 3430.1 | 30.8 | 98.4  |
| W0108-85   |  | 507  | 5823  | 1.0  | 22.3937   | 3.7 | 0.0701  | 3.8 | 0.0114 | 1.1 | 0.28 | 73.0   | 0.8  | 68.8   | 2.5  | -74.4  | 90.0 | 73.0   | 0.8  | NA    |
| W0108-9    |  | 381  | 5046  | 1.4  | 22.6684</ |     |         |     |        |     |      |        |      |        |      |        |      |        |      |       |



|                                                                                                                                                                                                                        |     |        |     |        |     |         |     |        |     |      |        |      |        |      |        |      |        |      |       |
|------------------------------------------------------------------------------------------------------------------------------------------------------------------------------------------------------------------------|-----|--------|-----|--------|-----|---------|-----|--------|-----|------|--------|------|--------|------|--------|------|--------|------|-------|
| W0108-39                                                                                                                                                                                                               | 451 | 53835  | 4.9 | 9.8308 | 1.1 | 4.0713  | 1.8 | 0.2903 | 1.5 | 0.82 | 1642.9 | 21.5 | 1648.6 | 14.8 | 1655.8 | 19.5 | 1655.8 | 19.5 | 99.2  |
| W0108-49                                                                                                                                                                                                               | 203 | 50652  | 2.2 | 9.7055 | 1.8 | 4.0393  | 3.1 | 0.2843 | 2.6 | 0.82 | 1613.1 | 37.0 | 1642.1 | 25.6 | 1679.5 | 32.9 | 1679.5 | 32.9 | 96.0  |
| W0108-28                                                                                                                                                                                                               | 182 | 51435  | 1.3 | 9.5780 | 1.0 | 4.3632  | 1.4 | 0.3031 | 1.0 | 0.71 | 1706.7 | 14.5 | 1705.4 | 11.2 | 1703.9 | 17.5 | 1703.9 | 17.5 | 100.2 |
| W0108-27                                                                                                                                                                                                               | 864 | 20907  | 0.7 | 9.5510 | 2.0 | 3.9844  | 2.4 | 0.2760 | 1.4 | 0.58 | 1571.2 | 19.7 | 1631.0 | 19.8 | 1709.1 | 36.6 | 1709.1 | 36.6 | 91.9  |
| W0108-57                                                                                                                                                                                                               | 95  | 27576  | 1.6 | 9.4478 | 1.3 | 4.5316  | 1.8 | 0.3105 | 1.3 | 0.73 | 1743.2 | 20.5 | 1736.8 | 15.4 | 1729.0 | 23.3 | 1729.0 | 23.3 | 100.8 |
| W0108-4                                                                                                                                                                                                                | 425 | 38385  | 3.6 | 9.4374 | 1.7 | 4.0660  | 3.5 | 0.2783 | 3.1 | 0.88 | 1582.8 | 43.6 | 1647.5 | 28.8 | 1731.1 | 30.7 | 1731.1 | 30.7 | 91.4  |
| W0108-18                                                                                                                                                                                                               | 137 | 25428  | 1.0 | 9.2564 | 3.9 | 4.6940  | 4.0 | 0.3151 | 0.8 | 0.20 | 1765.9 | 12.5 | 1766.2 | 33.7 | 1766.5 | 72.0 | 1766.5 | 72.0 | 100.0 |
| W0108-8                                                                                                                                                                                                                | 183 | 63864  | 2.9 | 9.1962 | 1.6 | 4.7916  | 1.7 | 0.3196 | 0.6 | 0.33 | 1787.7 | 8.7  | 1783.4 | 14.2 | 1778.4 | 29.2 | 1778.4 | 29.2 | 100.5 |
| W0108-1                                                                                                                                                                                                                | 170 | 62001  | 3.0 | 9.1949 | 1.8 | 4.7212  | 2.3 | 0.3148 | 1.5 | 0.63 | 1764.5 | 22.4 | 1771.0 | 19.3 | 1778.7 | 32.7 | 1778.7 | 32.7 | 99.2  |
| W0108-81                                                                                                                                                                                                               | 76  | 25431  | 2.3 | 9.0683 | 0.7 | 4.9441  | 0.9 | 0.3252 | 0.5 | 0.60 | 1814.9 | 8.2  | 1809.8 | 7.3  | 1803.9 | 12.6 | 1803.9 | 12.6 | 100.6 |
| W0108-36                                                                                                                                                                                                               | 35  | 11823  | 1.1 | 9.0422 | 0.9 | 4.9340  | 1.5 | 0.3236 | 1.2 | 0.80 | 1807.1 | 18.4 | 1808.1 | 12.3 | 1809.2 | 15.9 | 1809.2 | 15.9 | 99.9  |
| W0108-67                                                                                                                                                                                                               | 355 | 52038  | 3.0 | 8.9997 | 1.0 | 4.9424  | 1.5 | 0.3226 | 1.0 | 0.72 | 1802.4 | 16.4 | 1809.5 | 12.3 | 1817.7 | 18.4 | 1817.7 | 18.4 | 99.2  |
| W0108-45                                                                                                                                                                                                               | 415 | 63411  | 3.2 | 8.8708 | 0.9 | 4.6608  | 1.7 | 0.2999 | 1.5 | 0.85 | 1690.6 | 21.7 | 1760.2 | 14.3 | 1843.9 | 16.3 | 1843.9 | 16.3 | 91.7  |
| W0108-76                                                                                                                                                                                                               | 193 | 60669  | 0.8 | 8.7860 | 0.4 | 5.1834  | 0.8 | 0.3303 | 0.8 | 0.91 | 1839.8 | 12.3 | 1849.9 | 7.2  | 1861.2 | 6.3  | 1861.2 | 6.3  | 98.9  |
| W0108-22                                                                                                                                                                                                               | 48  | 23385  | 1.1 | 8.7700 | 1.3 | 5.2910  | 2.3 | 0.3365 | 1.9 | 0.82 | 1870.0 | 31.0 | 1867.4 | 19.8 | 1864.5 | 23.9 | 1864.5 | 23.9 | 100.3 |
| W0108-14                                                                                                                                                                                                               | 268 | 73869  | 1.7 | 8.7595 | 1.0 | 5.1609  | 1.7 | 0.3279 | 1.4 | 0.83 | 1828.0 | 22.6 | 1846.2 | 14.5 | 1866.7 | 17.1 | 1866.7 | 17.1 | 97.9  |
| W0108-82                                                                                                                                                                                                               | 149 | 56472  | 1.0 | 8.5399 | 1.6 | 5.5705  | 1.8 | 0.3450 | 0.9 | 0.49 | 1910.8 | 14.6 | 1911.6 | 15.4 | 1912.4 | 28.0 | 1912.4 | 28.0 | 99.9  |
| W0108-23                                                                                                                                                                                                               | 177 | 62937  | 3.1 | 8.5370 | 1.9 | 5.5593  | 1.9 | 0.3442 | 0.4 | 0.20 | 1906.9 | 6.3  | 1909.8 | 16.3 | 1913.0 | 33.2 | 1913.0 | 33.2 | 99.7  |
| W0108-58                                                                                                                                                                                                               | 315 | 111390 | 2.4 | 8.5250 | 1.2 | 5.4789  | 1.3 | 0.3388 | 0.5 | 0.40 | 1880.7 | 8.2  | 1897.3 | 10.8 | 1915.5 | 20.8 | 1915.5 | 20.8 | 98.2  |
| W0108-26                                                                                                                                                                                                               | 167 | 59364  | 1.5 | 8.4844 | 1.4 | 5.5642  | 1.9 | 0.3424 | 1.2 | 0.65 | 1898.1 | 19.9 | 1910.6 | 16.1 | 1924.1 | 25.5 | 1924.1 | 25.5 | 98.7  |
| W0108-66                                                                                                                                                                                                               | 413 | 112803 | 2.2 | 8.0045 | 1.5 | 6.2194  | 1.8 | 0.3611 | 1.0 | 0.55 | 1987.2 | 17.4 | 2007.2 | 16.2 | 2027.8 | 27.3 | 2027.8 | 27.3 | 98.0  |
| W0108-47                                                                                                                                                                                                               | 62  | 23895  | 0.7 | 7.8831 | 1.9 | 6.4871  | 2.0 | 0.3709 | 0.6 | 0.29 | 2033.6 | 10.3 | 2044.1 | 17.8 | 2054.8 | 34.1 | 2054.8 | 34.1 | 99.0  |
| W0108-68                                                                                                                                                                                                               | 104 | 36708  | 1.6 | 7.8319 | 1.2 | 6.7458  | 1.7 | 0.3832 | 1.3 | 0.74 | 2091.1 | 22.7 | 2078.6 | 15.2 | 2066.3 | 20.3 | 2066.3 | 20.3 | 101.2 |
| W0108-75                                                                                                                                                                                                               | 34  | 13524  | 0.5 | 7.7987 | 1.2 | 6.6822  | 1.6 | 0.3780 | 1.1 | 0.70 | 2066.7 | 20.2 | 2070.3 | 14.4 | 2073.8 | 20.5 | 2073.8 | 20.5 | 99.7  |
| W0108-41                                                                                                                                                                                                               | 293 | 101901 | 1.7 | 7.3955 | 5.1 | 6.3939  | 6.3 | 0.3430 | 3.7 | 0.58 | 1900.9 | 60.9 | 2031.4 | 55.7 | 2166.8 | 89.7 | 2166.8 | 89.7 | 87.7  |
| W0108-91                                                                                                                                                                                                               | 470 | 128028 | 3.1 | 6.2197 | 0.7 | 10.2312 | 1.2 | 0.4615 | 1.0 | 0.80 | 2446.3 | 19.3 | 2455.9 | 11.0 | 2463.9 | 12.0 | 2463.9 | 12.0 | 99.3  |
| W0108-52                                                                                                                                                                                                               | 273 | 91224  | 2.3 | 6.1158 | 1.8 | 10.5013 | 2.1 | 0.4658 | 1.0 | 0.46 | 2465.1 | 19.5 | 2480.0 | 19.1 | 2492.3 | 30.8 | 2492.3 | 30.8 | 98.9  |
| W0108-12                                                                                                                                                                                                               | 298 | 81042  | 0.9 | 5.7637 | 1.0 | 11.5701 | 1.4 | 0.4837 | 1.1 | 0.74 | 2543.2 | 22.5 | 2570.3 | 13.4 | 2591.7 | 16.0 | 2591.7 | 16.0 | 98.1  |
| W0108-43                                                                                                                                                                                                               | 71  | 27465  | 2.0 | 5.5058 | 1.7 | 12.8632 | 2.0 | 0.5136 | 1.2 | 0.59 | 2672.2 | 26.3 | 2669.7 | 19.2 | 2667.8 | 27.3 | 2667.8 | 27.3 | 100.2 |
| W0108-3                                                                                                                                                                                                                | 99  | 65400  | 1.9 | 5.1243 | 1.4 | 14.5004 | 2.0 | 0.5389 | 1.4 | 0.69 | 2778.9 | 30.9 | 2783.0 | 18.9 | 2786.0 | 23.6 | 2786.0 | 23.6 | 99.7  |
| W0108-77                                                                                                                                                                                                               | 181 | 91239  | 1.3 | 5.1180 | 0.7 | 14.6032 | 1.1 | 0.5421 | 0.9 | 0.79 | 2792.1 | 20.6 | 2789.7 | 10.9 | 2788.1 | 11.5 | 2788.1 | 11.5 | 100.1 |
| W0108-55                                                                                                                                                                                                               | 362 | 119628 | 0.7 | 5.0783 | 2.6 | 14.7466 | 3.0 | 0.5431 | 1.4 | 0.48 | 2796.6 | 32.0 | 2799.0 | 28.2 | 2800.8 | 42.7 | 2800.8 | 42.7 | 99.8  |
| W0108-94                                                                                                                                                                                                               | 206 | 92019  | 1.0 | 5.0503 | 1.1 | 14.7983 | 1.3 | 0.5420 | 0.7 | 0.55 | 2792.0 | 15.9 | 2802.4 | 12.2 | 2809.8 | 17.5 | 2809.8 | 17.5 | 99.4  |
| W0108-30                                                                                                                                                                                                               | 132 | 69129  | 2.0 | 4.7415 | 1.4 | 16.2338 | 2.5 | 0.5583 | 2.1 | 0.83 | 2859.4 | 48.7 | 2890.7 | 24.2 | 2912.5 | 22.7 | 2912.5 | 22.7 | 98.2  |
| W0108-34                                                                                                                                                                                                               | 243 | 129741 | 1.6 | 3.2760 | 1.1 | 29.6131 | 1.6 | 0.7036 | 1.2 | 0.73 | 3434.3 | 31.7 | 3474.1 | 16.1 | 3497.1 | 17.5 | 3497.1 | 17.5 | 98.2  |
|                                                                                                                                                                                                                        |     |        |     |        |     |         |     |        |     |      |        |      |        |      |        |      |        |      |       |
| Notes for analyses presented herein:                                                                                                                                                                                   |     |        |     |        |     |         |     |        |     |      |        |      |        |      |        |      |        |      |       |
| Analyses that include only a best age were conducted by Apatite to Zircon, Inc. No additional indformation is available.                                                                                               |     |        |     |        |     |         |     |        |     |      |        |      |        |      |        |      |        |      |       |
| All other analyses were conducted at the Arizona LaserChron Center using methods described below, by Gehrels et al.m (2008), and at www.laserchron.org.                                                                |     |        |     |        |     |         |     |        |     |      |        |      |        |      |        |      |        |      |       |
| Analyses with >10% uncertainty (1-sigma) in 206Pb/238U age are not included.                                                                                                                                           |     |        |     |        |     |         |     |        |     |      |        |      |        |      |        |      |        |      |       |
| Analyses with >10% uncertainty (1-sigma) in 206Pb/207Pb age are not included, unless 206Pb/238U age is <500 Ma.                                                                                                        |     |        |     |        |     |         |     |        |     |      |        |      |        |      |        |      |        |      |       |
| Best age is determined from 206Pb/238U age for analyses with 206Pb/238U age < ~1000 Ma and from 206Pb/207Pb age for analyses with 206Pb/238Uage > ~1000 Ma.                                                            |     |        |     |        |     |         |     |        |     |      |        |      |        |      |        |      |        |      |       |
| Actual cutoff used is different for each sample, selected to avoid dividing clusters of ages.                                                                                                                          |     |        |     |        |     |         |     |        |     |      |        |      |        |      |        |      |        |      |       |
| Concordance is based on 206Pb/238U age / 206Pb/207Pb age, with 100% = concordant. Value is not reported for 206Pb/238U ages <500 Ma because of large uncertainty in 206Pb/207Pb age.                                   |     |        |     |        |     |         |     |        |     |      |        |      |        |      |        |      |        |      |       |
| Analyses with 206Pb/238U age > 500 Ma and with >30% discordance (<70% concordance) are not included.                                                                                                                   |     |        |     |        |     |         |     |        |     |      |        |      |        |      |        |      |        |      |       |
| Analyses with 206Pb/238U age > 500 Ma and with between 20% and 30% discordance (80%-70% concordance) are noted in red and italics.                                                                                     |     |        |     |        |     |         |     |        |     |      |        |      |        |      |        |      |        |      |       |
| Analyses with 206Pb/238U age > 500 Ma and with >5% reverse discordance (>105% concordance) are not included.                                                                                                           |     |        |     |        |     |         |     |        |     |      |        |      |        |      |        |      |        |      |       |
| All uncertainties are reported at the 1-sigma level, and include only internal (measurement) errors.                                                                                                                   |     |        |     |        |     |         |     |        |     |      |        |      |        |      |        |      |        |      |       |
| External (systematic) errors are shown as 206Pb/238U uncertainty, 206Pb/207Pb uncertainty to the right of each sample (in %, at 2-sigma level).                                                                        |     |        |     |        |     |         |     |        |     |      |        |      |        |      |        |      |        |      |       |
| U concentration and U/Th are calibrated relative to Sri Lanka zircon and are accurate to ~20%.                                                                                                                         |     |        |     |        |     |         |     |        |     |      |        |      |        |      |        |      |        |      |       |
| Common Pb correction is from 204Pb, with composition interpreted from Stacey and Kramers (1975).                                                                                                                       |     |        |     |        |     |         |     |        |     |      |        |      |        |      |        |      |        |      |       |
| Uncertainties of 1.5 for 206Pb/204Pb, 0.3 for 207Pb/ 204Pb, and 2.0 for 208Pb/ 204Pb are applied to common Pb composition.                                                                                             |     |        |     |        |     |         |     |        |     |      |        |      |        |      |        |      |        |      |       |
| U/Pb and 206Pb/207Pb fractionation is calibrated relative to fragments of a large Sri Lanka zircon of 563.5 ± 3.2 Ma (2-sigma).                                                                                        |     |        |     |        |     |         |     |        |     |      |        |      |        |      |        |      |        |      |       |
| U decay constants and composition as follows: 238U = 9.8485 x 10-10, 235U = 1.55125 x 10-10, 238U/235U = 137.88                                                                                                        |     |        |     |        |     |         |     |        |     |      |        |      |        |      |        |      |        |      |       |
|                                                                                                                                                                                                                        |     |        |     |        |     |         |     |        |     |      |        |      |        |      |        |      |        |      |       |
| Gehrels, G.E., Valencia, V., Ruiz, J., 2008, Enhanced precision, accuracy, efficiency, and spatial resolution of U-Pb ages by laser ablation-multicollector-inductively coupled plasma-mass spectrometry: Geochemistry |     |        |     |        |     |         |     |        |     |      |        |      |        |      |        |      |        |      |       |
| Stacey, J.S., and Kramers, J.D., 1975. Approximation of terrestrial lead isotope evolution by a two stage model: Earth and Planetary Science Letters, v. 26, p. 207-221.                                               |     |        |     |        |     |         |     |        |     |      |        |      |        |      |        |      |        |      |       |

ics, Geosystems, v. 9, Q03017, doi:10.1029/2007GC001805.
